# Supplementary material for: Towards rational nanomaterial design by predicting drug–nanoparticle system interaction vs. bacterial metabolic networks
Source: Royal Society of Chemistry journal article supplement (doi:10.1039/d1en00967b), 2022-01-01
Supplement: d1en00967b3.xlsx [file d1en00967b3.xlsx]

## Sheet: SAVG
	Mutant		Mutant	Only change here!!!	Drug Avg.	0.653711	0.626546	0.537279	0.657482	0.547816	0.466505	0.504858	0.694039	0.497982	0.562236	0.720763	0.651044	0.663299	0.281064	0.572437	0.551199	0.527702	0.460403	0.472759	0.563797
	Lin,Loutd-0.1		d	-0.1	n	110	99	95	89	84	83	81	69	68	66	62	60	52	47	47	42	37	37	37	34
CONCATENATE	cd1 = Assay Org.	MRNs	NP	COAT		Moxifloxacin	Imipenem	Azithromycin	Gatifloxacin	Clarithromycin	Tetracycline	Ampicillin	Kanamycin	Ceftriaxone	Penicillin	Ceftazidime	Penicillin G	Cephalothin	Doxycycline	Ofloxacin	Cefuroxime	Cefotaxime	Rifampin	Streptomycin	Metronidazole	Avg.
AgBSN/A	Bacillus subtilis	BS	Ag	N/A	14		0.921986				0.899358	0.870974	0.849129		0.910518	0.923834	0.923834			0.923834		0.908884		0.838873		0.897122
CuBSN/A	Bacillus subtilis	BS	Cu	N/A	17		0.572139		0.16737		0.463624	0.483046	0.431525	0.457171	0.489534	0.441428	0.584805			0.62672		0.579968		0.182715		0.45667
CuIBSN/A	Bacillus subtilis	BS	CuI	N/A	15		0.916807				0.910667	0.885066	0.86218		0.887682	0.866894	0.920684			0.932599		0.927533	0.767197	0.912265		0.889961
CuOBSN/A	Bacillus subtilis	BS	CuO	N/A	26			0.746519		0.746519	0.32423	0.760979	0.726361	0.741573	0.765671	0.837558	0.823821	0.760979	0.746519	0.770299	0.751402	0.844503	0.514318	0.710604		0.723241
Fe2O3BSN/A	Bacillus subtilis	BS	Fe2O3	N/A	12						0.746519	0.760979	0.726361	0.741573	0.503385		0.765671			0.770299			0.514318	0.710604		0.693301
ZnOBSN/A	Bacillus subtilis	BS	ZnO	N/A	16		0.820019		0.765671			0.760979	0.726361	0.741573	0.765671		0.765671			0.765671	0.751402		0.514318	0.710604		0.735267
AgECN/A	Escherichia coli	EC	Ag	N/A	12	0.954643	0.954643		0.857527	0.888489			0.944746			0.949925		0.8687							0.913165	0.91648
AuECPDT/CQ	Escherichia coli	EC	Au	PDT/CQ	12	0.999582	0.999559		0.999571				0.999728			0.999536		0.999761							0.999882	0.99966
CuECN/A	Escherichia coli	EC	Cu	N/A	11	0.744468	0.744468		0.585341				0.702981			0.724207		0.478031							0.711515	0.670144
CuIECN/A	Escherichia coli	EC	CuI	N/A	10	0.878526	0.875727		0.872872				0.847975			0.866995		0.878526							0.923056	0.877668
CuOECN/A	Escherichia coli	EC	CuO	N/A	10	0.739496	0.879031		0.744468				0.85514			0.870498		0.879031							0.739496	0.815309
AgEFN/A	Enterococcus faecalis	EF	Ag	N/A	21		0.217744	0.345262	0.3334	0.150331	0.220089	0.217744	0.184425			0.305187		0.327652	0.22458	0.0978134		0.253059		0.138928	0.3334	0.239258
CuEFN/A	Enterococcus faecalis	EF	Cu	N/A	22		0.0482509	0.0680286	0.0425854	0.0239054	0.0573156	0.0522585	0.0303513			0.0573156	0.0118116	0.0631941	0.0385451	0.0380401				0.0288592		0.0431124
CuIEFN/A	Enterococcus faecalis	EF	CuI	N/A	22	0.400271	0.294684	0.248342	0.268238		0.213919	0.0896719	0.269625	0.363506				0.357296	0.167938	0.363282				0.196724		0.269458
CuOEFN/A	Enterococcus faecalis	EF	CuO	N/A	31	0.131606	0.128666	0.137773	0.118738	0.12018	0.10829	0.128666	0.094134	0.114795	0.216262	0.117461	0.113409	0.186886	0.10829	0.118738		0.10829		0.102244		0.126731
Fe2O3EFN/A	Enterococcus faecalis	EF	Fe2O3	N/A	16	0.131606	0.128666		0.118738		0.10829	0.128666	0.0875799	0.114795	0.154732		0.113409		0.137773					0.102244		0.120591
ZnOEFN/A	Enterococcus faecalis	EF	ZnO	N/A	17	0.131606	0.119449		0.118738		0.10829	0.109875		0.114795			0.113409	0.116047	0.10829	0.161649		0.148059		0.102244		0.121038
AgHIN/A	Haemophilus influenzae	HI	Ag	N/A	20	0.847698	0.859155	0.868434	0.933088	0.840869		0.844314		0.846108	0.919347						0.852751	0.852751	0.830164			0.863153
CuHIN/A	Haemophilus influenzae	HI	Cu	N/A	20	0.43517	0.428797	0.422448	0.658739	0.428797		0.428797		0.40356							0.44495	0.44495	0.542246			0.463845
CuIHIN/A	Haemophilus influenzae	HI	CuI	N/A	20	0.863934	0.860852	0.774931	0.917465	0.857711		0.874351		0.847934	0.928589	0.865538					0.868533	0.868533				0.866216
CuOHIN/A	Haemophilus influenzae	HI	CuO	N/A	28	0.775482	0.713647	0.726875	0.747008	0.726875	0.410665	0.718925		0.721688	0.724144	0.756877	0.713647				0.472606	0.732001	0.697462			0.688421
Fe2O3HIN/A	Haemophilus influenzae	HI	Fe2O3	N/A	17	0.775482	0.742068	0.726875	0.747008	0.726875		0.742068		0.721688	0.724144						0.472606	0.732001				0.711081
ZnOHIN/A	Haemophilus influenzae	HI	ZnO	N/A	19	0.724144	0.718925	0.581065	0.724144	0.726875		0.742068		0.752066			0.747008				0.472606	0.732001	0.697462			0.692578
CuOMBN/A	Mycobacterium bovis BCG	MB	CuO	N/A	10			0.097344		0.0996502		0.097344	0.132983							0.106863			0.0950855	0.0805514		0.101403
AgMTN/A	Mycobacterium tuberculosis	MT	Ag	N/A	12	0.724375			0.963834				0.913581							0.928638			0.926063	0.956722	0.88937	0.900369
CuIMTN/A	Mycobacterium tuberculosis	MT	CuI	N/A	12	0.821592			0.913854				0.832999							0.825367			0.805852	0.808931		0.834766
CuOMTN/A	Mycobacterium tuberculosis	MT	CuO	N/A	14	0.873472			0.610991	0.631819			0.832942							0.88493			0.625757	0.567767	0.65564	0.710415
AgNGN/A	Neisseria gonorrhoeae	NG	Ag	N/A	10	0.433129		0.306736			0.126761	0.298362		0.28231	0.138714		0.303828									0.269977
CuINGN/A	Neisseria gonorrhoeae	NG	CuI	N/A	10	0.332381		0.14207			0.14207	0.409754		0.138934	0.15521		0.332381									0.236114
CuONGN/A	Neisseria gonorrhoeae	NG	CuO	N/A	12			0.15649	0.187997		0.0640768	0.259875		0.15649	0.0705969		0.170699		0.15649						0.170699	0.154824
CuONMN/A	Neisseria meningitidis	NM	CuO	N/A	16	0.104499		0.109556	0.12011	0.140679	0.0855121	0.150365		0.0835027	0.104499		0.0939942				0.0333564	0.140679	0.0317215		0.0939942	0.0994205
AuPAPDT/Mel	Pseudomonas aeruginosa	PA	Au	PDT/Mel	15	0.999977	0.999931		0.999933				0.999965		0.99996	0.999921	0.999931	0.999931								0.999944
AuPAPDT/CQ	Pseudomonas aeruginosa	PA	Au	PDT/CQ	12	0.999667	0.999659		0.999403				0.999721			0.999563	0.999616	0.999616								0.999606
AuPAPDT/CPB	Pseudomonas aeruginosa	PA	Au	PDT/CPB	11	0.999813	0.999444		0.999113				0.999126		0.999813	0.999674		0.999759								0.999534
AuPAPDT/G	Pseudomonas aeruginosa	PA	Au	PDT/G	10	0.999926	0.999779						0.999835			0.99986	0.999773	0.99987								0.999841
AuPAPDT/ACh	Pseudomonas aeruginosa	PA	Au	PDT/ACh	10		0.999701	0.998127	0.99943				0.999279			0.999674										0.999242
AuPAPDT/DMB	Pseudomonas aeruginosa	PA	Au	PDT/DMB	10	0.998156	0.998382		0.993816				0.998531			0.999274	0.997872	0.999235								0.997895
AuPAPDT	Pseudomonas aeruginosa	PA	Au	PDT	10	0.991277	0.985211		0.985211				0.993809		0.952688	0.994417	0.994965	0.994965								0.986568
CuOPAN/A	Pseudomonas aeruginosa	PA	CuO	N/A	15	0.881653	0.636382	0.83615	0.846548				0.821415		0.846548	0.834543	0.906177	0.849892								0.828812
AgPNN/A	Streptococcus pneumoniae	PN	Ag	N/A	27	0.589122	0.724563	0.332699	0.589122	0.27499	0.299046	0.249124		0.317257	0.589122		0.665233	0.548793	0.52619		0.332699	0.14058				0.441324
AgPNGlutathione	Streptococcus pneumoniae	PN	Ag	Glutathione	14	0.218501	0.0743474	0.181208			0.04386			0.0710468	0.0705521		0.0672208			0.201279	0.20623	0.0693515				0.12036
AgPNGlucose	Streptococcus pneumoniae	PN	Ag	Glucose	12	0.257871		0.0782868	0.273061	0.41773		0.0683732		0.248055	0.257871						0.0782868					0.209942
AuPNPDT	Streptococcus pneumoniae	PN	Au	PDT	15	0.873852	0.618323	0.781003	0.884867	0.568234	0.568234			0.56185	0.593521	0.867837	0.798254				0.824186					0.721833
AuPNPDT/CQ	Streptococcus pneumoniae	PN	Au	PDT/CQ	14	0.996412	0.996318	0.993055	0.993736	0.985484	0.981401	0.982771		0.980921	0.994051		0.993736				0.994708	0.992179				0.990398
AuPNPDT/CPB	Streptococcus pneumoniae	PN	Au	PDT/CPB	14	0.994681	0.991956	0.990851	0.995204		0.978593	0.945187		0.971925	0.99545		0.99379				0.973309	0.973309				0.982205
AuPNPDT/G	Streptococcus pneumoniae	PN	Au	PDT/G	14	0.99788		0.995889	0.998088		0.988939			0.996437	0.990019		0.99788	0.997987			0.99052	0.989219				0.994286
AuPNPDT/ACh	Streptococcus pneumoniae	PN	Au	PDT/ACh	13	0.991746		0.98972	0.990725	0.989981	0.978593			0.989453	0.97526		0.97526				0.973309	0.960362				0.981441
AuPNPDT/DMB	Streptococcus pneumoniae	PN	Au	PDT/DMB	13	0.913409	0.915441	0.966643	0.966198	0.924429	0.924429			0.90257	0.913409		0.980409				0.907044	0.86637				0.925487
AuPNPDT/Mel	Streptococcus pneumoniae	PN	Au	PDT/Mel	11	0.998977	0.998836	0.998741		0.997353	0.994887			0.996508	0.996932	0.998741	0.998991									0.997774
CdOPNN/A	Streptococcus pneumoniae	PN	CdO	N/A	10	0.0150157	0.0147468								0.0146364							0.0135541				0.0144882
CdSPNN/A	Streptococcus pneumoniae	PN	CdS	N/A	11	0.187092		0.171802						0.157519	0.171802						0.165587					0.17076
CuPNN/A	Streptococcus pneumoniae	PN	Cu	N/A	29	0.0139136	0.0694896	0.0498834	0.0607047	0.0550442	0.0557619	0.0607047		0.05441	0.071188	0.0816895	0.0711239	0.0877286			0.0645585	0.0511289				0.0605235
CuIPNN/A	Streptococcus pneumoniae	PN	CuI	N/A	22	0.107783	0.318683	0.302008		0.307512	0.0959155	0.46957		0.333106	0.350635	0.431015	0.324349				0.140801	0.140801				0.276848
CuOPNN/A	Streptococcus pneumoniae	PN	CuO	N/A	34	0.331116	0.178657	0.308523	0.331116	0.258563	0.258563	0.180463		0.163917	0.1825		0.1825	0.257871	0.0619269		0.215728	0.171161	0.163917			0.216435
Fe2O3PNN/A	Streptococcus pneumoniae	PN	Fe2O3	N/A	25	0.368264	0.273779	0.342939	0.331116	0.151742	0.0420191	0.180463		0.186555	0.331116		0.1825		0.0619269		0.329985	0.063453				0.218912
SnO2PNN/A	Streptococcus pneumoniae	PN	SnO2	N/A	10	0.368264	0.361998	0.342939	0.331116	0.308523				0.329985	0.331116						0.263573		0.253615			0.321237
ZnOPNN/A	Streptococcus pneumoniae	PN	ZnO	N/A	20	0.331116	0.178657	0.308523	0.354516	0.151742	0.258563	0.180463		0.163917	0.331116		0.206909				0.215728	0.171161				0.237701
AgSTN/A	Streptococcus pyogenes	ST	Ag	N/A	19	0.448271	0.196145	0.110646	0.62033	0.108116	0.534597	0.262051		0.264711	0.11855							0.667889	0.161536	0.0578197	0.282632	0.294869
AuSTPDT/DMB	Streptococcus pyogenes	ST	Au	PDT/DMB	12	0.965332	0.960193	0.962628		0.97504	0.958159	0.944875		0.956026			0.961174			0.966191	0.981972			0.95379		0.962307
AuSTPDT/CQ	Streptococcus pyogenes	ST	Au	PDT/CQ	12	0.993571		0.993053		0.9939	0.992495	0.995195		0.99112	0.992774		0.994499	0.993312			0.996869					0.993679
AuSTPDT	Streptococcus pyogenes	ST	Au	PDT	12	0.798218	0.769526	0.806606		0.760184	0.760184	0.755417		0.877424	0.780882		0.818472			0.907414				0.810612		0.804085
AuSTPDT/Mel	Streptococcus pyogenes	ST	Au	PDT/Mel	11	0.99936	0.998547	0.998509	0.998835	0.998621		0.99811					0.999477		0.999434			0.998741				0.998848
AuSTPDT/ACh	Streptococcus pyogenes	ST	Au	PDT/ACh	11	0.99475	0.989028	0.989718	0.990482	0.990968		0.984629					0.989306				0.989176	0.989718				0.989753
AuSTPDT/CPB	Streptococcus pyogenes	ST	Au	PDT/CPB	10	0.990482	0.989028	0.989718		0.993197	0.98845	0.984629			0.989979		0.995704			0.990723						0.990212
AuSTPDT/G	Streptococcus pyogenes	ST	Au	PDT/G	10	0.996196	0.995611	0.995888		0.995781	0.995378	0.993834		0.99544	0.995723											0.995481
CuSTN/A	Streptococcus pyogenes	ST	Cu	N/A	16	0.184449	0.0768813	0.0169299		0.0302974	0.0169299	0.0163144		0.066525	0.0182767	0.0737365			0.0477921			0.0791259	0.0179948			0.0537711
CuISTN/A	Streptococcus pyogenes	ST	CuI	N/A	12	0.421255	0.303469	0.277763		0.44677	0.124286	0.288304	0.0686752	0.267463	0.318634					0.543188						0.305981
CuOSTN/A	Streptococcus pyogenes	ST	CuO	N/A	25	0.307179	0.158521	0.299001	0.146676	0.285521	0.283968	0.193339		0.200578	0.315584		0.162016	0.297082	0.146037	0.20157	0.131156	0.0554249	0.128224	0.145088		0.203351
ZnOSTN/A	Streptococcus pyogenes	ST	ZnO	N/A	14	0.307179	0.103205	0.299001		0.285521	0.299001	0.193339		0.263325	0.315584	0.221946				0.20157					0.0527188	0.231126
CuITYN/A	Salmonella enterica subsp. enterica serovar Typhi	TY	CuI	N/A	11	0.915574			0.888151		0.559115	0.811533	0.862739			0.885545	0.890705							0.902485		0.839481
CuOTYN/A	Salmonella enterica subsp. enterica serovar Typhi	TY	CuO	N/A	26	0.652195	0.640321	0.622186	0.789112		0.622186	0.669655	0.720991	0.757091	0.723353	0.652195		0.640321	0.684225	0.839374	0.640321	0.747411		0.380026		0.67381

## Sheet: SIMUL
		Lin-1%-,Lout	Lin-1%-,Lout-1%-	Lin,Lout-1%-	Lin-1%-,Lout	Lin-1%-,Lout-1%-	Lin,Lout-1%-																										Mutant	Mutantd(%)	-1	Change only in SAVG Sheet!!!
Run			f(vij,vnj,vsj)calc			p(f(vij,vnj,vsj)calc=1)		CMPD	NP	MRNs	COAT	CMPND_KEY	cd0 = Activity (Units)	d(c0)	cutoff	cn0 = Property	cd1 = Assay Org.	cd2 = Strain	MRNs_KEY	cs1 = Gram()	cs2 = Pathog.	cn1 = Organism	cn2 = Strain	cn3 = Shape	cc1 = Coating mult.	cc2 = Poly.	f(i,j,s,n,c)obs	Set	f(cd0,cn0)ref	DSh1(ALOGPi)cj	DSh4(Lins)cs	DSh5(Louts)cs	Dxx%-	DSh(Lins,d)cs	DSh5(LoutsDxx%-)cs	DSh1(AMVn)cn	DSh1(APSn)cn	DSh1(Time)cn	DDSh2(PSAi,1c,2c)
1	CuOBSN/AAmikacin	1.06458	7.60784	0.786878	0.743565	0.999504	0.687161	CHEMBL1164318	CuO	BS	N/A	Amikacin	MIC ug.mL-1	-1	50	MBC (uM)	Bacillus subtilis	CGMCC1.1162	BS	Gram	NO	Bacillus sbtilis	MD	N/A	None	None	0	t	0.324	0.001	0.014	0.015	BSD-0.1%-	0.00794668	0.0210921	-0.147	-0.15	0	-0.012
2	CuOECN/AAmikacin	2.93786	4.83318	1.04335	0.949686	0.992102	0.739496	CHEMBL1164318	CuO	EC	N/A	Amikacin	MIC ug.mL-1	-1	50	MBC (uM)	Escherichia coli	N43	EC	Gram-	GIT	Escherichia coli	MD	N/A	None	None	0	t	0.324	0	0.01	0.011	ECD-0.1%-	0.00663668	0.0167646	-0.147	-0.15	0	0
3	CuIECN/AAmikacin	3.74319	5.63851	1.84868	0.976869	0.996454	0.863972	CHEMBL1164318	CuI	EC	N/A	Amikacin	MIC ug.mL-1	-1	50	MBC (uM)	Escherichia coli	W4573	EC	Gram-	GIT	Escherichia coli	ATCC10536	N/A	None	None	0	t	0.324	0	0.01	0.011	ECD-0.1%-	0.00663668	0.0167646	-0.143	-0.15	-0.001	-0.003
4	AgECGlucoseAmikacin	1.97394	3.86926	1.20624	0.878033	0.979553	0.769633	CHEMBL1164318	Ag	EC	Glucose	Amikacin	MIC ug.mL-1	-1	50	MIC (uM)	Escherichia coli	CGMCC1.1571	EC	Gram-	GIT	Escherichia coli	ATCC25922	Spherical	Single	Monomer	0	v	0.424	0.001	0.01	0.011	ECD-0.1%-	0.00763668	0.0167646	-0.147	-0.15	0	-0.012
5	CuECN/AAmikacin	3.4979	5.39322	1.60339	0.970628	0.995473	0.832492	CHEMBL1164318	Cu	EC	N/A	Amikacin	MIC ug.mL-1	-1	50	MIC (uM)	Escherichia coli	ATCCBAA-201	EC	Gram-	GIT	Escherichia coli	ATCC25922	Spherical	None	None	0	t	0.424	0	0.01	0.011	ECD-0.1%-	0.00663668	0.0167646	-0.147	-0.15	0	0
6	ZnOBSN/AAmikacin	2.32881	8.87207	0.924291	0.911235	0.99986	0.715916	CHEMBL177	ZnO	BS	N/A	Amikacin	MIC ug.mL-1	-1	50	MBC (uM)	Bacillus subtilis	n.d	BS	Gram	NO	Bacillus sbtilis	MD	N/A	None	None	0	v	0.324	0	0.014	0.015	BSD-0.1%-	0.00694668	0.0210921	-0.147	-0.15	0	-0.01
7	AgBSN/AAmikacin	3.43878	9.98204	2.03427	0.968895	0.999954	0.884348	CHEMBL177	Ag	BS	N/A	Amikacin	IZ mm	1	5	MBC (uM)	Bacillus subtilis	n.d	BS	Gram	NO	Bacillus subtilis	ATCC6633	Spherical	None	None	0	t	0.388	0	0.014	0.015	BSD-0.1%-	0.00694668	0.0210921	-0.147	-0.135	-0.001	-0.01
8	CuOBSN/AAmikacin	1.33396	7.87722	-0.0705531	0.791495	0.999621	0.482369	CHEMBL177	CuO	BS	N/A	Amikacin	MIC nM	-1	2500	MIC (uM)	Bacillus subtilis	ATCC6633	BS	Gram	NO	Bacillus sbtilis	MD	N/A	None	None	0	t	0.151	0	0.014	0.015	BSD-0.1%-	0.00694668	0.0210921	-0.147	-0.15	0	-0.011
9	CuOBSN/AAmikacin	1.62462	8.16788	1.34692	0.835431	0.999716	0.793625	CHEMBL177	CuO	BS	N/A	Amikacin	MIC ug.mL-1	-1	50	MIC (uM)	Bacillus subtilis	CGMCC1.1162	BS	Gram	NO	Bacillus sbtilis	MD	N/A	None	None	0	v	0.424	0.001	0.014	0.015	BSD-0.1%-	0.00794668	0.0210921	-0.147	-0.15	0	-0.012
10	CuIBSN/AAmikacin	3.7721	10.3154	2.36758	0.977514	0.999967	0.914322	CHEMBL177	CuI	BS	N/A	Amikacin	MIC ug.mL-1	-1	50	MIC (uM)	Bacillus subtilis	n.d	BS	Gram	NO	Bacillus subtilis	ATCC6633	N/A	None	None	0	t	0.424	0	0.014	0.015	BSD-0.1%-	0.00694668	0.0210921	-0.143	-0.15	-0.001	-0.01
11	CuOBSN/AAmikacin	1.65059	8.19385	1.37289	0.838971	0.999724	0.797847	CHEMBL177	CuO	BS	N/A	Amikacin	MIC ug.mL-1	-1	50	MIC (uM)	Bacillus subtilis	CGMCC 1.1162	BS	Gram	NO	Bacillus sbtilis	MD	N/A	None	None	0	t	0.424	0.001	0.014	0.015	BSD-0.1%-	0.00794668	0.0210921	-0.147	-0.15	0	-0.011
12	CuOBSN/AAmikacin	3.32771	9.87097	1.92319	0.965367	0.999948	0.872494	CHEMBL177	CuO	BS	N/A	Amikacin	IZ mm	1	5	MIC (uM)	Bacillus subtilis	ATCC6633	BS	Gram	NO	Bacillus sbtilis	MD	N/A	None	None	0	t	0.507	0	0.014	0.015	BSD-0.1%-	0.00694668	0.0210921	-0.147	-0.15	0	-0.011
13	CuOBSN/AAmikacin	2.15519	8.69845	0.750679	0.896153	0.999833	0.679327	CHEMBL177	CuO	BS	N/A	Amikacin	Kd nM	1	100	MIC (uM)	Bacillus subtilis	n.d	BS	Gram	NO	Bacillus sbtilis	MD	N/A	None	None	0	v	0.293	0	0.014	0.015	BSD-0.1%-	0.00694668	0.0210921	-0.147	-0.15	0	-0.01
14	ZnOEFN/AAmikacin	2.14386	71.9547	-2.29015	0.895094	1	0.0919424	CHEMBL177	ZnO	EF	N/A	Amikacin	MIC ug.mL-1	-1	50	MBC (uM)	Enterococcus faecalis	ATCC29212	EF	Gram	GIT	Bacillus sbtilis	MD	N/A	None	None	0	t	0.324	0	0.073	0.075	EFD-0.1%-	0.00711082	0.0799971	-0.147	-0.15	0	-0.01
15	AgEFN/AAmikacin	2.86943	72.6803	-1.56457	0.946315	1	0.172992	CHEMBL177	Ag	EF	N/A	Amikacin	MIC ug.mL-1	-1	50	MBC (uM)	Enterococcus faecalis	ATCC51299	EF	Gram	GIT	Bacillus subtilis	ATCC6633	Spherical	None	None	0	v	0.324	0	0.073	0.075	EFD-0.1%-	0.00711082	0.0799971	-0.147	-0.135	-0.001	-0.011
16	AgEFN/AAmikacin	3.01302	72.8239	-1.42099	0.953159	1	0.194507	CHEMBL177	Ag	EF	N/A	Amikacin	MIC90 ug.mL-1	-1	34.891	MBC (uM)	Enterococcus faecalis	n.d	EF	Gram	GIT	Bacillus subtilis	ATCC6633	Spherical	None	None	0	t	0.345	0	0.073	0.075	EFD-0.1%-	0.00711082	0.0799971	-0.147	-0.135	-0.001	-0.01
17	AgEFN/AAmikacin	3.16983	72.9807	-1.26418	0.959683	1	0.220256	CHEMBL177	Ag	EF	N/A	Amikacin	MIC50 ug.mL-1	-1	21.529	MBC (uM)	Enterococcus faecalis	n.d	EF	Gram	GIT	Bacillus subtilis	ATCC6633	Spherical	None	None	0	t	0.373	0	0.073	0.075	EFD-0.1%-	0.00711082	0.0799971	-0.147	-0.135	-0.001	-0.01
18	CuOEFN/AAmikacin	2.14386	71.9547	-2.29015	0.895094	1	0.0919424	CHEMBL177	CuO	EF	N/A	Amikacin	MIC ug.mL-1	-1	50	MBC (uM)	Enterococcus faecalis	n.d	EF	Gram	GIT	Bacillus sbtilis	MD	N/A	None	None	0	t	0.324	0	0.073	0.075	EFD-0.1%-	0.00711082	0.0799971	-0.147	-0.15	0	-0.01
19	CuOEFN/AAmikacin	2.14386	71.9547	-2.29015	0.895094	1	0.0919424	CHEMBL177	CuO	EF	N/A	Amikacin	MIC ug.mL-1	-1	50	MBC (uM)	Enterococcus faecalis	n.d	EF	Gram	GIT	Bacillus sbtilis	MD	N/A	None	None	0	v	0.324	0	0.073	0.075	EFD-0.1%-	0.00711082	0.0799971	-0.147	-0.15	0	-0.01
20	CuOEFN/AAmikacin	2.14386	71.9547	-2.29015	0.895094	1	0.0919424	CHEMBL177	CuO	EF	N/A	Amikacin	MIC ug.mL-1	-1	50	MBC (uM)	Enterococcus faecalis	n.d	EF	Gram	GIT	Bacillus sbtilis	MD	N/A	None	None	0	t	0.324	0	0.073	0.075	EFD-0.1%-	0.00711082	0.0799971	-0.147	-0.15	0	-0.01
21	CuOEFN/AAmikacin	2.14386	71.9547	-2.29015	0.895094	1	0.0919424	CHEMBL177	CuO	EF	N/A	Amikacin	MIC ug.mL-1	-1	50	MBC (uM)	Enterococcus faecalis	n.d	EF	Gram	GIT	Bacillus sbtilis	MD	N/A	None	None	0	t	0.324	0	0.073	0.075	EFD-0.1%-	0.00711082	0.0799971	-0.147	-0.15	0	-0.01
22	CuEFN/AAmikacin	1.94284	71.7537	-2.49117	0.874664	1	0.0764798	CHEMBL177	Cu	EF	N/A	Amikacin	IZ mm	1	5	MIC (uM)	Enterococcus faecalis	ATCC29212	EF	Gram	GIT	Bacillus subtilis	ATCC6633	Spherical	None	None	0	t	0.507	0	0.073	0.075	EFD-0.1%-	0.00711082	0.0799971	-0.147	-0.15	-0.001	-0.01
23	CuOEFN/AAmikacin	2.7039	72.5147	-1.7301	0.937256	1	0.150574	CHEMBL177	CuO	EF	N/A	Amikacin	MIC ug.mL-1	-1	50	MIC (uM)	Enterococcus faecalis	n.d	EF	Gram	GIT	Bacillus sbtilis	MD	N/A	None	None	0	v	0.424	0	0.073	0.075	EFD-0.1%-	0.00711082	0.0799971	-0.147	-0.15	0	-0.01
24	CuOEFN/AAmikacin	2.98961	72.8004	-1.4444	0.952102	1	0.190865	CHEMBL177	CuO	EF	N/A	Amikacin	MIC ug.mL-1	-1	50	MIC (uM)	Enterococcus faecalis	ATCC1299	EF	Gram	GIT	Bacillus sbtilis	MD	N/A	None	None	0	t	0.424	0	0.073	0.075	EFD-0.1%-	0.00711082	0.0799971	-0.147	-0.15	0	0.001
25	CuOEFN/AAmikacin	2.7039	72.5147	-1.7301	0.937256	1	0.150574	CHEMBL177	CuO	EF	N/A	Amikacin	MIC ug.mL-1	-1	50	MIC (uM)	Enterococcus faecalis	n.d	EF	Gram	GIT	Bacillus sbtilis	MD	N/A	None	None	0	t	0.424	0	0.073	0.075	EFD-0.1%-	0.00711082	0.0799971	-0.147	-0.15	0	-0.01
26	CuIEFN/AAmikacin	3.58715	73.398	-0.846856	0.973068	1	0.300093	CHEMBL177	CuI	EF	N/A	Amikacin	MIC ug.mL-1	-1	50	MIC (uM)	Enterococcus faecalis	ATCC29212	EF	Gram	GIT	Bacillus subtilis	ATCC6633	N/A	None	None	0	t	0.424	0	0.073	0.075	EFD-0.1%-	0.00711082	0.0799971	-0.143	-0.15	-0.001	-0.01
27	CuOEFN/AAmikacin	2.7039	72.5147	-1.7301	0.937256	1	0.150574	CHEMBL177	CuO	EF	N/A	Amikacin	MIC ug.mL-1	-1	50	MIC (uM)	Enterococcus faecalis	ATCC25923	EF	Gram	GIT	Bacillus sbtilis	MD	N/A	None	None	0	t	0.424	0	0.073	0.075	EFD-0.1%-	0.00711082	0.0799971	-0.147	-0.15	0	-0.01
28	CuOHIN/AAmikacin	0.952879	43.2833	0.953821	0.721694	1	0.721883	CHEMBL177	CuO	HI	N/A	Amikacin	MIC50 ug.mL-1	-1	21.529	MBC (uM)	Haemophilus influenzae	n.d	HI	Gram-	Systemic	Bacillus sbtilis	MD	N/A	None	None	0	t	0.373	0	0.046	0.047	HID-0.1%-	0.00843435	0.0544116	-0.147	-0.15	0	-0.009
29	CuHIN/AAmikacin	0.0126047	42.343	0.0135462	0.503151	1	0.503387	CHEMBL177	Cu	HI	N/A	Amikacin	MIC ug.mL-1	-1	50	MIC (uM)	Haemophilus influenzae	n.d	HI	Gram-	Systemic	Bacillus subtilis	ATCC6633	Spherical	None	None	0	t	0.424	0	0.046	0.047	HID-0.1%-	0.00843435	0.0544116	-0.147	-0.15	-0.001	-0.009
30	CuOHIN/AAmikacin	1.39531	43.7257	1.39625	0.801439	1	0.801589	CHEMBL177	CuO	HI	N/A	Amikacin	MIC90 ug.mL-1	-1	34.891	MIC (uM)	Haemophilus influenzae	n.d	HI	Gram-	Systemic	Bacillus sbtilis	MD	N/A	None	None	0	v	0.452	0	0.046	0.047	HID-0.1%-	0.00843435	0.0544116	-0.147	-0.15	0	-0.009
31	ZnOMBN/AAmikacin	2.20731	76.3287	-2.40891	0.900904	1	0.0824961	CHEMBL177	ZnO	MB	N/A	Amikacin	MIC ug.mL-1	-1	50	MBC (uM)	Mycobacterium bovis	BCG-Connaught	MB	Gram	Respiratory	Bacillus sbtilis	MD	N/A	None	None	0	t	0.324	0	0.077	0.078	MBD-0.1%-	0.00712365	0.0840104	-0.147	-0.15	0	-0.007
32	ZnOMTN/AAmikacin	0.776457	25.9791	1.72829	0.684916	1	0.849193	CHEMBL177	ZnO	MT	N/A	Amikacin	MIC>99 uM	-1	11.651	MBC (uM)	Mycobacterium tuberculosis	4.708	MT	Gram-	Respiratory	Bacillus sbtilis	MD	N/A	None	None	0	t	0.355	0	0.03	0.032	MTD-0.1%-	0.0084784	0.0384648	-0.147	-0.15	0	-0.01
33	AgMTN/AAmikacin	0.157934	25.3606	1.10976	0.539402	1	0.752085	CHEMBL177	Ag	MT	N/A	Amikacin	MIC nM	-1	2500	MBC (uM)	Mycobacterium tuberculosis	H37Rv	MT	Gram-	Respiratory	Bacillus subtilis	ATCC6633	Spherical	None	None	0	v	0.115	0	0.03	0.032	MTD-0.1%-	0.0084784	0.0384648	-0.147	-0.135	-0.001	-0.011
34	AgMTN/AAmikacin	0.183907	25.3866	1.13574	0.545848	1	0.756896	CHEMBL177	Ag	MT	N/A	Amikacin	MIC nM	-1	2500	MBC (uM)	Mycobacterium tuberculosis	Praha 1	MT	Gram-	Respiratory	Bacillus subtilis	ATCC6633	Spherical	None	None	0	t	0.115	0	0.03	0.032	MTD-0.1%-	0.0084784	0.0384648	-0.147	-0.135	-0.001	-0.01
35	CuOMTN/AAmikacin	0.776457	25.9791	1.72829	0.684916	1	0.849193	CHEMBL177	CuO	MT	N/A	Amikacin	MIC>99 uM	-1	11.651	MBC (uM)	Mycobacterium tuberculosis	4.311	MT	Gram-	Respiratory	Bacillus sbtilis	MD	N/A	None	None	0	t	0.355	0	0.03	0.032	MTD-0.1%-	0.0084784	0.0384648	-0.147	-0.15	0	-0.01
36	CuOMTN/AAmikacin	0.776457	25.9791	1.72829	0.684916	1	0.849193	CHEMBL177	CuO	MT	N/A	Amikacin	MIC>99 uM	-1	11.651	MBC (uM)	Mycobacterium tuberculosis	Praha 1	MT	Gram-	Respiratory	Bacillus sbtilis	MD	N/A	None	None	0	t	0.355	0	0.03	0.032	MTD-0.1%-	0.0084784	0.0384648	-0.147	-0.15	0	-0.01
37	CuMTN/AAmikacin	-1.81951	23.3832	-0.867681	0.139493	1	0.295737	CHEMBL177	Cu	MT	N/A	Amikacin	MIC nM	-1	2500	MBC (uM)	Mycobacterium tuberculosis	H37Rv	MT	Gram-	Respiratory	Bacillus subtilis	ATCC6633	Spherical	None	None	0	v	0.115	0	0.03	0.032	MTD-0.1%-	0.0084784	0.0384648	-0.147	-0.15	-0.001	-0.011
38	CuMTN/AAmikacin	-0.449438	24.7532	0.50239	0.389494	1	0.623021	CHEMBL177	Cu	MT	N/A	Amikacin	MIC>99 uM	-1	11.651	MBC (uM)	Mycobacterium tuberculosis	Praha 4	MT	Gram-	Respiratory	Bacillus subtilis	ATCC6633	Spherical	None	None	0	t	0.355	0	0.03	0.032	MTD-0.1%-	0.0084784	0.0384648	-0.147	-0.15	-0.001	-0.01
39	CuIMTN/AAmikacin	0.289634	25.4923	1.24146	0.571907	1	0.775818	CHEMBL177	CuI	MT	N/A	Amikacin	MIC nM	-1	2500	MBC (uM)	Mycobacterium tuberculosis	H37Rv	MT	Gram-	Respiratory	Bacillus subtilis	ATCC6633	N/A	None	None	0	t	0.115	0	0.03	0.032	MTD-0.1%-	0.0084784	0.0384648	-0.143	-0.15	-0.001	-0.011
40	CuOMTN/AAmikacin	-0.567641	24.635	0.384187	0.361781	1	0.594883	CHEMBL177	CuO	MT	N/A	Amikacin	MIC nM	-1	2500	MBC (uM)	Mycobacterium tuberculosis	4.311	MT	Gram-	Respiratory	Bacillus sbtilis	MD	N/A	None	None	0	t	0.115	0	0.03	0.032	MTD-0.1%-	0.0084784	0.0384648	-0.147	-0.15	0	-0.01
41	CuMTN/AAmikacin	-1.59192	23.6107	-0.640093	0.169114	1	0.345225	CHEMBL177	Cu	MT	N/A	Amikacin	MIC nM	-1	2500	MIC (uM)	Mycobacterium tuberculosis	Praha 4	MT	Gram-	Respiratory	Bacillus subtilis	ATCC6633	Spherical	None	None	0	v	0.151	0	0.03	0.032	MTD-0.1%-	0.0084784	0.0384648	-0.147	-0.15	-0.001	-0.01
42	CuOMTN/AAmikacin	1.3925	26.5952	2.34433	0.800991	1	0.912483	CHEMBL177	CuO	MT	N/A	Amikacin	MIC>99 uM	-1	11.651	MIC (uM)	Mycobacterium tuberculosis	0.117	MT	Gram-	Respiratory	Bacillus sbtilis	MD	N/A	None	None	0	t	0.465	0	0.03	0.032	MTD-0.1%-	0.0084784	0.0384648	-0.147	-0.15	0	-0.01
43	CuOMTN/AAmikacin	1.18886	26.3915	2.14069	0.766537	1	0.894795	CHEMBL177	CuO	MT	N/A	Amikacin	MIC ug.mL-1	-1	50	MIC (uM)	Mycobacterium tuberculosis	XDR	MT	Gram-	Respiratory	Bacillus sbtilis	MD	N/A	None	None	0	t	0.424	0	0.03	0.032	MTD-0.1%-	0.0084784	0.0384648	-0.147	-0.15	0	-0.009
44	CuOMTN/AAmikacin	-0.366026	24.8366	0.585802	0.409502	1	0.642401	CHEMBL177	CuO	MT	N/A	Amikacin	MIC nM	-1	2500	MIC (uM)	Mycobacterium tuberculosis	4.708	MT	Gram-	Respiratory	Bacillus sbtilis	MD	N/A	None	None	0	t	0.151	0	0.03	0.032	MTD-0.1%-	0.0084784	0.0384648	-0.147	-0.15	0	-0.01
45	CuOMTN/AAmikacin	1.3925	26.5952	2.34433	0.800991	1	0.912483	CHEMBL177	CuO	MT	N/A	Amikacin	MIC>99 uM	-1	11.651	MIC (uM)	Mycobacterium tuberculosis	Praha 131	MT	Gram-	Respiratory	Bacillus sbtilis	MD	N/A	None	None	0	t	0.465	0	0.03	0.032	MTD-0.1%-	0.0084784	0.0384648	-0.147	-0.15	0	-0.01
46	CuIMTN/AAmikacin	0.517222	25.7199	1.46905	0.626498	1	0.812913	CHEMBL177	CuI	MT	N/A	Amikacin	MIC nM	-1	2500	MIC (uM)	Mycobacterium tuberculosis	Praha 131	MT	Gram-	Respiratory	Bacillus subtilis	ATCC6633	N/A	None	None	0	t	0.151	0	0.03	0.032	MTD-0.1%-	0.0084784	0.0384648	-0.143	-0.15	-0.001	-0.01
47	CuOMTN/AAmikacin	-0.366026	24.8366	0.585802	0.409502	1	0.642401	CHEMBL177	CuO	MT	N/A	Amikacin	MIC nM	-1	2500	MIC (uM)	Mycobacterium tuberculosis	0.117	MT	Gram-	Respiratory	Bacillus sbtilis	MD	N/A	None	None	0	t	0.151	0	0.03	0.032	MTD-0.1%-	0.0084784	0.0384648	-0.147	-0.15	0	-0.01
48	CuOMTN/AAmikacin	-0.392	24.8107	0.559829	0.403236	1	0.636413	CHEMBL177	CuO	MT	N/A	Amikacin	MIC nM	-1	2500	MIC (uM)	Mycobacterium tuberculosis	H37Rv	MT	Gram-	Respiratory	Bacillus sbtilis	MD	N/A	None	None	0	t	0.151	0	0.03	0.032	MTD-0.1%-	0.0084784	0.0384648	-0.147	-0.15	0	-0.011
49	AgTYN/AAmikacin	3.74161	8.57676	1.06857	0.976833	0.999812	0.744325	CHEMBL177	Ag	TY	N/A	Amikacin	MIC ug.mL-1	-1	50	MBC (uM)	Salmonella enterica subsp. enterica serovar Typhimurium	n.d	TY	Gram	Systemic	Staphylococcus aureus	ATCC29213	Spherical	None	None	0	t	0.324	0	0.013	0.014	TYD-0.1%-	0.0063368	0.0195017	-0.147	-0.135	-0.001	-0.011
50	AuTYPDT/AChAmikacin	10.3032	15.1383	7.63016	0.999966	1	0.999515	CHEMBL177	Au	TY	PDT/ACh	Amikacin	IZ mm	1	5	MIC (uM)	Salmonella enterica subsp. enterica serovar Typhimurium	n.d	TY	Gram	Systemic	Klebsiella pneumoniae	MDR	Spherical	Double	Monomer	0	t	0.507	0	0.013	0.014	TYD-0.1%-	0.0063368	0.0195017	-0.143	-0.109	-0.001	-0.011
51	CuPNN/AAmikacin	0.655675	69.753	-2.97287	0.658288	1	0.0486667	CHEMBL177	Cu	PN	N/A	Amikacin	MIC ug.mL-1	-1	50	MBC (uM)	Streptococcus pneumoniae	ATCC49619	PN	Gram	Respiratory	Bacillus subtilis	ATCC6633	Spherical	None	None	0	t	0.324	0	0.072	0.074	PND-0.1%-	0.00745884	0.0793328	-0.147	-0.15	-0.001	-0.005
52	CuOPNN/AAmikacin	2.33772	71.435	-1.29083	0.911953	1	0.215713	CHEMBL177	CuO	PN	N/A	Amikacin	MIC ug.mL-1	-1	50	MIC (uM)	Streptococcus pneumoniae	ATCC13883	PN	Gram	Respiratory	Bacillus sbtilis	MD	N/A	None	None	0	v	0.424	0	0.072	0.074	PND-0.1%-	0.00745884	0.0793328	-0.147	-0.15	0	-0.009
53	AuSTPDT/MelAmikacin	11.2813	82.4365	7.32384	0.999987	1	0.999341	CHEMBL177	Au	ST	PDT/Mel	Amikacin	IZ mm	1	5	MIC (uM)	Streptococcus pyogenes	MTCC 389	ST	Gram	Respiratory	Escherichia coli	MDR	Spherical	Double	Monomer	0	t	0.507	0	0.074	0.075	STD-0.1%-	0.00734064	0.0812488	-0.143	-0.093	-0.001	-0.011
54	AuPAPDT/GAmoxacillin	9.16257	24.1173	9.2513	0.999895	1	0.999904	CHEMBL1082	Au	PA	PDT/G	Amoxacillin	IZ mm	1	5	MBC (uM)	Pseudomonas aeruginosa	n.d	PA	Gram-	Systemic	Pseudomonas aeruginosa	MDR	Spherical	Double	Monomer	1	t	0.388	0	0.021	0.022	PAD-0.1%-	0.00780707	0.0289235	-0.143	-0.102	-0.001	-0.001
55	AuPAPDT/GAmoxacillin	9.88096	24.8357	9.96969	0.999949	1	0.999953	CHEMBL1082	Au	PA	PDT/G	Amoxacillin	IZ mm	1	5	MIC (uM)	Pseudomonas aeruginosa	ATCC278533	PA	Gram-	Systemic	Pseudomonas aeruginosa	MDR	Spherical	Double	Monomer	1	t	0.507	0	0.021	0.022	PAD-0.1%-	0.00780707	0.0289235	-0.143	-0.102	-0.001	0.001
56	AgBSN/AAmoxacillin	4.31302	10.8563	2.9085	0.986784	0.999981	0.948265	CHEMBL1082	Ag	BS	N/A	Amoxacillin	IZ mm	1	5	MIC (uM)	Bacillus subtilis	ATCC6633	BS	Gram	NO	Bacillus subtilis	ATCC6633	Spherical	None	None	0	t	0.507	0	0.014	0.015	BSD-0.1%-	0.00694668	0.0210921	-0.147	-0.135	-0.001	-0.002
57	CuOBSN/AAmoxacillin	3.09664	9.6399	1.69212	0.956754	0.999935	0.844503	CHEMBL1082	CuO	BS	N/A	Amoxacillin	MIC ug.mL-1	-1	50	MIC (uM)	Bacillus subtilis	ATCC6633	BS	Gram	NO	Bacillus sbtilis	MD	N/A	None	None	0	t	0.424	0	0.014	0.015	BSD-0.1%-	0.00694668	0.0210921	-0.147	-0.15	0	-0.002
58	CuOBSN/AAmoxacillin	3.56147	10.1047	2.15695	0.972387	0.999959	0.896317	CHEMBL1082	CuO	BS	N/A	Amoxacillin	IZ mm	1	5	MIC (uM)	Bacillus subtilis	n.d	BS	Gram	NO	Bacillus sbtilis	MD	N/A	None	None	0	t	0.507	0	0.014	0.015	BSD-0.1%-	0.00694668	0.0210921	-0.147	-0.15	0	-0.002
59	AuPAPDT/GAmoxacillin	8.85609	23.8108	8.94482	0.999858	1	0.99987	CHEMBL1082	Au	PA	PDT/G	Amoxacillin	MIC ug.mL-1	-1	50	MBC (uM)	Pseudomonas aeruginosa	ATCC278533	PA	Gram-	Systemic	Pseudomonas aeruginosa	MDR	Spherical	Double	Monomer	0	v	0.324	0	0.021	0.022	PAD-0.1%-	0.00780707	0.0289235	-0.143	-0.102	-0.001	0.001
60	AuPAPDT/MelAmoxicillin	10.349	25.3037	10.4378	0.999968	1	0.999971	CHEMBL1082	Au	PA	PDT/Mel	Amoxicillin	IZ mm	1	5	MBC (uM)	Pseudomonas aeruginosa	n.d	PA	Gram-	Systemic	Pseudomonas aeruginosa	MDR	Spherical	Double	Monomer	1	v	0.388	0	0.021	0.022	PAD-0.1%-	0.00780707	0.0289235	-0.143	-0.093	-0.001	-0.001
61	AuPAPDT/AChAmoxicillin	8.23976	23.1945	8.32849	0.999736	1	0.999759	CHEMBL1082	Au	PA	PDT/ACh	Amoxicillin	IZ mm	1	5	MBC (uM)	Pseudomonas aeruginosa	n.d	PA	Gram-	Systemic	Pseudomonas aeruginosa	MDR	Spherical	Double	Monomer	1	t	0.388	0	0.021	0.022	PAD-0.1%-	0.00780707	0.0289235	-0.143	-0.109	-0.001	-0.001
62	AuPAPDT/CQAmoxicillin	8.60928	23.564	8.69801	0.999818	1	0.999833	CHEMBL1082	Au	PA	PDT/CQ	Amoxicillin	IZ mm	1	5	MBC (uM)	Pseudomonas aeruginosa	MTCC 2642	PA	Gram-	Systemic	Pseudomonas aeruginosa	MDR	Spherical	Double	Monomer	1	t	0.388	0	0.021	0.022	PAD-0.1%-	0.00780707	0.0289235	-0.143	-0.106	-0.001	-0.002
63	AuPAPDT/CQAmoxicillin	8.63525	23.59	8.72398	0.999822	1	0.999837	CHEMBL1082	Au	PA	PDT/CQ	Amoxicillin	IZ mm	1	5	MBC (uM)	Pseudomonas aeruginosa	n.d	PA	Gram-	Systemic	Pseudomonas aeruginosa	MDR	Spherical	Double	Monomer	1	t	0.388	0	0.021	0.022	PAD-0.1%-	0.00780707	0.0289235	-0.143	-0.106	-0.001	-0.001
64	ZnOPAN/AAmoxicillin	1.89347	16.8482	1.9822	0.869151	1	0.878915	CHEMBL1082	ZnO	PA	N/A	Amoxicillin	MIC50 ug.mL-1	-1	21.529	MBC (uM)	Pseudomonas aeruginosa	ATCC27863	PA	Gram-	Systemic	Pseudomonas aeruginosa	MD	N/A	None	None	1	t	0.373	0	0.021	0.022	PAD-0.1%-	0.00780707	0.0289235	-0.147	-0.15	0	0
65	AgPAMaltoseAmoxicillin	2.17909	17.1338	2.26782	0.898356	1	0.906177	CHEMBL1082	Ag	PA	Maltose	Amoxicillin	MIC ug.mL-1	-1	50	MIC (uM)	Pseudomonas aeruginosa	KG2505	PA	Gram-	Systemic	Pseudomonas aeruginosa	MD	Spherical	Single	Monomer	1	t	0.424	0	0.021	0.022	PAD-0.1%-	0.00780707	0.0289235	-0.147	-0.15	0	0
66	AgPAMaltoseAmoxicillin	2.17909	17.1338	2.26782	0.898356	1	0.906177	CHEMBL1082	Ag	PA	Maltose	Amoxicillin	MIC ug.mL-1	-1	50	MIC (uM)	Pseudomonas aeruginosa	MTCC-647	PA	Gram-	Systemic	Pseudomonas aeruginosa	MD	Spherical	Single	Monomer	1	v	0.424	0	0.021	0.022	PAD-0.1%-	0.00780707	0.0289235	-0.147	-0.15	0	0
67	AuPAPDT/MelAmoxicillin	10.4622	25.4169	10.551	0.999971	1	0.999974	CHEMBL1082	Au	PA	PDT/Mel	Amoxicillin	IZ mm	1	5	MIC (uM)	Pseudomonas aeruginosa	ATCC9027	PA	Gram-	Systemic	Pseudomonas aeruginosa	ATCC27853	Spherical	Double	Monomer	1	t	0.507	0	0.021	0.022	PAD-0.1%-	0.00780707	0.0289235	-0.144	-0.093	-0.001	-0.002
68	AuPAPDT/CQAmoxicillin	8.74844	23.7031	8.83717	0.999841	1	0.999855	CHEMBL1082	Au	PA	PDT/CQ	Amoxicillin	IZ mm	1	5	MIC (uM)	Pseudomonas aeruginosa	ATCC9027	PA	Gram-	Systemic	Pseudomonas aeruginosa	ATCC27853	Spherical	Double	Monomer	1	t	0.507	0	0.021	0.022	PAD-0.1%-	0.00780707	0.0289235	-0.144	-0.106	-0.001	-0.002
69	AuPAPDT/CQAmoxicillin	8.30958	23.2643	8.39831	0.999754	1	0.999775	CHEMBL1082	Au	PA	PDT/CQ	Amoxicillin	MIC ug.mL-1	-1	50	MIC (uM)	Pseudomonas aeruginosa	n.d	PA	Gram-	Systemic	Pseudomonas aeruginosa	ATCC27853	Spherical	Double	Monomer	1	t	0.424	0	0.021	0.022	PAD-0.1%-	0.00780707	0.0289235	-0.144	-0.106	-0.001	-0.001
70	AuPAPDT/DMBAmoxicillin	6.59579	21.5505	6.68453	0.998636	1	0.998751	CHEMBL1082	Au	PA	PDT/DMB	Amoxicillin	MIC ug.mL-1	-1	50	MIC (uM)	Pseudomonas aeruginosa	n.d	PA	Gram-	Systemic	Pseudomonas aeruginosa	ATCC27853	Spherical	Double	Monomer	1	t	0.424	0	0.021	0.022	PAD-0.1%-	0.00780707	0.0289235	-0.144	-0.119	-0.001	-0.001
71	AuPAPDT/CPBAmoxicillin	8.90621	23.8609	8.99494	0.999864	1	0.999876	CHEMBL1082	Au	PA	PDT/CPB	Amoxicillin	IZ mm	1	5	MIC (uM)	Pseudomonas aeruginosa	MTCC 1688	PA	Gram-	Systemic	Pseudomonas aeruginosa	MDR	Spherical	Double	Monomer	1	v	0.507	0	0.021	0.022	PAD-0.1%-	0.00780707	0.0289235	-0.143	-0.109	-0.001	-0.001
72	AgPAMaltoseAmoxicillin	2.50908	17.4638	2.59781	0.924776	1	0.93072	CHEMBL1082	Ag	PA	Maltose	Amoxicillin	MIC ug.mL-1	-1	50	MIC (uM)	Pseudomonas aeruginosa	n.d	PA	Gram-	Systemic	Pseudomonas aeruginosa	ATCC27853	Spherical	Single	Monomer	1	t	0.424	0	0.021	0.022	PAD-0.1%-	0.00780707	0.0289235	-0.144	-0.15	-0.001	-0.001
73	AuPAPDT/AChAmoxicillin	7.91409	22.8688	8.00282	0.999635	1	0.999666	CHEMBL1082	Au	PA	PDT/ACh	Amoxicillin	MIC ug.mL-1	-1	50	MIC (uM)	Pseudomonas aeruginosa	n.d	PA	Gram-	Systemic	Pseudomonas aeruginosa	ATCC27853	Spherical	Double	Monomer	1	v	0.424	0	0.021	0.022	PAD-0.1%-	0.00780707	0.0289235	-0.144	-0.109	-0.001	-0.001
74	AuPAPDT/CPBAmoxicillin	7.91409	22.8688	8.00282	0.999635	1	0.999666	CHEMBL1082	Au	PA	PDT/CPB	Amoxicillin	MIC ug.mL-1	-1	50	MIC (uM)	Pseudomonas aeruginosa	n.d	PA	Gram-	Systemic	Pseudomonas aeruginosa	ATCC27853	Spherical	Double	Monomer	1	t	0.424	0	0.021	0.022	PAD-0.1%-	0.00780707	0.0289235	-0.144	-0.109	-0.001	-0.001
75	AgPALactoseAmoxicillin	2.12714	17.0819	2.21587	0.893513	1	0.901666	CHEMBL1082	Ag	PA	Lactose	Amoxicillin	MIC ug.mL-1	-1	50	MIC (uM)	Pseudomonas aeruginosa	ATCC27853	PA	Gram-	Systemic	Pseudomonas aeruginosa	MD	Spherical	Single	Monomer	1	t	0.424	0	0.021	0.022	PAD-0.1%-	0.00780707	0.0289235	-0.147	-0.15	0	-0.002
76	AgPALactoseAmoxicillin	2.64392	17.5986	2.73265	0.933635	1	0.938926	CHEMBL1082	Ag	PA	Lactose	Amoxicillin	IZ mm	1	5	MIC (uM)	Pseudomonas aeruginosa	MTCC-647	PA	Gram-	Systemic	Pseudomonas aeruginosa	MD	Spherical	Single	Monomer	1	v	0.507	0	0.021	0.022	PAD-0.1%-	0.00780707	0.0289235	-0.147	-0.15	0	0
77	AgPALactoseAmoxicillin	2.48311	17.4378	2.57184	0.922949	1	0.929027	CHEMBL1082	Ag	PA	Lactose	Amoxicillin	MIC ug.mL-1	-1	50	MIC (uM)	Pseudomonas aeruginosa	MTCC 2642	PA	Gram-	Systemic	Pseudomonas aeruginosa	ATCC27853	Spherical	Single	Monomer	1	t	0.424	0	0.021	0.022	PAD-0.1%-	0.00780707	0.0289235	-0.144	-0.15	-0.001	-0.002
78	AgPAGlucoseAmoxicillin	2.12714	17.0819	2.21587	0.893513	1	0.901666	CHEMBL1082	Ag	PA	Glucose	Amoxicillin	MIC ug.mL-1	-1	50	MIC (uM)	Pseudomonas aeruginosa	ATCC27853	PA	Gram-	Systemic	Pseudomonas aeruginosa	MD	Spherical	Single	Monomer	1	t	0.424	0	0.021	0.022	PAD-0.1%-	0.00780707	0.0289235	-0.147	-0.15	0	-0.002
79	AgPAGlucoseAmoxicillin	2.17909	17.1338	2.26782	0.898356	1	0.906177	CHEMBL1082	Ag	PA	Glucose	Amoxicillin	MIC ug.mL-1	-1	50	MIC (uM)	Pseudomonas aeruginosa	KG2505	PA	Gram-	Systemic	Pseudomonas aeruginosa	MD	Spherical	Single	Monomer	1	v	0.424	0	0.021	0.022	PAD-0.1%-	0.00780707	0.0289235	-0.147	-0.15	0	0
80	AuPAPDTAmoxicillin	4.94402	19.8987	5.03275	0.992925	1	0.993521	CHEMBL1082	Au	PA	PDT	Amoxicillin	IZ mm	1	5	MBC (uM)	Pseudomonas aeruginosa	n.d	PA	Gram-	Systemic	Pseudomonas aeruginosa	MDR	Spherical	Single	Monomer	1	t	0.388	0	0.021	0.022	PAD-0.1%-	0.00780707	0.0289235	-0.143	-0.134	-0.001	-0.001
81	ZnOBSN/AAmoxicillin	2.89502	9.43828	1.49051	0.9476	0.99992	0.816154	CHEMBL1082	ZnO	BS	N/A	Amoxicillin	IZ mm	1	5	MBC (uM)	Bacillus subtilis	ATCC6633	BS	Gram	NO	Bacillus sbtilis	MD	N/A	None	None	0	t	0.388	0	0.014	0.015	BSD-0.1%-	0.00694668	0.0210921	-0.147	-0.15	0	-0.002
82	ZnOBSN/AAmoxicillin	2.5366	9.07985	1.13208	0.926668	0.999886	0.756222	CHEMBL1082	ZnO	BS	N/A	Amoxicillin	MIC ug.mL-1	-1	50	MBC (uM)	Bacillus subtilis	NCTC 2116	BS	Gram	NO	Bacillus sbtilis	MD	N/A	None	None	0	t	0.324	0	0.014	0.015	BSD-0.1%-	0.00694668	0.0210921	-0.147	-0.15	0	-0.002
83	CuOBSN/AAmoxicillin	2.5366	9.07985	1.13208	0.926668	0.999886	0.756222	CHEMBL1082	CuO	BS	N/A	Amoxicillin	MIC ug.mL-1	-1	50	MBC (uM)	Bacillus subtilis	ATCC25923	BS	Gram	NO	Bacillus sbtilis	MD	N/A	None	None	0	v	0.324	0	0.014	0.015	BSD-0.1%-	0.00694668	0.0210921	-0.147	-0.15	0	-0.002
84	CuOBSN/AAmoxicillin	2.89502	9.43828	1.49051	0.9476	0.99992	0.816154	CHEMBL1082	CuO	BS	N/A	Amoxicillin	IZ mm	1	5	MBC (uM)	Bacillus subtilis	n.d	BS	Gram	NO	Bacillus sbtilis	MD	N/A	None	None	0	t	0.388	0	0.014	0.015	BSD-0.1%-	0.00694668	0.0210921	-0.147	-0.15	0	-0.002
85	CuOBSN/AAmoxicillin	2.5366	9.07985	1.13208	0.926668	0.999886	0.756222	CHEMBL1082	CuO	BS	N/A	Amoxicillin	MIC ug.mL-1	-1	50	MBC (uM)	Bacillus subtilis	n.d	BS	Gram	NO	Bacillus sbtilis	MD	N/A	None	None	0	v	0.324	0	0.014	0.015	BSD-0.1%-	0.00694668	0.0210921	-0.147	-0.15	0	-0.002
86	CuIBSN/AAmoxicillin	3.77827	10.3215	2.37375	0.977649	0.999967	0.914804	CHEMBL1082	CuI	BS	N/A	Amoxicillin	IZ mm	1	5	MBC (uM)	Bacillus subtilis	MTCC 441	BS	Gram	NO	Bacillus subtilis	ATCC6633	N/A	None	None	0	t	0.388	0	0.014	0.015	BSD-0.1%-	0.00694668	0.0210921	-0.143	-0.15	-0.001	-0.002
87	CuOBSN/AAmoxicillin	2.5366	9.07985	1.13208	0.926668	0.999886	0.756222	CHEMBL1082	CuO	BS	N/A	Amoxicillin	MIC ug.mL-1	-1	50	MBC (uM)	Bacillus subtilis	n.d	BS	Gram	NO	Bacillus sbtilis	MD	N/A	None	None	0	t	0.324	0	0.014	0.015	BSD-0.1%-	0.00694668	0.0210921	-0.147	-0.15	0	-0.002
88	CuOBSN/AAmoxicillin	2.5366	9.07985	1.13208	0.926668	0.999886	0.756222	CHEMBL1082	CuO	BS	N/A	Amoxicillin	MIC ug.mL-1	-1	50	MBC (uM)	Bacillus subtilis	ATCC6051	BS	Gram	NO	Bacillus sbtilis	MD	N/A	None	None	0	t	0.324	0	0.014	0.015	BSD-0.1%-	0.00694668	0.0210921	-0.147	-0.15	0	-0.002
89	CuOBSN/AAmoxicillin	2.5366	9.07985	1.13208	0.926668	0.999886	0.756222	CHEMBL1082	CuO	BS	N/A	Amoxicillin	MIC ug.mL-1	-1	50	MBC (uM)	Bacillus subtilis	n.d	BS	Gram	NO	Bacillus sbtilis	MD	N/A	None	None	0	v	0.324	0	0.014	0.015	BSD-0.1%-	0.00694668	0.0210921	-0.147	-0.15	0	-0.002
90	CuOBSN/AAmoxicillin	2.89502	9.43828	1.49051	0.9476	0.99992	0.816154	CHEMBL1082	CuO	BS	N/A	Amoxicillin	IZ mm	1	5	MBC (uM)	Bacillus subtilis	n.d	BS	Gram	NO	Bacillus sbtilis	MD	N/A	None	None	0	t	0.388	0	0.014	0.015	BSD-0.1%-	0.00694668	0.0210921	-0.147	-0.15	0	-0.002
91	CuOBSN/AAmoxicillin	2.51062	9.05388	1.10611	0.924883	0.999883	0.751402	CHEMBL1082	CuO	BS	N/A	Amoxicillin	MIC ug.mL-1	-1	50	MBC (uM)	Bacillus subtilis	UC564	BS	Gram	NO	Bacillus sbtilis	MD	N/A	None	None	0	t	0.324	0	0.014	0.015	BSD-0.1%-	0.00694668	0.0210921	-0.147	-0.15	0	-0.003
92	CuBSN/AAmoxicillin	1.84477	8.38803	0.440251	0.863512	0.999772	0.608319	CHEMBL1082	Cu	BS	N/A	Amoxicillin	MIC ug.mL-1	-1	50	MIC (uM)	Bacillus subtilis	MTCC 2451	BS	Gram	NO	Bacillus subtilis	ATCC6633	Spherical	None	None	0	t	0.424	0	0.014	0.015	BSD-0.1%-	0.00694668	0.0210921	-0.147	-0.15	-0.001	-0.003
93	AgBSN/AAmoxicillin	4.31302	10.8563	2.9085	0.986784	0.999981	0.948265	CHEMBL1082	Ag	BS	N/A	Amoxicillin	IZ mm	1	5	MIC (uM)	Bacillus subtilis	ATCC25923	BS	Gram	NO	Bacillus subtilis	ATCC6633	Spherical	None	None	0	v	0.507	0	0.014	0.015	BSD-0.1%-	0.00694668	0.0210921	-0.147	-0.135	-0.001	-0.002
94	AgBSN/AAmoxicillin	3.82221	10.3655	2.41769	0.978589	0.999968	0.918167	CHEMBL1082	Ag	BS	N/A	Amoxicillin	MIC ug.mL-1	-1	50	MIC (uM)	Bacillus subtilis	MTCC 2451	BS	Gram	NO	Bacillus subtilis	ATCC6633	Spherical	None	None	0	t	0.424	0	0.014	0.015	BSD-0.1%-	0.00694668	0.0210921	-0.147	-0.135	-0.001	-0.003
95	CuOBSN/AAmoxicillin	3.56147	10.1047	2.15695	0.972387	0.999959	0.896317	CHEMBL1082	CuO	BS	N/A	Amoxicillin	IZ mm	1	5	MIC (uM)	Bacillus subtilis	n.d	BS	Gram	NO	Bacillus sbtilis	MD	N/A	None	None	0	t	0.507	0	0.014	0.015	BSD-0.1%-	0.00694668	0.0210921	-0.147	-0.15	0	-0.002
96	CuOBSN/AAmoxicillin	3.45506	9.99832	2.05055	0.969382	0.999955	0.886003	CHEMBL1082	CuO	BS	N/A	Amoxicillin	MIC50 ug.mL-1	-1	21.529	MIC (uM)	Bacillus subtilis	ATCC25923	BS	Gram	NO	Bacillus sbtilis	MD	N/A	None	None	0	v	0.488	0	0.014	0.015	BSD-0.1%-	0.00694668	0.0210921	-0.147	-0.15	0	-0.002
97	CuIBSN/AAmoxicillin	4.44472	10.988	3.0402	0.988396	0.999983	0.954358	CHEMBL1082	CuI	BS	N/A	Amoxicillin	IZ mm	1	5	MIC (uM)	Bacillus subtilis	ATCC6633	BS	Gram	NO	Bacillus subtilis	ATCC6633	N/A	None	None	0	t	0.507	0	0.014	0.015	BSD-0.1%-	0.00694668	0.0210921	-0.143	-0.15	-0.001	-0.002
98	CuOBSN/AAmoxicillin	3.09664	9.6399	1.69212	0.956754	0.999935	0.844503	CHEMBL1082	CuO	BS	N/A	Amoxicillin	MIC ug.mL-1	-1	50	MIC (uM)	Bacillus subtilis	ATCC6633	BS	Gram	NO	Bacillus sbtilis	MD	N/A	None	None	0	v	0.424	0	0.014	0.015	BSD-0.1%-	0.00694668	0.0210921	-0.147	-0.15	0	-0.002
99	CuOBSN/AAmoxicillin	3.56147	10.1047	2.15695	0.972387	0.999959	0.896317	CHEMBL1082	CuO	BS	N/A	Amoxicillin	IZ mm	1	5	MIC (uM)	Bacillus subtilis	n.d	BS	Gram	NO	Bacillus sbtilis	MD	N/A	None	None	0	t	0.507	0	0.014	0.015	BSD-0.1%-	0.00694668	0.0210921	-0.147	-0.15	0	-0.002
100	CuOBSN/AAmoxicillin	3.09664	9.6399	1.69212	0.956754	0.999935	0.844503	CHEMBL1082	CuO	BS	N/A	Amoxicillin	MIC ug.mL-1	-1	50	MIC (uM)	Bacillus subtilis	ATCC6633	BS	Gram	NO	Bacillus sbtilis	MD	N/A	None	None	0	t	0.424	0	0.014	0.015	BSD-0.1%-	0.00694668	0.0210921	-0.147	-0.15	0	-0.002
101	CuOBSN/AAmoxicillin	3.5355	10.0788	2.13098	0.971681	0.999958	0.893878	CHEMBL1082	CuO	BS	N/A	Amoxicillin	IZ mm	1	5	MIC (uM)	Bacillus subtilis	MTCC 2451	BS	Gram	NO	Bacillus sbtilis	MD	N/A	None	None	0	t	0.507	0	0.014	0.015	BSD-0.1%-	0.00694668	0.0210921	-0.147	-0.15	0	-0.003
102	AuCJPDT/CQAmoxicillin	9.64376	85.3701	3.83393	0.999935	1	0.978833	CHEMBL1082	Au	CJ	PDT/CQ	Amoxicillin	MIC ug.mL-1	-1	50	MBC (uM)	Campylobacter jejuni	n.d	CJ	Gram-	GIT	Staphylococcus epidermidis	ATCC12228	Spherical	Double	Monomer	0	t	0.324	0	0.079	0.081	CJD-0.1%-	0.00664007	0.0855047	-0.143	-0.106	-0.001	0.001
103	AuCJPDT/CPBAmoxicillin	9.24827	84.9746	3.43844	0.999904	1	0.968885	CHEMBL1082	Au	CJ	PDT/CPB	Amoxicillin	MIC ug.mL-1	-1	50	MBC (uM)	Campylobacter jejuni	n.d	CJ	Gram-	GIT	Staphylococcus epidermidis	ATCC12228	Spherical	Double	Monomer	0	t	0.324	0	0.079	0.081	CJD-0.1%-	0.00664007	0.0855047	-0.143	-0.109	-0.001	0.001
104	ZnOEFN/AAmoxicillin	2.03957	71.8504	-2.39444	0.884889	1	0.0835979	CHEMBL1082	ZnO	EF	N/A	Amoxicillin	log10CFU/ml -	-1	1.979	MBC (uM)	Enterococcus faecalis	JH2-2	EF	Gram	GIT	Bacillus sbtilis	MD	N/A	None	None	0	t	0.259	0	0.073	0.075	EFD-0.1%-	0.00711082	0.0799971	-0.147	-0.15	0	0
105	ZnOEFN/AAmoxicillin	1.84355	71.6544	-2.59045	0.863368	1	0.0697555	CHEMBL1082	ZnO	EF	N/A	Amoxicillin	log10CFU/g -	-1	5.237	MBC (uM)	Enterococcus faecalis	JH2-2	EF	Gram	GIT	Bacillus sbtilis	MD	N/A	None	None	0	t	0.224	0	0.073	0.075	EFD-0.1%-	0.00711082	0.0799971	-0.147	-0.15	0	0
106	ZnOEFN/AAmoxicillin	2.65204	72.4629	-1.78196	0.934137	1	0.144061	CHEMBL1082	ZnO	EF	N/A	Amoxicillin	MIC50 ug.mL-1	-1	21.529	MBC (uM)	Enterococcus faecalis	n.d	EF	Gram	GIT	Bacillus sbtilis	MD	N/A	None	None	0	t	0.373	0	0.073	0.075	EFD-0.1%-	0.00711082	0.0799971	-0.147	-0.15	0	-0.001
107	ZnOEFN/AAmoxicillin	1.20714	71.018	-3.22687	0.769792	1	0.038167	CHEMBL1082	ZnO	EF	N/A	Amoxicillin	MIC nM	-1	2500	MBC (uM)	Enterococcus faecalis	n.d	EF	Gram	GIT	Bacillus sbtilis	MD	N/A	None	None	0	v	0.115	0	0.073	0.075	EFD-0.1%-	0.00711082	0.0799971	-0.147	-0.15	0	-0.001
108	CuOEFN/AAmoxicillin	2.03957	71.8504	-2.39444	0.884889	1	0.0835979	CHEMBL1082	CuO	EF	N/A	Amoxicillin	log10CFU/ml -	-1	1.979	MBC (uM)	Enterococcus faecalis	JH2-2	EF	Gram	GIT	Bacillus sbtilis	MD	N/A	None	None	0	t	0.259	0	0.073	0.075	EFD-0.1%-	0.00711082	0.0799971	-0.147	-0.15	0	0
109	CuOEFN/AAmoxicillin	1.40672	71.2176	-3.02728	0.803248	1	0.0462084	CHEMBL1082	CuO	EF	N/A	Amoxicillin	Activity %	1	70	MBC (uM)	Enterococcus faecalis	JH2-2	EF	Gram	GIT	Bacillus sbtilis	MD	N/A	None	None	0	t	0.146	0	0.073	0.075	EFD-0.1%-	0.00711082	0.0799971	-0.147	-0.15	0	0
110	CuOEFN/AAmoxicillin	2.65204	72.4629	-1.78196	0.934137	1	0.144061	CHEMBL1082	CuO	EF	N/A	Amoxicillin	MIC50 ug.mL-1	-1	21.529	MBC (uM)	Enterococcus faecalis	n.d	EF	Gram	GIT	Bacillus sbtilis	MD	N/A	None	None	0	t	0.373	0	0.073	0.075	EFD-0.1%-	0.00711082	0.0799971	-0.147	-0.15	0	-0.001
111	Fe2O3EFN/AAmoxicillin	2.03957	71.8504	-2.39444	0.884889	1	0.0835979	CHEMBL1082	Fe2O3	EF	N/A	Amoxicillin	log10CFU/ml -	-1	1.979	MBC (uM)	Enterococcus faecalis	JH2-2	EF	Gram	GIT	Bacillus sbtilis	MD	N/A	None	None	0	t	0.259	0	0.073	0.075	EFD-0.1%-	0.00711082	0.0799971	-0.147	-0.15	0	0
112	AgEFN/AAmoxicillin	3.15514	72.966	-1.27886	0.959111	1	0.217744	CHEMBL1082	Ag	EF	N/A	Amoxicillin	MIC ug.mL-1	-1	50	MBC (uM)	Enterococcus faecalis	JH2-2	EF	Gram	GIT	Bacillus subtilis	ATCC6633	Spherical	None	None	0	t	0.324	0	0.073	0.075	EFD-0.1%-	0.00711082	0.0799971	-0.147	-0.135	-0.001	0
113	AgEFN/AAmoxicillin	3.20555	73.0164	-1.22846	0.961042	1	0.226451	CHEMBL1082	Ag	EF	N/A	Amoxicillin	MBC ug ml-1	-1	117.213	MBC (uM)	Enterococcus faecalis	JH2-2	EF	Gram	GIT	Bacillus subtilis	ATCC6633	Spherical	None	None	0	t	0.333	0	0.073	0.075	EFD-0.1%-	0.00711082	0.0799971	-0.147	-0.135	-0.001	0
114	AgEFN/AAmoxicillin	2.79112	72.602	-1.64289	0.942194	1	0.162072	CHEMBL1082	Ag	EF	N/A	Amoxicillin	log10CFU/ml -	-1	1.979	MBC (uM)	Enterococcus faecalis	JH2-2	EF	Gram	GIT	Bacillus subtilis	ATCC6633	Spherical	None	None	0	v	0.259	0	0.073	0.075	EFD-0.1%-	0.00711082	0.0799971	-0.147	-0.135	-0.001	0
115	AgEFN/AAmoxicillin	3.12917	72.94	-1.30484	0.95808	1	0.213352	CHEMBL1082	Ag	EF	N/A	Amoxicillin	MIC ug.mL-1	-1	50	MBC (uM)	Enterococcus faecalis	n.d	EF	Gram	GIT	Bacillus subtilis	ATCC6633	Spherical	None	None	0	t	0.324	0	0.073	0.075	EFD-0.1%-	0.00711082	0.0799971	-0.147	-0.135	-0.001	-0.001
116	CuOEFN/AAmoxicillin	2.03957	71.8504	-2.39444	0.884889	1	0.0835979	CHEMBL1082	CuO	EF	N/A	Amoxicillin	log10CFU/ml -	-1	1.979	MBC (uM)	Enterococcus faecalis	JH2-2	EF	Gram	GIT	Bacillus sbtilis	MD	N/A	None	None	0	t	0.259	0	0.073	0.075	EFD-0.1%-	0.00711082	0.0799971	-0.147	-0.15	0	0
117	CuEFN/AAmoxicillin	1.1777	70.9885	-3.25631	0.764534	1	0.0371009	CHEMBL1082	Cu	EF	N/A	Amoxicillin	MIC ug.mL-1	-1	50	MBC (uM)	Enterococcus faecalis	JH2-2	EF	Gram	GIT	Bacillus subtilis	ATCC6633	Spherical	None	None	0	t	0.324	0	0.073	0.075	EFD-0.1%-	0.00711082	0.0799971	-0.147	-0.15	-0.001	0
118	CuEFN/AAmoxicillin	1.2281	71.0389	-3.2059	0.773486	1	0.0389442	CHEMBL1082	Cu	EF	N/A	Amoxicillin	MBC ug ml-1	-1	117.213	MBC (uM)	Enterococcus faecalis	JH2-2	EF	Gram	GIT	Bacillus subtilis	ATCC6633	Spherical	None	None	0	v	0.333	0	0.073	0.075	EFD-0.1%-	0.00711082	0.0799971	-0.147	-0.15	-0.001	0
119	CuEFN/AAmoxicillin	0.813673	70.6245	-3.62033	0.692892	1	0.0260756	CHEMBL1082	Cu	EF	N/A	Amoxicillin	log10CFU/ml -	-1	1.979	MBC (uM)	Enterococcus faecalis	JH2-2	EF	Gram	GIT	Bacillus subtilis	ATCC6633	Spherical	None	None	0	t	0.259	0	0.073	0.075	EFD-0.1%-	0.00711082	0.0799971	-0.147	-0.15	-0.001	0
120	CuEFN/AAmoxicillin	1.15173	70.9626	-3.28228	0.759826	1	0.0361841	CHEMBL1082	Cu	EF	N/A	Amoxicillin	MIC ug.mL-1	-1	50	MBC (uM)	Enterococcus faecalis	n.d	EF	Gram	GIT	Bacillus subtilis	ATCC6633	Spherical	None	None	0	t	0.324	0	0.073	0.075	EFD-0.1%-	0.00711082	0.0799971	-0.147	-0.15	-0.001	-0.001
121	CuOEFN/AAmoxicillin	2.03957	71.8504	-2.39444	0.884889	1	0.0835979	CHEMBL1082	CuO	EF	N/A	Amoxicillin	log10CFU/ml -	-1	1.979	MBC (uM)	Enterococcus faecalis	JH2-2	EF	Gram	GIT	Bacillus sbtilis	MD	N/A	None	None	0	v	0.259	0	0.073	0.075	EFD-0.1%-	0.00711082	0.0799971	-0.147	-0.15	0	0
122	CuIEFN/AAmoxicillin	3.18295	72.9938	-1.25106	0.960188	1	0.222517	CHEMBL1082	CuI	EF	N/A	Amoxicillin	MIC ug.mL-1	-1	50	MBC (uM)	Enterococcus faecalis	ATCC25912	EF	Gram	GIT	Bacillus subtilis	ATCC6633	N/A	None	None	0	t	0.324	0	0.073	0.075	EFD-0.1%-	0.00711082	0.0799971	-0.143	-0.15	-0.001	-0.004
123	CuIEFN/AAmoxicillin	2.92282	72.7337	-1.51119	0.948963	1	0.180763	CHEMBL1082	CuI	EF	N/A	Amoxicillin	log10CFU/ml -	-1	1.979	MBC (uM)	Enterococcus faecalis	JH2-2	EF	Gram	GIT	Bacillus subtilis	ATCC6633	N/A	None	None	0	t	0.259	0	0.073	0.075	EFD-0.1%-	0.00711082	0.0799971	-0.143	-0.15	-0.001	0
124	CuIEFN/AAmoxicillin	2.92282	72.7337	-1.51119	0.948963	1	0.180763	CHEMBL1082	CuI	EF	N/A	Amoxicillin	log10CFU/ml -	-1	1.979	MBC (uM)	Enterococcus faecalis	JH2-2	EF	Gram	GIT	Bacillus subtilis	ATCC6633	N/A	None	None	0	t	0.259	0	0.073	0.075	EFD-0.1%-	0.00711082	0.0799971	-0.143	-0.15	-0.001	0
125	CuOEFN/AAmoxicillin	2.03957	71.8504	-2.39444	0.884889	1	0.0835979	CHEMBL1082	CuO	EF	N/A	Amoxicillin	log10CFU/ml -	-1	1.979	MBC (uM)	Enterococcus faecalis	JH2-2	EF	Gram	GIT	Bacillus sbtilis	MD	N/A	None	None	0	t	0.259	0	0.073	0.075	EFD-0.1%-	0.00711082	0.0799971	-0.147	-0.15	0	0
126	CuOEFN/AAmoxicillin	2.49523	72.3061	-1.93878	0.923807	1	0.125782	CHEMBL1082	CuO	EF	N/A	Amoxicillin	MIC90 ug.mL-1	-1	34.891	MBC (uM)	Enterococcus faecalis	n.d	EF	Gram	GIT	Bacillus sbtilis	MD	N/A	None	None	0	t	0.345	0	0.073	0.075	EFD-0.1%-	0.00711082	0.0799971	-0.147	-0.15	0	-0.001
127	CuOEFN/AAmoxicillin	2.37762	72.1885	-2.05638	0.915105	1	0.113409	CHEMBL1082	CuO	EF	N/A	Amoxicillin	MIC ug.mL-1	-1	50	MBC (uM)	Enterococcus faecalis	isolate 1	EF	Gram	GIT	Bacillus sbtilis	MD	N/A	None	None	0	t	0.324	0	0.073	0.075	EFD-0.1%-	0.00711082	0.0799971	-0.147	-0.15	0	-0.001
128	CuOEFN/AAmoxicillin	2.32567	72.1365	-2.10833	0.910981	1	0.10829	CHEMBL1082	CuO	EF	N/A	Amoxicillin	MIC ug.mL-1	-1	50	MBC (uM)	Enterococcus faecalis	isolate 29212	EF	Gram	GIT	Bacillus sbtilis	MD	N/A	None	None	0	v	0.324	0	0.073	0.075	EFD-0.1%-	0.00711082	0.0799971	-0.147	-0.15	0	-0.003
129	CuOEFN/AAmoxicillin	0.82988	70.6407	-3.60413	0.696329	1	0.0264904	CHEMBL1082	CuO	EF	N/A	Amoxicillin	Ratio -	1	25.087	MBC (uM)	Enterococcus faecalis	JH2-2	EF	Gram	GIT	Bacillus sbtilis	MD	N/A	None	None	0	t	0.043	0	0.073	0.075	EFD-0.1%-	0.00711082	0.0799971	-0.147	-0.15	0	0
130	CuOEFN/AAmoxicillin	2.03957	71.8504	-2.39444	0.884889	1	0.0835979	CHEMBL1082	CuO	EF	N/A	Amoxicillin	log10CFU/ml -	-1	1.979	MBC (uM)	Enterococcus faecalis	JH2-2	EF	Gram	GIT	Bacillus sbtilis	MD	N/A	None	None	0	t	0.259	0	0.073	0.075	EFD-0.1%-	0.00711082	0.0799971	-0.147	-0.15	0	0
131	CuOEFN/AAmoxicillin	2.00239	71.8132	-2.43161	0.881048	1	0.0807937	CHEMBL1082	CuO	EF	N/A	Amoxicillin	MBC50 mg/L	-1	13.818	MBC (uM)	Enterococcus faecalis	n.d	EF	Gram	GIT	Bacillus sbtilis	MD	N/A	None	None	0	v	0.257	0	0.073	0.075	EFD-0.1%-	0.00711082	0.0799971	-0.147	-0.15	0	-0.001
132	CuEFN/AAmoxicillin	1.26171	71.0725	-3.1723	0.77932	1	0.0402215	CHEMBL1082	Cu	EF	N/A	Amoxicillin	log10CFU/ml -	-1	1.979	MIC (uM)	Enterococcus faecalis	JH2-2	EF	Gram	GIT	Bacillus subtilis	ATCC6633	Spherical	None	None	0	t	0.339	0	0.073	0.075	EFD-0.1%-	0.00711082	0.0799971	-0.147	-0.15	-0.001	0
133	CuEFN/AAmoxicillin	1.00409	70.8149	-3.42992	0.731861	1	0.0313734	CHEMBL1082	Cu	EF	N/A	Amoxicillin	log10CFU/g -	-1	5.237	MIC (uM)	Enterococcus faecalis	JH2-2	EF	Gram	GIT	Bacillus subtilis	ATCC6633	Spherical	None	None	0	t	0.293	0	0.073	0.075	EFD-0.1%-	0.00711082	0.0799971	-0.147	-0.15	-0.001	0
134	CuEFN/AAmoxicillin	1.71177	71.5226	-2.72224	0.847065	1	0.0616738	CHEMBL1082	Cu	EF	N/A	Amoxicillin	MIC ug.mL-1	-1	50	MIC (uM)	Enterococcus faecalis	n.d	EF	Gram	GIT	Bacillus subtilis	ATCC6633	Spherical	None	None	0	t	0.424	0	0.073	0.075	EFD-0.1%-	0.00711082	0.0799971	-0.147	-0.15	-0.001	-0.001
135	CuEFN/AAmoxicillin	1.22453	71.0354	-3.20947	0.77286	1	0.0388107	CHEMBL1082	Cu	EF	N/A	Amoxicillin	MBC90 mg/L	-1	50.303	MIC (uM)	Enterococcus faecalis	n.d	EF	Gram	GIT	Bacillus subtilis	ATCC6633	Spherical	None	None	0	v	0.337	0	0.073	0.075	EFD-0.1%-	0.00711082	0.0799971	-0.147	-0.15	-0.001	-0.001
136	AgEFN/AAmoxicillin	3.23915	73.05	-1.19486	0.962281	1	0.232391	CHEMBL1082	Ag	EF	N/A	Amoxicillin	log10CFU/ml -	-1	1.979	MIC (uM)	Enterococcus faecalis	JH2-2	EF	Gram	GIT	Bacillus subtilis	ATCC6633	Spherical	None	None	0	t	0.339	0	0.073	0.075	EFD-0.1%-	0.00711082	0.0799971	-0.147	-0.135	-0.001	0
137	AgEFN/AAmoxicillin	2.98153	72.7924	-1.45248	0.951733	1	0.189621	CHEMBL1082	Ag	EF	N/A	Amoxicillin	log10CFU/g -	-1	5.237	MIC (uM)	Enterococcus faecalis	JH2-2	EF	Gram	GIT	Bacillus subtilis	ATCC6633	Spherical	None	None	0	t	0.293	0	0.073	0.075	EFD-0.1%-	0.00711082	0.0799971	-0.147	-0.135	-0.001	0
138	AgEFN/AAmoxicillin	3.68921	73.5	-0.744795	0.975618	1	0.321956	CHEMBL1082	Ag	EF	N/A	Amoxicillin	MIC ug.mL-1	-1	50	MIC (uM)	Enterococcus faecalis	n.d	EF	Gram	GIT	Bacillus subtilis	ATCC6633	Spherical	None	None	0	t	0.424	0	0.073	0.075	EFD-0.1%-	0.00711082	0.0799971	-0.147	-0.135	-0.001	-0.001
139	AgEFN/AAmoxicillin	3.20197	73.0128	-1.23203	0.960909	1	0.225826	CHEMBL1082	Ag	EF	N/A	Amoxicillin	MBC90 mg/L	-1	50.303	MIC (uM)	Enterococcus faecalis	n.d	EF	Gram	GIT	Bacillus subtilis	ATCC6633	Spherical	None	None	0	t	0.337	0	0.073	0.075	EFD-0.1%-	0.00711082	0.0799971	-0.147	-0.135	-0.001	-0.001
140	CuOEFN/AAmoxicillin	0.908285	70.7191	-3.52572	0.712649	1	0.0285892	CHEMBL1082	CuO	EF	N/A	Amoxicillin	Ratio -	1	25.087	MIC (uM)	Enterococcus faecalis	JH2-2	EF	Gram	GIT	Bacillus sbtilis	MD	N/A	None	None	0	t	0.057	0	0.073	0.075	EFD-0.1%-	0.00711082	0.0799971	-0.147	-0.15	0	0
141	CuOEFN/AAmoxicillin	2.4876	72.2984	-1.9464	0.923268	1	0.124946	CHEMBL1082	CuO	EF	N/A	Amoxicillin	log10CFU/ml -	-1	1.979	MIC (uM)	Enterococcus faecalis	JH2-2	EF	Gram	GIT	Bacillus sbtilis	MD	N/A	None	None	0	v	0.339	0	0.073	0.075	EFD-0.1%-	0.00711082	0.0799971	-0.147	-0.15	0	0
142	CuOEFN/AAmoxicillin	3.09447	72.9053	-1.33953	0.956664	1	0.207587	CHEMBL1082	CuO	EF	N/A	Amoxicillin	MIC90 ug.mL-1	-1	34.891	MIC (uM)	Enterococcus faecalis	n.d	EF	Gram	GIT	Bacillus sbtilis	MD	N/A	None	None	0	t	0.452	0	0.073	0.075	EFD-0.1%-	0.00711082	0.0799971	-0.147	-0.15	0	-0.001
143	CuOEFN/AAmoxicillin	2.45043	72.2613	-1.98358	0.920593	1	0.120938	CHEMBL1082	CuO	EF	N/A	Amoxicillin	MBC50 mg/L	-1	13.818	MIC (uM)	Enterococcus faecalis	n.d	EF	Gram	GIT	Bacillus sbtilis	MD	N/A	None	None	0	t	0.337	0	0.073	0.075	EFD-0.1%-	0.00711082	0.0799971	-0.147	-0.15	0	-0.001
144	CuOEFN/AAmoxicillin	2.4876	72.2984	-1.9464	0.923268	1	0.124946	CHEMBL1082	CuO	EF	N/A	Amoxicillin	log10CFU/ml -	-1	1.979	MIC (uM)	Enterococcus faecalis	JH2-2	EF	Gram	GIT	Bacillus sbtilis	MD	N/A	None	None	0	t	0.339	0	0.073	0.075	EFD-0.1%-	0.00711082	0.0799971	-0.147	-0.15	0	0
145	CuOEFN/AAmoxicillin	3.09447	72.9053	-1.33953	0.956664	1	0.207587	CHEMBL1082	CuO	EF	N/A	Amoxicillin	MIC90 ug.mL-1	-1	34.891	MIC (uM)	Enterococcus faecalis	n.d	EF	Gram	GIT	Bacillus sbtilis	MD	N/A	None	None	0	t	0.452	0	0.073	0.075	EFD-0.1%-	0.00711082	0.0799971	-0.147	-0.15	0	-0.001
146	CuIEFN/AAmoxicillin	3.37085	73.1817	-1.06316	0.966781	1	0.256707	CHEMBL1082	CuI	EF	N/A	Amoxicillin	log10CFU/ml -	-1	1.979	MIC (uM)	Enterococcus faecalis	JH2-2	EF	Gram	GIT	Bacillus subtilis	ATCC6633	N/A	None	None	0	t	0.339	0	0.073	0.075	EFD-0.1%-	0.00711082	0.0799971	-0.143	-0.15	-0.001	0
147	CuIEFN/AAmoxicillin	3.11323	72.9241	-1.32077	0.957435	1	0.210689	CHEMBL1082	CuI	EF	N/A	Amoxicillin	log10CFU/g -	-1	5.237	MIC (uM)	Enterococcus faecalis	JH2-2	EF	Gram	GIT	Bacillus subtilis	ATCC6633	N/A	None	None	0	t	0.293	0	0.073	0.075	EFD-0.1%-	0.00711082	0.0799971	-0.143	-0.15	-0.001	0
148	CuIEFN/AAmoxicillin	3.82091	73.6318	-0.613095	0.978562	1	0.351354	CHEMBL1082	CuI	EF	N/A	Amoxicillin	MIC ug.mL-1	-1	50	MIC (uM)	Enterococcus faecalis	n.d	EF	Gram	GIT	Bacillus subtilis	ATCC6633	N/A	None	None	0	t	0.424	0	0.073	0.075	EFD-0.1%-	0.00711082	0.0799971	-0.143	-0.15	-0.001	-0.001
149	CuIEFN/AAmoxicillin	2.292	72.1028	-2.14201	0.908212	1	0.105081	CHEMBL1082	CuI	EF	N/A	Amoxicillin	MIC nM	-1	2500	MIC (uM)	Enterococcus faecalis	n.d	EF	Gram	GIT	Bacillus subtilis	ATCC6633	N/A	None	None	0	v	0.151	0	0.073	0.075	EFD-0.1%-	0.00711082	0.0799971	-0.143	-0.15	-0.001	-0.001
150	CuOEFN/AAmoxicillin	2.96364	72.7745	-1.47037	0.950904	1	0.186886	CHEMBL1082	CuO	EF	N/A	Amoxicillin	MIC ug.mL-1	-1	50	MIC (uM)	Enterococcus faecalis	JH2-2	EF	Gram	GIT	Bacillus sbtilis	MD	N/A	None	None	0	t	0.424	0	0.073	0.075	EFD-0.1%-	0.00711082	0.0799971	-0.147	-0.15	0	0
151	CuOEFN/AAmoxicillin	2.4876	72.2984	-1.9464	0.923268	1	0.124946	CHEMBL1082	CuO	EF	N/A	Amoxicillin	log10CFU/ml -	-1	1.979	MIC (uM)	Enterococcus faecalis	JH2-2	EF	Gram	GIT	Bacillus sbtilis	MD	N/A	None	None	0	v	0.339	0	0.073	0.075	EFD-0.1%-	0.00711082	0.0799971	-0.147	-0.15	0	0
152	CuOEFN/AAmoxicillin	3.09447	72.9053	-1.33953	0.956664	1	0.207587	CHEMBL1082	CuO	EF	N/A	Amoxicillin	MIC90 ug.mL-1	-1	34.891	MIC (uM)	Enterococcus faecalis	n.d	EF	Gram	GIT	Bacillus sbtilis	MD	N/A	None	None	0	t	0.452	0	0.073	0.075	EFD-0.1%-	0.00711082	0.0799971	-0.147	-0.15	0	-0.001
153	CuOEFN/AAmoxicillin	2.93766	72.7485	-1.49634	0.949677	1	0.182972	CHEMBL1082	CuO	EF	N/A	Amoxicillin	MIC ug.mL-1	-1	50	MIC (uM)	Enterococcus faecalis	n.d	EF	Gram	GIT	Bacillus sbtilis	MD	N/A	None	None	0	t	0.424	0	0.073	0.075	EFD-0.1%-	0.00711082	0.0799971	-0.147	-0.15	0	-0.001
154	CuOEFN/AAmoxicillin	2.96364	72.7745	-1.47037	0.950904	1	0.186886	CHEMBL1082	CuO	EF	N/A	Amoxicillin	MIC ug.mL-1	-1	50	MIC (uM)	Enterococcus faecalis	JH2-2	EF	Gram	GIT	Bacillus sbtilis	MD	N/A	None	None	0	t	0.424	0	0.073	0.075	EFD-0.1%-	0.00711082	0.0799971	-0.147	-0.15	0	0
155	CuOEFN/AAmoxicillin	2.4876	72.2984	-1.9464	0.923268	1	0.124946	CHEMBL1082	CuO	EF	N/A	Amoxicillin	log10CFU/ml -	-1	1.979	MIC (uM)	Enterococcus faecalis	JH2-2	EF	Gram	GIT	Bacillus sbtilis	MD	N/A	None	None	0	v	0.339	0	0.073	0.075	EFD-0.1%-	0.00711082	0.0799971	-0.147	-0.15	0	0
156	CuOEFN/AAmoxicillin	2.93766	72.7485	-1.49634	0.949677	1	0.182972	CHEMBL1082	CuO	EF	N/A	Amoxicillin	MIC ug.mL-1	-1	50	MIC (uM)	Enterococcus faecalis	n.d	EF	Gram	GIT	Bacillus sbtilis	MD	N/A	None	None	0	t	0.424	0	0.073	0.075	EFD-0.1%-	0.00711082	0.0799971	-0.147	-0.15	0	-0.001
157	ZnOHIN/AAmoxicillin	1.02983	43.3603	1.03077	0.736883	1	0.737065	CHEMBL1082	ZnO	HI	N/A	Amoxicillin	MIC90 ug.mL-1	-1	34.891	MBC (uM)	Haemophilus influenzae	n.d	HI	Gram-	Systemic	Bacillus sbtilis	MD	N/A	None	None	0	t	0.345	0	0.046	0.047	HID-0.1%-	0.00843435	0.0544116	-0.147	-0.15	0	0
158	ZnOHIN/AAmoxicillin	1.18664	43.5171	1.18758	0.76614	1	0.766308	CHEMBL1082	ZnO	HI	N/A	Amoxicillin	MIC50 ug.mL-1	-1	21.529	MBC (uM)	Haemophilus influenzae	n.d	HI	Gram-	Systemic	Bacillus sbtilis	MD	N/A	None	None	0	v	0.373	0	0.046	0.047	HID-0.1%-	0.00843435	0.0544116	-0.147	-0.15	0	0
159	ZnOHIN/AAmoxicillin	0.91222	43.2427	0.913162	0.713454	1	0.713647	CHEMBL1082	ZnO	HI	N/A	Amoxicillin	MIC ug.mL-1	-1	50	MBC (uM)	Haemophilus influenzae	n.d	HI	Gram-	Systemic	Bacillus sbtilis	MD	N/A	None	None	0	t	0.324	0	0.046	0.047	HID-0.1%-	0.00843435	0.0544116	-0.147	-0.15	0	0
160	ZnOHIN/AAmoxicillin	0.91222	43.2427	0.913162	0.713454	1	0.713647	CHEMBL1082	ZnO	HI	N/A	Amoxicillin	MIC ug.mL-1	-1	50	MBC (uM)	Haemophilus influenzae	n.d	HI	Gram-	Systemic	Bacillus sbtilis	MD	N/A	None	None	0	t	0.324	0	0.046	0.047	HID-0.1%-	0.00843435	0.0544116	-0.147	-0.15	0	0
161	ZnOHIN/AAmoxicillin	-0.0846524	42.2458	-0.0837109	0.47885	1	0.479084	CHEMBL1082	ZnO	HI	N/A	Amoxicillin	Activity %	1	70	MBC (uM)	Haemophilus influenzae	n.d	HI	Gram-	Systemic	Bacillus sbtilis	MD	N/A	None	None	0	v	0.146	0	0.046	0.047	HID-0.1%-	0.00843435	0.0544116	-0.147	-0.15	0	0
162	CuOHIN/AAmoxicillin	1.02983	43.3603	1.03077	0.736883	1	0.737065	CHEMBL1082	CuO	HI	N/A	Amoxicillin	MIC90 ug.mL-1	-1	34.891	MBC (uM)	Haemophilus influenzae	n.d	HI	Gram-	Systemic	Bacillus sbtilis	MD	N/A	None	None	0	t	0.345	0	0.046	0.047	HID-0.1%-	0.00843435	0.0544116	-0.147	-0.15	0	0
163	CuOHIN/AAmoxicillin	0.91222	43.2427	0.913162	0.713454	1	0.713647	CHEMBL1082	CuO	HI	N/A	Amoxicillin	MIC ug.mL-1	-1	50	MBC (uM)	Haemophilus influenzae	n.d	HI	Gram-	Systemic	Bacillus sbtilis	MD	N/A	None	None	0	t	0.324	0	0.046	0.047	HID-0.1%-	0.00843435	0.0544116	-0.147	-0.15	0	0
164	CuOHIN/AAmoxicillin	-0.0846524	42.2458	-0.0837109	0.47885	1	0.479084	CHEMBL1082	CuO	HI	N/A	Amoxicillin	Activity %	1	70	MBC (uM)	Haemophilus influenzae	n.d	HI	Gram-	Systemic	Bacillus sbtilis	MD	N/A	None	None	0	v	0.146	0	0.046	0.047	HID-0.1%-	0.00843435	0.0544116	-0.147	-0.15	0	0
165	CuOHIN/AAmoxicillin	-0.0846524	42.2458	-0.0837109	0.47885	1	0.479084	CHEMBL1082	CuO	HI	N/A	Amoxicillin	Activity %	1	70	MBC (uM)	Haemophilus influenzae	n.d	HI	Gram-	Systemic	Bacillus sbtilis	MD	N/A	None	None	0	t	0.146	0	0.046	0.047	HID-0.1%-	0.00843435	0.0544116	-0.147	-0.15	0	0
166	CuOHIN/AAmoxicillin	0.886247	43.2167	0.887188	0.708115	1	0.70831	CHEMBL1082	CuO	HI	N/A	Amoxicillin	MIC ug.mL-1	-1	50	MBC (uM)	Haemophilus influenzae	Q1	HI	Gram-	Systemic	Bacillus sbtilis	MD	N/A	None	None	0	t	0.324	0	0.046	0.047	HID-0.1%-	0.00843435	0.0544116	-0.147	-0.15	0	-0.001
167	Fe2O3HIN/AAmoxicillin	0.886247	43.2167	0.887188	0.708115	1	0.70831	CHEMBL1082	Fe2O3	HI	N/A	Amoxicillin	MIC ug.mL-1	-1	50	MBC (uM)	Haemophilus influenzae	H128	HI	Gram-	Systemic	Bacillus sbtilis	MD	N/A	None	None	0	t	0.324	0	0.046	0.047	HID-0.1%-	0.00843435	0.0544116	-0.147	-0.15	0	-0.001
168	Fe2O3HIN/AAmoxicillin	1.02983	43.3603	1.03077	0.736883	1	0.737065	CHEMBL1082	Fe2O3	HI	N/A	Amoxicillin	MIC90 ug.mL-1	-1	34.891	MBC (uM)	Haemophilus influenzae	n.d	HI	Gram-	Systemic	Bacillus sbtilis	MD	N/A	None	None	0	v	0.345	0	0.046	0.047	HID-0.1%-	0.00843435	0.0544116	-0.147	-0.15	0	0
169	Fe2O3HIN/AAmoxicillin	1.18664	43.5171	1.18758	0.76614	1	0.766308	CHEMBL1082	Fe2O3	HI	N/A	Amoxicillin	MIC50 ug.mL-1	-1	21.529	MBC (uM)	Haemophilus influenzae	n.d	HI	Gram-	Systemic	Bacillus sbtilis	MD	N/A	None	None	0	t	0.373	0	0.046	0.047	HID-0.1%-	0.00843435	0.0544116	-0.147	-0.15	0	0
170	Fe2O3HIN/AAmoxicillin	0.91222	43.2427	0.913162	0.713454	1	0.713647	CHEMBL1082	Fe2O3	HI	N/A	Amoxicillin	MIC ug.mL-1	-1	50	MBC (uM)	Haemophilus influenzae	n.d	HI	Gram-	Systemic	Bacillus sbtilis	MD	N/A	None	None	0	t	0.324	0	0.046	0.047	HID-0.1%-	0.00843435	0.0544116	-0.147	-0.15	0	0
171	Fe2O3HIN/AAmoxicillin	-0.0846524	42.2458	-0.0837109	0.47885	1	0.479084	CHEMBL1082	Fe2O3	HI	N/A	Amoxicillin	Activity %	1	70	MBC (uM)	Haemophilus influenzae	n.d	HI	Gram-	Systemic	Bacillus sbtilis	MD	N/A	None	None	0	t	0.146	0	0.046	0.047	HID-0.1%-	0.00843435	0.0544116	-0.147	-0.15	0	0
172	Fe2O3HIN/AAmoxicillin	-0.0846524	42.2458	-0.0837109	0.47885	1	0.479084	CHEMBL1082	Fe2O3	HI	N/A	Amoxicillin	Activity %	1	70	MBC (uM)	Haemophilus influenzae	n.d	HI	Gram-	Systemic	Bacillus sbtilis	MD	N/A	None	None	0	v	0.146	0	0.046	0.047	HID-0.1%-	0.00843435	0.0544116	-0.147	-0.15	0	0
173	Fe2O3HIN/AAmoxicillin	0.886247	43.2167	0.887188	0.708115	1	0.70831	CHEMBL1082	Fe2O3	HI	N/A	Amoxicillin	MIC ug.mL-1	-1	50	MBC (uM)	Haemophilus influenzae	Q1	HI	Gram-	Systemic	Bacillus sbtilis	MD	N/A	None	None	0	t	0.324	0	0.046	0.047	HID-0.1%-	0.00843435	0.0544116	-0.147	-0.15	0	-0.001
174	AgHIN/AAmoxicillin	1.78138	44.1118	1.78232	0.855867	1	0.855983	CHEMBL1082	Ag	HI	N/A	Amoxicillin	MIC90 ug.mL-1	-1	34.891	MBC (uM)	Haemophilus influenzae	n.d	HI	Gram-	Systemic	Bacillus subtilis	ATCC6633	Spherical	None	None	0	t	0.345	0	0.046	0.047	HID-0.1%-	0.00843435	0.0544116	-0.147	-0.135	-0.001	0
175	AgHIN/AAmoxicillin	1.93819	44.2686	1.93913	0.874153	1	0.874257	CHEMBL1082	Ag	HI	N/A	Amoxicillin	MIC50 ug.mL-1	-1	21.529	MBC (uM)	Haemophilus influenzae	n.d	HI	Gram-	Systemic	Bacillus subtilis	ATCC6633	Spherical	None	None	0	t	0.373	0	0.046	0.047	HID-0.1%-	0.00843435	0.0544116	-0.147	-0.135	-0.001	0
176	AgHIN/AAmoxicillin	1.66377	43.9942	1.66471	0.840743	1	0.840869	CHEMBL1082	Ag	HI	N/A	Amoxicillin	MIC ug.mL-1	-1	50	MBC (uM)	Haemophilus influenzae	n.d	HI	Gram-	Systemic	Bacillus subtilis	ATCC6633	Spherical	None	None	0	v	0.324	0	0.046	0.047	HID-0.1%-	0.00843435	0.0544116	-0.147	-0.135	-0.001	0
177	AgHIN/AAmoxicillin	1.66377	43.9942	1.66471	0.840743	1	0.840869	CHEMBL1082	Ag	HI	N/A	Amoxicillin	MIC ug.mL-1	-1	50	MBC (uM)	Haemophilus influenzae	n.d	HI	Gram-	Systemic	Bacillus subtilis	ATCC6633	Spherical	None	None	0	t	0.324	0	0.046	0.047	HID-0.1%-	0.00843435	0.0544116	-0.147	-0.135	-0.001	0
178	AgHIN/AAmoxicillin	0.666896	42.9973	0.667837	0.660808	1	0.661019	CHEMBL1082	Ag	HI	N/A	Amoxicillin	Activity %	1	70	MBC (uM)	Haemophilus influenzae	n.d	HI	Gram-	Systemic	Bacillus subtilis	ATCC6633	Spherical	None	None	0	t	0.146	0	0.046	0.047	HID-0.1%-	0.00843435	0.0544116	-0.147	-0.135	-0.001	0
179	CuOHIN/AAmoxicillin	0.886247	43.2167	0.887188	0.708115	1	0.70831	CHEMBL1082	CuO	HI	N/A	Amoxicillin	MIC ug.mL-1	-1	50	MBC (uM)	Haemophilus influenzae	H128	HI	Gram-	Systemic	Bacillus sbtilis	MD	N/A	None	None	0	t	0.324	0	0.046	0.047	HID-0.1%-	0.00843435	0.0544116	-0.147	-0.15	0	-0.001
180	CuOHIN/AAmoxicillin	1.02983	43.3603	1.03077	0.736883	1	0.737065	CHEMBL1082	CuO	HI	N/A	Amoxicillin	MIC90 ug.mL-1	-1	34.891	MBC (uM)	Haemophilus influenzae	n.d	HI	Gram-	Systemic	Bacillus sbtilis	MD	N/A	None	None	0	t	0.345	0	0.046	0.047	HID-0.1%-	0.00843435	0.0544116	-0.147	-0.15	0	0
181	CuOHIN/AAmoxicillin	1.18664	43.5171	1.18758	0.76614	1	0.766308	CHEMBL1082	CuO	HI	N/A	Amoxicillin	MIC50 ug.mL-1	-1	21.529	MBC (uM)	Haemophilus influenzae	n.d	HI	Gram-	Systemic	Bacillus sbtilis	MD	N/A	None	None	0	t	0.373	0	0.046	0.047	HID-0.1%-	0.00843435	0.0544116	-0.147	-0.15	0	0
182	CuOHIN/AAmoxicillin	0.91222	43.2427	0.913162	0.713454	1	0.713647	CHEMBL1082	CuO	HI	N/A	Amoxicillin	MIC ug.mL-1	-1	50	MBC (uM)	Haemophilus influenzae	n.d	HI	Gram-	Systemic	Bacillus sbtilis	MD	N/A	None	None	0	t	0.324	0	0.046	0.047	HID-0.1%-	0.00843435	0.0544116	-0.147	-0.15	0	0
183	CuOHIN/AAmoxicillin	-0.0846524	42.2458	-0.0837109	0.47885	1	0.479084	CHEMBL1082	CuO	HI	N/A	Amoxicillin	Activity %	1	70	MBC (uM)	Haemophilus influenzae	n.d	HI	Gram-	Systemic	Bacillus sbtilis	MD	N/A	None	None	0	v	0.146	0	0.046	0.047	HID-0.1%-	0.00843435	0.0544116	-0.147	-0.15	0	0
184	CuOHIN/AAmoxicillin	-0.0846524	42.2458	-0.0837109	0.47885	1	0.479084	CHEMBL1082	CuO	HI	N/A	Amoxicillin	Activity %	1	70	MBC (uM)	Haemophilus influenzae	n.d	HI	Gram-	Systemic	Bacillus sbtilis	MD	N/A	None	None	0	t	0.146	0	0.046	0.047	HID-0.1%-	0.00843435	0.0544116	-0.147	-0.15	0	0
185	CuHIN/AAmoxicillin	-0.196066	42.1344	-0.195125	0.45114	1	0.451373	CHEMBL1082	Cu	HI	N/A	Amoxicillin	MIC90 ug.mL-1	-1	34.891	MBC (uM)	Haemophilus influenzae	n.d	HI	Gram-	Systemic	Bacillus subtilis	ATCC6633	Spherical	None	None	0	t	0.345	0	0.046	0.047	HID-0.1%-	0.00843435	0.0544116	-0.147	-0.15	-0.001	0
186	CuHIN/AAmoxicillin	-2.12821	40.2022	-2.12727	0.106385	1	0.106475	CHEMBL1082	Cu	HI	N/A	Amoxicillin	MIC90 %	-1	1	MBC (uM)	Haemophilus influenzae	n.d	HI	Gram-	Systemic	Bacillus subtilis	ATCC6633	Spherical	None	None	0	t	0	0	0.046	0.047	HID-0.1%-	0.00843435	0.0544116	-0.147	-0.15	-0.001	0
187	CuHIN/AAmoxicillin	-0.0392547	42.2912	-0.0383131	0.490188	1	0.490423	CHEMBL1082	Cu	HI	N/A	Amoxicillin	MIC50 ug.mL-1	-1	21.529	MBC (uM)	Haemophilus influenzae	n.d	HI	Gram-	Systemic	Bacillus subtilis	ATCC6633	Spherical	None	None	0	v	0.373	0	0.046	0.047	HID-0.1%-	0.00843435	0.0544116	-0.147	-0.15	-0.001	0
188	CuHIN/AAmoxicillin	-0.313675	42.0168	-0.312733	0.422218	1	0.422448	CHEMBL1082	Cu	HI	N/A	Amoxicillin	MIC ug.mL-1	-1	50	MBC (uM)	Haemophilus influenzae	n.d	HI	Gram-	Systemic	Bacillus subtilis	ATCC6633	Spherical	None	None	0	t	0.324	0	0.046	0.047	HID-0.1%-	0.00843435	0.0544116	-0.147	-0.15	-0.001	0
189	CuHIN/AAmoxicillin	-0.313675	42.0168	-0.312733	0.422218	1	0.422448	CHEMBL1082	Cu	HI	N/A	Amoxicillin	MIC ug.mL-1	-1	50	MBC (uM)	Haemophilus influenzae	n.d	HI	Gram-	Systemic	Bacillus subtilis	ATCC6633	Spherical	None	None	0	t	0.324	0	0.046	0.047	HID-0.1%-	0.00843435	0.0544116	-0.147	-0.15	-0.001	0
190	CuHIN/AAmoxicillin	-1.31055	41.0199	-1.30961	0.212395	1	0.212553	CHEMBL1082	Cu	HI	N/A	Amoxicillin	Activity %	1	70	MBC (uM)	Haemophilus influenzae	n.d	HI	Gram-	Systemic	Bacillus subtilis	ATCC6633	Spherical	None	None	0	t	0.146	0	0.046	0.047	HID-0.1%-	0.00843435	0.0544116	-0.147	-0.15	-0.001	0
191	CuOHIN/AAmoxicillin	0.886247	43.2167	0.887188	0.708115	1	0.70831	CHEMBL1082	CuO	HI	N/A	Amoxicillin	MIC ug.mL-1	-1	50	MBC (uM)	Haemophilus influenzae	H128	HI	Gram-	Systemic	Bacillus sbtilis	MD	N/A	None	None	0	v	0.324	0	0.046	0.047	HID-0.1%-	0.00843435	0.0544116	-0.147	-0.15	0	-0.001
192	CuOHIN/AAmoxicillin	1.02983	43.3603	1.03077	0.736883	1	0.737065	CHEMBL1082	CuO	HI	N/A	Amoxicillin	MIC90 ug.mL-1	-1	34.891	MBC (uM)	Haemophilus influenzae	n.d	HI	Gram-	Systemic	Bacillus sbtilis	MD	N/A	None	None	0	t	0.345	0	0.046	0.047	HID-0.1%-	0.00843435	0.0544116	-0.147	-0.15	0	0
193	CuOHIN/AAmoxicillin	1.02983	43.3603	1.03077	0.736883	1	0.737065	CHEMBL1082	CuO	HI	N/A	Amoxicillin	MIC90 ug.mL-1	-1	34.891	MBC (uM)	Haemophilus influenzae	n.d	HI	Gram-	Systemic	Bacillus sbtilis	MD	N/A	None	None	0	t	0.345	0	0.046	0.047	HID-0.1%-	0.00843435	0.0544116	-0.147	-0.15	0	0
194	CuOHIN/AAmoxicillin	1.18664	43.5171	1.18758	0.76614	1	0.766308	CHEMBL1082	CuO	HI	N/A	Amoxicillin	MIC50 ug.mL-1	-1	21.529	MBC (uM)	Haemophilus influenzae	n.d	HI	Gram-	Systemic	Bacillus sbtilis	MD	N/A	None	None	0	t	0.373	0	0.046	0.047	HID-0.1%-	0.00843435	0.0544116	-0.147	-0.15	0	0
195	CuOHIN/AAmoxicillin	0.91222	43.2427	0.913162	0.713454	1	0.713647	CHEMBL1082	CuO	HI	N/A	Amoxicillin	MIC ug.mL-1	-1	50	MBC (uM)	Haemophilus influenzae	n.d	HI	Gram-	Systemic	Bacillus sbtilis	MD	N/A	None	None	0	v	0.324	0	0.046	0.047	HID-0.1%-	0.00843435	0.0544116	-0.147	-0.15	0	0
196	CuOHIN/AAmoxicillin	-0.0846524	42.2458	-0.0837109	0.47885	1	0.479084	CHEMBL1082	CuO	HI	N/A	Amoxicillin	Activity %	1	70	MBC (uM)	Haemophilus influenzae	n.d	HI	Gram-	Systemic	Bacillus sbtilis	MD	N/A	None	None	0	t	0.146	0	0.046	0.047	HID-0.1%-	0.00843435	0.0544116	-0.147	-0.15	0	0
197	CuOHIN/AAmoxicillin	-0.0846524	42.2458	-0.0837109	0.47885	1	0.479084	CHEMBL1082	CuO	HI	N/A	Amoxicillin	Activity %	1	70	MBC (uM)	Haemophilus influenzae	n.d	HI	Gram-	Systemic	Bacillus sbtilis	MD	N/A	None	None	0	t	0.146	0	0.046	0.047	HID-0.1%-	0.00843435	0.0544116	-0.147	-0.15	0	0
198	CuIHIN/AAmoxicillin	1.91308	44.2435	1.91402	0.871365	1	0.87147	CHEMBL1082	CuI	HI	N/A	Amoxicillin	MIC90 ug.mL-1	-1	34.891	MBC (uM)	Haemophilus influenzae	n.d	HI	Gram-	Systemic	Bacillus subtilis	ATCC6633	N/A	None	None	0	t	0.345	0	0.046	0.047	HID-0.1%-	0.00843435	0.0544116	-0.143	-0.15	-0.001	0
199	CuIHIN/AAmoxicillin	2.06989	44.4003	2.07083	0.887942	1	0.888036	CHEMBL1082	CuI	HI	N/A	Amoxicillin	MIC50 ug.mL-1	-1	21.529	MBC (uM)	Haemophilus influenzae	n.d	HI	Gram-	Systemic	Bacillus subtilis	ATCC6633	N/A	None	None	0	t	0.373	0	0.046	0.047	HID-0.1%-	0.00843435	0.0544116	-0.143	-0.15	-0.001	0
200	CuIHIN/AAmoxicillin	1.79547	44.1259	1.79641	0.857596	1	0.857711	CHEMBL1082	CuI	HI	N/A	Amoxicillin	MIC ug.mL-1	-1	50	MBC (uM)	Haemophilus influenzae	n.d	HI	Gram-	Systemic	Bacillus subtilis	ATCC6633	N/A	None	None	0	t	0.324	0	0.046	0.047	HID-0.1%-	0.00843435	0.0544116	-0.143	-0.15	-0.001	0
201	CuIHIN/AAmoxicillin	1.79547	44.1259	1.79641	0.857596	1	0.857711	CHEMBL1082	CuI	HI	N/A	Amoxicillin	MIC ug.mL-1	-1	50	MBC (uM)	Haemophilus influenzae	n.d	HI	Gram-	Systemic	Bacillus subtilis	ATCC6633	N/A	None	None	0	t	0.324	0	0.046	0.047	HID-0.1%-	0.00843435	0.0544116	-0.143	-0.15	-0.001	0
202	CuIHIN/AAmoxicillin	0.798596	43.129	0.799538	0.689674	1	0.689876	CHEMBL1082	CuI	HI	N/A	Amoxicillin	Activity %	1	70	MBC (uM)	Haemophilus influenzae	n.d	HI	Gram-	Systemic	Bacillus subtilis	ATCC6633	N/A	None	None	0	v	0.146	0	0.046	0.047	HID-0.1%-	0.00843435	0.0544116	-0.143	-0.15	-0.001	0
203	CuIHIN/AAmoxicillin	1.82144	44.1519	1.82238	0.860739	1	0.860852	CHEMBL1082	CuI	HI	N/A	Amoxicillin	MIC ug.mL-1	-1	50	MBC (uM)	Haemophilus influenzae	Rd clone	HI	Gram-	Systemic	Bacillus subtilis	ATCC6633	N/A	None	None	0	t	0.324	0	0.046	0.047	HID-0.1%-	0.00843435	0.0544116	-0.143	-0.15	-0.001	0.001
204	CuOHIN/AAmoxicillin	0.886247	43.2167	0.887188	0.708115	1	0.70831	CHEMBL1082	CuO	HI	N/A	Amoxicillin	MIC ug.mL-1	-1	50	MBC (uM)	Haemophilus influenzae	H128	HI	Gram-	Systemic	Bacillus sbtilis	MD	N/A	None	None	0	t	0.324	0	0.046	0.047	HID-0.1%-	0.00843435	0.0544116	-0.147	-0.15	0	-0.001
205	CuOHIN/AAmoxicillin	1.02983	43.3603	1.03077	0.736883	1	0.737065	CHEMBL1082	CuO	HI	N/A	Amoxicillin	MIC90 ug.mL-1	-1	34.891	MBC (uM)	Haemophilus influenzae	n.d	HI	Gram-	Systemic	Bacillus sbtilis	MD	N/A	None	None	0	t	0.345	0	0.046	0.047	HID-0.1%-	0.00843435	0.0544116	-0.147	-0.15	0	0
206	CuOHIN/AAmoxicillin	1.18664	43.5171	1.18758	0.76614	1	0.766308	CHEMBL1082	CuO	HI	N/A	Amoxicillin	MIC50 ug.mL-1	-1	21.529	MBC (uM)	Haemophilus influenzae	n.d	HI	Gram-	Systemic	Bacillus sbtilis	MD	N/A	None	None	0	t	0.373	0	0.046	0.047	HID-0.1%-	0.00843435	0.0544116	-0.147	-0.15	0	0
207	CuOHIN/AAmoxicillin	0.91222	43.2427	0.913162	0.713454	1	0.713647	CHEMBL1082	CuO	HI	N/A	Amoxicillin	MIC ug.mL-1	-1	50	MBC (uM)	Haemophilus influenzae	n.d	HI	Gram-	Systemic	Bacillus sbtilis	MD	N/A	None	None	0	t	0.324	0	0.046	0.047	HID-0.1%-	0.00843435	0.0544116	-0.147	-0.15	0	0
208	CuOHIN/AAmoxicillin	-0.0846524	42.2458	-0.0837109	0.47885	1	0.479084	CHEMBL1082	CuO	HI	N/A	Amoxicillin	Activity %	1	70	MBC (uM)	Haemophilus influenzae	n.d	HI	Gram-	Systemic	Bacillus sbtilis	MD	N/A	None	None	0	v	0.146	0	0.046	0.047	HID-0.1%-	0.00843435	0.0544116	-0.147	-0.15	0	0
209	CuOHIN/AAmoxicillin	-0.0846524	42.2458	-0.0837109	0.47885	1	0.479084	CHEMBL1082	CuO	HI	N/A	Amoxicillin	Activity %	1	70	MBC (uM)	Haemophilus influenzae	n.d	HI	Gram-	Systemic	Bacillus sbtilis	MD	N/A	None	None	0	t	0.146	0	0.046	0.047	HID-0.1%-	0.00843435	0.0544116	-0.147	-0.15	0	0
210	CuOHIN/AAmoxicillin	1.02983	43.3603	1.03077	0.736883	1	0.737065	CHEMBL1082	CuO	HI	N/A	Amoxicillin	MIC90 ug.mL-1	-1	34.891	MBC (uM)	Haemophilus influenzae	n.d	HI	Gram-	Systemic	Bacillus sbtilis	MD	N/A	None	None	0	v	0.345	0	0.046	0.047	HID-0.1%-	0.00843435	0.0544116	-0.147	-0.15	0	0
211	CuOHIN/AAmoxicillin	1.02983	43.3603	1.03077	0.736883	1	0.737065	CHEMBL1082	CuO	HI	N/A	Amoxicillin	MIC90 ug.mL-1	-1	34.891	MBC (uM)	Haemophilus influenzae	n.d	HI	Gram-	Systemic	Bacillus sbtilis	MD	N/A	None	None	0	t	0.345	0	0.046	0.047	HID-0.1%-	0.00843435	0.0544116	-0.147	-0.15	0	0
212	CuOHIN/AAmoxicillin	1.18664	43.5171	1.18758	0.76614	1	0.766308	CHEMBL1082	CuO	HI	N/A	Amoxicillin	MIC50 ug.mL-1	-1	21.529	MBC (uM)	Haemophilus influenzae	n.d	HI	Gram-	Systemic	Bacillus sbtilis	MD	N/A	None	None	0	t	0.373	0	0.046	0.047	HID-0.1%-	0.00843435	0.0544116	-0.147	-0.15	0	0
213	CuOHIN/AAmoxicillin	0.91222	43.2427	0.913162	0.713454	1	0.713647	CHEMBL1082	CuO	HI	N/A	Amoxicillin	MIC ug.mL-1	-1	50	MBC (uM)	Haemophilus influenzae	n.d	HI	Gram-	Systemic	Bacillus sbtilis	MD	N/A	None	None	0	t	0.324	0	0.046	0.047	HID-0.1%-	0.00843435	0.0544116	-0.147	-0.15	0	0
214	CuOHIN/AAmoxicillin	-0.0846524	42.2458	-0.0837109	0.47885	1	0.479084	CHEMBL1082	CuO	HI	N/A	Amoxicillin	Activity %	1	70	MBC (uM)	Haemophilus influenzae	n.d	HI	Gram-	Systemic	Bacillus sbtilis	MD	N/A	None	None	0	t	0.146	0	0.046	0.047	HID-0.1%-	0.00843435	0.0544116	-0.147	-0.15	0	0
215	CuOHIN/AAmoxicillin	-0.0846524	42.2458	-0.0837109	0.47885	1	0.479084	CHEMBL1082	CuO	HI	N/A	Amoxicillin	Activity %	1	70	MBC (uM)	Haemophilus influenzae	n.d	HI	Gram-	Systemic	Bacillus sbtilis	MD	N/A	None	None	0	t	0.146	0	0.046	0.047	HID-0.1%-	0.00843435	0.0544116	-0.147	-0.15	0	0
216	CuHIN/AAmoxicillin	0.403178	42.7336	0.404119	0.599451	1	0.599677	CHEMBL1082	Cu	HI	N/A	Amoxicillin	MIC90 ug.mL-1	-1	34.891	MIC (uM)	Haemophilus influenzae	n.d	HI	Gram-	Systemic	Bacillus subtilis	ATCC6633	Spherical	None	None	0	t	0.452	0	0.046	0.047	HID-0.1%-	0.00843435	0.0544116	-0.147	-0.15	-0.001	0
217	CuHIN/AAmoxicillin	0.604792	42.9352	0.605734	0.646752	1	0.646967	CHEMBL1082	Cu	HI	N/A	Amoxicillin	MIC50 ug.mL-1	-1	21.529	MIC (uM)	Haemophilus influenzae	n.d	HI	Gram-	Systemic	Bacillus subtilis	ATCC6633	Spherical	None	None	0	t	0.488	0	0.046	0.047	HID-0.1%-	0.00843435	0.0544116	-0.147	-0.15	-0.001	0
218	CuHIN/AAmoxicillin	0.604792	42.9352	0.605734	0.646752	1	0.646967	CHEMBL1082	Cu	HI	N/A	Amoxicillin	MIC50 ug.mL-1	-1	21.529	MIC (uM)	Haemophilus influenzae	n.d	HI	Gram-	Systemic	Bacillus subtilis	ATCC6633	Spherical	None	None	0	v	0.488	0	0.046	0.047	HID-0.1%-	0.00843435	0.0544116	-0.147	-0.15	-0.001	0
219	CuHIN/AAmoxicillin	0.246366	42.5768	0.247308	0.561282	1	0.561514	CHEMBL1082	Cu	HI	N/A	Amoxicillin	MIC ug.mL-1	-1	50	MIC (uM)	Haemophilus influenzae	n.d	HI	Gram-	Systemic	Bacillus subtilis	ATCC6633	Spherical	None	None	0	t	0.424	0	0.046	0.047	HID-0.1%-	0.00843435	0.0544116	-0.147	-0.15	-0.001	0
220	CuHIN/AAmoxicillin	0.246366	42.5768	0.247308	0.561282	1	0.561514	CHEMBL1082	Cu	HI	N/A	Amoxicillin	MIC ug.mL-1	-1	50	MIC (uM)	Haemophilus influenzae	n.d	HI	Gram-	Systemic	Bacillus subtilis	ATCC6633	Spherical	None	None	0	t	0.424	0	0.046	0.047	HID-0.1%-	0.00843435	0.0544116	-0.147	-0.15	-0.001	0
221	CuHIN/AAmoxicillin	-1.05853	41.2719	-1.05759	0.257591	1	0.257771	CHEMBL1082	Cu	HI	N/A	Amoxicillin	Activity %	1	70	MIC (uM)	Haemophilus influenzae	n.d	HI	Gram-	Systemic	Bacillus subtilis	ATCC6633	Spherical	None	None	0	t	0.191	0	0.046	0.047	HID-0.1%-	0.00843435	0.0544116	-0.147	-0.15	-0.001	0
222	AgHIN/AAmoxicillin	2.38062	44.7111	2.38156	0.915338	1	0.915411	CHEMBL1082	Ag	HI	N/A	Amoxicillin	MIC90 ug.mL-1	-1	34.891	MIC (uM)	Haemophilus influenzae	n.d	HI	Gram-	Systemic	Bacillus subtilis	ATCC6633	Spherical	None	None	0	t	0.452	0	0.046	0.047	HID-0.1%-	0.00843435	0.0544116	-0.147	-0.135	-0.001	0
223	AgHIN/AAmoxicillin	2.58224	44.9127	2.58318	0.92971	1	0.929771	CHEMBL1082	Ag	HI	N/A	Amoxicillin	MIC50 ug.mL-1	-1	21.529	MIC (uM)	Haemophilus influenzae	n.d	HI	Gram-	Systemic	Bacillus subtilis	ATCC6633	Spherical	None	None	0	t	0.488	0	0.046	0.047	HID-0.1%-	0.00843435	0.0544116	-0.147	-0.135	-0.001	0
224	AgHIN/AAmoxicillin	2.22381	44.5542	2.22475	0.902367	1	0.90245	CHEMBL1082	Ag	HI	N/A	Amoxicillin	MIC ug.mL-1	-1	50	MIC (uM)	Haemophilus influenzae	n.d	HI	Gram-	Systemic	Bacillus subtilis	ATCC6633	Spherical	None	None	0	v	0.424	0	0.046	0.047	HID-0.1%-	0.00843435	0.0544116	-0.147	-0.135	-0.001	0
225	AgHIN/AAmoxicillin	2.22381	44.5542	2.22475	0.902367	1	0.90245	CHEMBL1082	Ag	HI	N/A	Amoxicillin	MIC ug.mL-1	-1	50	MIC (uM)	Haemophilus influenzae	n.d	HI	Gram-	Systemic	Bacillus subtilis	ATCC6633	Spherical	None	None	0	t	0.424	0	0.046	0.047	HID-0.1%-	0.00843435	0.0544116	-0.147	-0.135	-0.001	0
226	AgHIN/AAmoxicillin	0.918914	43.2494	0.919856	0.714821	1	0.715013	CHEMBL1082	Ag	HI	N/A	Amoxicillin	Activity %	1	70	MIC (uM)	Haemophilus influenzae	n.d	HI	Gram-	Systemic	Bacillus subtilis	ATCC6633	Spherical	None	None	0	t	0.191	0	0.046	0.047	HID-0.1%-	0.00843435	0.0544116	-0.147	-0.135	-0.001	0
227	CuOHIN/AAmoxicillin	1.47226	43.8027	1.4732	0.813401	1	0.813544	CHEMBL1082	CuO	HI	N/A	Amoxicillin	MIC ug.mL-1	-1	50	MIC (uM)	Haemophilus influenzae	MSC06647	HI	Gram-	Systemic	Bacillus sbtilis	MD	N/A	None	None	0	v	0.424	0	0.046	0.047	HID-0.1%-	0.00843435	0.0544116	-0.147	-0.15	0	0
228	CuOHIN/AAmoxicillin	1.47226	43.8027	1.4732	0.813401	1	0.813544	CHEMBL1082	CuO	HI	N/A	Amoxicillin	MIC ug.mL-1	-1	50	MIC (uM)	Haemophilus influenzae	MSC06663	HI	Gram-	Systemic	Bacillus sbtilis	MD	N/A	None	None	0	t	0.424	0	0.046	0.047	HID-0.1%-	0.00843435	0.0544116	-0.147	-0.15	0	0
229	CuOHIN/AAmoxicillin	1.62907	43.9595	1.63001	0.836043	1	0.836172	CHEMBL1082	CuO	HI	N/A	Amoxicillin	MIC90 ug.mL-1	-1	34.891	MIC (uM)	Haemophilus influenzae	n.d	HI	Gram-	Systemic	Bacillus sbtilis	MD	N/A	None	None	0	t	0.452	0	0.046	0.047	HID-0.1%-	0.00843435	0.0544116	-0.147	-0.15	0	0
230	CuOHIN/AAmoxicillin	1.83069	44.1611	1.83163	0.861844	1	0.861956	CHEMBL1082	CuO	HI	N/A	Amoxicillin	MIC50 ug.mL-1	-1	21.529	MIC (uM)	Haemophilus influenzae	n.d	HI	Gram-	Systemic	Bacillus sbtilis	MD	N/A	None	None	0	v	0.488	0	0.046	0.047	HID-0.1%-	0.00843435	0.0544116	-0.147	-0.15	0	0
231	CuOHIN/AAmoxicillin	1.47226	43.8027	1.4732	0.813401	1	0.813544	CHEMBL1082	CuO	HI	N/A	Amoxicillin	MIC ug.mL-1	-1	50	MIC (uM)	Haemophilus influenzae	n.d	HI	Gram-	Systemic	Bacillus sbtilis	MD	N/A	None	None	0	t	0.424	0	0.046	0.047	HID-0.1%-	0.00843435	0.0544116	-0.147	-0.15	0	0
232	CuOHIN/AAmoxicillin	0.167366	42.4978	0.168308	0.541744	1	0.541978	CHEMBL1082	CuO	HI	N/A	Amoxicillin	Activity %	1	70	MIC (uM)	Haemophilus influenzae	n.d	HI	Gram-	Systemic	Bacillus sbtilis	MD	N/A	None	None	0	t	0.191	0	0.046	0.047	HID-0.1%-	0.00843435	0.0544116	-0.147	-0.15	0	0
233	CuOHIN/AAmoxicillin	0.167366	42.4978	0.168308	0.541744	1	0.541978	CHEMBL1082	CuO	HI	N/A	Amoxicillin	Activity %	1	70	MIC (uM)	Haemophilus influenzae	n.d	HI	Gram-	Systemic	Bacillus sbtilis	MD	N/A	None	None	0	t	0.191	0	0.046	0.047	HID-0.1%-	0.00843435	0.0544116	-0.147	-0.15	0	0
234	CuOHIN/AAmoxicillin	1.62907	43.9595	1.63001	0.836043	1	0.836172	CHEMBL1082	CuO	HI	N/A	Amoxicillin	MIC90 ug.mL-1	-1	34.891	MIC (uM)	Haemophilus influenzae	n.d	HI	Gram-	Systemic	Bacillus sbtilis	MD	N/A	None	None	0	t	0.452	0	0.046	0.047	HID-0.1%-	0.00843435	0.0544116	-0.147	-0.15	0	0
235	CuOHIN/AAmoxicillin	1.83069	44.1611	1.83163	0.861844	1	0.861956	CHEMBL1082	CuO	HI	N/A	Amoxicillin	MIC50 ug.mL-1	-1	21.529	MIC (uM)	Haemophilus influenzae	n.d	HI	Gram-	Systemic	Bacillus sbtilis	MD	N/A	None	None	0	t	0.488	0	0.046	0.047	HID-0.1%-	0.00843435	0.0544116	-0.147	-0.15	0	0
236	CuOHIN/AAmoxicillin	1.47226	43.8027	1.4732	0.813401	1	0.813544	CHEMBL1082	CuO	HI	N/A	Amoxicillin	MIC ug.mL-1	-1	50	MIC (uM)	Haemophilus influenzae	n.d	HI	Gram-	Systemic	Bacillus sbtilis	MD	N/A	None	None	0	t	0.424	0	0.046	0.047	HID-0.1%-	0.00843435	0.0544116	-0.147	-0.15	0	0
237	CuOHIN/AAmoxicillin	1.47226	43.8027	1.4732	0.813401	1	0.813544	CHEMBL1082	CuO	HI	N/A	Amoxicillin	MIC ug.mL-1	-1	50	MIC (uM)	Haemophilus influenzae	n.d	HI	Gram-	Systemic	Bacillus sbtilis	MD	N/A	None	None	0	v	0.424	0	0.046	0.047	HID-0.1%-	0.00843435	0.0544116	-0.147	-0.15	0	0
238	CuOHIN/AAmoxicillin	0.167366	42.4978	0.168308	0.541744	1	0.541978	CHEMBL1082	CuO	HI	N/A	Amoxicillin	Activity %	1	70	MIC (uM)	Haemophilus influenzae	n.d	HI	Gram-	Systemic	Bacillus sbtilis	MD	N/A	None	None	0	t	0.191	0	0.046	0.047	HID-0.1%-	0.00843435	0.0544116	-0.147	-0.15	0	0
239	CuIHIN/AAmoxicillin	2.51232	44.8428	2.51326	0.925001	1	0.925066	CHEMBL1082	CuI	HI	N/A	Amoxicillin	MIC90 ug.mL-1	-1	34.891	MIC (uM)	Haemophilus influenzae	n.d	HI	Gram-	Systemic	Bacillus subtilis	ATCC6633	N/A	None	None	0	t	0.452	0	0.046	0.047	HID-0.1%-	0.00843435	0.0544116	-0.143	-0.15	-0.001	0
240	CuIHIN/AAmoxicillin	2.71394	45.0444	2.71488	0.937844	1	0.937899	CHEMBL1082	CuI	HI	N/A	Amoxicillin	MIC50 ug.mL-1	-1	21.529	MIC (uM)	Haemophilus influenzae	n.d	HI	Gram-	Systemic	Bacillus subtilis	ATCC6633	N/A	None	None	0	v	0.488	0	0.046	0.047	HID-0.1%-	0.00843435	0.0544116	-0.143	-0.15	-0.001	0
241	CuIHIN/AAmoxicillin	2.35551	44.6859	2.35645	0.913371	1	0.913446	CHEMBL1082	CuI	HI	N/A	Amoxicillin	MIC ug.mL-1	-1	50	MIC (uM)	Haemophilus influenzae	n.d	HI	Gram-	Systemic	Bacillus subtilis	ATCC6633	N/A	None	None	0	t	0.424	0	0.046	0.047	HID-0.1%-	0.00843435	0.0544116	-0.143	-0.15	-0.001	0
242	CuIHIN/AAmoxicillin	2.35551	44.6859	2.35645	0.913371	1	0.913446	CHEMBL1082	CuI	HI	N/A	Amoxicillin	MIC ug.mL-1	-1	50	MIC (uM)	Haemophilus influenzae	n.d	HI	Gram-	Systemic	Bacillus subtilis	ATCC6633	N/A	None	None	0	t	0.424	0	0.046	0.047	HID-0.1%-	0.00843435	0.0544116	-0.143	-0.15	-0.001	0
243	CuIHIN/AAmoxicillin	1.05061	43.3811	1.05156	0.740893	1	0.741074	CHEMBL1082	CuI	HI	N/A	Amoxicillin	Activity %	1	70	MIC (uM)	Haemophilus influenzae	n.d	HI	Gram-	Systemic	Bacillus subtilis	ATCC6633	N/A	None	None	0	v	0.191	0	0.046	0.047	HID-0.1%-	0.00843435	0.0544116	-0.143	-0.15	-0.001	0
244	CuOHIN/AAmoxicillin	1.83069	44.1611	1.83163	0.861844	1	0.861956	CHEMBL1082	CuO	HI	N/A	Amoxicillin	MIC50 ug.mL-1	-1	21.529	MIC (uM)	Haemophilus influenzae	n.d	HI	Gram-	Systemic	Bacillus sbtilis	MD	N/A	None	None	0	t	0.488	0	0.046	0.047	HID-0.1%-	0.00843435	0.0544116	-0.147	-0.15	0	0
245	CuOHIN/AAmoxicillin	1.47226	43.8027	1.4732	0.813401	1	0.813544	CHEMBL1082	CuO	HI	N/A	Amoxicillin	MIC ug.mL-1	-1	50	MIC (uM)	Haemophilus influenzae	n.d	HI	Gram-	Systemic	Bacillus sbtilis	MD	N/A	None	None	0	t	0.424	0	0.046	0.047	HID-0.1%-	0.00843435	0.0544116	-0.147	-0.15	0	0
246	CuOHIN/AAmoxicillin	1.47226	43.8027	1.4732	0.813401	1	0.813544	CHEMBL1082	CuO	HI	N/A	Amoxicillin	MIC ug.mL-1	-1	50	MIC (uM)	Haemophilus influenzae	n.d	HI	Gram-	Systemic	Bacillus sbtilis	MD	N/A	None	None	0	v	0.424	0	0.046	0.047	HID-0.1%-	0.00843435	0.0544116	-0.147	-0.15	0	0
247	CuOHIN/AAmoxicillin	0.167366	42.4978	0.168308	0.541744	1	0.541978	CHEMBL1082	CuO	HI	N/A	Amoxicillin	Activity %	1	70	MIC (uM)	Haemophilus influenzae	n.d	HI	Gram-	Systemic	Bacillus sbtilis	MD	N/A	None	None	0	t	0.191	0	0.046	0.047	HID-0.1%-	0.00843435	0.0544116	-0.147	-0.15	0	0
248	CuOHIN/AAmoxicillin	1.83069	44.1611	1.83163	0.861844	1	0.861956	CHEMBL1082	CuO	HI	N/A	Amoxicillin	MIC50 ug.mL-1	-1	21.529	MIC (uM)	Haemophilus influenzae	n.d	HI	Gram-	Systemic	Bacillus sbtilis	MD	N/A	None	None	0	t	0.488	0	0.046	0.047	HID-0.1%-	0.00843435	0.0544116	-0.147	-0.15	0	0
249	CuOHIN/AAmoxicillin	1.47226	43.8027	1.4732	0.813401	1	0.813544	CHEMBL1082	CuO	HI	N/A	Amoxicillin	MIC ug.mL-1	-1	50	MIC (uM)	Haemophilus influenzae	n.d	HI	Gram-	Systemic	Bacillus sbtilis	MD	N/A	None	None	0	v	0.424	0	0.046	0.047	HID-0.1%-	0.00843435	0.0544116	-0.147	-0.15	0	0
250	CuOHIN/AAmoxicillin	1.47226	43.8027	1.4732	0.813401	1	0.813544	CHEMBL1082	CuO	HI	N/A	Amoxicillin	MIC ug.mL-1	-1	50	MIC (uM)	Haemophilus influenzae	n.d	HI	Gram-	Systemic	Bacillus sbtilis	MD	N/A	None	None	0	t	0.424	0	0.046	0.047	HID-0.1%-	0.00843435	0.0544116	-0.147	-0.15	0	0
251	CuOHIN/AAmoxicillin	0.167366	42.4978	0.168308	0.541744	1	0.541978	CHEMBL1082	CuO	HI	N/A	Amoxicillin	Activity %	1	70	MIC (uM)	Haemophilus influenzae	n.d	HI	Gram-	Systemic	Bacillus sbtilis	MD	N/A	None	None	0	t	0.191	0	0.046	0.047	HID-0.1%-	0.00843435	0.0544116	-0.147	-0.15	0	0
252	ZnOHPN/AAmoxicillin	2.78816	76.5224	-2.54865	0.942033	1	0.0725173	CHEMBL1082	ZnO	HP	N/A	Amoxicillin	MIC90 ug.mL-1	-1	34.891	MBC (uM)	Helicobacter pylori	n.d	HP	Gram-	GIT	Bacillus sbtilis	MD	N/A	None	None	0	t	0.345	0	0.077	0.079	HPD-0.1%-	0.0068278	0.0836499	-0.147	-0.15	0	-0.002
253	ZnOHPN/AAmoxicillin	2.67055	76.4048	-2.66626	0.935267	1	0.064994	CHEMBL1082	ZnO	HP	N/A	Amoxicillin	MIC ug.mL-1	-1	50	MBC (uM)	Helicobacter pylori	n.d	HP	Gram-	GIT	Bacillus sbtilis	MD	N/A	None	None	0	v	0.324	0	0.077	0.079	HPD-0.1%-	0.0068278	0.0836499	-0.147	-0.15	0	-0.002
254	ZnOHPN/AAmoxicillin	3.02898	76.7632	-2.30783	0.953866	1	0.0904764	CHEMBL1082	ZnO	HP	N/A	Amoxicillin	IZ mm	1	5	MBC (uM)	Helicobacter pylori	n.d	HP	Gram-	GIT	Bacillus sbtilis	MD	N/A	None	None	0	t	0.388	0	0.077	0.079	HPD-0.1%-	0.0068278	0.0836499	-0.147	-0.15	0	-0.002
255	CuOHPN/AAmoxicillin	2.67055	76.4048	-2.66626	0.935267	1	0.064994	CHEMBL1082	CuO	HP	N/A	Amoxicillin	MIC ug.mL-1	-1	50	MBC (uM)	Helicobacter pylori	n.d	HP	Gram-	GIT	Bacillus sbtilis	MD	N/A	None	None	0	v	0.324	0	0.077	0.079	HPD-0.1%-	0.0068278	0.0836499	-0.147	-0.15	0	-0.002
256	CuOHPN/AAmoxicillin	2.67055	76.4048	-2.66626	0.935267	1	0.064994	CHEMBL1082	CuO	HP	N/A	Amoxicillin	MIC ug.mL-1	-1	50	MBC (uM)	Helicobacter pylori	n.d	HP	Gram-	GIT	Bacillus sbtilis	MD	N/A	None	None	0	t	0.324	0	0.077	0.079	HPD-0.1%-	0.0068278	0.0836499	-0.147	-0.15	0	-0.002
257	CuOHPN/AAmoxicillin	3.02898	76.7632	-2.30783	0.953866	1	0.0904764	CHEMBL1082	CuO	HP	N/A	Amoxicillin	IZ mm	1	5	MBC (uM)	Helicobacter pylori	n.d	HP	Gram-	GIT	Bacillus sbtilis	MD	N/A	None	None	0	t	0.388	0	0.077	0.079	HPD-0.1%-	0.0068278	0.0836499	-0.147	-0.15	0	-0.002
258	Fe2O3HPN/AAmoxicillin	2.67055	76.4048	-2.66626	0.935267	1	0.064994	CHEMBL1082	Fe2O3	HP	N/A	Amoxicillin	MIC ug.mL-1	-1	50	MBC (uM)	Helicobacter pylori	n.d	HP	Gram-	GIT	Bacillus sbtilis	MD	N/A	None	None	0	t	0.324	0	0.077	0.079	HPD-0.1%-	0.0068278	0.0836499	-0.147	-0.15	0	-0.002
259	AgHPN/AAmoxicillin	3.4221	77.1563	-1.91471	0.968388	1	0.128453	CHEMBL1082	Ag	HP	N/A	Amoxicillin	MIC ug.mL-1	-1	50	MBC (uM)	Helicobacter pylori	n.d	HP	Gram-	GIT	Bacillus subtilis	ATCC6633	Spherical	None	None	0	t	0.324	0	0.077	0.079	HPD-0.1%-	0.0068278	0.0836499	-0.147	-0.135	-0.001	-0.002
260	CuOHPN/AAmoxicillin	2.38445	76.1186	-2.95236	0.915634	1	0.0496249	CHEMBL1082	CuO	HP	N/A	Amoxicillin	log10CFU/ml -	-1	1.979	MBC (uM)	Helicobacter pylori	J99	HP	Gram-	GIT	Bacillus sbtilis	MD	N/A	None	None	0	v	0.259	0	0.077	0.079	HPD-0.1%-	0.0068278	0.0836499	-0.147	-0.15	0	0.001
261	CuOHPN/AAmoxicillin	2.67055	76.4048	-2.66626	0.935267	1	0.064994	CHEMBL1082	CuO	HP	N/A	Amoxicillin	MIC ug.mL-1	-1	50	MBC (uM)	Helicobacter pylori	n.d	HP	Gram-	GIT	Bacillus sbtilis	MD	N/A	None	None	0	t	0.324	0	0.077	0.079	HPD-0.1%-	0.0068278	0.0836499	-0.147	-0.15	0	-0.002
262	CuHPN/AAmoxicillin	0.90142	74.6356	-4.43539	0.711241	1	0.0117116	CHEMBL1082	Cu	HP	N/A	Amoxicillin	Activity mm	1	21.554	MBC (uM)	Helicobacter pylori	n.d	HP	Gram-	GIT	Bacillus subtilis	ATCC6633	Spherical	None	None	0	t	0.227	0	0.077	0.079	HPD-0.1%-	0.0068278	0.0836499	-0.147	-0.15	-0.001	-0.002
263	CuOHPN/AAmoxicillin	2.67055	76.4048	-2.66626	0.935267	1	0.064994	CHEMBL1082	CuO	HP	N/A	Amoxicillin	MIC ug.mL-1	-1	50	MBC (uM)	Helicobacter pylori	n.d	HP	Gram-	GIT	Bacillus sbtilis	MD	N/A	None	None	0	v	0.324	0	0.077	0.079	HPD-0.1%-	0.0068278	0.0836499	-0.147	-0.15	0	-0.002
264	CuIHPN/AAmoxicillin	3.5538	77.288	-1.78301	0.97218	1	0.143932	CHEMBL1082	CuI	HP	N/A	Amoxicillin	MIC ug.mL-1	-1	50	MBC (uM)	Helicobacter pylori	n.d	HP	Gram-	GIT	Bacillus subtilis	ATCC6633	N/A	None	None	0	v	0.324	0	0.077	0.079	HPD-0.1%-	0.0068278	0.0836499	-0.143	-0.15	-0.001	-0.002
265	CuIHPN/AAmoxicillin	3.60421	77.3384	-1.73261	0.973512	1	0.150255	CHEMBL1082	CuI	HP	N/A	Amoxicillin	MBC ug ml-1	-1	117.213	MBC (uM)	Helicobacter pylori	n.d	HP	Gram-	GIT	Bacillus subtilis	ATCC6633	N/A	None	None	0	v	0.333	0	0.077	0.079	HPD-0.1%-	0.0068278	0.0836499	-0.143	-0.15	-0.001	-0.002
266	CuOHPN/AAmoxicillin	2.67055	76.4048	-2.66626	0.935267	1	0.064994	CHEMBL1082	CuO	HP	N/A	Amoxicillin	MIC ug.mL-1	-1	50	MBC (uM)	Helicobacter pylori	n.d	HP	Gram-	GIT	Bacillus sbtilis	MD	N/A	None	None	0	t	0.324	0	0.077	0.079	HPD-0.1%-	0.0068278	0.0836499	-0.147	-0.15	0	-0.002
267	CuOHPN/AAmoxicillin	2.67055	76.4048	-2.66626	0.935267	1	0.064994	CHEMBL1082	CuO	HP	N/A	Amoxicillin	MIC ug.mL-1	-1	50	MBC (uM)	Helicobacter pylori	n.d	HP	Gram-	GIT	Bacillus sbtilis	MD	N/A	None	None	0	t	0.324	0	0.077	0.079	HPD-0.1%-	0.0068278	0.0836499	-0.147	-0.15	0	-0.002
268	CuOHPN/AAmoxicillin	2.69653	76.4307	-2.64028	0.936821	1	0.0665904	CHEMBL1082	CuO	HP	N/A	Amoxicillin	MIC ug.mL-1	-1	50	MBC (uM)	Helicobacter pylori	ATCC43504	HP	Gram-	GIT	Bacillus sbtilis	MD	N/A	None	None	0	t	0.324	0	0.077	0.079	HPD-0.1%-	0.0068278	0.0836499	-0.147	-0.15	0	-0.001
269	CuOHPN/AAmoxicillin	1.12436	74.8586	-4.21246	0.754796	1	0.0145938	CHEMBL1082	CuO	HP	N/A	Amoxicillin	Activity uM	1	258.161	MBC (uM)	Helicobacter pylori	J99	HP	Gram-	GIT	Bacillus sbtilis	MD	N/A	None	None	0	t	0.034	0	0.077	0.079	HPD-0.1%-	0.0068278	0.0836499	-0.147	-0.15	0	0.001
270	CuOHPN/AAmoxicillin	2.67055	76.4048	-2.66626	0.935267	1	0.064994	CHEMBL1082	CuO	HP	N/A	Amoxicillin	MIC ug.mL-1	-1	50	MBC (uM)	Helicobacter pylori	n.d	HP	Gram-	GIT	Bacillus sbtilis	MD	N/A	None	None	0	v	0.324	0	0.077	0.079	HPD-0.1%-	0.0068278	0.0836499	-0.147	-0.15	0	-0.002
271	CuOHPN/AAmoxicillin	2.67055	76.4048	-2.66626	0.935267	1	0.064994	CHEMBL1082	CuO	HP	N/A	Amoxicillin	MIC ug.mL-1	-1	50	MBC (uM)	Helicobacter pylori	n.d	HP	Gram-	GIT	Bacillus sbtilis	MD	N/A	None	None	0	t	0.324	0	0.077	0.079	HPD-0.1%-	0.0068278	0.0836499	-0.147	-0.15	0	-0.002
272	CuHPN/AAmoxicillin	2.0047	75.7389	-3.33211	0.88129	1	0.0344858	CHEMBL1082	Cu	HP	N/A	Amoxicillin	MIC ug.mL-1	-1	50	MIC (uM)	Helicobacter pylori	n.d	HP	Gram-	GIT	Bacillus subtilis	ATCC6633	Spherical	None	None	0	v	0.424	0	0.077	0.079	HPD-0.1%-	0.0068278	0.0836499	-0.147	-0.15	-0.001	-0.002
273	CuHPN/AAmoxicillin	2.07191	75.8061	-3.26491	0.888142	1	0.0367949	CHEMBL1082	Cu	HP	N/A	Amoxicillin	MBC ug ml-1	-1	117.213	MIC (uM)	Helicobacter pylori	n.d	HP	Gram-	GIT	Bacillus subtilis	ATCC6633	Spherical	None	None	0	t	0.436	0	0.077	0.079	HPD-0.1%-	0.0068278	0.0836499	-0.147	-0.15	-0.001	-0.002
274	AgHPN/AAmoxicillin	3.98214	77.7163	-1.35467	0.981696	1	0.205108	CHEMBL1082	Ag	HP	N/A	Amoxicillin	MIC ug.mL-1	-1	50	MIC (uM)	Helicobacter pylori	n.d	HP	Gram-	GIT	Bacillus subtilis	ATCC6633	Spherical	None	None	0	v	0.424	0	0.077	0.079	HPD-0.1%-	0.0068278	0.0836499	-0.147	-0.135	-0.001	-0.002
275	AgHPN/AAmoxicillin	3.98214	77.7163	-1.35467	0.981696	1	0.205108	CHEMBL1082	Ag	HP	N/A	Amoxicillin	MIC ug.mL-1	-1	50	MIC (uM)	Helicobacter pylori	n.d	HP	Gram-	GIT	Bacillus subtilis	ATCC6633	Spherical	None	None	0	t	0.424	0	0.077	0.079	HPD-0.1%-	0.0068278	0.0836499	-0.147	-0.135	-0.001	-0.002
276	AgHPN/AAmoxicillin	4.44698	78.1812	-0.889834	0.988422	1	0.291144	CHEMBL1082	Ag	HP	N/A	Amoxicillin	IZ mm	1	5	MIC (uM)	Helicobacter pylori	n.d	HP	Gram-	GIT	Bacillus subtilis	ATCC6633	Spherical	None	None	0	t	0.507	0	0.077	0.079	HPD-0.1%-	0.0068278	0.0836499	-0.147	-0.135	-0.001	-0.002
277	CuOHPN/AAmoxicillin	3.2306	76.9648	-2.10622	0.96197	1	0.108494	CHEMBL1082	CuO	HP	N/A	Amoxicillin	MIC ug.mL-1	-1	50	MIC (uM)	Helicobacter pylori	n.d	HP	Gram-	GIT	Bacillus sbtilis	MD	N/A	None	None	0	v	0.424	0	0.077	0.079	HPD-0.1%-	0.0068278	0.0836499	-0.147	-0.15	0	-0.002
278	CuOHPN/AAmoxicillin	3.2306	76.9648	-2.10622	0.96197	1	0.108494	CHEMBL1082	CuO	HP	N/A	Amoxicillin	MIC ug.mL-1	-1	50	MIC (uM)	Helicobacter pylori	n.d	HP	Gram-	GIT	Bacillus sbtilis	MD	N/A	None	None	0	t	0.424	0	0.077	0.079	HPD-0.1%-	0.0068278	0.0836499	-0.147	-0.15	0	-0.002
279	CuOHPN/AAmoxicillin	3.2306	76.9648	-2.10622	0.96197	1	0.108494	CHEMBL1082	CuO	HP	N/A	Amoxicillin	MIC ug.mL-1	-1	50	MIC (uM)	Helicobacter pylori	n.d	HP	Gram-	GIT	Bacillus sbtilis	MD	N/A	None	None	0	t	0.424	0	0.077	0.079	HPD-0.1%-	0.0068278	0.0836499	-0.147	-0.15	0	-0.002
280	CuOHPN/AAmoxicillin	3.2306	76.9648	-2.10622	0.96197	1	0.108494	CHEMBL1082	CuO	HP	N/A	Amoxicillin	MIC ug.mL-1	-1	50	MIC (uM)	Helicobacter pylori	n.d	HP	Gram-	GIT	Bacillus sbtilis	MD	N/A	None	None	0	t	0.424	0	0.077	0.079	HPD-0.1%-	0.0068278	0.0836499	-0.147	-0.15	0	-0.002
281	CuIHPN/AAmoxicillin	4.11384	77.848	-1.22297	0.983918	1	0.227415	CHEMBL1082	CuI	HP	N/A	Amoxicillin	MIC ug.mL-1	-1	50	MIC (uM)	Helicobacter pylori	n.d	HP	Gram-	GIT	Bacillus subtilis	ATCC6633	N/A	None	None	0	t	0.424	0	0.077	0.079	HPD-0.1%-	0.0068278	0.0836499	-0.143	-0.15	-0.001	-0.002
282	CuIHPN/AAmoxicillin	4.11384	77.848	-1.22297	0.983918	1	0.227415	CHEMBL1082	CuI	HP	N/A	Amoxicillin	MIC ug.mL-1	-1	50	MIC (uM)	Helicobacter pylori	n.d	HP	Gram-	GIT	Bacillus subtilis	ATCC6633	N/A	None	None	0	t	0.424	0	0.077	0.079	HPD-0.1%-	0.0068278	0.0836499	-0.143	-0.15	-0.001	-0.002
283	CuOHPN/AAmoxicillin	3.2306	76.9648	-2.10622	0.96197	1	0.108494	CHEMBL1082	CuO	HP	N/A	Amoxicillin	MIC ug.mL-1	-1	50	MIC (uM)	Helicobacter pylori	n.d	HP	Gram-	GIT	Bacillus sbtilis	MD	N/A	None	None	0	t	0.424	0	0.077	0.079	HPD-0.1%-	0.0068278	0.0836499	-0.147	-0.15	0	-0.002
284	CuOHPN/AAmoxicillin	3.2306	76.9648	-2.10622	0.96197	1	0.108494	CHEMBL1082	CuO	HP	N/A	Amoxicillin	MIC ug.mL-1	-1	50	MIC (uM)	Helicobacter pylori	n.d	HP	Gram-	GIT	Bacillus sbtilis	MD	N/A	None	None	0	t	0.424	0	0.077	0.079	HPD-0.1%-	0.0068278	0.0836499	-0.147	-0.15	0	-0.002
285	CuOHPN/AAmoxicillin	3.2306	76.9648	-2.10622	0.96197	1	0.108494	CHEMBL1082	CuO	HP	N/A	Amoxicillin	MIC ug.mL-1	-1	50	MIC (uM)	Helicobacter pylori	n.d	HP	Gram-	GIT	Bacillus sbtilis	MD	N/A	None	None	0	t	0.424	0	0.077	0.079	HPD-0.1%-	0.0068278	0.0836499	-0.147	-0.15	0	-0.002
286	CuOHPN/AAmoxicillin	3.2306	76.9648	-2.10622	0.96197	1	0.108494	CHEMBL1082	CuO	HP	N/A	Amoxicillin	MIC ug.mL-1	-1	50	MIC (uM)	Helicobacter pylori	n.d	HP	Gram-	GIT	Bacillus sbtilis	MD	N/A	None	None	0	t	0.424	0	0.077	0.079	HPD-0.1%-	0.0068278	0.0836499	-0.147	-0.15	0	-0.002
287	CuOHPN/AAmoxicillin	3.2306	76.9648	-2.10622	0.96197	1	0.108494	CHEMBL1082	CuO	HP	N/A	Amoxicillin	MIC ug.mL-1	-1	50	MIC (uM)	Helicobacter pylori	n.d	HP	Gram-	GIT	Bacillus sbtilis	MD	N/A	None	None	0	t	0.424	0	0.077	0.079	HPD-0.1%-	0.0068278	0.0836499	-0.147	-0.15	0	-0.002
288	AgMTN/AAmoxicillin	0.206882	25.4095	1.15871	0.551537	1	0.761098	CHEMBL1082	Ag	MT	N/A	Amoxicillin	FC -	1	5	MIC (uM)	Mycobacterium tuberculosis	n.d	MT	Gram-	Respiratory	Bacillus subtilis	ATCC6633	Spherical	None	None	0	t	0.082	0	0.03	0.032	MTD-0.1%-	0.0084784	0.0384648	-0.147	-0.135	-0.001	-0.002
289	AgNGN/AAmoxicillin	2.90502	69.7332	-0.881083	0.948094	1	0.292953	CHEMBL1082	Ag	NG	N/A	Amoxicillin	MIC ug.mL-1	-1	50	MBC (uM)	Neisseria gonorrhoeae	n.d	NG	Gram-	Systemic	Bacillus subtilis	ATCC6633	Spherical	None	None	0	t	0.324	0	0.07	0.072	NGD-0.1%-	0.00733279	0.0772201	-0.147	-0.135	-0.001	0
290	CuNGN/AAmoxicillin	0.927573	67.7558	-2.85853	0.716583	1	0.0542423	CHEMBL1082	Cu	NG	N/A	Amoxicillin	MIC ug.mL-1	-1	50	MBC (uM)	Neisseria gonorrhoeae	n.d	NG	Gram-	Systemic	Bacillus subtilis	ATCC6633	Spherical	None	None	0	t	0.324	0	0.07	0.072	NGD-0.1%-	0.00733279	0.0772201	-0.147	-0.15	-0.001	0
291	CuONMN/AAmoxicillin	3.12204	74.8992	-1.75772	0.957793	1	0.147076	CHEMBL1082	CuO	NM	N/A	Amoxicillin	MIC ug.mL-1	-1	50	MIC (uM)	Neisseria meningitidis	n.d	NM	Gram-	Systemic	Bacillus sbtilis	MD	N/A	None	None	0	t	0.424	0	0.075	0.077	NMD-0.1%-	0.00697024	0.0818278	-0.147	-0.15	0	0
292	CuONMN/AAmoxicillin	3.12204	74.8992	-1.75772	0.957793	1	0.147076	CHEMBL1082	CuO	NM	N/A	Amoxicillin	MIC ug.mL-1	-1	50	MIC (uM)	Neisseria meningitidis	n.d	NM	Gram-	Systemic	Bacillus sbtilis	MD	N/A	None	None	0	t	0.424	0	0.075	0.077	NMD-0.1%-	0.00697024	0.0818278	-0.147	-0.15	0	0
293	CuOPGN/AAmoxicillin	3.17286	75.8959	-1.99051	0.9598	1	0.120203	CHEMBL1082	CuO	PG	N/A	Amoxicillin	MIC ug.mL-1	-1	50	MIC (uM)	Porphyromonas gingivalis	n.d	PG	Gram-	Systemic	Escherichia coli	MD	N/A	None	None	0	v	0.424	0	0.076	0.078	PGD-0.1%-	0.00687904	0.0827085	-0.147	-0.15	0	-0.002
294	AuPAPDT/AChAmoxicillin	7.10848	22.0632	7.19721	0.999183	1	0.999252	CHEMBL1082	Au	PA	PDT/ACh	Amoxicillin	MBC mg/L	-1	71.7	MBC (uM)	Pseudomonas aeruginosa	n.d	PA	Gram-	Systemic	Pseudomonas aeruginosa	MDR	Spherical	Double	Monomer	0	t	0.186	0	0.021	0.022	PAD-0.1%-	0.00780707	0.0289235	-0.143	-0.109	-0.001	-0.001
295	AuPAPDT/DMBAmoxicillin	5.79018	20.7449	5.87891	0.996952	1	0.99721	CHEMBL1082	Au	PA	PDT/DMB	Amoxicillin	MBC mg/L	-1	71.7	MBC (uM)	Pseudomonas aeruginosa	n.d	PA	Gram-	Systemic	Pseudomonas aeruginosa	MDR	Spherical	Double	Monomer	0	t	0.186	0	0.021	0.022	PAD-0.1%-	0.00780707	0.0289235	-0.143	-0.119	-0.001	-0.001
296	CuOPAN/AAmoxicillin	1.61905	16.5738	1.70778	0.834664	1	0.846548	CHEMBL1082	CuO	PA	N/A	Amoxicillin	MIC ug.mL-1	-1	50	MBC (uM)	Pseudomonas aeruginosa	ATCC27863	PA	Gram-	Systemic	Pseudomonas aeruginosa	MD	N/A	None	None	0	v	0.324	0	0.021	0.022	PAD-0.1%-	0.00780707	0.0289235	-0.147	-0.15	0	0
297	CuOPAN/AAmoxicillin	1.97747	16.9322	2.06621	0.878412	1	0.887575	CHEMBL1082	CuO	PA	N/A	Amoxicillin	IZ mm	1	5	MBC (uM)	Pseudomonas aeruginosa	ATCC27863	PA	Gram-	Systemic	Pseudomonas aeruginosa	MD	N/A	None	None	0	t	0.388	0	0.021	0.022	PAD-0.1%-	0.00780707	0.0289235	-0.147	-0.15	0	0
298	CuOPAN/AAmoxicillin	1.61905	16.5738	1.70778	0.834664	1	0.846548	CHEMBL1082	CuO	PA	N/A	Amoxicillin	MIC ug.mL-1	-1	50	MBC (uM)	Pseudomonas aeruginosa	51170	PA	Gram-	Systemic	Pseudomonas aeruginosa	MD	N/A	None	None	0	t	0.324	0	0.021	0.022	PAD-0.1%-	0.00780707	0.0289235	-0.147	-0.15	0	0
299	AgPAGlucoseAmoxicillin	2.48311	17.4378	2.57184	0.922949	1	0.929027	CHEMBL1082	Ag	PA	Glucose	Amoxicillin	MIC ug.mL-1	-1	50	MIC (uM)	Pseudomonas aeruginosa	MTCC 2642	PA	Gram-	Systemic	Pseudomonas aeruginosa	ATCC27853	Spherical	Single	Monomer	0	t	0.424	0	0.021	0.022	PAD-0.1%-	0.00780707	0.0289235	-0.144	-0.15	-0.001	-0.002
300	CuOPAN/AAmoxicillin	2.0752	17.0299	2.16393	0.888469	1	0.896963	CHEMBL1082	CuO	PA	N/A	Amoxicillin	MIC ug.mL-1	-1	50	MIC (uM)	Pseudomonas aeruginosa	CIP 82118	PA	Gram-	Systemic	Pseudomonas aeruginosa	MD	N/A	None	None	0	v	0.424	0	0.021	0.022	PAD-0.1%-	0.00780707	0.0289235	-0.147	-0.15	0	-0.004
301	ZnOTYN/AAmoxicillin	3.58225	8.4174	0.909209	0.972939	0.999779	0.712838	CHEMBL1082	ZnO	TY	N/A	Amoxicillin	IZ mm	1	5	MBC (uM)	Salmonella enterica subsp. enterica serovar Typhi	n.d	TY	Gram	Systemic	Bacillus sbtilis	MD	N/A	None	None	0	t	0.388	0	0.013	0.014	TYD-0.1%-	0.0063368	0.0195017	-0.147	-0.15	0	-0.002
302	CuOTYN/AAmoxicillin	3.58225	8.4174	0.909209	0.972939	0.999779	0.712838	CHEMBL1082	CuO	TY	N/A	Amoxicillin	IZ mm	1	5	MBC (uM)	Salmonella enterica subsp. enterica serovar Typhi	n.d	TY	Gram	Systemic	Bacillus sbtilis	MD	N/A	None	None	0	t	0.388	0	0.013	0.014	TYD-0.1%-	0.0063368	0.0195017	-0.147	-0.15	0	-0.002
303	Fe2O3TYN/AAmoxicillin	3.58225	8.4174	0.909209	0.972939	0.999779	0.712838	CHEMBL1082	Fe2O3	TY	N/A	Amoxicillin	IZ mm	1	5	MBC (uM)	Salmonella enterica subsp. enterica serovar Typhi	n.d	TY	Gram	Systemic	Bacillus sbtilis	MD	N/A	None	None	0	t	0.388	0	0.013	0.014	TYD-0.1%-	0.0063368	0.0195017	-0.147	-0.15	0	-0.002
304	CuOTYN/AAmoxicillin	3.30174	8.13689	0.628703	0.964488	0.999708	0.652195	CHEMBL1082	CuO	TY	N/A	Amoxicillin	MIC ug.mL-1	-1	50	MBC (uM)	Salmonella enterica subsp. enterica serovar Typhi	MTCC 1251	TY	Gram	Systemic	Bacillus sbtilis	MD	N/A	None	None	0	t	0.324	0	0.013	0.014	TYD-0.1%-	0.0063368	0.0195017	-0.147	-0.15	0	0.001
305	CuOTYN/AAmoxicillin	3.58225	8.4174	0.909209	0.972939	0.999779	0.712838	CHEMBL1082	CuO	TY	N/A	Amoxicillin	IZ mm	1	5	MBC (uM)	Salmonella enterica subsp. enterica serovar Typhi	n.d	TY	Gram	Systemic	Bacillus sbtilis	MD	N/A	None	None	0	t	0.388	0	0.013	0.014	TYD-0.1%-	0.0063368	0.0195017	-0.147	-0.15	0	-0.002
306	CuTYN/AAmoxicillin	2.55797	7.39312	-0.115071	0.928107	0.999385	0.471264	CHEMBL1082	Cu	TY	N/A	Amoxicillin	MIC ug.mL-1	-1	50	MIC (uM)	Salmonella enterica subsp. enterica serovar Typhi	n.d	TY	Gram	Systemic	Bacillus subtilis	ATCC6633	Spherical	None	None	0	v	0.424	0	0.013	0.014	TYD-0.1%-	0.0063368	0.0195017	-0.147	-0.15	-0.001	-0.002
307	AgTYN/AAmoxicillin	4.53541	9.37056	1.86237	0.989391	0.999915	0.865573	CHEMBL1082	Ag	TY	N/A	Amoxicillin	MIC ug.mL-1	-1	50	MIC (uM)	Salmonella enterica subsp. enterica serovar Typhi	n.d	TY	Gram	Systemic	Bacillus subtilis	ATCC6633	Spherical	None	None	0	t	0.424	0	0.013	0.014	TYD-0.1%-	0.0063368	0.0195017	-0.147	-0.135	-0.001	-0.002
308	CuOTYN/AAmoxicillin	4.32662	9.16176	1.65358	0.98696	0.999895	0.839374	CHEMBL1082	CuO	TY	N/A	Amoxicillin	IZ mm	1	5	MIC (uM)	Salmonella enterica subsp. enterica serovar Typhi	MTCC 1251	TY	Gram	Systemic	Bacillus sbtilis	MD	N/A	None	None	0	t	0.507	0	0.013	0.014	TYD-0.1%-	0.0063368	0.0195017	-0.147	-0.15	0	0.001
309	CuITYN/AAmoxicillin	4.66711	9.50226	1.99407	0.990688	0.999925	0.880173	CHEMBL1082	CuI	TY	N/A	Amoxicillin	MIC ug.mL-1	-1	50	MIC (uM)	Salmonella enterica subsp. enterica serovar Typhi	n.d	TY	Gram	Systemic	Bacillus subtilis	ATCC6633	N/A	None	None	0	t	0.424	0	0.013	0.014	TYD-0.1%-	0.0063368	0.0195017	-0.143	-0.15	-0.001	-0.002
310	CuOTYN/AAmoxicillin	3.80983	8.64498	1.1368	0.978328	0.999824	0.757091	CHEMBL1082	CuO	TY	N/A	Amoxicillin	MIC ug.mL-1	-1	50	MIC (uM)	Salmonella enterica subsp. enterica serovar Typhi	DIRW	TY	Gram	Systemic	Bacillus sbtilis	MD	N/A	None	None	0	v	0.424	0	0.013	0.014	TYD-0.1%-	0.0063368	0.0195017	-0.147	-0.15	0	-0.001
311	CdSTYN/AAmoxicillin	3.35762	8.19277	0.684585	0.966354	0.999723	0.664761	CHEMBL1082	CdS	TY	N/A	Amoxicillin	IZ mm	1	5	IC50 (uM)	Salmonella enterica subsp. enterica serovar Typhimurium	n.d	TY	Gram	Systemic	Escherichia coli	K-12	Spherical	None	None	0	t	0.096	0	0.013	0.014	TYD-0.1%-	0.0063368	0.0195017	-0.147	-0.13	-0.001	-0.002
312	CdSTYN/AAmoxicillin	4.99294	9.82809	2.3199	0.99326	0.999946	0.910512	CHEMBL1082	CdS	TY	N/A	Amoxicillin	IZ mm	1	5	MBC (uM)	Salmonella enterica subsp. enterica serovar Typhimurium	n.d	TY	Gram	Systemic	Escherichia coli	K-12	Spherical	None	None	0	t	0.388	0	0.013	0.014	TYD-0.1%-	0.0063368	0.0195017	-0.147	-0.13	-0.001	-0.002
313	CdOTYN/AAmoxicillin	2.35635	7.1915	-0.316686	0.913438	0.999248	0.421484	CHEMBL1082	CdO	TY	N/A	Amoxicillin	IZ mm	1	5	MBC (uM)	Salmonella enterica subsp. enterica serovar Typhimurium	n.d	TY	Gram	Systemic	Escherichia coli	K-12	Spherical	None	None	0	v	0.388	0	0.013	0.014	TYD-0.1%-	0.0063368	0.0195017	-0.147	-0.15	-0.001	-0.002
314	CuITYN/AAmoxicillin	4.0811	8.91624	1.40806	0.983392	0.999866	0.803459	CHEMBL1082	CuI	TY	N/A	Amoxicillin	MIC ug.mL-1	-1	50	MBC (uM)	Salmonella enterica subsp. enterica serovar Typhimurium	ATCC13311	TY	Gram	Systemic	Bacillus subtilis	ATCC6633	N/A	None	None	0	t	0.324	0	0.013	0.014	TYD-0.1%-	0.0063368	0.0195017	-0.143	-0.15	-0.001	-0.003
315	CuITYN/AAmoxicillin	4.43952	9.27467	1.76648	0.988336	0.999906	0.85402	CHEMBL1082	CuI	TY	N/A	Amoxicillin	IZ mm	1	5	MBC (uM)	Salmonella enterica subsp. enterica serovar Typhimurium	ATCC13311	TY	Gram	Systemic	Bacillus subtilis	ATCC6633	N/A	None	None	0	t	0.388	0	0.013	0.014	TYD-0.1%-	0.0063368	0.0195017	-0.143	-0.15	-0.001	-0.003
316	CuTYN/AAmoxicillin	0.72748	5.56263	-1.94556	0.674252	0.996176	0.125039	CHEMBL1082	Cu	TY	N/A	Amoxicillin	IC50 ug.mL-1	1	2000	MBC (uM)	Salmonella enterica subsp. enterica serovar Typhimurium	n.d	TY	Gram	Systemic	Escherichia coli	ATCC8739	Spherical	None	None	0	t	0.003	0	0.013	0.014	TYD-0.1%-	0.0063368	0.0195017	-0.146	-0.15	-0.001	-0.002
317	AgTYPVPAmoxicillin	3.78386	8.61901	1.11082	0.977771	0.999819	0.752283	CHEMBL1082	Ag	TY	PVP	Amoxicillin	MIC ug.mL-1	-1	50	MIC (uM)	Salmonella enterica subsp. enterica serovar Typhimurium	n.d	TY	Gram	Systemic	Escherichia coli	ATCC25922	Spherical	Single	Polymer	0	v	0.424	0	0.013	0.014	TYD-0.1%-	0.0063368	0.0195017	-0.147	-0.15	0	-0.002
318	AgTYGlucoseAmoxicillin	3.78386	8.61901	1.11082	0.977771	0.999819	0.752283	CHEMBL1082	Ag	TY	Glucose	Amoxicillin	MIC ug.mL-1	-1	50	MIC (uM)	Salmonella enterica subsp. enterica serovar Typhimurium	n.d	TY	Gram	Systemic	Escherichia coli	ATCC25922	Spherical	Single	Monomer	0	t	0.424	0	0.013	0.014	TYD-0.1%-	0.0063368	0.0195017	-0.147	-0.15	0	-0.002
319	CuTYN/AAmoxicillin	2.58394	7.41909	-0.0890978	0.929821	0.999401	0.47774	CHEMBL1082	Cu	TY	N/A	Amoxicillin	MIC ug.mL-1	-1	50	MIC (uM)	Salmonella enterica subsp. enterica serovar Typhimurium	isolate 11	TY	Gram	Systemic	Bacillus subtilis	ATCC6633	Spherical	None	None	0	t	0.424	0	0.013	0.014	TYD-0.1%-	0.0063368	0.0195017	-0.147	-0.15	-0.001	-0.001
320	AgTYN/AAmoxicillin	5.7613	10.5965	3.08827	0.996863	0.999975	0.956406	CHEMBL1082	Ag	TY	N/A	Amoxicillin	MIC ug.mL-1	-1	50	MIC (uM)	Salmonella enterica subsp. enterica serovar Typhimurium	n.d	TY	Gram	Systemic	Escherichia coli	ATCC25922	Spherical	None	None	0	v	0.424	0	0.013	0.014	TYD-0.1%-	0.0063368	0.0195017	-0.147	-0.135	0	-0.002
321	CdSPNN/AAmoxicillin	2.08161	71.1789	-1.54694	0.889103	1	0.175529	CHEMBL1082	CdS	PN	N/A	Amoxicillin	MIC ug.mL-1	-1	50	IC50 (uM)	Streptococcus pneumoniae	P-52181	PN	Gram	Respiratory	Escherichia coli	K-12	Spherical	None	None	0	t	0.08	0	0.072	0.074	PND-0.1%-	0.00745884	0.0793328	-0.147	-0.13	-0.001	0.001
322	CdSPNN/AAmoxicillin	2.11521	71.2125	-1.51333	0.892373	1	0.180445	CHEMBL1082	CdS	PN	N/A	Amoxicillin	MIC90 ug.mL-1	-1	34.891	IC50 (uM)	Streptococcus pneumoniae	serotype 11A	PN	Gram	Respiratory	Escherichia coli	K-12	Spherical	None	None	0	t	0.086	0	0.072	0.074	PND-0.1%-	0.00745884	0.0793328	-0.147	-0.13	-0.001	0.001
323	CdOPNN/AAmoxicillin	-0.644591	68.4527	-4.27314	0.34421	1	0.0137464	CHEMBL1082	CdO	PN	N/A	Amoxicillin	log10CFU/ml -	-1	1.979	IC50 (uM)	Streptococcus pneumoniae	P-52181	PN	Gram	Respiratory	Escherichia coli	K-12	Spherical	None	None	0	t	0.064	0	0.072	0.074	PND-0.1%-	0.00745884	0.0793328	-0.147	-0.15	-0.001	0.001
324	CdOPNN/AAmoxicillin	-0.580958	68.5164	-4.2095	0.358712	1	0.0146364	CHEMBL1082	CdO	PN	N/A	Amoxicillin	MIC ug.mL-1	-1	50	IC50 (uM)	Streptococcus pneumoniae	serotype 35B	PN	Gram	Respiratory	Escherichia coli	K-12	Spherical	None	None	0	v	0.08	0	0.072	0.074	PND-0.1%-	0.00745884	0.0793328	-0.147	-0.15	-0.001	0
325	CuOPNN/AAmoxicillin	2.99821	72.0955	-0.630334	0.952493	1	0.347435	CHEMBL1082	CuO	PN	N/A	Amoxicillin	MIC50 ug.mL-1	-1	21.529	IC50 (uM)	Streptococcus pneumoniae	serotype 6B	PN	Gram	Respiratory	Escherichia coli	ATCC25254	N/A	None	None	0	t	0.093	0	0.072	0.074	PND-0.1%-	0.00745884	0.0793328	-0.145	-0.15	0.001	0
326	La2O3PNN/AAmoxicillin	2.94626	72.0436	-0.682281	0.950087	1	0.335752	CHEMBL1082	La2O3	PN	N/A	Amoxicillin	MIC50 ug.mL-1	-1	21.529	IC50 (uM)	Streptococcus pneumoniae	serotype 3	PN	Gram	Respiratory	Escherichia coli	ATCC25254	N/A	None	None	0	t	0.093	0	0.072	0.074	PND-0.1%-	0.00745884	0.0793328	-0.145	-0.15	0.001	-0.002
327	Al2O3PNN/AAmoxicillin	2.62704	71.7244	-1.0015	0.932582	1	0.268646	CHEMBL1082	Al2O3	PN	N/A	Amoxicillin	Activity %	1	70	IC50 (uM)	Streptococcus pneumoniae	serotype 6C	PN	Gram	Respiratory	Escherichia coli	ATCC25254	N/A	None	None	0	t	0.036	0	0.072	0.074	PND-0.1%-	0.00745884	0.0793328	-0.145	-0.15	0.001	-0.002
328	AuPNPDT/MelAmoxicillin	9.49002	78.5873	5.86147	0.999924	1	0.997161	CHEMBL1082	Au	PN	PDT/Mel	Amoxicillin	Activity %	1	70	MBC (uM)	Streptococcus pneumoniae	serotype 19A	PN	Gram	Respiratory	Escherichia coli	ATCC11775	Spherical	Double	Monomer	0	t	0.146	0	0.072	0.074	PND-0.1%-	0.00745884	0.0793328	-0.143	-0.093	-0.001	0.003
329	AuPNPDT/MelAmoxicillin	9.36015	78.4575	5.73161	0.999914	1	0.996769	CHEMBL1082	Au	PN	PDT/Mel	Amoxicillin	Activity %	1	70	MBC (uM)	Streptococcus pneumoniae	n.d	PN	Gram	Respiratory	Escherichia coli	MDR	Spherical	Double	Monomer	0	t	0.146	0	0.072	0.074	PND-0.1%-	0.00745884	0.0793328	-0.143	-0.093	-0.001	-0.002
330	AuPNPDT/MelAmoxicillin	10.0449	79.1423	6.4164	0.999957	1	0.998368	CHEMBL1082	Au	PN	PDT/Mel	Amoxicillin	log10CFU/ml -	-1	1.979	MBC (uM)	Streptococcus pneumoniae	P-54988	PN	Gram	Respiratory	Escherichia coli	MDR	Spherical	Double	Monomer	0	v	0.259	0	0.072	0.074	PND-0.1%-	0.00745884	0.0793328	-0.143	-0.093	-0.001	0
331	AuPNPDT/AChAmoxicillin	7.38075	76.4781	3.7522	0.999377	1	0.977072	CHEMBL1082	Au	PN	PDT/ACh	Amoxicillin	Activity %	1	70	MBC (uM)	Streptococcus pneumoniae	serotype 19A	PN	Gram	Respiratory	Escherichia coli	ATCC11775	Spherical	Double	Monomer	0	t	0.146	0	0.072	0.074	PND-0.1%-	0.00745884	0.0793328	-0.143	-0.109	-0.001	0.003
332	AuPNPDT/AChAmoxicillin	7.25088	76.3482	3.62233	0.999291	1	0.973975	CHEMBL1082	Au	PN	PDT/ACh	Amoxicillin	Activity %	1	70	MBC (uM)	Streptococcus pneumoniae	n.d	PN	Gram	Respiratory	Escherichia coli	MDR	Spherical	Double	Monomer	0	t	0.146	0	0.072	0.074	PND-0.1%-	0.00745884	0.0793328	-0.143	-0.109	-0.001	-0.002
333	AuPNPDT/AChAmoxicillin	7.93567	77.033	4.30713	0.999642	1	0.986707	CHEMBL1082	Au	PN	PDT/ACh	Amoxicillin	log10CFU/ml -	-1	1.979	MBC (uM)	Streptococcus pneumoniae	P-54988	PN	Gram	Respiratory	Escherichia coli	MDR	Spherical	Double	Monomer	0	t	0.259	0	0.072	0.074	PND-0.1%-	0.00745884	0.0793328	-0.143	-0.109	-0.001	0
334	AuPNPDT/AChAmoxicillin	7.30282	76.4002	3.67428	0.999327	1	0.97526	CHEMBL1082	Au	PN	PDT/ACh	Amoxicillin	Activity %	1	70	MBC (uM)	Streptococcus pneumoniae	serotype 35B	PN	Gram	Respiratory	Escherichia coli	MDR	Spherical	Double	Monomer	0	v	0.146	0	0.072	0.074	PND-0.1%-	0.00745884	0.0793328	-0.143	-0.109	-0.001	0
335	AuPNPDT/CQAmoxicillin	7.64637	76.7437	4.01782	0.999522	1	0.982326	CHEMBL1082	Au	PN	PDT/CQ	Amoxicillin	Activity %	1	70	MBC (uM)	Streptococcus pneumoniae	n.d	PN	Gram	Respiratory	Escherichia coli	MDR	Spherical	Double	Monomer	0	t	0.146	0	0.072	0.074	PND-0.1%-	0.00745884	0.0793328	-0.143	-0.106	-0.001	-0.002
336	AuPNPDT/CQAmoxicillin	8.33116	77.4285	4.70262	0.999759	1	0.99101	CHEMBL1082	Au	PN	PDT/CQ	Amoxicillin	log10CFU/ml -	-1	1.979	MBC (uM)	Streptococcus pneumoniae	P-54988	PN	Gram	Respiratory	Escherichia coli	MDR	Spherical	Double	Monomer	0	t	0.259	0	0.072	0.074	PND-0.1%-	0.00745884	0.0793328	-0.143	-0.106	-0.001	0
337	AuPNPDT/CQAmoxicillin	8.99558	78.0929	5.36704	0.999876	1	0.995354	CHEMBL1082	Au	PN	PDT/CQ	Amoxicillin	MIC50 ug.mL-1	-1	21.529	MBC (uM)	Streptococcus pneumoniae	serotype 11A	PN	Gram	Respiratory	Escherichia coli	MDR	Spherical	Double	Monomer	0	t	0.373	0	0.072	0.074	PND-0.1%-	0.00745884	0.0793328	-0.143	-0.106	-0.001	0.001
338	AuPNPDT/CPBAmoxicillin	8.41731	77.5146	4.78876	0.999779	1	0.991746	CHEMBL1082	Au	PN	PDT/CPB	Amoxicillin	MIC90 ug.mL-1	-1	34.891	MBC (uM)	Streptococcus pneumoniae	serotype 6B	PN	Gram	Respiratory	Escherichia coli	ATCC11775	Spherical	Double	Monomer	0	v	0.345	0	0.072	0.074	PND-0.1%-	0.00745884	0.0793328	-0.143	-0.109	-0.001	0
339	AuPNPDT/GAmoxicillin	8.17368	77.271	4.54514	0.999718	1	0.989493	CHEMBL1082	Au	PN	PDT/G	Amoxicillin	Activity %	1	70	MBC (uM)	Streptococcus pneumoniae	n.d	PN	Gram	Respiratory	Escherichia coli	MDR	Spherical	Double	Monomer	0	t	0.146	0	0.072	0.074	PND-0.1%-	0.00745884	0.0793328	-0.143	-0.102	-0.001	-0.002
340	AuPNPDT/GAmoxicillin	8.85848	77.9558	5.22993	0.999858	1	0.994675	CHEMBL1082	Au	PN	PDT/G	Amoxicillin	log10CFU/ml -	-1	1.979	MBC (uM)	Streptococcus pneumoniae	P-54988	PN	Gram	Respiratory	Escherichia coli	MDR	Spherical	Double	Monomer	0	t	0.259	0	0.072	0.074	PND-0.1%-	0.00745884	0.0793328	-0.143	-0.102	-0.001	0
341	AuPNPDT/DMBAmoxicillin	5.93258	75.0299	2.30404	0.997355	1	0.909211	CHEMBL1082	Au	PN	PDT/DMB	Amoxicillin	Activity %	1	70	MBC (uM)	Streptococcus pneumoniae	n.d	PN	Gram	Respiratory	Escherichia coli	MDR	Spherical	Double	Monomer	0	t	0.146	0	0.072	0.074	PND-0.1%-	0.00745884	0.0793328	-0.143	-0.119	-0.001	-0.002
342	AuPNPDT/DMBAmoxicillin	7.04706	76.1444	3.41852	0.999131	1	0.968278	CHEMBL1082	Au	PN	PDT/DMB	Amoxicillin	MIC90 ug.mL-1	-1	34.891	MBC (uM)	Streptococcus pneumoniae	serotype 33	PN	Gram	Respiratory	Escherichia coli	MDR	Spherical	Double	Monomer	0	t	0.345	0	0.072	0.074	PND-0.1%-	0.00745884	0.0793328	-0.143	-0.119	-0.001	-0.002
343	AuPNPDT/DMBAmoxicillin	5.98453	75.0819	2.35598	0.997489	1	0.913409	CHEMBL1082	Au	PN	PDT/DMB	Amoxicillin	Activity %	1	70	MBC (uM)	Streptococcus pneumoniae	serotype 6B	PN	Gram	Respiratory	Escherichia coli	MDR	Spherical	Double	Monomer	0	t	0.146	0	0.072	0.074	PND-0.1%-	0.00745884	0.0793328	-0.143	-0.119	-0.001	0
344	AuPNPDT/CPBAmoxicillin	7.25088	76.3482	3.62233	0.999291	1	0.973975	CHEMBL1082	Au	PN	PDT/CPB	Amoxicillin	Activity %	1	70	MBC (uM)	Streptococcus pneumoniae	n.d	PN	Gram	Respiratory	Escherichia coli	MDR	Spherical	Double	Monomer	0	v	0.146	0	0.072	0.074	PND-0.1%-	0.00745884	0.0793328	-0.143	-0.109	-0.001	-0.002
345	AuPNPDT/CPBAmoxicillin	8.36536	77.4627	4.73681	0.999767	1	0.99131	CHEMBL1082	Au	PN	PDT/CPB	Amoxicillin	MIC90 ug.mL-1	-1	34.891	MBC (uM)	Streptococcus pneumoniae	serotype 33	PN	Gram	Respiratory	Escherichia coli	MDR	Spherical	Double	Monomer	0	t	0.345	0	0.072	0.074	PND-0.1%-	0.00745884	0.0793328	-0.143	-0.109	-0.001	-0.002
346	ZnOPNN/AAmoxicillin	1.98546	71.0828	-1.64308	0.879262	1	0.162046	CHEMBL1082	ZnO	PN	N/A	Amoxicillin	MIC ug.mL-1	-1	50	MBC (uM)	Streptococcus pneumoniae	ATCC700677	PN	Gram	Respiratory	Bacillus sbtilis	MD	N/A	None	None	0	v	0.324	0	0.072	0.074	PND-0.1%-	0.00745884	0.0793328	-0.147	-0.15	0	-0.001
347	ZnOPNN/AAmoxicillin	2.0771	71.1744	-1.55145	0.888657	1	0.174878	CHEMBL1082	ZnO	PN	N/A	Amoxicillin	MIC90 ug.mL-1	-1	34.891	MBC (uM)	Streptococcus pneumoniae	n.d	PN	Gram	Respiratory	Bacillus sbtilis	MD	N/A	None	None	0	t	0.345	0	0.072	0.074	PND-0.1%-	0.00745884	0.0793328	-0.147	-0.15	0	-0.002
348	ZnOPNN/AAmoxicillin	1.95949	71.0568	-1.66905	0.876478	1	0.15855	CHEMBL1082	ZnO	PN	N/A	Amoxicillin	MIC ug.mL-1	-1	50	MBC (uM)	Streptococcus pneumoniae	n.d	PN	Gram	Respiratory	Bacillus sbtilis	MD	N/A	None	None	0	t	0.324	0	0.072	0.074	PND-0.1%-	0.00745884	0.0793328	-0.147	-0.15	0	-0.002
349	ZnOPNN/AAmoxicillin	1.95949	71.0568	-1.66905	0.876478	1	0.15855	CHEMBL1082	ZnO	PN	N/A	Amoxicillin	MIC ug.mL-1	-1	50	MBC (uM)	Streptococcus pneumoniae	n.d	PN	Gram	Respiratory	Bacillus sbtilis	MD	N/A	None	None	0	t	0.324	0	0.072	0.074	PND-0.1%-	0.00745884	0.0793328	-0.147	-0.15	0	-0.002
350	AuPNPDTAmoxicillin	3.95514	73.0525	0.326595	0.981204	1	0.580931	CHEMBL1082	Au	PN	PDT	Amoxicillin	Activity %	1	70	MBC (uM)	Streptococcus pneumoniae	n.d	PN	Gram	Respiratory	Escherichia coli	MDR	Spherical	Single	Monomer	0	t	0.146	0	0.072	0.074	PND-0.1%-	0.00745884	0.0793328	-0.143	-0.134	-0.001	-0.002
351	AuPNPDTAmoxicillin	5.05591	74.1532	1.42736	0.993669	1	0.80649	CHEMBL1082	Au	PN	PDT	Amoxicillin	MIC ug.mL-1	-1	50	MBC (uM)	Streptococcus pneumoniae	R6	PN	Gram	Respiratory	Escherichia coli	MDR	Spherical	Single	Monomer	0	v	0.324	0	0.072	0.074	PND-0.1%-	0.00745884	0.0793328	-0.143	-0.134	-0.001	0.002
352	AuPNPDTAmoxicillin	3.95514	73.0525	0.326595	0.981204	1	0.580931	CHEMBL1082	Au	PN	PDT	Amoxicillin	Activity %	1	70	MBC (uM)	Streptococcus pneumoniae	serotype 15A	PN	Gram	Respiratory	Escherichia coli	MDR	Spherical	Single	Monomer	0	t	0.146	0	0.072	0.074	PND-0.1%-	0.00745884	0.0793328	-0.143	-0.134	-0.001	-0.002
353	AuPNPDTAmoxicillin	5.06962	74.167	1.44108	0.993754	1	0.808621	CHEMBL1082	Au	PN	PDT	Amoxicillin	MIC90 ug.mL-1	-1	34.891	MBC (uM)	Streptococcus pneumoniae	serotype 33	PN	Gram	Respiratory	Escherichia coli	MDR	Spherical	Single	Monomer	0	t	0.345	0	0.072	0.074	PND-0.1%-	0.00745884	0.0793328	-0.143	-0.134	-0.001	-0.002
354	AuPNPDTAmoxicillin	5.00396	74.1013	1.37541	0.993333	1	0.798254	CHEMBL1082	Au	PN	PDT	Amoxicillin	MIC ug.mL-1	-1	50	MBC (uM)	Streptococcus pneumoniae	serotype 7F	PN	Gram	Respiratory	Escherichia coli	MDR	Spherical	Single	Monomer	0	t	0.324	0	0.072	0.074	PND-0.1%-	0.00745884	0.0793328	-0.143	-0.134	-0.001	0
355	CdSPNN/AAmoxicillin	3.08408	72.1814	-0.544464	0.956231	1	0.36715	CHEMBL1082	CdS	PN	N/A	Amoxicillin	log10CFU/ml -	-1	1.979	MBC (uM)	Streptococcus pneumoniae	P-52181	PN	Gram	Respiratory	Escherichia coli	K-12	Spherical	None	None	0	v	0.259	0	0.072	0.074	PND-0.1%-	0.00745884	0.0793328	-0.147	-0.13	-0.001	0.001
356	CdSPNN/AAmoxicillin	2.37331	71.4706	-1.25523	0.91477	1	0.221796	CHEMBL1082	CdS	PN	N/A	Amoxicillin	Activity %	1	70	MBC (uM)	Streptococcus pneumoniae	serotype 3	PN	Gram	Respiratory	Escherichia coli	K-12	Spherical	None	None	0	t	0.146	0	0.072	0.074	PND-0.1%-	0.00745884	0.0793328	-0.147	-0.13	-0.001	-0.002
357	ZnOPNN/AAmoxicillin	1.72533	70.8227	-1.90321	0.848814	1	0.129745	CHEMBL1082	ZnO	PN	N/A	Amoxicillin	log10CFU/ml -	-1	1.979	MBC (uM)	Streptococcus pneumoniae	P-12698	PN	Gram	Respiratory	Escherichia coli	MD	N/A	None	None	0	t	0.259	0	0.072	0.074	PND-0.1%-	0.00745884	0.0793328	-0.147	-0.15	0	0.003
358	ZnOPNN/AAmoxicillin	2.03741	71.1347	-1.59113	0.884669	1	0.169224	CHEMBL1082	ZnO	PN	N/A	Amoxicillin	MIC ug.mL-1	-1	50	MBC (uM)	Streptococcus pneumoniae	serotype 11A	PN	Gram	Respiratory	Escherichia coli	MD	N/A	None	None	0	v	0.324	0	0.072	0.074	PND-0.1%-	0.00745884	0.0793328	-0.147	-0.15	0	0.001
359	CuOPNN/AAmoxicillin	1.11846	70.2158	-2.51009	0.753703	1	0.0751541	CHEMBL1082	CuO	PN	N/A	Amoxicillin	Activity %	1	70	MBC (uM)	Streptococcus pneumoniae	ATCC49619	PN	Gram	Respiratory	Bacillus sbtilis	MD	N/A	None	None	0	t	0.146	0	0.072	0.074	PND-0.1%-	0.00745884	0.0793328	-0.147	-0.15	0	0.004
360	CuOPNN/AAmoxicillin	2.0771	71.1744	-1.55145	0.888657	1	0.174878	CHEMBL1082	CuO	PN	N/A	Amoxicillin	MIC90 ug.mL-1	-1	34.891	MBC (uM)	Streptococcus pneumoniae	n.d	PN	Gram	Respiratory	Bacillus sbtilis	MD	N/A	None	None	0	v	0.345	0	0.072	0.074	PND-0.1%-	0.00745884	0.0793328	-0.147	-0.15	0	-0.002
361	CuOPNN/AAmoxicillin	1.95949	71.0568	-1.66905	0.876478	1	0.15855	CHEMBL1082	CuO	PN	N/A	Amoxicillin	MIC ug.mL-1	-1	50	MBC (uM)	Streptococcus pneumoniae	n.d	PN	Gram	Respiratory	Bacillus sbtilis	MD	N/A	None	None	0	v	0.324	0	0.072	0.074	PND-0.1%-	0.00745884	0.0793328	-0.147	-0.15	0	-0.002
362	CdOPNN/AAmoxicillin	0.447489	69.5448	-3.18106	0.610042	1	0.0398849	CHEMBL1082	CdO	PN	N/A	Amoxicillin	log10CFU/ml -	-1	1.979	MBC (uM)	Streptococcus pneumoniae	P-52181	PN	Gram	Respiratory	Escherichia coli	K-12	Spherical	None	None	0	t	0.259	0	0.072	0.074	PND-0.1%-	0.00745884	0.0793328	-0.147	-0.15	-0.001	0.001
363	CdOPNN/AAmoxicillin	1.13788	70.2352	-2.49066	0.757291	1	0.0765154	CHEMBL1082	CdO	PN	N/A	Amoxicillin	MIC50 ug.mL-1	-1	21.529	MBC (uM)	Streptococcus pneumoniae	serotype 19A	PN	Gram	Respiratory	Escherichia coli	K-12	Spherical	None	None	0	t	0.373	0	0.072	0.074	PND-0.1%-	0.00745884	0.0793328	-0.147	-0.15	-0.001	0.003
364	CuOPNN/AAmoxicillin	1.72533	70.8227	-1.90321	0.848814	1	0.129745	CHEMBL1082	CuO	PN	N/A	Amoxicillin	log10CFU/ml -	-1	1.979	MBC (uM)	Streptococcus pneumoniae	P-12698	PN	Gram	Respiratory	Escherichia coli	MD	N/A	None	None	0	t	0.259	0	0.072	0.074	PND-0.1%-	0.00745884	0.0793328	-0.147	-0.15	0	0.003
365	CuOPNN/AAmoxicillin	1.72533	70.8227	-1.90321	0.848814	1	0.129745	CHEMBL1082	CuO	PN	N/A	Amoxicillin	log10CFU/ml -	-1	1.979	MBC (uM)	Streptococcus pneumoniae	P-12698	PN	Gram	Respiratory	Escherichia coli	MD	N/A	None	None	0	t	0.259	0	0.072	0.074	PND-0.1%-	0.00745884	0.0793328	-0.147	-0.15	0	0.003
366	CuOPNN/AAmoxicillin	2.0771	71.1744	-1.55145	0.888657	1	0.174878	CHEMBL1082	CuO	PN	N/A	Amoxicillin	MIC90 ug.mL-1	-1	34.891	MBC (uM)	Streptococcus pneumoniae	serotype 6A/C	PN	Gram	Respiratory	Escherichia coli	MD	N/A	None	None	0	v	0.345	0	0.072	0.074	PND-0.1%-	0.00745884	0.0793328	-0.147	-0.15	0	-0.002
367	Fe2O3PNN/AAmoxicillin	2.08936	71.1867	-1.53919	0.889865	1	0.176654	CHEMBL1082	Fe2O3	PN	N/A	Amoxicillin	MIC ug.mL-1	-1	50	MBC (uM)	Streptococcus pneumoniae	serotype 19A	PN	Gram	Respiratory	Escherichia coli	MD	N/A	None	None	0	t	0.324	0	0.072	0.074	PND-0.1%-	0.00745884	0.0793328	-0.147	-0.15	0	0.003
368	Fe2O3PNN/AAmoxicillin	2.0771	71.1744	-1.55145	0.888657	1	0.174878	CHEMBL1082	Fe2O3	PN	N/A	Amoxicillin	MIC90 ug.mL-1	-1	34.891	MBC (uM)	Streptococcus pneumoniae	serotype 3	PN	Gram	Respiratory	Escherichia coli	MD	N/A	None	None	0	v	0.345	0	0.072	0.074	PND-0.1%-	0.00745884	0.0793328	-0.147	-0.15	0	-0.002
369	Fe2O3PNN/AAmoxicillin	2.0771	71.1744	-1.55145	0.888657	1	0.174878	CHEMBL1082	Fe2O3	PN	N/A	Amoxicillin	MIC90 ug.mL-1	-1	34.891	MBC (uM)	Streptococcus pneumoniae	serotype 6A/C	PN	Gram	Respiratory	Escherichia coli	MD	N/A	None	None	0	t	0.345	0	0.072	0.074	PND-0.1%-	0.00745884	0.0793328	-0.147	-0.15	0	-0.002
370	CuIPNN/AAmoxicillin	2.55663	71.654	-1.07191	0.928018	1	0.25504	CHEMBL1082	CuI	PN	N/A	Amoxicillin	log10CFU/ml -	-1	1.979	MBC (uM)	Streptococcus pneumoniae	P-52181	PN	Gram	Respiratory	Escherichia coli	K-12	N/A	None	None	0	t	0.259	0	0.072	0.074	PND-0.1%-	0.00745884	0.0793328	-0.143	-0.15	-0.001	0.001
371	CuIPNN/AAmoxicillin	3.24703	72.3444	-0.381518	0.962566	1	0.405761	CHEMBL1082	CuI	PN	N/A	Amoxicillin	MIC50 ug.mL-1	-1	21.529	MBC (uM)	Streptococcus pneumoniae	serotype 19A	PN	Gram	Respiratory	Escherichia coli	K-12	N/A	None	None	0	t	0.373	0	0.072	0.074	PND-0.1%-	0.00745884	0.0793328	-0.143	-0.15	-0.001	0.003
372	CuIPNN/AAmoxicillin	1.89781	70.9951	-1.73073	0.869644	1	0.150494	CHEMBL1082	CuI	PN	N/A	Amoxicillin	Activity %	1	70	MBC (uM)	Streptococcus pneumoniae	serotype 23B	PN	Gram	Respiratory	Escherichia coli	K-12	N/A	None	None	0	v	0.146	0	0.072	0.074	PND-0.1%-	0.00745884	0.0793328	-0.143	-0.15	-0.001	0
373	CuIPNN/AAmoxicillin	3.16911	72.2664	-0.459438	0.959655	1	0.387119	CHEMBL1082	CuI	PN	N/A	Amoxicillin	MIC50 ug.mL-1	-1	21.529	MBC (uM)	Streptococcus pneumoniae	serotype 7F	PN	Gram	Respiratory	Escherichia coli	K-12	N/A	None	None	0	t	0.373	0	0.072	0.074	PND-0.1%-	0.00745884	0.0793328	-0.143	-0.15	-0.001	0
374	Fe2O3PNN/AAmoxicillin	2.0771	71.1744	-1.55145	0.888657	1	0.174878	CHEMBL1082	Fe2O3	PN	N/A	Amoxicillin	MIC90 ug.mL-1	-1	34.891	MBC (uM)	Streptococcus pneumoniae	n.d	PN	Gram	Respiratory	Bacillus sbtilis	MD	N/A	None	None	0	t	0.345	0	0.072	0.074	PND-0.1%-	0.00745884	0.0793328	-0.147	-0.15	0	-0.002
375	Fe2O3PNN/AAmoxicillin	2.0771	71.1744	-1.55145	0.888657	1	0.174878	CHEMBL1082	Fe2O3	PN	N/A	Amoxicillin	MIC90 ug.mL-1	-1	34.891	MBC (uM)	Streptococcus pneumoniae	n.d	PN	Gram	Respiratory	Bacillus sbtilis	MD	N/A	None	None	0	t	0.345	0	0.072	0.074	PND-0.1%-	0.00745884	0.0793328	-0.147	-0.15	0	-0.002
376	Fe2O3PNN/AAmoxicillin	2.23391	71.3312	-1.39463	0.903254	1	0.198669	CHEMBL1082	Fe2O3	PN	N/A	Amoxicillin	MIC50 ug.mL-1	-1	21.529	MBC (uM)	Streptococcus pneumoniae	n.d	PN	Gram	Respiratory	Bacillus sbtilis	MD	N/A	None	None	0	v	0.373	0	0.072	0.074	PND-0.1%-	0.00745884	0.0793328	-0.147	-0.15	0	-0.002
377	Fe2O3PNN/AAmoxicillin	1.95949	71.0568	-1.66905	0.876478	1	0.15855	CHEMBL1082	Fe2O3	PN	N/A	Amoxicillin	MIC ug.mL-1	-1	50	MBC (uM)	Streptococcus pneumoniae	n.d	PN	Gram	Respiratory	Bacillus sbtilis	MD	N/A	None	None	0	t	0.324	0	0.072	0.074	PND-0.1%-	0.00745884	0.0793328	-0.147	-0.15	0	-0.002
378	AgPNN/AAmoxicillin	2.82865	71.926	-0.799897	0.944204	1	0.310047	CHEMBL1082	Ag	PN	N/A	Amoxicillin	MIC90 ug.mL-1	-1	34.891	MBC (uM)	Streptococcus pneumoniae	n.d	PN	Gram	Respiratory	Bacillus subtilis	ATCC6633	Spherical	None	None	0	t	0.345	0	0.072	0.074	PND-0.1%-	0.00745884	0.0793328	-0.147	-0.135	-0.001	-0.002
379	AgPNN/AAmoxicillin	2.98546	72.0828	-0.643086	0.951913	1	0.344549	CHEMBL1082	Ag	PN	N/A	Amoxicillin	MIC50 ug.mL-1	-1	21.529	MBC (uM)	Streptococcus pneumoniae	n.d	PN	Gram	Respiratory	Bacillus subtilis	ATCC6633	Spherical	None	None	0	v	0.373	0	0.072	0.074	PND-0.1%-	0.00745884	0.0793328	-0.147	-0.135	-0.001	-0.002
380	AgPNN/AAmoxicillin	2.71104	71.8084	-0.917506	0.937675	1	0.285466	CHEMBL1082	Ag	PN	N/A	Amoxicillin	MIC ug.mL-1	-1	50	MBC (uM)	Streptococcus pneumoniae	n.d	PN	Gram	Respiratory	Bacillus subtilis	ATCC6633	Spherical	None	None	0	t	0.324	0	0.072	0.074	PND-0.1%-	0.00745884	0.0793328	-0.147	-0.135	-0.001	-0.002
381	CuOPNN/AAmoxicillin	2.11533	71.2127	-1.51321	0.892384	1	0.180463	CHEMBL1082	CuO	PN	N/A	Amoxicillin	MIC ug.mL-1	-1	50	MBC (uM)	Streptococcus pneumoniae	ERY2	PN	Gram	Respiratory	Bacillus sbtilis	MD	N/A	None	None	0	t	0.324	0	0.072	0.074	PND-0.1%-	0.00745884	0.0793328	-0.147	-0.15	0	0.004
382	CuOPNN/AAmoxicillin	2.0771	71.1744	-1.55145	0.888657	1	0.174878	CHEMBL1082	CuO	PN	N/A	Amoxicillin	MIC90 ug.mL-1	-1	34.891	MBC (uM)	Streptococcus pneumoniae	n.d	PN	Gram	Respiratory	Bacillus sbtilis	MD	N/A	None	None	0	t	0.345	0	0.072	0.074	PND-0.1%-	0.00745884	0.0793328	-0.147	-0.15	0	-0.002
383	CuOPNN/AAmoxicillin	2.0771	71.1744	-1.55145	0.888657	1	0.174878	CHEMBL1082	CuO	PN	N/A	Amoxicillin	MIC90 ug.mL-1	-1	34.891	MBC (uM)	Streptococcus pneumoniae	n.d	PN	Gram	Respiratory	Bacillus sbtilis	MD	N/A	None	None	0	t	0.345	0	0.072	0.074	PND-0.1%-	0.00745884	0.0793328	-0.147	-0.15	0	-0.002
384	CuOPNN/AAmoxicillin	2.23391	71.3312	-1.39463	0.903254	1	0.198669	CHEMBL1082	CuO	PN	N/A	Amoxicillin	MIC50 ug.mL-1	-1	21.529	MBC (uM)	Streptococcus pneumoniae	n.d	PN	Gram	Respiratory	Bacillus sbtilis	MD	N/A	None	None	0	v	0.373	0	0.072	0.074	PND-0.1%-	0.00745884	0.0793328	-0.147	-0.15	0	-0.002
385	CuOPNN/AAmoxicillin	1.95949	71.0568	-1.66905	0.876478	1	0.15855	CHEMBL1082	CuO	PN	N/A	Amoxicillin	MIC ug.mL-1	-1	50	MBC (uM)	Streptococcus pneumoniae	n.d	PN	Gram	Respiratory	Bacillus sbtilis	MD	N/A	None	None	0	t	0.324	0	0.072	0.074	PND-0.1%-	0.00745884	0.0793328	-0.147	-0.15	0	-0.002
386	CuOPNN/AAmoxicillin	0.962617	70.0599	-2.66593	0.723646	1	0.0650141	CHEMBL1082	CuO	PN	N/A	Amoxicillin	Activity %	1	70	MBC (uM)	Streptococcus pneumoniae	n.d	PN	Gram	Respiratory	Escherichia coli	MD	N/A	None	None	0	t	0.146	0	0.072	0.074	PND-0.1%-	0.00745884	0.0793328	-0.147	-0.15	0	-0.002
387	CuOPNN/AAmoxicillin	2.08936	71.1867	-1.53919	0.889865	1	0.176654	CHEMBL1082	CuO	PN	N/A	Amoxicillin	MIC ug.mL-1	-1	50	MBC (uM)	Streptococcus pneumoniae	P-15986	PN	Gram	Respiratory	Escherichia coli	MD	N/A	None	None	0	v	0.324	0	0.072	0.074	PND-0.1%-	0.00745884	0.0793328	-0.147	-0.15	0	0.003
388	CuOPNN/AAmoxicillin	2.08936	71.1867	-1.53919	0.889865	1	0.176654	CHEMBL1082	CuO	PN	N/A	Amoxicillin	MIC ug.mL-1	-1	50	MBC (uM)	Streptococcus pneumoniae	serotype 19A	PN	Gram	Respiratory	Escherichia coli	MD	N/A	None	None	0	t	0.324	0	0.072	0.074	PND-0.1%-	0.00745884	0.0793328	-0.147	-0.15	0	0.003
389	CuOPNN/AAmoxicillin	2.0771	71.1744	-1.55145	0.888657	1	0.174878	CHEMBL1082	CuO	PN	N/A	Amoxicillin	MIC90 ug.mL-1	-1	34.891	MBC (uM)	Streptococcus pneumoniae	serotype 3	PN	Gram	Respiratory	Escherichia coli	MD	N/A	None	None	0	t	0.345	0	0.072	0.074	PND-0.1%-	0.00745884	0.0793328	-0.147	-0.15	0	-0.002
390	CuOPNN/AAmoxicillin	2.0771	71.1744	-1.55145	0.888657	1	0.174878	CHEMBL1082	CuO	PN	N/A	Amoxicillin	MIC90 ug.mL-1	-1	34.891	MBC (uM)	Streptococcus pneumoniae	serotype 6A/C	PN	Gram	Respiratory	Escherichia coli	MD	N/A	None	None	0	t	0.345	0	0.072	0.074	PND-0.1%-	0.00745884	0.0793328	-0.147	-0.15	0	-0.002
391	CuOPNN/AAmoxicillin	2.0771	71.1744	-1.55145	0.888657	1	0.174878	CHEMBL1082	CuO	PN	N/A	Amoxicillin	MIC90 ug.mL-1	-1	34.891	MBC (uM)	Streptococcus pneumoniae	serotype 6C	PN	Gram	Respiratory	Escherichia coli	MD	N/A	None	None	0	v	0.345	0	0.072	0.074	PND-0.1%-	0.00745884	0.0793328	-0.147	-0.15	0	-0.002
392	CuOPNN/AAmoxicillin	1.01456	70.1119	-2.61398	0.733912	1	0.0682441	CHEMBL1082	CuO	PN	N/A	Amoxicillin	Activity %	1	70	MBC (uM)	Streptococcus pneumoniae	serotype 7F	PN	Gram	Respiratory	Escherichia coli	MD	N/A	None	None	0	t	0.146	0	0.072	0.074	PND-0.1%-	0.00745884	0.0793328	-0.147	-0.15	0	0
393	CuIPNN/AAmoxicillin	1.84587	70.9432	-1.78268	0.863641	1	0.143973	CHEMBL1082	CuI	PN	N/A	Amoxicillin	Activity %	1	70	MBC (uM)	Streptococcus pneumoniae	n.d	PN	Gram	Respiratory	Escherichia coli	ATCC10536	N/A	None	None	0	t	0.146	0	0.072	0.074	PND-0.1%-	0.00745884	0.0793328	-0.143	-0.15	-0.001	-0.002
394	CuIPNN/AAmoxicillin	2.84274	71.9401	-0.785805	0.944942	1	0.31307	CHEMBL1082	CuI	PN	N/A	Amoxicillin	MIC ug.mL-1	-1	50	MBC (uM)	Streptococcus pneumoniae	serotype 19F	PN	Gram	Respiratory	Escherichia coli	ATCC10536	N/A	None	None	0	t	0.324	0	0.072	0.074	PND-0.1%-	0.00745884	0.0793328	-0.143	-0.15	-0.001	-0.002
395	CuPNN/AAmoxicillin	0.889436	69.9868	-2.73911	0.708774	1	0.0607047	CHEMBL1082	Cu	PN	N/A	Amoxicillin	MIC ug.mL-1	-1	50	MBC (uM)	Streptococcus pneumoniae	ATCC49619	PN	Gram	Respiratory	Bacillus subtilis	ATCC6633	Spherical	None	None	0	t	0.324	0	0.072	0.074	PND-0.1%-	0.00745884	0.0793328	-0.147	-0.15	-0.001	0.004
396	CuPNN/AAmoxicillin	0.811516	69.9088	-2.81703	0.692432	1	0.0564109	CHEMBL1082	Cu	PN	N/A	Amoxicillin	MIC ug.mL-1	-1	50	MBC (uM)	Streptococcus pneumoniae	isolate 753	PN	Gram	Respiratory	Bacillus subtilis	ATCC6633	Spherical	None	None	0	v	0.324	0	0.072	0.074	PND-0.1%-	0.00745884	0.0793328	-0.147	-0.15	-0.001	0.001
397	CuPNN/AAmoxicillin	0.851204	69.9485	-2.77734	0.70082	1	0.058561	CHEMBL1082	Cu	PN	N/A	Amoxicillin	MIC90 ug.mL-1	-1	34.891	MBC (uM)	Streptococcus pneumoniae	n.d	PN	Gram	Respiratory	Bacillus subtilis	ATCC6633	Spherical	None	None	0	t	0.345	0	0.072	0.074	PND-0.1%-	0.00745884	0.0793328	-0.147	-0.15	-0.001	-0.002
398	CuPNN/AAmoxicillin	1.00802	70.1053	-2.62053	0.732632	1	0.0678288	CHEMBL1082	Cu	PN	N/A	Amoxicillin	MIC50 ug.mL-1	-1	21.529	MBC (uM)	Streptococcus pneumoniae	n.d	PN	Gram	Respiratory	Bacillus subtilis	ATCC6633	Spherical	None	None	0	t	0.373	0	0.072	0.074	PND-0.1%-	0.00745884	0.0793328	-0.147	-0.15	-0.001	-0.002
399	CuPNN/AAmoxicillin	0.733595	69.8309	-2.89495	0.675594	1	0.0524038	CHEMBL1082	Cu	PN	N/A	Amoxicillin	MIC ug.mL-1	-1	50	MBC (uM)	Streptococcus pneumoniae	n.d	PN	Gram	Respiratory	Bacillus subtilis	ATCC6633	Spherical	None	None	0	t	0.324	0	0.072	0.074	PND-0.1%-	0.00745884	0.0793328	-0.147	-0.15	-0.001	-0.002
400	CuOPNN/AAmoxicillin	0.962617	70.0599	-2.66593	0.723646	1	0.0650141	CHEMBL1082	CuO	PN	N/A	Amoxicillin	Activity %	1	70	MBC (uM)	Streptococcus pneumoniae	n.d	PN	Gram	Respiratory	Escherichia coli	MD	N/A	None	None	0	t	0.146	0	0.072	0.074	PND-0.1%-	0.00745884	0.0793328	-0.147	-0.15	0	-0.002
401	CuOPNN/AAmoxicillin	1.72533	70.8227	-1.90321	0.848814	1	0.129745	CHEMBL1082	CuO	PN	N/A	Amoxicillin	log10CFU/ml -	-1	1.979	MBC (uM)	Streptococcus pneumoniae	P-15986	PN	Gram	Respiratory	Escherichia coli	MD	N/A	None	None	0	v	0.259	0	0.072	0.074	PND-0.1%-	0.00745884	0.0793328	-0.147	-0.15	0	0.003
402	CuOPNN/AAmoxicillin	2.0771	71.1744	-1.55145	0.888657	1	0.174878	CHEMBL1082	CuO	PN	N/A	Amoxicillin	MIC90 ug.mL-1	-1	34.891	MBC (uM)	Streptococcus pneumoniae	serotype 3	PN	Gram	Respiratory	Escherichia coli	MD	N/A	None	None	0	t	0.345	0	0.072	0.074	PND-0.1%-	0.00745884	0.0793328	-0.147	-0.15	0	-0.002
403	CuOPNN/AAmoxicillin	1.98546	71.0828	-1.64308	0.879262	1	0.162046	CHEMBL1082	CuO	PN	N/A	Amoxicillin	MIC ug.mL-1	-1	50	MBC (uM)	Streptococcus pneumoniae	ATCC6301	PN	Gram	Respiratory	Bacillus sbtilis	MD	N/A	None	None	0	t	0.324	0	0.072	0.074	PND-0.1%-	0.00745884	0.0793328	-0.147	-0.15	0	-0.001
404	CuOPNN/AAmoxicillin	2.03741	71.1347	-1.59113	0.884669	1	0.169224	CHEMBL1082	CuO	PN	N/A	Amoxicillin	MIC ug.mL-1	-1	50	MBC (uM)	Streptococcus pneumoniae	ATCC6303	PN	Gram	Respiratory	Bacillus sbtilis	MD	N/A	None	None	0	t	0.324	0	0.072	0.074	PND-0.1%-	0.00745884	0.0793328	-0.147	-0.15	0	0.001
405	CuOPNN/AAmoxicillin	2.11533	71.2127	-1.51321	0.892384	1	0.180463	CHEMBL1082	CuO	PN	N/A	Amoxicillin	MIC ug.mL-1	-1	50	MBC (uM)	Streptococcus pneumoniae	ERY2	PN	Gram	Respiratory	Bacillus sbtilis	MD	N/A	None	None	0	v	0.324	0	0.072	0.074	PND-0.1%-	0.00745884	0.0793328	-0.147	-0.15	0	0.004
406	CuOPNN/AAmoxicillin	2.0771	71.1744	-1.55145	0.888657	1	0.174878	CHEMBL1082	CuO	PN	N/A	Amoxicillin	MIC90 ug.mL-1	-1	34.891	MBC (uM)	Streptococcus pneumoniae	n.d	PN	Gram	Respiratory	Bacillus sbtilis	MD	N/A	None	None	0	v	0.345	0	0.072	0.074	PND-0.1%-	0.00745884	0.0793328	-0.147	-0.15	0	-0.002
407	CuOPNN/AAmoxicillin	2.23391	71.3312	-1.39463	0.903254	1	0.198669	CHEMBL1082	CuO	PN	N/A	Amoxicillin	MIC50 ug.mL-1	-1	21.529	MBC (uM)	Streptococcus pneumoniae	n.d	PN	Gram	Respiratory	Bacillus sbtilis	MD	N/A	None	None	0	t	0.373	0	0.072	0.074	PND-0.1%-	0.00745884	0.0793328	-0.147	-0.15	0	-0.002
408	CuOPNN/AAmoxicillin	1.95949	71.0568	-1.66905	0.876478	1	0.15855	CHEMBL1082	CuO	PN	N/A	Amoxicillin	MIC ug.mL-1	-1	50	MBC (uM)	Streptococcus pneumoniae	n.d	PN	Gram	Respiratory	Bacillus sbtilis	MD	N/A	None	None	0	t	0.324	0	0.072	0.074	PND-0.1%-	0.00745884	0.0793328	-0.147	-0.15	0	-0.002
409	CuIPNN/AAmoxicillin	2.92066	72.018	-0.707885	0.948858	1	0.330066	CHEMBL1082	CuI	PN	N/A	Amoxicillin	MIC ug.mL-1	-1	50	MBC (uM)	Streptococcus pneumoniae	isolate 753	PN	Gram	Respiratory	Bacillus subtilis	ATCC6633	N/A	None	None	0	t	0.324	0	0.072	0.074	PND-0.1%-	0.00745884	0.0793328	-0.143	-0.15	-0.001	0.001
410	CuIPNN/AAmoxicillin	2.96035	72.0577	-0.668197	0.95075	1	0.338901	CHEMBL1082	CuI	PN	N/A	Amoxicillin	MIC90 ug.mL-1	-1	34.891	MBC (uM)	Streptococcus pneumoniae	n.d	PN	Gram	Respiratory	Bacillus subtilis	ATCC6633	N/A	None	None	0	v	0.345	0	0.072	0.074	PND-0.1%-	0.00745884	0.0793328	-0.143	-0.15	-0.001	-0.002
411	CuIPNN/AAmoxicillin	3.11716	72.2145	-0.511385	0.957595	1	0.374869	CHEMBL1082	CuI	PN	N/A	Amoxicillin	MIC50 ug.mL-1	-1	21.529	MBC (uM)	Streptococcus pneumoniae	n.d	PN	Gram	Respiratory	Bacillus subtilis	ATCC6633	N/A	None	None	0	t	0.373	0	0.072	0.074	PND-0.1%-	0.00745884	0.0793328	-0.143	-0.15	-0.001	-0.002
412	CuIPNN/AAmoxicillin	3.11716	72.2145	-0.511385	0.957595	1	0.374869	CHEMBL1082	CuI	PN	N/A	Amoxicillin	MIC50 ug.mL-1	-1	21.529	MBC (uM)	Streptococcus pneumoniae	n.d	PN	Gram	Respiratory	Bacillus subtilis	ATCC6633	N/A	None	None	0	t	0.373	0	0.072	0.074	PND-0.1%-	0.00745884	0.0793328	-0.143	-0.15	-0.001	-0.002
413	CuIPNN/AAmoxicillin	2.84274	71.9401	-0.785805	0.944942	1	0.31307	CHEMBL1082	CuI	PN	N/A	Amoxicillin	MIC ug.mL-1	-1	50	MBC (uM)	Streptococcus pneumoniae	n.d	PN	Gram	Respiratory	Bacillus subtilis	ATCC6633	N/A	None	None	0	v	0.324	0	0.072	0.074	PND-0.1%-	0.00745884	0.0793328	-0.143	-0.15	-0.001	-0.002
414	CuIPNN/AAmoxicillin	2.84274	71.9401	-0.785805	0.944942	1	0.31307	CHEMBL1082	CuI	PN	N/A	Amoxicillin	MIC ug.mL-1	-1	50	MBC (uM)	Streptococcus pneumoniae	n.d	PN	Gram	Respiratory	Bacillus subtilis	ATCC6633	N/A	None	None	0	t	0.324	0	0.072	0.074	PND-0.1%-	0.00745884	0.0793328	-0.143	-0.15	-0.001	-0.002
415	CuOPNN/AAmoxicillin	2.0771	71.1744	-1.55145	0.888657	1	0.174878	CHEMBL1082	CuO	PN	N/A	Amoxicillin	MIC90 ug.mL-1	-1	34.891	MBC (uM)	Streptococcus pneumoniae	n.d	PN	Gram	Respiratory	Bacillus sbtilis	MD	N/A	None	None	0	t	0.345	0	0.072	0.074	PND-0.1%-	0.00745884	0.0793328	-0.147	-0.15	0	-0.002
416	CuOPNN/AAmoxicillin	2.23391	71.3312	-1.39463	0.903254	1	0.198669	CHEMBL1082	CuO	PN	N/A	Amoxicillin	MIC50 ug.mL-1	-1	21.529	MBC (uM)	Streptococcus pneumoniae	n.d	PN	Gram	Respiratory	Bacillus sbtilis	MD	N/A	None	None	0	t	0.373	0	0.072	0.074	PND-0.1%-	0.00745884	0.0793328	-0.147	-0.15	0	-0.002
417	CuOPNN/AAmoxicillin	1.95949	71.0568	-1.66905	0.876478	1	0.15855	CHEMBL1082	CuO	PN	N/A	Amoxicillin	MIC ug.mL-1	-1	50	MBC (uM)	Streptococcus pneumoniae	n.d	PN	Gram	Respiratory	Bacillus sbtilis	MD	N/A	None	None	0	t	0.324	0	0.072	0.074	PND-0.1%-	0.00745884	0.0793328	-0.147	-0.15	0	-0.002
418	CuOPNN/AAmoxicillin	0.962617	70.0599	-2.66593	0.723646	1	0.0650141	CHEMBL1082	CuO	PN	N/A	Amoxicillin	Activity %	1	70	MBC (uM)	Streptococcus pneumoniae	n.d	PN	Gram	Respiratory	Escherichia coli	MD	N/A	None	None	0	v	0.146	0	0.072	0.074	PND-0.1%-	0.00745884	0.0793328	-0.147	-0.15	0	-0.002
419	CuOPNN/AAmoxicillin	1.72533	70.8227	-1.90321	0.848814	1	0.129745	CHEMBL1082	CuO	PN	N/A	Amoxicillin	log10CFU/ml -	-1	1.979	MBC (uM)	Streptococcus pneumoniae	P-15986	PN	Gram	Respiratory	Escherichia coli	MD	N/A	None	None	0	t	0.259	0	0.072	0.074	PND-0.1%-	0.00745884	0.0793328	-0.147	-0.15	0	0.003
420	CuOPNN/AAmoxicillin	2.0771	71.1744	-1.55145	0.888657	1	0.174878	CHEMBL1082	CuO	PN	N/A	Amoxicillin	MIC90 ug.mL-1	-1	34.891	MBC (uM)	Streptococcus pneumoniae	serotype 3	PN	Gram	Respiratory	Escherichia coli	MD	N/A	None	None	0	t	0.345	0	0.072	0.074	PND-0.1%-	0.00745884	0.0793328	-0.147	-0.15	0	-0.002
421	CuOPNN/AAmoxicillin	2.0771	71.1744	-1.55145	0.888657	1	0.174878	CHEMBL1082	CuO	PN	N/A	Amoxicillin	MIC90 ug.mL-1	-1	34.891	MBC (uM)	Streptococcus pneumoniae	n.d	PN	Gram	Respiratory	Bacillus sbtilis	MD	N/A	None	None	0	t	0.345	0	0.072	0.074	PND-0.1%-	0.00745884	0.0793328	-0.147	-0.15	0	-0.002
422	CuOPNN/AAmoxicillin	2.0771	71.1744	-1.55145	0.888657	1	0.174878	CHEMBL1082	CuO	PN	N/A	Amoxicillin	MIC90 ug.mL-1	-1	34.891	MBC (uM)	Streptococcus pneumoniae	n.d	PN	Gram	Respiratory	Bacillus sbtilis	MD	N/A	None	None	0	t	0.345	0	0.072	0.074	PND-0.1%-	0.00745884	0.0793328	-0.147	-0.15	0	-0.002
423	CuOPNN/AAmoxicillin	2.23391	71.3312	-1.39463	0.903254	1	0.198669	CHEMBL1082	CuO	PN	N/A	Amoxicillin	MIC50 ug.mL-1	-1	21.529	MBC (uM)	Streptococcus pneumoniae	n.d	PN	Gram	Respiratory	Bacillus sbtilis	MD	N/A	None	None	0	v	0.373	0	0.072	0.074	PND-0.1%-	0.00745884	0.0793328	-0.147	-0.15	0	-0.002
424	AgPNN/AAmoxicillin	2.42493	71.5223	-1.20361	0.918709	1	0.230833	CHEMBL1082	Ag	PN	N/A	Amoxicillin	log10CFU/ml -	-1	1.979	MBC (uM)	Streptococcus pneumoniae	P-52181	PN	Gram	Respiratory	Escherichia coli	K-12	Spherical	None	None	0	t	0.259	0	0.072	0.074	PND-0.1%-	0.00745884	0.0793328	-0.147	-0.135	-0.001	0.001
425	AgPNN/AAmoxicillin	3.35593	72.4533	-0.272611	0.966299	1	0.432266	CHEMBL1082	Ag	PN	N/A	Amoxicillin	MIC90 ug.mL-1	-1	34.891	MBC (uM)	Streptococcus pneumoniae	serotype 15A	PN	Gram	Respiratory	Escherichia coli	ATCC8739	Spherical	None	None	0	v	0.345	0	0.072	0.074	PND-0.1%-	0.00745884	0.0793328	-0.146	-0.135	-0.001	-0.002
426	AgPNN/AAmoxicillin	1.71417	70.8115	-1.91438	0.847376	1	0.12849	CHEMBL1082	Ag	PN	N/A	Amoxicillin	Activity %	1	70	MBC (uM)	Streptococcus pneumoniae	n.d	PN	Gram	Respiratory	Escherichia coli	ATCC10536	Spherical	None	None	0	t	0.146	0	0.072	0.074	PND-0.1%-	0.00745884	0.0793328	-0.147	-0.135	-0.001	-0.002
427	AgPNN/AAmoxicillin	2.88059	71.9779	-0.74795	0.946879	1	0.321268	CHEMBL1082	Ag	PN	N/A	Amoxicillin	MIC90 ug.mL-1	-1	34.891	MBC (uM)	Streptococcus pneumoniae	serotype 35B	PN	Gram	Respiratory	Escherichia coli	ATCC10536	Spherical	None	None	0	t	0.345	0	0.072	0.074	PND-0.1%-	0.00745884	0.0793328	-0.147	-0.135	-0.001	0
428	CuPNN/AAmoxicillin	0.962617	70.0599	-2.66593	0.723646	1	0.0650141	CHEMBL1082	Cu	PN	N/A	Amoxicillin	Activity %	1	70	MBC (uM)	Streptococcus pneumoniae	serotype 19F	PN	Gram	Respiratory	Escherichia coli	ATCC25922	Spherical	None	None	0	v	0.146	0	0.072	0.074	PND-0.1%-	0.00745884	0.0793328	-0.147	-0.15	0	-0.002
429	CuPNN/AAmoxicillin	0.974775	70.0721	-2.65377	0.72607	1	0.0657571	CHEMBL1082	Cu	PN	N/A	Amoxicillin	log10CFU/ml -	-1	1.979	MBC (uM)	Streptococcus pneumoniae	P-52181	PN	Gram	Respiratory	Escherichia coli	K-12	Spherical	None	None	0	t	0.259	0	0.072	0.074	PND-0.1%-	0.00745884	0.0793328	-0.146	-0.15	-0.001	0.001
430	CuPNN/AAmoxicillin	0.190718	69.288	-3.43783	0.547535	1	0.031134	CHEMBL1082	Cu	PN	N/A	Amoxicillin	Activity log10CFU/ml	1	3.425	MBC (uM)	Streptococcus pneumoniae	WT3	PN	Gram	Respiratory	Escherichia coli	K-12	Spherical	None	None	0	t	0.119	0	0.072	0.074	PND-0.1%-	0.00745884	0.0793328	-0.146	-0.15	-0.001	0.001
431	CuPNN/AAmoxicillin	-0.263278	68.8341	-3.89182	0.434558	1	0.02	CHEMBL1082	Cu	PN	N/A	Amoxicillin	Activity %	1	70	MBC (uM)	Streptococcus pneumoniae	n.d	PN	Gram	Respiratory	Escherichia coli	ATCC10536	Spherical	None	None	0	t	0.146	0	0.072	0.074	PND-0.1%-	0.00745884	0.0793328	-0.147	-0.15	-0.001	-0.002
432	CuPNN/AAmoxicillin	0.981071	70.0784	-2.64747	0.727321	1	0.0661449	CHEMBL1082	Cu	PN	N/A	Amoxicillin	MIC90 ug.mL-1	-1	34.891	MBC (uM)	Streptococcus pneumoniae	serotype 19A	PN	Gram	Respiratory	Escherichia coli	ATCC10536	Spherical	None	None	0	v	0.345	0	0.072	0.074	PND-0.1%-	0.00745884	0.0793328	-0.147	-0.15	-0.001	0.003
433	CuPNN/AAmoxicillin	0.903151	70.0005	-2.72539	0.711597	1	0.0614915	CHEMBL1082	Cu	PN	N/A	Amoxicillin	MIC90 ug.mL-1	-1	34.891	MBC (uM)	Streptococcus pneumoniae	serotype 35B	PN	Gram	Respiratory	Escherichia coli	ATCC10536	Spherical	None	None	0	t	0.345	0	0.072	0.074	PND-0.1%-	0.00745884	0.0793328	-0.147	-0.15	-0.001	0
434	CuPNN/AAmoxicillin	1.37849	70.4758	-2.25005	0.798748	1	0.0953448	CHEMBL1082	Cu	PN	N/A	Amoxicillin	MIC90 ug.mL-1	-1	34.891	MBC (uM)	Streptococcus pneumoniae	serotype 15A	PN	Gram	Respiratory	Escherichia coli	ATCC8739	Spherical	None	None	0	t	0.345	0	0.072	0.074	PND-0.1%-	0.00745884	0.0793328	-0.146	-0.15	-0.001	-0.002
435	AgPNGlutathioneAmoxicillin	2.46256	71.5599	-1.16599	0.921475	1	0.237581	CHEMBL1082	Ag	PN	Glutathione	Amoxicillin	MIC90 ug.mL-1	-1	34.891	Microb-Eff	Streptococcus pneumoniae	serotype 19A	PN	Gram	Respiratory	Escherichia coli	ATCC10536	Spherical	Single	Monomer	0	t	0.386	0	0.072	0.074	PND-0.1%-	0.00745884	0.0793328	-0.147	-0.15	0	0.004
436	AgPNGlutathioneAmoxicillin	2.35866	71.456	-1.26988	0.91362	1	0.219278	CHEMBL1082	Ag	PN	Glutathione	Amoxicillin	MIC90 ug.mL-1	-1	34.891	Microb-Eff	Streptococcus pneumoniae	serotype 35B	PN	Gram	Respiratory	Escherichia coli	ATCC10536	Spherical	Single	Monomer	0	v	0.386	0	0.072	0.074	PND-0.1%-	0.00745884	0.0793328	-0.147	-0.15	0	0
437	AgPNGlutathioneAmoxicillin	1.23666	70.334	-2.39188	0.774982	1	0.0837938	CHEMBL1082	Ag	PN	Glutathione	Amoxicillin	MIC90 ug.mL-1	-1	34.891	Microb-Eff	Streptococcus pneumoniae	serotype 19A	PN	Gram	Respiratory	Escherichia coli	ATCC10536	Spherical	Single	Monomer	0	t	0.386	0	0.072	0.074	PND-0.1%-	0.00745884	0.0793328	-0.147	-0.15	-0.001	0.004
438	AgPNGlutathioneAmoxicillin	1.13277	70.2301	-2.49578	0.756349	1	0.0761548	CHEMBL1082	Ag	PN	Glutathione	Amoxicillin	MIC90 ug.mL-1	-1	34.891	Microb-Eff	Streptococcus pneumoniae	serotype 35B	PN	Gram	Respiratory	Escherichia coli	ATCC10536	Spherical	Single	Monomer	0	t	0.386	0	0.072	0.074	PND-0.1%-	0.00745884	0.0793328	-0.147	-0.15	-0.001	0
439	AuPNPDT/DMBAmoxicillin	7.64631	76.7436	4.01776	0.999522	1	0.982325	CHEMBL1082	Au	PN	PDT/DMB	Amoxicillin	MIC90 ug.mL-1	-1	34.891	MIC (uM)	Streptococcus pneumoniae	serotype 23A	PN	Gram	Respiratory	Escherichia coli	ATCC11775	Spherical	Double	Monomer	0	t	0.452	0	0.072	0.074	PND-0.1%-	0.00745884	0.0793328	-0.143	-0.119	-0.001	-0.002
440	AuPNPDT/DMBAmoxicillin	7.4895	76.5868	3.86095	0.999441	1	0.979386	CHEMBL1082	Au	PN	PDT/DMB	Amoxicillin	MIC ug.mL-1	-1	50	MIC (uM)	Streptococcus pneumoniae	serotype 6C	PN	Gram	Respiratory	Escherichia coli	ATCC11775	Spherical	Double	Monomer	0	v	0.424	0	0.072	0.074	PND-0.1%-	0.00745884	0.0793328	-0.143	-0.119	-0.001	-0.002
441	AuPNPDT/MelAmoxicillin	11.0739	80.1712	7.44533	0.999984	1	0.999416	CHEMBL1082	Au	PN	PDT/Mel	Amoxicillin	MIC90 ug.mL-1	-1	34.891	MIC (uM)	Streptococcus pneumoniae	serotype 23A	PN	Gram	Respiratory	Escherichia coli	ATCC11775	Spherical	Double	Monomer	0	t	0.452	0	0.072	0.074	PND-0.1%-	0.00745884	0.0793328	-0.143	-0.093	-0.001	-0.002
442	AuPNPDT/MelAmoxicillin	9.61217	78.7095	5.98362	0.999933	1	0.997487	CHEMBL1082	Au	PN	PDT/Mel	Amoxicillin	Activity %	1	70	MIC (uM)	Streptococcus pneumoniae	n.d	PN	Gram	Respiratory	Escherichia coli	MDR	Spherical	Double	Monomer	0	t	0.191	0	0.072	0.074	PND-0.1%-	0.00745884	0.0793328	-0.143	-0.093	-0.001	-0.002
443	AuPNPDT/MelAmoxicillin	11.0469	80.1443	7.41839	0.999984	1	0.9994	CHEMBL1082	Au	PN	PDT/Mel	Amoxicillin	MIC ug.mL-1	-1	50	MIC (uM)	Streptococcus pneumoniae	P-12698	PN	Gram	Respiratory	Escherichia coli	MDR	Spherical	Double	Monomer	0	t	0.424	0	0.072	0.074	PND-0.1%-	0.00745884	0.0793328	-0.143	-0.093	-0.001	0.003
444	AuPNPDT/MelAmoxicillin	9.61217	78.7095	5.98362	0.999933	1	0.997487	CHEMBL1082	Au	PN	PDT/Mel	Amoxicillin	Activity %	1	70	MIC (uM)	Streptococcus pneumoniae	serotype 15A	PN	Gram	Respiratory	Escherichia coli	MDR	Spherical	Double	Monomer	0	v	0.191	0	0.072	0.074	PND-0.1%-	0.00745884	0.0793328	-0.143	-0.093	-0.001	-0.002
445	AuPNPDT/MelAmoxicillin	11.2037	80.3011	7.5752	0.999986	1	0.999487	CHEMBL1082	Au	PN	PDT/Mel	Amoxicillin	MIC90 ug.mL-1	-1	34.891	MIC (uM)	Streptococcus pneumoniae	serotype 22	PN	Gram	Respiratory	Escherichia coli	MDR	Spherical	Double	Monomer	0	t	0.452	0	0.072	0.074	PND-0.1%-	0.00745884	0.0793328	-0.143	-0.093	-0.001	0.003
446	AuPNPDT/AChAmoxicillin	8.9646	78.0619	5.33606	0.999872	1	0.995208	CHEMBL1082	Au	PN	PDT/ACh	Amoxicillin	MIC90 ug.mL-1	-1	34.891	MIC (uM)	Streptococcus pneumoniae	serotype 23A	PN	Gram	Respiratory	Escherichia coli	ATCC11775	Spherical	Double	Monomer	0	t	0.452	0	0.072	0.074	PND-0.1%-	0.00745884	0.0793328	-0.143	-0.109	-0.001	-0.002
447	AuPNPDT/AChAmoxicillin	7.5029	76.6002	3.87435	0.999449	1	0.979655	CHEMBL1082	Au	PN	PDT/ACh	Amoxicillin	Activity %	1	70	MIC (uM)	Streptococcus pneumoniae	n.d	PN	Gram	Respiratory	Escherichia coli	MDR	Spherical	Double	Monomer	0	t	0.191	0	0.072	0.074	PND-0.1%-	0.00745884	0.0793328	-0.143	-0.109	-0.001	-0.002
448	AuPNPDT/AChAmoxicillin	8.46162	77.559	4.83308	0.999789	1	0.992101	CHEMBL1082	Au	PN	PDT/ACh	Amoxicillin	log10CFU/ml -	-1	1.979	MIC (uM)	Streptococcus pneumoniae	P-12698	PN	Gram	Respiratory	Escherichia coli	MDR	Spherical	Double	Monomer	0	v	0.339	0	0.072	0.074	PND-0.1%-	0.00745884	0.0793328	-0.143	-0.109	-0.001	0.003
449	AuPNPDT/AChAmoxicillin	9.09447	78.1918	5.46593	0.999888	1	0.995789	CHEMBL1082	Au	PN	PDT/ACh	Amoxicillin	MIC90 ug.mL-1	-1	34.891	MIC (uM)	Streptococcus pneumoniae	serotype 22	PN	Gram	Respiratory	Escherichia coli	MDR	Spherical	Double	Monomer	0	t	0.452	0	0.072	0.074	PND-0.1%-	0.00745884	0.0793328	-0.143	-0.109	-0.001	0.003
450	AuPNPDT/CQAmoxicillin	7.89838	76.9957	4.26984	0.999629	1	0.986209	CHEMBL1082	Au	PN	PDT/CQ	Amoxicillin	Activity %	1	70	MIC (uM)	Streptococcus pneumoniae	n.d	PN	Gram	Respiratory	Escherichia coli	MDR	Spherical	Double	Monomer	0	t	0.191	0	0.072	0.074	PND-0.1%-	0.00745884	0.0793328	-0.143	-0.106	-0.001	-0.002
451	AuPNPDT/CQAmoxicillin	8.85711	77.9544	5.22857	0.999858	1	0.994667	CHEMBL1082	Au	PN	PDT/CQ	Amoxicillin	log10CFU/ml -	-1	1.979	MIC (uM)	Streptococcus pneumoniae	P-12698	PN	Gram	Respiratory	Escherichia coli	MDR	Spherical	Double	Monomer	0	t	0.339	0	0.072	0.074	PND-0.1%-	0.00745884	0.0793328	-0.143	-0.106	-0.001	0.003
452	AuPNPDT/CQAmoxicillin	9.48996	78.5873	5.86141	0.999924	1	0.997161	CHEMBL1082	Au	PN	PDT/CQ	Amoxicillin	MIC90 ug.mL-1	-1	34.891	MIC (uM)	Streptococcus pneumoniae	serotype 22	PN	Gram	Respiratory	Escherichia coli	MDR	Spherical	Double	Monomer	0	v	0.452	0	0.072	0.074	PND-0.1%-	0.00745884	0.0793328	-0.143	-0.106	-0.001	0.003
453	AuPNPDT/DMBAmoxicillin	7.14333	76.2407	3.51478	0.999211	1	0.971106	CHEMBL1082	Au	PN	PDT/DMB	Amoxicillin	log10CFU/ml -	-1	1.979	MIC (uM)	Streptococcus pneumoniae	P-12698	PN	Gram	Respiratory	Escherichia coli	MDR	Spherical	Double	Monomer	0	t	0.339	0	0.072	0.074	PND-0.1%-	0.00745884	0.0793328	-0.143	-0.119	-0.001	0.003
454	AuPNPDT/GAmoxicillin	9.38443	78.4818	5.75589	0.999916	1	0.996846	CHEMBL1082	Au	PN	PDT/G	Amoxicillin	log10CFU/ml -	-1	1.979	MIC (uM)	Streptococcus pneumoniae	P-12698	PN	Gram	Respiratory	Escherichia coli	MDR	Spherical	Double	Monomer	0	v	0.339	0	0.072	0.074	PND-0.1%-	0.00745884	0.0793328	-0.143	-0.102	-0.001	0.003
455	AuPNPDTAmoxicillin	5.16589	74.2632	1.53734	0.994324	1	0.823078	CHEMBL1082	Au	PN	PDT	Amoxicillin	log10CFU/ml -	-1	1.979	MIC (uM)	Streptococcus pneumoniae	P-12698	PN	Gram	Respiratory	Escherichia coli	MDR	Spherical	Single	Monomer	0	t	0.339	0	0.072	0.074	PND-0.1%-	0.00745884	0.0793328	-0.143	-0.134	-0.001	0.003
456	AuPNPDT/CPBAmoxicillin	8.46162	77.559	4.83308	0.999789	1	0.992101	CHEMBL1082	Au	PN	PDT/CPB	Amoxicillin	log10CFU/ml -	-1	1.979	MIC (uM)	Streptococcus pneumoniae	P-12698	PN	Gram	Respiratory	Escherichia coli	MDR	Spherical	Double	Monomer	0	v	0.339	0	0.072	0.074	PND-0.1%-	0.00745884	0.0793328	-0.143	-0.109	-0.001	0.003
457	AuPNPDT/CPBAmoxicillin	9.16622	78.2635	5.53767	0.999895	1	0.99608	CHEMBL1082	Au	PN	PDT/CPB	Amoxicillin	MIC50 ug.mL-1	-1	21.529	MIC (uM)	Streptococcus pneumoniae	serotype 19F	PN	Gram	Respiratory	Escherichia coli	MDR	Spherical	Double	Monomer	0	t	0.488	0	0.072	0.074	PND-0.1%-	0.00745884	0.0793328	-0.143	-0.109	-0.001	-0.002
458	AgPNMaltoseAmoxicillin	1.21464	70.312	-2.41391	0.771118	1	0.0821182	CHEMBL1082	Ag	PN	Maltose	Amoxicillin	Activity %	1	70	MIC (uM)	Streptococcus pneumoniae	serotype 19F	PN	Gram	Respiratory	Escherichia coli	ATCC25922	Spherical	Single	Monomer	0	t	0.191	0	0.072	0.074	PND-0.1%-	0.00745884	0.0793328	-0.147	-0.15	0	-0.002
459	AgPNGlutathioneAmoxicillin	1.60629	70.7036	-2.02226	0.832895	1	0.116886	CHEMBL1082	Ag	PN	Glutathione	Amoxicillin	MIC90 ug.mL-1	-1	34.891	MIC (uM)	Streptococcus pneumoniae	serotype 19A	PN	Gram	Respiratory	Escherichia coli	ATCC10536	Spherical	Single	Monomer	0	t	0.452	0	0.072	0.074	PND-0.1%-	0.00745884	0.0793328	-0.147	-0.15	-0.001	0.004
460	AgPNGlutathioneAmoxicillin	-0.0112593	69.0861	-3.6398	0.497185	1	0.0255857	CHEMBL1082	Ag	PN	Glutathione	Amoxicillin	Activity %	1	70	MIC (uM)	Streptococcus pneumoniae	serotype 22F	PN	Gram	Respiratory	Escherichia coli	ATCC10536	Spherical	Single	Monomer	0	v	0.191	0	0.072	0.074	PND-0.1%-	0.00745884	0.0793328	-0.147	-0.15	-0.001	-0.002
461	AgPNGlutathioneAmoxicillin	1.65206	70.7494	-1.97648	0.83917	1	0.121694	CHEMBL1082	Ag	PN	Glutathione	Amoxicillin	MIC50 ug.mL-1	-1	21.529	MIC (uM)	Streptococcus pneumoniae	serotype 6C	PN	Gram	Respiratory	Escherichia coli	ATCC10536	Spherical	Single	Monomer	0	t	0.488	0	0.072	0.074	PND-0.1%-	0.00745884	0.0793328	-0.147	-0.15	-0.001	-0.002
462	AgPNLactoseAmoxicillin	2.67634	71.7737	-0.952202	0.935616	1	0.278442	CHEMBL1082	Ag	PN	Lactose	Amoxicillin	MIC90 ug.mL-1	-1	34.891	MIC (uM)	Streptococcus pneumoniae	serotype 19F	PN	Gram	Respiratory	Escherichia coli	ATCC25922	Spherical	Single	Monomer	0	t	0.452	0	0.072	0.074	PND-0.1%-	0.00745884	0.0793328	-0.147	-0.15	0	-0.002
463	AgPNLactoseAmoxicillin	2.9299	72.0272	-0.69864	0.949305	1	0.332114	CHEMBL1082	Ag	PN	Lactose	Amoxicillin	MIC50 ug.mL-1	-1	21.529	MIC (uM)	Streptococcus pneumoniae	serotype 35B	PN	Gram	Respiratory	Escherichia coli	ATCC25922	Spherical	Single	Monomer	0	t	0.488	0	0.072	0.074	PND-0.1%-	0.00745884	0.0793328	-0.147	-0.15	0	0
464	AgPNGlucoseAmoxicillin	2.57148	71.6688	-1.05707	0.929003	1	0.257871	CHEMBL1082	Ag	PN	Glucose	Amoxicillin	MIC ug.mL-1	-1	50	MIC (uM)	Streptococcus pneumoniae	N1387	PN	Gram	Respiratory	Escherichia coli	ATCC25922	Spherical	Single	Monomer	0	v	0.424	0	0.072	0.074	PND-0.1%-	0.00745884	0.0793328	-0.147	-0.15	0	0
465	AgPNGlucoseAmoxicillin	2.67634	71.7737	-0.952202	0.935616	1	0.278442	CHEMBL1082	Ag	PN	Glucose	Amoxicillin	MIC90 ug.mL-1	-1	34.891	MIC (uM)	Streptococcus pneumoniae	serotype 19F	PN	Gram	Respiratory	Escherichia coli	ATCC25922	Spherical	Single	Monomer	0	t	0.452	0	0.072	0.074	PND-0.1%-	0.00745884	0.0793328	-0.147	-0.15	0	-0.002
466	CuOPNN/AAmoxicillin	1.21464	70.312	-2.41391	0.771118	1	0.0821182	CHEMBL1082	CuO	PN	N/A	Amoxicillin	Activity %	1	70	MIC (uM)	Streptococcus pneumoniae	n.d	PN	Gram	Respiratory	Escherichia coli	MD	N/A	None	None	0	t	0.191	0	0.072	0.074	PND-0.1%-	0.00745884	0.0793328	-0.147	-0.15	0	-0.002
467	CuOPNN/AAmoxicillin	2.17336	71.2707	-1.45518	0.897832	1	0.189206	CHEMBL1082	CuO	PN	N/A	Amoxicillin	log10CFU/ml -	-1	1.979	MIC (uM)	Streptococcus pneumoniae	P-15986	PN	Gram	Respiratory	Escherichia coli	MD	N/A	None	None	0	t	0.339	0	0.072	0.074	PND-0.1%-	0.00745884	0.0793328	-0.147	-0.15	0	0.003
468	CuPNN/AAmoxicillin	1.8079	70.9052	-1.82064	0.859108	1	0.139357	CHEMBL1082	Cu	PN	N/A	Amoxicillin	MIC50 ug.mL-1	-1	21.529	MIC (uM)	Streptococcus pneumoniae	ATCC49619	PN	Gram	Respiratory	Bacillus subtilis	ATCC6633	Spherical	None	None	0	t	0.488	0	0.072	0.074	PND-0.1%-	0.00745884	0.0793328	-0.147	-0.15	-0.001	0.004
469	CuPNN/AAmoxicillin	1.45045	70.5478	-2.1781	0.810067	1	0.101735	CHEMBL1082	Cu	PN	N/A	Amoxicillin	MIC90 ug.mL-1	-1	34.891	MIC (uM)	Streptococcus pneumoniae	n.d	PN	Gram	Respiratory	Bacillus subtilis	ATCC6633	Spherical	None	None	0	v	0.452	0	0.072	0.074	PND-0.1%-	0.00745884	0.0793328	-0.147	-0.15	-0.001	-0.002
470	CuPNN/AAmoxicillin	1.65206	70.7494	-1.97648	0.83917	1	0.121694	CHEMBL1082	Cu	PN	N/A	Amoxicillin	MIC50 ug.mL-1	-1	21.529	MIC (uM)	Streptococcus pneumoniae	n.d	PN	Gram	Respiratory	Bacillus subtilis	ATCC6633	Spherical	None	None	0	t	0.488	0	0.072	0.074	PND-0.1%-	0.00745884	0.0793328	-0.147	-0.15	-0.001	-0.002
471	CuPNN/AAmoxicillin	1.29364	70.391	-2.33491	0.784762	1	0.0882728	CHEMBL1082	Cu	PN	N/A	Amoxicillin	MIC ug.mL-1	-1	50	MIC (uM)	Streptococcus pneumoniae	n.d	PN	Gram	Respiratory	Bacillus subtilis	ATCC6633	Spherical	None	None	0	v	0.424	0	0.072	0.074	PND-0.1%-	0.00745884	0.0793328	-0.147	-0.15	-0.001	-0.002
472	CuPNN/AAmoxicillin	1.29364	70.391	-2.33491	0.784762	1	0.0882728	CHEMBL1082	Cu	PN	N/A	Amoxicillin	MIC ug.mL-1	-1	50	MIC (uM)	Streptococcus pneumoniae	n.d	PN	Gram	Respiratory	Bacillus subtilis	ATCC6633	Spherical	None	None	0	t	0.424	0	0.072	0.074	PND-0.1%-	0.00745884	0.0793328	-0.147	-0.15	-0.001	-0.002
473	CuIPNN/AAmoxicillin	3.45473	72.5521	-0.173817	0.969372	1	0.456655	CHEMBL1082	CuI	PN	N/A	Amoxicillin	MIC ug.mL-1	-1	50	MIC (uM)	Streptococcus pneumoniae	P-54988	PN	Gram	Respiratory	Escherichia coli	K-12	N/A	None	None	0	t	0.424	0	0.072	0.074	PND-0.1%-	0.00745884	0.0793328	-0.143	-0.15	-0.001	0
474	CuIPNN/AAmoxicillin	2.93746	72.0348	-0.691084	0.949667	1	0.333792	CHEMBL1082	CuI	PN	N/A	Amoxicillin	Activity -	1	5	MIC (uM)	Streptococcus pneumoniae	WT3	PN	Gram	Respiratory	Escherichia coli	K-12	N/A	None	None	0	t	0.327	0	0.072	0.074	PND-0.1%-	0.00745884	0.0793328	-0.143	-0.15	-0.001	0.001
475	AgPNN/AAmoxicillin	4.54892	73.6463	0.920377	0.989532	1	0.715119	CHEMBL1082	Ag	PN	N/A	Amoxicillin	MIC ug.mL-1	-1	50	MIC (uM)	Streptococcus pneumoniae	N1387	PN	Gram	Respiratory	Escherichia coli	ATCC25922	Spherical	None	None	0	v	0.424	0	0.072	0.074	PND-0.1%-	0.00745884	0.0793328	-0.147	-0.135	0	0
476	AgPNN/AAmoxicillin	4.65379	73.7511	1.02524	0.990564	1	0.735992	CHEMBL1082	Ag	PN	N/A	Amoxicillin	MIC90 ug.mL-1	-1	34.891	MIC (uM)	Streptococcus pneumoniae	serotype 19F	PN	Gram	Respiratory	Escherichia coli	ATCC25922	Spherical	None	None	0	t	0.452	0	0.072	0.074	PND-0.1%-	0.00745884	0.0793328	-0.147	-0.135	0	-0.002
477	AgPNN/AAmoxicillin	4.54892	73.6463	0.920377	0.989532	1	0.715119	CHEMBL1082	Ag	PN	N/A	Amoxicillin	MIC ug.mL-1	-1	50	MIC (uM)	Streptococcus pneumoniae	serotype 6B	PN	Gram	Respiratory	Escherichia coli	ATCC25922	Spherical	None	None	0	t	0.424	0	0.072	0.074	PND-0.1%-	0.00745884	0.0793328	-0.147	-0.135	0	0
478	AgPNN/AAmoxicillin	3.42789	72.5252	-0.200653	0.968565	1	0.450004	CHEMBL1082	Ag	PN	N/A	Amoxicillin	MIC90 ug.mL-1	-1	34.891	MIC (uM)	Streptococcus pneumoniae	n.d	PN	Gram	Respiratory	Bacillus subtilis	ATCC6633	Spherical	None	None	0	t	0.452	0	0.072	0.074	PND-0.1%-	0.00745884	0.0793328	-0.147	-0.135	-0.001	-0.002
479	AgPNN/AAmoxicillin	3.27108	72.3684	-0.357465	0.963423	1	0.411573	CHEMBL1082	Ag	PN	N/A	Amoxicillin	MIC ug.mL-1	-1	50	MIC (uM)	Streptococcus pneumoniae	n.d	PN	Gram	Respiratory	Bacillus subtilis	ATCC6633	Spherical	None	None	0	t	0.424	0	0.072	0.074	PND-0.1%-	0.00745884	0.0793328	-0.147	-0.135	-0.001	-0.002
480	AgPNN/AAmoxicillin	3.27108	72.3684	-0.357465	0.963423	1	0.411573	CHEMBL1082	Ag	PN	N/A	Amoxicillin	MIC ug.mL-1	-1	50	MIC (uM)	Streptococcus pneumoniae	n.d	PN	Gram	Respiratory	Bacillus subtilis	ATCC6633	Spherical	None	None	0	t	0.424	0	0.072	0.074	PND-0.1%-	0.00745884	0.0793328	-0.147	-0.135	-0.001	-0.002
481	CuOPNN/AAmoxicillin	2.87796	71.9753	-0.750587	0.946746	1	0.320693	CHEMBL1082	CuO	PN	N/A	Amoxicillin	MIC50 ug.mL-1	-1	21.529	MIC (uM)	Streptococcus pneumoniae	n.d	PN	Gram	Respiratory	Bacillus sbtilis	MD	N/A	None	None	0	t	0.488	0	0.072	0.074	PND-0.1%-	0.00745884	0.0793328	-0.147	-0.15	0	-0.002
482	CuOPNN/AAmoxicillin	1.21464	70.312	-2.41391	0.771118	1	0.0821182	CHEMBL1082	CuO	PN	N/A	Amoxicillin	Activity %	1	70	MIC (uM)	Streptococcus pneumoniae	n.d	PN	Gram	Respiratory	Escherichia coli	MD	N/A	None	None	0	t	0.191	0	0.072	0.074	PND-0.1%-	0.00745884	0.0793328	-0.147	-0.15	0	-0.002
483	CuOPNN/AAmoxicillin	2.17336	71.2707	-1.45518	0.897832	1	0.189206	CHEMBL1082	CuO	PN	N/A	Amoxicillin	log10CFU/ml -	-1	1.979	MIC (uM)	Streptococcus pneumoniae	P-15986	PN	Gram	Respiratory	Escherichia coli	MD	N/A	None	None	0	t	0.339	0	0.072	0.074	PND-0.1%-	0.00745884	0.0793328	-0.147	-0.15	0	0.003
484	CuIPNN/AAmoxicillin	3.68946	72.7868	0.0609146	0.975624	1	0.515224	CHEMBL1082	CuI	PN	N/A	Amoxicillin	MIC90 ug.mL-1	-1	34.891	MIC (uM)	Streptococcus pneumoniae	serotype 19A	PN	Gram	Respiratory	Escherichia coli	ATCC10536	N/A	None	None	0	t	0.452	0	0.072	0.074	PND-0.1%-	0.00745884	0.0793328	-0.143	-0.15	-0.001	0.003
485	CuOPNN/AAmoxicillin	1.21464	70.312	-2.41391	0.771118	1	0.0821182	CHEMBL1082	CuO	PN	N/A	Amoxicillin	Activity %	1	70	MIC (uM)	Streptococcus pneumoniae	n.d	PN	Gram	Respiratory	Escherichia coli	MD	N/A	None	None	0	v	0.191	0	0.072	0.074	PND-0.1%-	0.00745884	0.0793328	-0.147	-0.15	0	-0.002
486	CuOPNN/AAmoxicillin	2.67634	71.7737	-0.952202	0.935616	1	0.278442	CHEMBL1082	CuO	PN	N/A	Amoxicillin	MIC90 ug.mL-1	-1	34.891	MIC (uM)	Streptococcus pneumoniae	n.d	PN	Gram	Respiratory	Bacillus sbtilis	MD	N/A	None	None	0	v	0.452	0	0.072	0.074	PND-0.1%-	0.00745884	0.0793328	-0.147	-0.15	0	-0.002
487	CuOPNN/AAmoxicillin	2.87796	71.9753	-0.750587	0.946746	1	0.320693	CHEMBL1082	CuO	PN	N/A	Amoxicillin	MIC50 ug.mL-1	-1	21.529	MIC (uM)	Streptococcus pneumoniae	n.d	PN	Gram	Respiratory	Bacillus sbtilis	MD	N/A	None	None	0	t	0.488	0	0.072	0.074	PND-0.1%-	0.00745884	0.0793328	-0.147	-0.15	0	-0.002
488	CuIPNN/AAmoxicillin	3.55959	72.6569	-0.0689529	0.972337	1	0.482769	CHEMBL1082	CuI	PN	N/A	Amoxicillin	MIC90 ug.mL-1	-1	34.891	MIC (uM)	Streptococcus pneumoniae	n.d	PN	Gram	Respiratory	Bacillus subtilis	ATCC6633	N/A	None	None	0	v	0.452	0	0.072	0.074	PND-0.1%-	0.00745884	0.0793328	-0.143	-0.15	-0.001	-0.002
489	CuIPNN/AAmoxicillin	3.40278	72.5001	-0.225764	0.967791	1	0.443797	CHEMBL1082	CuI	PN	N/A	Amoxicillin	MIC ug.mL-1	-1	50	MIC (uM)	Streptococcus pneumoniae	n.d	PN	Gram	Respiratory	Bacillus subtilis	ATCC6633	N/A	None	None	0	t	0.424	0	0.072	0.074	PND-0.1%-	0.00745884	0.0793328	-0.143	-0.15	-0.001	-0.002
490	CuIPNN/AAmoxicillin	3.40278	72.5001	-0.225764	0.967791	1	0.443797	CHEMBL1082	CuI	PN	N/A	Amoxicillin	MIC ug.mL-1	-1	50	MIC (uM)	Streptococcus pneumoniae	n.d	PN	Gram	Respiratory	Bacillus subtilis	ATCC6633	N/A	None	None	0	v	0.424	0	0.072	0.074	PND-0.1%-	0.00745884	0.0793328	-0.143	-0.15	-0.001	-0.002
491	CuOPNN/AAmoxicillin	2.83218	71.9295	-0.796361	0.94439	1	0.310805	CHEMBL1082	CuO	PN	N/A	Amoxicillin	MIC90 ug.mL-1	-1	34.891	MIC (uM)	Streptococcus pneumoniae	ATCC49619	PN	Gram	Respiratory	Bacillus sbtilis	MD	N/A	None	None	0	t	0.452	0	0.072	0.074	PND-0.1%-	0.00745884	0.0793328	-0.147	-0.15	0	0.004
492	CuOPNN/AAmoxicillin	2.67634	71.7737	-0.952202	0.935616	1	0.278442	CHEMBL1082	CuO	PN	N/A	Amoxicillin	MIC90 ug.mL-1	-1	34.891	MIC (uM)	Streptococcus pneumoniae	n.d	PN	Gram	Respiratory	Bacillus sbtilis	MD	N/A	None	None	0	v	0.452	0	0.072	0.074	PND-0.1%-	0.00745884	0.0793328	-0.147	-0.15	0	-0.002
493	CuOPNN/AAmoxicillin	2.87796	71.9753	-0.750587	0.946746	1	0.320693	CHEMBL1082	CuO	PN	N/A	Amoxicillin	MIC50 ug.mL-1	-1	21.529	MIC (uM)	Streptococcus pneumoniae	n.d	PN	Gram	Respiratory	Bacillus sbtilis	MD	N/A	None	None	0	t	0.488	0	0.072	0.074	PND-0.1%-	0.00745884	0.0793328	-0.147	-0.15	0	-0.002
494	CuOPNN/AAmoxicillin	2.51953	71.6169	-1.10901	0.9255	1	0.248055	CHEMBL1082	CuO	PN	N/A	Amoxicillin	MIC ug.mL-1	-1	50	MIC (uM)	Streptococcus pneumoniae	n.d	PN	Gram	Respiratory	Bacillus sbtilis	MD	N/A	None	None	0	v	0.424	0	0.072	0.074	PND-0.1%-	0.00745884	0.0793328	-0.147	-0.15	0	-0.002
495	CuOPNN/AAmoxicillin	1.21464	70.312	-2.41391	0.771118	1	0.0821182	CHEMBL1082	CuO	PN	N/A	Amoxicillin	Activity %	1	70	MIC (uM)	Streptococcus pneumoniae	n.d	PN	Gram	Respiratory	Escherichia coli	MD	N/A	None	None	0	t	0.191	0	0.072	0.074	PND-0.1%-	0.00745884	0.0793328	-0.147	-0.15	0	-0.002
496	CuOPNN/AAmoxicillin	1.29256	70.3899	-2.33599	0.78458	1	0.088186	CHEMBL1082	CuO	PN	N/A	Amoxicillin	Activity %	1	70	MIC (uM)	Streptococcus pneumoniae	serotype 11A	PN	Gram	Respiratory	Escherichia coli	MD	N/A	None	None	0	t	0.191	0	0.072	0.074	PND-0.1%-	0.00745884	0.0793328	-0.147	-0.15	0	0.001
497	CuOPNN/AAmoxicillin	2.67634	71.7737	-0.952202	0.935616	1	0.278442	CHEMBL1082	CuO	PN	N/A	Amoxicillin	MIC90 ug.mL-1	-1	34.891	MIC (uM)	Streptococcus pneumoniae	n.d	PN	Gram	Respiratory	Bacillus sbtilis	MD	N/A	None	None	0	t	0.452	0	0.072	0.074	PND-0.1%-	0.00745884	0.0793328	-0.147	-0.15	0	-0.002
498	CuOPNN/AAmoxicillin	2.87796	71.9753	-0.750587	0.946746	1	0.320693	CHEMBL1082	CuO	PN	N/A	Amoxicillin	MIC50 ug.mL-1	-1	21.529	MIC (uM)	Streptococcus pneumoniae	n.d	PN	Gram	Respiratory	Bacillus sbtilis	MD	N/A	None	None	0	t	0.488	0	0.072	0.074	PND-0.1%-	0.00745884	0.0793328	-0.147	-0.15	0	-0.002
499	CuOPNN/AAmoxicillin	2.51953	71.6169	-1.10901	0.9255	1	0.248055	CHEMBL1082	CuO	PN	N/A	Amoxicillin	MIC ug.mL-1	-1	50	MIC (uM)	Streptococcus pneumoniae	n.d	PN	Gram	Respiratory	Bacillus sbtilis	MD	N/A	None	None	0	t	0.424	0	0.072	0.074	PND-0.1%-	0.00745884	0.0793328	-0.147	-0.15	0	-0.002
500	AgPNN/AAmoxicillin	2.84699	71.9443	-0.781553	0.945163	1	0.313985	CHEMBL1082	Ag	PN	N/A	Amoxicillin	log10CFU/ml -	-1	1.979	MIC (uM)	Streptococcus pneumoniae	P-54988	PN	Gram	Respiratory	Escherichia coli	K-12	Spherical	None	None	0	t	0.339	0	0.072	0.074	PND-0.1%-	0.00745884	0.0793328	-0.147	-0.135	-0.001	0
501	AgPNN/AAmoxicillin	2.80576	71.9031	-0.822784	0.942986	1	0.305173	CHEMBL1082	Ag	PN	N/A	Amoxicillin	Activity -	1	5	MIC (uM)	Streptococcus pneumoniae	WT3	PN	Gram	Respiratory	Escherichia coli	K-12	Spherical	None	None	0	v	0.327	0	0.072	0.074	PND-0.1%-	0.00745884	0.0793328	-0.147	-0.135	-0.001	0.001
502	CuPNN/AAmoxicillin	2.67634	71.7737	-0.952202	0.935616	1	0.278442	CHEMBL1082	Cu	PN	N/A	Amoxicillin	MIC90 ug.mL-1	-1	34.891	MIC (uM)	Streptococcus pneumoniae	serotype 19F	PN	Gram	Respiratory	Escherichia coli	ATCC25922	Spherical	None	None	0	t	0.452	0	0.072	0.074	PND-0.1%-	0.00745884	0.0793328	-0.147	-0.15	0	-0.002
503	CuPNN/AAmoxicillin	2.51953	71.6169	-1.10901	0.9255	1	0.248055	CHEMBL1082	Cu	PN	N/A	Amoxicillin	MIC ug.mL-1	-1	50	MIC (uM)	Streptococcus pneumoniae	serotype 3	PN	Gram	Respiratory	Escherichia coli	ATCC25922	Spherical	None	None	0	t	0.424	0	0.072	0.074	PND-0.1%-	0.00745884	0.0793328	-0.147	-0.15	0	-0.002
504	CuPNN/AAmoxicillin	2.72829	71.8256	-0.900255	0.938675	1	0.288998	CHEMBL1082	Cu	PN	N/A	Amoxicillin	MIC90 ug.mL-1	-1	34.891	MIC (uM)	Streptococcus pneumoniae	serotype 7F	PN	Gram	Respiratory	Escherichia coli	ATCC25922	Spherical	None	None	0	v	0.452	0	0.072	0.074	PND-0.1%-	0.00745884	0.0793328	-0.147	-0.15	0	0
505	CuPNN/AAmoxicillin	1.39683	70.4942	-2.23171	0.801681	1	0.0969388	CHEMBL1082	Cu	PN	N/A	Amoxicillin	log10CFU/ml -	-1	1.979	MIC (uM)	Streptococcus pneumoniae	P-54988	PN	Gram	Respiratory	Escherichia coli	K-12	Spherical	None	None	0	t	0.339	0	0.072	0.074	PND-0.1%-	0.00745884	0.0793328	-0.146	-0.15	-0.001	0
506	SiO2PNDMAAmoxicillin	3.13914	72.2365	-0.489404	0.958479	1	0.380034	CHEMBL1082	SiO2	PN	DMA	Amoxicillin	Activity %	1	70	MIC (uM)	Streptococcus pneumoniae	serotype 23A	PN	Gram	Respiratory	Escherichia coli	ATCC25922	N/A	Single	Monomer	0	t	0.191	0	0.072	0.074	PND-0.1%-	0.00745884	0.0793328	-0.148	-0.15	0.002	-0.002
507	SiO2PNDMAAmoxicillin	4.60085	73.6982	0.972303	0.990057	1	0.725578	CHEMBL1082	SiO2	PN	DMA	Amoxicillin	MIC90 ug.mL-1	-1	34.891	MIC (uM)	Streptococcus pneumoniae	serotype 15A	PN	Gram	Respiratory	Escherichia coli	ATCC25922	N/A	Single	Monomer	0	t	0.452	0	0.072	0.074	PND-0.1%-	0.00745884	0.0793328	-0.148	-0.15	0.002	-0.002
508	CuOSTN/AAmoxicillin	3.08457	74.2398	-0.872919	0.956252	1	0.294647	CHEMBL1082	CuO	ST	N/A	Amoxicillin	MIC ug.mL-1	-1	50	IC50 (uM)	Streptococcus pyogenes	n.d	ST	Gram	Respiratory	Escherichia coli	ATCC25254	N/A	None	None	0	t	0.08	0	0.074	0.075	STD-0.1%-	0.00734064	0.0812488	-0.145	-0.15	0.001	0.001
509	La2O3STN/AAmoxicillin	3.08457	74.2398	-0.872919	0.956252	1	0.294647	CHEMBL1082	La2O3	ST	N/A	Amoxicillin	MIC ug.mL-1	-1	50	IC50 (uM)	Streptococcus pyogenes	n.d	ST	Gram	Respiratory	Escherichia coli	ATCC25254	N/A	None	None	0	v	0.08	0	0.074	0.075	STD-0.1%-	0.00734064	0.0812488	-0.145	-0.15	0.001	0.001
510	Al2O3STN/AAmoxicillin	3.08457	74.2398	-0.872919	0.956252	1	0.294647	CHEMBL1082	Al2O3	ST	N/A	Amoxicillin	MIC ug.mL-1	-1	50	IC50 (uM)	Streptococcus pyogenes	n.d	ST	Gram	Respiratory	Escherichia coli	ATCC25254	N/A	None	None	0	t	0.08	0	0.074	0.075	STD-0.1%-	0.00734064	0.0812488	-0.145	-0.15	0.001	0.001
511	AuSTPDT/DMBAmoxicillin	7.41498	78.5702	3.4575	0.999398	1	0.969454	CHEMBL1082	Au	ST	PDT/DMB	Amoxicillin	MIC50 ug.mL-1	-1	21.529	MBC (uM)	Streptococcus pyogenes	n.d	ST	Gram	Respiratory	Escherichia coli	MDR	Spherical	Double	Monomer	0	t	0.373	0	0.074	0.075	STD-0.1%-	0.00734064	0.0812488	-0.143	-0.119	-0.001	0.001
512	AuSTPDT/CPBAmoxicillin	8.73328	79.8885	4.77579	0.999839	1	0.991639	CHEMBL1082	Au	ST	PDT/CPB	Amoxicillin	MIC50 ug.mL-1	-1	21.529	MBC (uM)	Streptococcus pyogenes	n.d	ST	Gram	Respiratory	Escherichia coli	MDR	Spherical	Double	Monomer	0	v	0.373	0	0.074	0.075	STD-0.1%-	0.00734064	0.0812488	-0.143	-0.109	-0.001	0.001
513	CuOSTN/AAmoxicillin	0.372867	71.5281	-3.58462	0.592152	1	0.0269982	CHEMBL1082	CuO	ST	N/A	Amoxicillin	IC50 ug.mL-1	1	2000	MBC (uM)	Streptococcus pyogenes	n.d	ST	Gram	Respiratory	Bacillus sbtilis	MD	N/A	None	None	0	t	0.003	0	0.074	0.075	STD-0.1%-	0.00734064	0.0812488	-0.147	-0.15	0	0.001
514	AgSTN/AAmoxicillin	2.54692	73.7021	-1.41057	0.927366	1	0.196145	CHEMBL1082	Ag	ST	N/A	Amoxicillin	MBC90 mg/L	-1	50.303	MBC (uM)	Streptococcus pyogenes	n.d	ST	Gram	Respiratory	Bacillus subtilis	ATCC6633	Spherical	None	None	0	t	0.257	0	0.074	0.075	STD-0.1%-	0.00734064	0.0812488	-0.147	-0.135	-0.001	0.001
515	CuISTN/AAmoxicillin	3.36033	74.5155	-0.597158	0.966441	1	0.354994	CHEMBL1082	CuI	ST	N/A	Amoxicillin	IZ mm	1	5	MBC (uM)	Streptococcus pyogenes	ATCC12384	ST	Gram	Respiratory	Escherichia coli	ATCC10536	N/A	None	None	0	t	0.388	0	0.074	0.075	STD-0.1%-	0.00734064	0.0812488	-0.143	-0.15	-0.001	-0.001
516	CuOSTN/AAmoxicillin	2.52902	73.6842	-1.42846	0.926152	1	0.193339	CHEMBL1082	CuO	ST	N/A	Amoxicillin	IZ mm	1	5	MBC (uM)	Streptococcus pyogenes	n.d	ST	Gram	Respiratory	Bacillus sbtilis	MD	N/A	None	None	0	v	0.388	0	0.074	0.075	STD-0.1%-	0.00734064	0.0812488	-0.147	-0.15	0	0.001
517	CuOSTN/AAmoxicillin	1.79537	72.9506	-2.16211	0.857585	1	0.103205	CHEMBL1082	CuO	ST	N/A	Amoxicillin	MBC50 mg/L	-1	13.818	MBC (uM)	Streptococcus pyogenes	n.d	ST	Gram	Respiratory	Bacillus sbtilis	MD	N/A	None	None	0	t	0.257	0	0.074	0.075	STD-0.1%-	0.00734064	0.0812488	-0.147	-0.15	0	0.001
518	CuOSTN/AAmoxicillin	2.52902	73.6842	-1.42846	0.926152	1	0.193339	CHEMBL1082	CuO	ST	N/A	Amoxicillin	IZ mm	1	5	MBC (uM)	Streptococcus pyogenes	n.d	ST	Gram	Respiratory	Bacillus sbtilis	MD	N/A	None	None	0	t	0.388	0	0.074	0.075	STD-0.1%-	0.00734064	0.0812488	-0.147	-0.15	0	0.001
519	CuSTN/AAmoxicillin	0.892757	72.048	-3.06473	0.709459	1	0.0445859	CHEMBL1082	Cu	ST	N/A	Amoxicillin	MIC ug.mL-1	-1	50	MBC (uM)	Streptococcus pyogenes	1308007P	ST	Gram	Respiratory	Escherichia coli	ATCC10536	Spherical	None	None	0	v	0.324	0	0.074	0.075	STD-0.1%-	0.00734064	0.0812488	-0.147	-0.15	-0.001	-0.001
520	AgSTGlutathioneAmoxicillin	2.33147	73.4867	-1.62602	0.91145	1	0.164377	CHEMBL1082	Ag	ST	Glutathione	Amoxicillin	MIC ug.mL-1	-1	50	Microb-Eff	Streptococcus pyogenes	1308007P	ST	Gram	Respiratory	Escherichia coli	ATCC10536	Spherical	Single	Monomer	0	t	0.362	0	0.074	0.075	STD-0.1%-	0.00734064	0.0812488	-0.147	-0.15	0	-0.001
521	AuSTPDT/MelAmoxicillin	11.285	82.4402	7.3275	0.999987	1	0.999343	CHEMBL1082	Au	ST	PDT/Mel	Amoxicillin	MIC90 ug.mL-1	-1	34.891	MIC (uM)	Streptococcus pyogenes	n.d	ST	Gram	Respiratory	Escherichia coli	ATCC11775	Spherical	Double	Monomer	0	t	0.452	0	0.074	0.075	STD-0.1%-	0.00734064	0.0812488	-0.143	-0.093	-0.001	0.001
522	AuSTPDT/CQAmoxicillin	9.5712	80.7264	5.61372	0.99993	1	0.996366	CHEMBL1082	Au	ST	PDT/CQ	Amoxicillin	MIC90 ug.mL-1	-1	34.891	MIC (uM)	Streptococcus pyogenes	n.d	ST	Gram	Respiratory	Escherichia coli	ATCC11775	Spherical	Double	Monomer	0	t	0.452	0	0.074	0.075	STD-0.1%-	0.00734064	0.0812488	-0.143	-0.106	-0.001	0.001
523	AuSTPDT/CPBAmoxicillin	9.17571	80.3309	5.21823	0.999896	1	0.994612	CHEMBL1082	Au	ST	PDT/CPB	Amoxicillin	MIC90 ug.mL-1	-1	34.891	MIC (uM)	Streptococcus pyogenes	n.d	ST	Gram	Respiratory	Escherichia coli	ATCC11775	Spherical	Double	Monomer	0	t	0.452	0	0.074	0.075	STD-0.1%-	0.00734064	0.0812488	-0.143	-0.109	-0.001	0.001
524	AuSTPDT/GAmoxicillin	9.94171	81.0969	5.98422	0.999952	1	0.997488	CHEMBL1082	Au	ST	PDT/G	Amoxicillin	MIC ug.mL-1	-1	50	MIC (uM)	Streptococcus pyogenes	n.d	ST	Gram	Respiratory	Escherichia coli	ATCC11775	Spherical	Double	Monomer	0	t	0.424	0	0.074	0.075	STD-0.1%-	0.00734064	0.0812488	-0.143	-0.102	-0.001	0.001
525	AuSTPDTAmoxicillin	5.72316	76.8784	1.76568	0.996741	1	0.853919	CHEMBL1082	Au	ST	PDT	Amoxicillin	MIC ug.mL-1	-1	50	MIC (uM)	Streptococcus pyogenes	n.d	ST	Gram	Respiratory	Escherichia coli	ATCC11775	Spherical	Single	Monomer	0	v	0.424	0	0.074	0.075	STD-0.1%-	0.00734064	0.0812488	-0.143	-0.134	-0.001	0.001
526	AuSTPDTAmoxicillin	5.72316	76.8784	1.76568	0.996741	1	0.853919	CHEMBL1082	Au	ST	PDT	Amoxicillin	MIC ug.mL-1	-1	50	MIC (uM)	Streptococcus pyogenes	1307006P	ST	Gram	Respiratory	Escherichia coli	MDR	Spherical	Single	Monomer	0	t	0.424	0	0.074	0.075	STD-0.1%-	0.00734064	0.0812488	-0.143	-0.134	-0.001	0.001
527	AuSTPDTAmoxicillin	5.67121	76.8264	1.71373	0.996568	1	0.847319	CHEMBL1082	Au	ST	PDT	Amoxicillin	MIC ug.mL-1	-1	50	MIC (uM)	Streptococcus pyogenes	ATCC12384	ST	Gram	Respiratory	Escherichia coli	MDR	Spherical	Single	Monomer	0	t	0.424	0	0.074	0.075	STD-0.1%-	0.00734064	0.0812488	-0.143	-0.134	-0.001	-0.001
528	AuSTPDT/CPBAmoxicillin	9.0189	80.1741	5.06142	0.999879	1	0.993703	CHEMBL1082	Au	ST	PDT/CPB	Amoxicillin	MIC ug.mL-1	-1	50	MIC (uM)	Streptococcus pyogenes	1307006P	ST	Gram	Respiratory	Escherichia coli	MDR	Spherical	Double	Monomer	0	t	0.424	0	0.074	0.075	STD-0.1%-	0.00734064	0.0812488	-0.143	-0.109	-0.001	0.001
529	CuOSTN/AAmoxicillin	3.19547	74.3507	-0.762011	0.960664	1	0.31821	CHEMBL1082	CuO	ST	N/A	Amoxicillin	IZ mm	1	5	MIC (uM)	Streptococcus pyogenes	n.d	ST	Gram	Respiratory	Bacillus sbtilis	MD	N/A	None	None	0	v	0.507	0	0.074	0.075	STD-0.1%-	0.00734064	0.0812488	-0.147	-0.15	0	0.001
530	CuOSTN/AAmoxicillin	3.19547	74.3507	-0.762011	0.960664	1	0.31821	CHEMBL1082	CuO	ST	N/A	Amoxicillin	IZ mm	1	5	MIC (uM)	Streptococcus pyogenes	n.d	ST	Gram	Respiratory	Bacillus sbtilis	MD	N/A	None	None	0	t	0.507	0	0.074	0.075	STD-0.1%-	0.00734064	0.0812488	-0.147	-0.15	0	0.001
531	CuOSTN/AAmoxicillin	3.19547	74.3507	-0.762011	0.960664	1	0.31821	CHEMBL1082	CuO	ST	N/A	Amoxicillin	IZ mm	1	5	MIC (uM)	Streptococcus pyogenes	n.d	ST	Gram	Respiratory	Bacillus sbtilis	MD	N/A	None	None	0	t	0.507	0	0.074	0.075	STD-0.1%-	0.00734064	0.0812488	-0.147	-0.15	0	0.001
532	AgPALactoseAmoxicillin	2.53505	17.4898	2.62378	0.926563	1	0.932377	CHEMBL1082	Ag	PA	Lactose	Amoxicillin	MIC ug.mL-1	-1	50	MIC (uM)	Pseudomonas aeruginosa	PU21	PA	Gram-	Systemic	Pseudomonas aeruginosa	ATCC27853	Spherical	Single	Monomer	0	t	0.424	0	0.021	0.022	PAD-0.1%-	0.00780707	0.0289235	-0.144	-0.15	-0.001	0
533	AgPALactoseAmoxicillin	2.17909	17.1338	2.26782	0.898356	1	0.906177	CHEMBL1082	Ag	PA	Lactose	Amoxicillin	MIC ug.mL-1	-1	50	MIC (uM)	Pseudomonas aeruginosa	KG2505	PA	Gram-	Systemic	Pseudomonas aeruginosa	MD	Spherical	Single	Monomer	0	t	0.424	0	0.021	0.022	PAD-0.1%-	0.00780707	0.0289235	-0.147	-0.15	0	0
534	AuPAPDT/GAmoxicillin	8.86287	23.8176	8.9516	0.999858	1	0.99987	CHEMBL1082	Au	PA	PDT/G	Amoxicillin	MIC ug.mL-1	-1	50	MIC (uM)	Pseudomonas aeruginosa	PU21	PA	Gram-	Systemic	Pseudomonas aeruginosa	ATCC27853	Spherical	Double	Monomer	0	t	0.424	0	0.021	0.022	PAD-0.1%-	0.00780707	0.0289235	-0.144	-0.102	-0.001	0
535	AuPAPDT/GAmoxicillin	8.86287	23.8176	8.9516	0.999858	1	0.99987	CHEMBL1082	Au	PA	PDT/G	Amoxicillin	MIC ug.mL-1	-1	50	MIC (uM)	Pseudomonas aeruginosa	166301	PA	Gram-	Systemic	Pseudomonas aeruginosa	ATCC27853	Spherical	Double	Monomer	0	v	0.424	0	0.021	0.022	PAD-0.1%-	0.00780707	0.0289235	-0.144	-0.102	-0.001	0
536	AuPAPDT/CPBAmoxicillin	7.94006	22.8948	8.02879	0.999644	1	0.999674	CHEMBL1082	Au	PA	PDT/CPB	Amoxicillin	MIC ug.mL-1	-1	50	MIC (uM)	Pseudomonas aeruginosa	PU21	PA	Gram-	Systemic	Pseudomonas aeruginosa	ATCC27853	Spherical	Double	Monomer	0	t	0.424	0	0.021	0.022	PAD-0.1%-	0.00780707	0.0289235	-0.144	-0.109	-0.001	0
537	AuPAPDT/AChAmoxicillin	7.94006	22.8948	8.02879	0.999644	1	0.999674	CHEMBL1082	Au	PA	PDT/ACh	Amoxicillin	MIC ug.mL-1	-1	50	MIC (uM)	Pseudomonas aeruginosa	PU21	PA	Gram-	Systemic	Pseudomonas aeruginosa	ATCC27853	Spherical	Double	Monomer	0	t	0.424	0	0.021	0.022	PAD-0.1%-	0.00780707	0.0289235	-0.144	-0.109	-0.001	0
538	AgPAMaltoseAmoxicillin	2.53505	17.4898	2.62378	0.926563	1	0.932377	CHEMBL1082	Ag	PA	Maltose	Amoxicillin	MIC ug.mL-1	-1	50	MIC (uM)	Pseudomonas aeruginosa	9551	PA	Gram-	Systemic	Pseudomonas aeruginosa	ATCC27853	Spherical	Single	Monomer	0	t	0.424	0	0.021	0.022	PAD-0.1%-	0.00780707	0.0289235	-0.144	-0.15	-0.001	0
539	AuPAPDT/MelAmoxicillin	10.5766	25.5313	10.6654	0.999974	1	0.999977	CHEMBL1082	Au	PA	PDT/Mel	Amoxicillin	MIC ug.mL-1	-1	50	MIC (uM)	Pseudomonas aeruginosa	CGMCC 1.1162	PA	Gram-	Systemic	Pseudomonas aeruginosa	MDR	Spherical	Double	Monomer	0	v	0.424	0	0.021	0.022	PAD-0.1%-	0.00780707	0.0289235	-0.143	-0.093	-0.001	0
540	AuPAPDT/MelAmoxicillin	10.0234	24.9781	10.1121	0.999956	1	0.999959	CHEMBL1082	Au	PA	PDT/Mel	Amoxicillin	MIC ug.mL-1	-1	50	MIC (uM)	Pseudomonas aeruginosa	n.d	PA	Gram-	Systemic	Pseudomonas aeruginosa	ATCC27853	Spherical	Double	Monomer	0	t	0.424	0	0.021	0.022	PAD-0.1%-	0.00780707	0.0289235	-0.144	-0.093	-0.001	-0.001
541	AgPAMaltoseAmoxicillin	2.12714	17.0819	2.21587	0.893513	1	0.901666	CHEMBL1082	Ag	PA	Maltose	Amoxicillin	MIC ug.mL-1	-1	50	MIC (uM)	Pseudomonas aeruginosa	ATCC27853	PA	Gram-	Systemic	Pseudomonas aeruginosa	MD	Spherical	Single	Monomer	0	t	0.424	0	0.021	0.022	PAD-0.1%-	0.00780707	0.0289235	-0.147	-0.15	0	-0.002
542	AgPAPVPAmoxicillin	2.50908	17.4638	2.59781	0.924776	1	0.93072	CHEMBL1082	Ag	PA	PVP	Amoxicillin	MIC ug.mL-1	-1	50	MIC (uM)	Pseudomonas aeruginosa	n.d	PA	Gram-	Systemic	Pseudomonas aeruginosa	ATCC27853	Spherical	Single	Polymer	0	t	0.424	0	0.021	0.022	PAD-0.1%-	0.00780707	0.0289235	-0.144	-0.15	-0.001	-0.001
543	AgPAPVPAmoxicillin	2.17909	17.1338	2.26782	0.898356	1	0.906177	CHEMBL1082	Ag	PA	PVP	Amoxicillin	MIC ug.mL-1	-1	50	MIC (uM)	Pseudomonas aeruginosa	KG2505	PA	Gram-	Systemic	Pseudomonas aeruginosa	MD	Spherical	Single	Polymer	0	v	0.424	0	0.021	0.022	PAD-0.1%-	0.00780707	0.0289235	-0.147	-0.15	0	0
544	AuPAPDTAmoxicillin	4.63754	19.5923	4.72627	0.990411	1	0.991218	CHEMBL1082	Au	PA	PDT	Amoxicillin	MIC ug.mL-1	-1	50	MBC (uM)	Pseudomonas aeruginosa	ATCC278533	PA	Gram-	Systemic	Pseudomonas aeruginosa	MDR	Spherical	Single	Monomer	0	t	0.324	0	0.021	0.022	PAD-0.1%-	0.00780707	0.0289235	-0.143	-0.134	-0.001	0.001
545	AuPAPDTAmoxicillin	4.05831	19.013	4.14704	0.983015	1	0.984435	CHEMBL1082	Au	PA	PDT	Amoxicillin	MIC ug.mL-1	-1	50	MBC (uM)	Pseudomonas aeruginosa	n.d	PA	Gram-	Systemic	Pseudomonas aeruginosa	ATCC27853	Spherical	Single	Monomer	0	t	0.324	0	0.021	0.022	PAD-0.1%-	0.00780707	0.0289235	-0.144	-0.134	-0.001	-0.001
546	AuPAPDT/DMBAmoxicilline	6.92147	21.8762	7.0102	0.999015	1	0.999098	CHEMBL1082	Au	PA	PDT/DMB	Amoxicilline	IZ mm	1	5	MBC (uM)	Pseudomonas aeruginosa	n.d	PA	Gram-	Systemic	Pseudomonas aeruginosa	MDR	Spherical	Double	Monomer	1	t	0.388	0	0.021	0.022	PAD-0.1%-	0.00780707	0.0289235	-0.143	-0.119	-0.001	-0.001
547	AuPAPDT/CPBAmoxicilline	8.23976	23.1945	8.32849	0.999736	1	0.999759	CHEMBL1082	Au	PA	PDT/CPB	Amoxicilline	IZ mm	1	5	MBC (uM)	Pseudomonas aeruginosa	n.d	PA	Gram-	Systemic	Pseudomonas aeruginosa	MDR	Spherical	Double	Monomer	1	t	0.388	0	0.021	0.022	PAD-0.1%-	0.00780707	0.0289235	-0.143	-0.109	-0.001	-0.001
548	CuOBSN/AAmoxicilline	2.89502	9.43828	1.49051	0.9476	0.99992	0.816154	CHEMBL1082	CuO	BS	N/A	Amoxicilline	IZ mm	1	5	MBC (uM)	Bacillus subtilis	n.d	BS	Gram	NO	Bacillus sbtilis	MD	N/A	None	None	0	t	0.388	0	0.014	0.015	BSD-0.1%-	0.00694668	0.0210921	-0.147	-0.15	0	-0.002
549	CuOBSN/AAmoxicilline	0.962881	7.50614	-0.441636	0.723698	0.999451	0.391351	CHEMBL1082	CuO	BS	N/A	Amoxicilline	Ratio -	1	25.087	MBC (uM)	Bacillus subtilis	n.d	BS	Gram	NO	Bacillus sbtilis	MD	N/A	None	None	0	v	0.043	0	0.014	0.015	BSD-0.1%-	0.00694668	0.0210921	-0.147	-0.15	0	-0.002
550	CuOBSN/AAmoxicilline	2.89502	9.43828	1.49051	0.9476	0.99992	0.816154	CHEMBL1082	CuO	BS	N/A	Amoxicilline	IZ mm	1	5	MBC (uM)	Bacillus subtilis	n.d	BS	Gram	NO	Bacillus sbtilis	MD	N/A	None	None	0	t	0.388	0	0.014	0.015	BSD-0.1%-	0.00694668	0.0210921	-0.147	-0.15	0	-0.002
551	AuPAPDTAmoxicilline	3.09029	18.045	3.17902	0.95649	1	0.960037	CHEMBL1082	Au	PA	PDT	Amoxicilline	Ratio -	1	25.087	MIC (uM)	Pseudomonas aeruginosa	n.d	PA	Gram-	Systemic	Pseudomonas aeruginosa	MDR	Spherical	Single	Monomer	0	t	0.057	0	0.021	0.022	PAD-0.1%-	0.00780707	0.0289235	-0.143	-0.134	-0.001	-0.001
552	CuOPAN/AAmphotercin B	1.76969	16.7244	1.85842	0.854419	1	0.865112	CHEMBL267345	CuO	PA	N/A	Amphotercin B	IZ mm	1	5	MBC (uM)	Pseudomonas aeruginosa	MTCC 3541	PA	Gram-	Systemic	Pseudomonas aeruginosa	MD	N/A	None	None	0	t	0.388	0	0.021	0.022	PAD-0.1%-	0.00780707	0.0289235	-0.147	-0.15	0	-0.008
553	CdSECN/AAmphotericin B	4.11479	6.01012	2.22028	0.983933	0.997552	0.902056	CHEMBL267345	CdS	EC	N/A	Amphotericin B	MIC ug.mL-1	-1	50	MBC (uM)	Escherichia coli	n.d	EC	Gram-	GIT	Escherichia coli	K-12	Spherical	None	None	0	v	0.324	0	0.01	0.011	ECD-0.1%-	0.00663668	0.0167646	-0.147	-0.13	-0.001	-0.009
554	CuBSN/AAmphotericin B	1.10291	7.64617	-0.301604	0.750805	0.999522	0.425165	CHEMBL267345	Cu	BS	N/A	Amphotericin B	MIC ug.mL-1	-1	50	MBC (uM)	Bacillus subtilis	n.d	BS	Gram	NO	Bacillus subtilis	ATCC6633	Spherical	None	None	0	t	0.324	0	0.014	0.015	BSD-0.1%-	0.00694668	0.0210921	-0.147	-0.15	-0.001	-0.01
555	CdOECN/AAmphotericin B	1.4782	3.37353	-0.416308	0.814301	0.966867	0.3974	CHEMBL267345	CdO	EC	N/A	Amphotericin B	MIC ug.mL-1	-1	50	MBC (uM)	Escherichia coli	n.d	EC	Gram-	GIT	Escherichia coli	K-12	Spherical	None	None	0	v	0.324	0	0.01	0.011	ECD-0.1%-	0.00663668	0.0167646	-0.147	-0.15	-0.001	-0.009
556	AuPAPDT/GAmphotericin B	6.87261	21.8273	6.96134	0.998965	1	0.999053	CHEMBL267345	Au	PA	PDT/G	Amphotericin B	MIC nM	-1	2500	MBC (uM)	Pseudomonas aeruginosa	ATCC27853	PA	Gram-	Systemic	Pseudomonas aeruginosa	ATCC27853	Spherical	Double	Monomer	0	t	0.115	0	0.021	0.022	PAD-0.1%-	0.00780707	0.0289235	-0.144	-0.102	-0.001	-0.01
557	ZnOSCN/AAmphotericin B	0.574018	34.3884	1.12587	0.63969	1	0.755076	CHEMBL267345	ZnO	SC	N/A	Amphotericin B	MIC ug.mL-1	-1	50	MBC (uM)	Saccharomyces cerevisiae	MTCC 170	SC	Gram-	NO	Bacillus sbtilis	MD	N/A	None	None	0	t	0.324	0	0.038	0.04	SCD-0.1%-	0.00848093	0.0464827	-0.147	-0.15	0	-0.011
558	ZnOSCN/AAmphotericin B	0.906471	34.7208	1.45832	0.712277	1	0.811276	CHEMBL267345	ZnO	SC	N/A	Amphotericin B	IZ mm	1	5	MBC (uM)	Saccharomyces cerevisiae	MTCC 36	SC	Gram-	NO	Bacillus sbtilis	MD	N/A	None	None	0	t	0.388	0	0.038	0.04	SCD-0.1%-	0.00848093	0.0464827	-0.147	-0.15	0	-0.012
559	ZnOSCN/AAmphotericin B	0.859727	34.6741	1.41158	0.702604	1	0.804015	CHEMBL267345	ZnO	SC	N/A	Amphotericin B	MIC ug.mL-1	-1	50	MBC (uM)	Saccharomyces cerevisiae	n.d	SC	Gram-	NO	Bacillus sbtilis	MD	N/A	None	None	0	v	0.324	0	0.038	0.04	SCD-0.1%-	0.00848093	0.0464827	-0.147	-0.15	0	0
560	CuOSCN/AAmphotericin B	0.625965	34.4403	1.17782	0.651574	1	0.764555	CHEMBL267345	CuO	SC	N/A	Amphotericin B	MIC ug.mL-1	-1	50	MBC (uM)	Saccharomyces cerevisiae	KE744	SC	Gram-	NO	Bacillus sbtilis	MD	N/A	None	None	0	v	0.324	0	0.038	0.04	SCD-0.1%-	0.00848093	0.0464827	-0.147	-0.15	0	-0.009
561	CuOSCN/AAmphotericin B	0.932444	34.7468	1.48429	0.717571	1	0.81522	CHEMBL267345	CuO	SC	N/A	Amphotericin B	IZ mm	1	5	MBC (uM)	Saccharomyces cerevisiae	MTCC 170	SC	Gram-	NO	Bacillus sbtilis	MD	N/A	None	None	0	t	0.388	0	0.038	0.04	SCD-0.1%-	0.00848093	0.0464827	-0.147	-0.15	0	-0.011
562	CuOSCN/AAmphotericin B	-0.713988	33.1004	-0.162138	0.328718	1	0.459554	CHEMBL267345	CuO	SC	N/A	Amphotericin B	Ratio -	1	25.087	MBC (uM)	Saccharomyces cerevisiae	n.d	SC	Gram-	NO	Bacillus sbtilis	MD	N/A	None	None	0	v	0.043	0	0.038	0.04	SCD-0.1%-	0.00848093	0.0464827	-0.147	-0.15	0	0
563	CuOSCN/AAmphotericin B	0.859727	34.6741	1.41158	0.702604	1	0.804015	CHEMBL267345	CuO	SC	N/A	Amphotericin B	MIC ug.mL-1	-1	50	MBC (uM)	Saccharomyces cerevisiae	n.d	SC	Gram-	NO	Bacillus sbtilis	MD	N/A	None	None	0	t	0.324	0	0.038	0.04	SCD-0.1%-	0.00848093	0.0464827	-0.147	-0.15	0	0
564	Fe2O3SCN/AAmphotericin B	-0.440626	33.3737	0.111224	0.391592	1	0.527777	CHEMBL267345	Fe2O3	SC	N/A	Amphotericin B	MIC nM	-1	2500	MBC (uM)	Saccharomyces cerevisiae	DSY 426	SC	Gram-	NO	Bacillus sbtilis	MD	N/A	None	None	0	v	0.115	0	0.038	0.04	SCD-0.1%-	0.00848093	0.0464827	-0.147	-0.15	0	-0.005
565	Fe2O3SCN/AAmphotericin B	1.13415	34.9485	1.686	0.756603	1	0.843697	CHEMBL267345	Fe2O3	SC	N/A	Amphotericin B	MIC50 ug.mL-1	-1	21.529	MBC (uM)	Saccharomyces cerevisiae	n.d	SC	Gram-	NO	Bacillus sbtilis	MD	N/A	None	None	0	t	0.373	0	0.038	0.04	SCD-0.1%-	0.00848093	0.0464827	-0.147	-0.15	0	0
566	Fe2O3SCN/AAmphotericin B	0.859727	34.6741	1.41158	0.702604	1	0.804015	CHEMBL267345	Fe2O3	SC	N/A	Amphotericin B	MIC ug.mL-1	-1	50	MBC (uM)	Saccharomyces cerevisiae	n.d	SC	Gram-	NO	Bacillus sbtilis	MD	N/A	None	None	0	v	0.324	0	0.038	0.04	SCD-0.1%-	0.00848093	0.0464827	-0.147	-0.15	0	0
567	AgSCN/AAmphotericin B	1.81849	35.6328	2.37034	0.860385	1	0.914537	CHEMBL267345	Ag	SC	N/A	Amphotericin B	MFC ug ml-1	-1	368.513	MBC (uM)	Saccharomyces cerevisiae	n.d	SC	Gram-	NO	Bacillus subtilis	ATCC6633	Spherical	None	None	0	t	0.361	0	0.038	0.04	SCD-0.1%-	0.00848093	0.0464827	-0.147	-0.135	-0.001	0
568	AgSCN/AAmphotericin B	1.32557	35.1399	1.87742	0.790106	1	0.867314	CHEMBL267345	Ag	SC	N/A	Amphotericin B	MIC ug.mL-1	-1	50	MBC (uM)	Saccharomyces cerevisiae	NBRC10114	SC	Gram-	NO	Bacillus subtilis	ATCC6633	Spherical	None	None	0	t	0.324	0	0.038	0.04	SCD-0.1%-	0.00848093	0.0464827	-0.147	-0.135	-0.001	-0.011
569	CuOSCN/AAmphotericin B	-0.54452	33.2698	0.00732986	0.367137	1	0.501832	CHEMBL267345	CuO	SC	N/A	Amphotericin B	MIC nM	-1	2500	MBC (uM)	Saccharomyces cerevisiae	DSY 390	SC	Gram-	NO	Bacillus sbtilis	MD	N/A	None	None	0	t	0.115	0	0.038	0.04	SCD-0.1%-	0.00848093	0.0464827	-0.147	-0.15	0	-0.009
570	CuOSCN/AAmphotericin B	-0.492573	33.3218	0.0592769	0.379288	1	0.514815	CHEMBL267345	CuO	SC	N/A	Amphotericin B	MIC nM	-1	2500	MBC (uM)	Saccharomyces cerevisiae	DSY 416	SC	Gram-	NO	Bacillus sbtilis	MD	N/A	None	None	0	t	0.115	0	0.038	0.04	SCD-0.1%-	0.00848093	0.0464827	-0.147	-0.15	0	-0.007
571	CuOSCN/AAmphotericin B	-0.867316	32.947	-0.315465	0.295813	1	0.421781	CHEMBL267345	CuO	SC	N/A	Amphotericin B	FC -	1	5	MBC (uM)	Saccharomyces cerevisiae	MYH 500	SC	Gram-	NO	Bacillus sbtilis	MD	N/A	None	None	0	t	0.062	0	0.038	0.04	SCD-0.1%-	0.00848093	0.0464827	-0.147	-0.15	0	-0.01
572	CuOSCN/AAmphotericin B	0.859727	34.6741	1.41158	0.702604	1	0.804015	CHEMBL267345	CuO	SC	N/A	Amphotericin B	MIC ug.mL-1	-1	50	MBC (uM)	Saccharomyces cerevisiae	n.d	SC	Gram-	NO	Bacillus sbtilis	MD	N/A	None	None	0	t	0.324	0	0.038	0.04	SCD-0.1%-	0.00848093	0.0464827	-0.147	-0.15	0	0
573	CuSCN/AAmphotericin B	0.13681	33.9512	0.68866	0.534149	1	0.665669	CHEMBL267345	Cu	SC	N/A	Amphotericin B	IC50 nM	1	100	MBC (uM)	Saccharomyces cerevisiae	DSY 415	SC	Gram-	NO	Bacillus subtilis	ATCC6633	Spherical	None	None	0	t	0.437	0	0.038	0.04	SCD-0.1%-	0.00848093	0.0464827	-0.147	-0.15	-0.001	-0.005
574	CuSCN/AAmphotericin B	-1.6925	32.1218	-1.14064	0.155448	1	0.242202	CHEMBL267345	Cu	SC	N/A	Amphotericin B	MIC nM	-1	2500	MBC (uM)	Saccharomyces cerevisiae	DSY 417	SC	Gram-	NO	Bacillus subtilis	ATCC6633	Spherical	None	None	0	t	0.115	0	0.038	0.04	SCD-0.1%-	0.00848093	0.0464827	-0.147	-0.15	-0.001	-0.006
575	CuSCN/AAmphotericin B	-0.0917484	33.7226	0.460102	0.477079	1	0.613038	CHEMBL267345	Cu	SC	N/A	Amphotericin B	MIC100 uM	-1	13.895	MBC (uM)	Saccharomyces cerevisiae	n.d	SC	Gram-	NO	Bacillus subtilis	ATCC6633	Spherical	None	None	0	t	0.373	0	0.038	0.04	SCD-0.1%-	0.00848093	0.0464827	-0.147	-0.15	-0.001	0
576	CuSCN/AAmphotericin B	-0.237359	33.577	0.314491	0.440937	1	0.577981	CHEMBL267345	Cu	SC	N/A	Amphotericin B	IC12 ug ml-1	-1	494.246	MBC (uM)	Saccharomyces cerevisiae	n.d	SC	Gram-	NO	Bacillus subtilis	ATCC6633	Spherical	None	None	0	t	0.347	0	0.038	0.04	SCD-0.1%-	0.00848093	0.0464827	-0.147	-0.15	-0.001	0
577	CuOSCN/AAmphotericin B	1.36271	35.177	1.91456	0.796199	1	0.87153	CHEMBL267345	CuO	SC	N/A	Amphotericin B	IC50 nM	1	100	MBC (uM)	Saccharomyces cerevisiae	DSY 426	SC	Gram-	NO	Bacillus sbtilis	MD	N/A	None	None	0	v	0.437	0	0.038	0.04	SCD-0.1%-	0.00848093	0.0464827	-0.147	-0.15	0	-0.005
578	CuOSCN/AAmphotericin B	0.574018	34.3884	1.12587	0.63969	1	0.755076	CHEMBL267345	CuO	SC	N/A	Amphotericin B	MIC ug.mL-1	-1	50	MBC (uM)	Saccharomyces cerevisiae	MTCC 170	SC	Gram-	NO	Bacillus sbtilis	MD	N/A	None	None	0	t	0.324	0	0.038	0.04	SCD-0.1%-	0.00848093	0.0464827	-0.147	-0.15	0	-0.011
579	CuOSCN/AAmphotericin B	-0.867316	32.947	-0.315465	0.295813	1	0.421781	CHEMBL267345	CuO	SC	N/A	Amphotericin B	FC -	1	5	MBC (uM)	Saccharomyces cerevisiae	MYH 500	SC	Gram-	NO	Bacillus sbtilis	MD	N/A	None	None	0	t	0.062	0	0.038	0.04	SCD-0.1%-	0.00848093	0.0464827	-0.147	-0.15	0	-0.01
580	CuISCN/AAmphotericin B	1.87178	35.6861	2.42363	0.866665	1	0.918612	CHEMBL267345	CuI	SC	N/A	Amphotericin B	IC12 ug ml-1	-1	494.246	MBC (uM)	Saccharomyces cerevisiae	n.d	SC	Gram-	NO	Bacillus subtilis	ATCC6633	N/A	None	None	0	t	0.347	0	0.038	0.04	SCD-0.1%-	0.00848093	0.0464827	-0.143	-0.15	-0.001	0
581	CuOSCN/AAmphotericin B	1.25881	35.0732	1.81066	0.778821	1	0.859442	CHEMBL267345	CuO	SC	N/A	Amphotericin B	IC50 nM	1	100	MBC (uM)	Saccharomyces cerevisiae	DSY 390	SC	Gram-	NO	Bacillus sbtilis	MD	N/A	None	None	0	t	0.437	0	0.038	0.04	SCD-0.1%-	0.00848093	0.0464827	-0.147	-0.15	0	-0.009
582	CuOSCN/AAmphotericin B	1.31076	35.1251	1.86261	0.78764	1	0.865601	CHEMBL267345	CuO	SC	N/A	Amphotericin B	IC50 nM	1	100	MBC (uM)	Saccharomyces cerevisiae	DSY 416	SC	Gram-	NO	Bacillus sbtilis	MD	N/A	None	None	0	v	0.437	0	0.038	0.04	SCD-0.1%-	0.00848093	0.0464827	-0.147	-0.15	0	-0.007
583	CuOSCN/AAmphotericin B	1.14429	34.9586	1.69614	0.758466	1	0.84503	CHEMBL267345	CuO	SC	N/A	Amphotericin B	FICI -	-1	1.668	MBC (uM)	Saccharomyces cerevisiae	DSY 426	SC	Gram-	NO	Bacillus sbtilis	MD	N/A	None	None	0	t	0.398	0	0.038	0.04	SCD-0.1%-	0.00848093	0.0464827	-0.147	-0.15	0	-0.005
584	CuOSCN/AAmphotericin B	0.932444	34.7468	1.48429	0.717571	1	0.81522	CHEMBL267345	CuO	SC	N/A	Amphotericin B	IZ mm	1	5	MBC (uM)	Saccharomyces cerevisiae	MTCC 170	SC	Gram-	NO	Bacillus sbtilis	MD	N/A	None	None	0	t	0.388	0	0.038	0.04	SCD-0.1%-	0.00848093	0.0464827	-0.147	-0.15	0	-0.011
585	CuOSCN/AAmphotericin B	0.859727	34.6741	1.41158	0.702604	1	0.804015	CHEMBL267345	CuO	SC	N/A	Amphotericin B	MIC ug.mL-1	-1	50	MBC (uM)	Saccharomyces cerevisiae	n.d	SC	Gram-	NO	Bacillus sbtilis	MD	N/A	None	None	0	t	0.324	0	0.038	0.04	SCD-0.1%-	0.00848093	0.0464827	-0.147	-0.15	0	0
586	CuOSCN/AAmphotericin B	0.859727	34.6741	1.41158	0.702604	1	0.804015	CHEMBL267345	CuO	SC	N/A	Amphotericin B	MIC ug.mL-1	-1	50	MBC (uM)	Saccharomyces cerevisiae	n.d	SC	Gram-	NO	Bacillus sbtilis	MD	N/A	None	None	0	v	0.324	0	0.038	0.04	SCD-0.1%-	0.00848093	0.0464827	-0.147	-0.15	0	0
587	CuOSCN/AAmphotericin B	0.984391	34.7987	1.53624	0.727979	1	0.822918	CHEMBL267345	CuO	SC	N/A	Amphotericin B	IZ mm	1	5	MBC (uM)	Saccharomyces cerevisiae	ATCC9763	SC	Gram-	NO	Bacillus sbtilis	MD	N/A	None	None	0	t	0.388	0	0.038	0.04	SCD-0.1%-	0.00848093	0.0464827	-0.147	-0.15	0	-0.009
588	CuOSCN/AAmphotericin B	1.0404	34.8547	1.59225	0.738926	1	0.830932	CHEMBL267345	CuO	SC	N/A	Amphotericin B	FICI -	-1	1.668	MBC (uM)	Saccharomyces cerevisiae	DSY 390	SC	Gram-	NO	Bacillus sbtilis	MD	N/A	None	None	0	t	0.398	0	0.038	0.04	SCD-0.1%-	0.00848093	0.0464827	-0.147	-0.15	0	-0.009
589	CuOSCN/AAmphotericin B	0.859727	34.6741	1.41158	0.702604	1	0.804015	CHEMBL267345	CuO	SC	N/A	Amphotericin B	MIC ug.mL-1	-1	50	MBC (uM)	Saccharomyces cerevisiae	n.d	SC	Gram-	NO	Bacillus sbtilis	MD	N/A	None	None	0	v	0.324	0	0.038	0.04	SCD-0.1%-	0.00848093	0.0464827	-0.147	-0.15	0	0
590	CuOSCN/AAmphotericin B	0.859727	34.6741	1.41158	0.702604	1	0.804015	CHEMBL267345	CuO	SC	N/A	Amphotericin B	MIC ug.mL-1	-1	50	MBC (uM)	Saccharomyces cerevisiae	n.d	SC	Gram-	NO	Bacillus sbtilis	MD	N/A	None	None	0	t	0.324	0	0.038	0.04	SCD-0.1%-	0.00848093	0.0464827	-0.147	-0.15	0	0
591	CuOSCN/AAmphotericin B	0.574018	34.3884	1.12587	0.63969	1	0.755076	CHEMBL267345	CuO	SC	N/A	Amphotericin B	MIC ug.mL-1	-1	50	MBC (uM)	Saccharomyces cerevisiae	X2180-1A	SC	Gram-	NO	Bacillus sbtilis	MD	N/A	None	None	0	t	0.324	0	0.038	0.04	SCD-0.1%-	0.00848093	0.0464827	-0.147	-0.15	0	-0.011
592	CuSCN/AAmphotericin B	-0.0398891	33.7745	0.511961	0.490029	1	0.625266	CHEMBL267345	Cu	SC	N/A	Amphotericin B	MIC ug.mL-1	-1	50	MIC (uM)	Saccharomyces cerevisiae	ATCC24657	SC	Gram-	NO	Bacillus subtilis	ATCC6633	Spherical	None	None	0	t	0.424	0	0.038	0.04	SCD-0.1%-	0.00848093	0.0464827	-0.147	-0.15	-0.001	-0.009
593	CuSCN/AAmphotericin B	0.234531	34.0489	0.786381	0.558365	1	0.687054	CHEMBL267345	Cu	SC	N/A	Amphotericin B	MFC ug ml-1	-1	368.513	MIC (uM)	Saccharomyces cerevisiae	ATCC24657	SC	Gram-	NO	Bacillus subtilis	ATCC6633	Spherical	None	None	0	v	0.473	0	0.038	0.04	SCD-0.1%-	0.00848093	0.0464827	-0.147	-0.15	-0.001	-0.009
594	CuSCN/AAmphotericin B	0.866892	34.6812	1.41874	0.704099	1	0.805141	CHEMBL267345	Cu	SC	N/A	Amphotericin B	IC50 nM	1	100	MIC (uM)	Saccharomyces cerevisiae	DSY 417	SC	Gram-	NO	Bacillus subtilis	ATCC6633	Spherical	None	None	0	t	0.572	0	0.038	0.04	SCD-0.1%-	0.00848093	0.0464827	-0.147	-0.15	-0.001	-0.006
595	CuSCN/AAmphotericin B	0.347024	34.1614	0.898875	0.585896	1	0.710718	CHEMBL267345	Cu	SC	N/A	Amphotericin B	IZ mm	1	5	MIC (uM)	Saccharomyces cerevisiae	MTCC 36	SC	Gram-	NO	Bacillus subtilis	ATCC6633	Spherical	None	None	0	t	0.507	0	0.038	0.04	SCD-0.1%-	0.00848093	0.0464827	-0.147	-0.15	-0.001	-0.012
596	CuSCN/AAmphotericin B	0.193872	34.0082	0.745723	0.548317	1	0.678246	CHEMBL267345	Cu	SC	N/A	Amphotericin B	MIC ug.mL-1	-1	50	MIC (uM)	Saccharomyces cerevisiae	n.d	SC	Gram-	NO	Bacillus subtilis	ATCC6633	Spherical	None	None	0	t	0.424	0	0.038	0.04	SCD-0.1%-	0.00848093	0.0464827	-0.147	-0.15	-0.001	0
597	CuSCN/AAmphotericin B	0.361885	34.1762	0.913735	0.589497	1	0.713764	CHEMBL267345	Cu	SC	N/A	Amphotericin B	IC12 ug ml-1	-1	494.246	MIC (uM)	Saccharomyces cerevisiae	n.d	SC	Gram-	NO	Bacillus subtilis	ATCC6633	Spherical	None	None	0	t	0.454	0	0.038	0.04	SCD-0.1%-	0.00848093	0.0464827	-0.147	-0.15	-0.001	0
598	AgSCN/AAmphotericin B	2.55871	36.3731	3.11056	0.928157	1	0.957326	CHEMBL267345	Ag	SC	N/A	Amphotericin B	FICI -	-1	1.668	MIC (uM)	Saccharomyces cerevisiae	DSY 417	SC	Gram-	NO	Bacillus subtilis	ATCC6633	Spherical	None	None	0	t	0.521	0	0.038	0.04	SCD-0.1%-	0.00848093	0.0464827	-0.147	-0.135	-0.001	-0.006
599	AgSCN/AAmphotericin B	2.17132	35.9857	2.72317	0.897644	1	0.93838	CHEMBL267345	Ag	SC	N/A	Amphotericin B	MIC ug.mL-1	-1	50	MIC (uM)	Saccharomyces cerevisiae	n.d	SC	Gram-	NO	Bacillus subtilis	ATCC6633	Spherical	None	None	0	t	0.424	0	0.038	0.04	SCD-0.1%-	0.00848093	0.0464827	-0.147	-0.135	-0.001	0
600	CuOSCN/AAmphotericin B	1.18601	35.0003	1.73786	0.766026	1	0.850415	CHEMBL267345	CuO	SC	N/A	Amphotericin B	MIC ug.mL-1	-1	50	MIC (uM)	Saccharomyces cerevisiae	ATCC9763	SC	Gram-	NO	Bacillus sbtilis	MD	N/A	None	None	0	t	0.424	0	0.038	0.04	SCD-0.1%-	0.00848093	0.0464827	-0.147	-0.15	0	-0.009
601	CuOSCN/AAmphotericin B	1.65084	35.4652	2.20269	0.839005	1	0.900491	CHEMBL267345	CuO	SC	N/A	Amphotericin B	IZ mm	1	5	MIC (uM)	Saccharomyces cerevisiae	ATCC9763	SC	Gram-	NO	Bacillus sbtilis	MD	N/A	None	None	0	v	0.507	0	0.038	0.04	SCD-0.1%-	0.00848093	0.0464827	-0.147	-0.15	0	-0.009
602	CuOSCN/AAmphotericin B	1.13406	34.9484	1.68591	0.756587	1	0.843685	CHEMBL267345	CuO	SC	N/A	Amphotericin B	MIC ug.mL-1	-1	50	MIC (uM)	Saccharomyces cerevisiae	X2180-1A	SC	Gram-	NO	Bacillus sbtilis	MD	N/A	None	None	0	v	0.424	0	0.038	0.04	SCD-0.1%-	0.00848093	0.0464827	-0.147	-0.15	0	-0.011
603	CuOSCN/AAmphotericin B	1.18601	35.0003	1.73786	0.766026	1	0.850415	CHEMBL267345	CuO	SC	N/A	Amphotericin B	MIC ug.mL-1	-1	50	MIC (uM)	Saccharomyces cerevisiae	ATCC9763	SC	Gram-	NO	Bacillus sbtilis	MD	N/A	None	None	0	t	0.424	0	0.038	0.04	SCD-0.1%-	0.00848093	0.0464827	-0.147	-0.15	0	-0.009
604	CuOSCN/AAmphotericin B	1.78119	35.5955	2.33304	0.855844	1	0.911577	CHEMBL267345	CuO	SC	N/A	Amphotericin B	FICI -	-1	1.668	MIC (uM)	Saccharomyces cerevisiae	DSY 416	SC	Gram-	NO	Bacillus sbtilis	MD	N/A	None	None	0	t	0.521	0	0.038	0.04	SCD-0.1%-	0.00848093	0.0464827	-0.147	-0.15	0	-0.007
605	CuISCN/AAmphotericin B	2.34367	36.158	2.89553	0.91243	1	0.947625	CHEMBL267345	CuI	SC	N/A	Amphotericin B	MFC ug ml-1	-1	368.513	MIC (uM)	Saccharomyces cerevisiae	ATCC9763	SC	Gram-	NO	Bacillus subtilis	ATCC6633	N/A	None	None	0	v	0.473	0	0.038	0.04	SCD-0.1%-	0.00848093	0.0464827	-0.143	-0.15	-0.001	-0.009
606	CuISCN/AAmphotericin B	2.71639	36.5307	3.26824	0.937987	1	0.963323	CHEMBL267345	CuI	SC	N/A	Amphotericin B	FICI -	-1	1.668	MIC (uM)	Saccharomyces cerevisiae	DSY 415	SC	Gram-	NO	Bacillus subtilis	ATCC6633	N/A	None	None	0	t	0.521	0	0.038	0.04	SCD-0.1%-	0.00848093	0.0464827	-0.143	-0.15	-0.001	-0.005
607	CuISCN/AAmphotericin B	2.30302	36.1174	2.85487	0.909127	1	0.94557	CHEMBL267345	CuI	SC	N/A	Amphotericin B	MIC ug.mL-1	-1	50	MIC (uM)	Saccharomyces cerevisiae	n.d	SC	Gram-	NO	Bacillus subtilis	ATCC6633	N/A	None	None	0	t	0.424	0	0.038	0.04	SCD-0.1%-	0.00848093	0.0464827	-0.143	-0.15	-0.001	0
608	CuOSCN/AAmphotericin B	1.18601	35.0003	1.73786	0.766026	1	0.850415	CHEMBL267345	CuO	SC	N/A	Amphotericin B	MIC ug.mL-1	-1	50	MIC (uM)	Saccharomyces cerevisiae	ATCC9763	SC	Gram-	NO	Bacillus sbtilis	MD	N/A	None	None	0	t	0.424	0	0.038	0.04	SCD-0.1%-	0.00848093	0.0464827	-0.147	-0.15	0	-0.009
609	CuOSCN/AAmphotericin B	-1.17177	32.6426	-0.619916	0.236536	1	0.349801	CHEMBL267345	CuO	SC	N/A	Amphotericin B	IC50 ug.mL-1	1	2000	MIC (uM)	Saccharomyces cerevisiae	ATCC9763	SC	Gram-	NO	Bacillus sbtilis	MD	N/A	None	None	0	t	0.003	0	0.038	0.04	SCD-0.1%-	0.00848093	0.0464827	-0.147	-0.15	0	-0.009
610	CuOSCN/AAmphotericin B	-0.239012	33.5753	0.312839	0.44053	1	0.577578	CHEMBL267345	CuO	SC	N/A	Amphotericin B	MIC nM	-1	2500	MIC (uM)	Saccharomyces cerevisiae	DSY 415	SC	Gram-	NO	Bacillus sbtilis	MD	N/A	None	None	0	t	0.151	0	0.038	0.04	SCD-0.1%-	0.00848093	0.0464827	-0.147	-0.15	0	-0.005
611	CuOSCN/AAmphotericin B	1.16003	34.9744	1.71188	0.761339	1	0.84708	CHEMBL267345	CuO	SC	N/A	Amphotericin B	MIC ug.mL-1	-1	50	MIC (uM)	Saccharomyces cerevisiae	KE743	SC	Gram-	NO	Bacillus sbtilis	MD	N/A	None	None	0	v	0.424	0	0.038	0.04	SCD-0.1%-	0.00848093	0.0464827	-0.147	-0.15	0	-0.01
612	CuOSCN/AAmphotericin B	1.57658	35.3909	2.12843	0.828719	1	0.893636	CHEMBL267345	CuO	SC	N/A	Amphotericin B	MIC90 ug.mL-1	-1	34.891	MIC (uM)	Saccharomyces cerevisiae	n.d	SC	Gram-	NO	Bacillus sbtilis	MD	N/A	None	None	0	t	0.452	0	0.038	0.04	SCD-0.1%-	0.00848093	0.0464827	-0.147	-0.15	0	0
613	CuOSTN/AAmphotericin B	1.93684	73.092	-2.02065	0.874004	1	0.117052	CHEMBL267345	CuO	ST	N/A	Amphotericin B	MIC ug.mL-1	-1	50	MBC (uM)	Streptococcus pyogenes	n.d	ST	Gram	Respiratory	Staphylococcus aureus	MD	N/A	None	None	0	t	0.324	0	0.074	0.075	STD-0.1%-	0.00734064	0.0812488	-0.147	-0.15	0	-0.008
614	CuOSCN/AAmphotericinB	0.548045	34.3624	1.09989	0.633682	1	0.75024	CHEMBL267345	CuO	SC	N/A	AmphotericinB	MIC ug.mL-1	-1	50	MBC (uM)	Saccharomyces cerevisiae	DSMZ 1333	SC	Gram-	NO	Bacillus sbtilis	MD	N/A	None	None	0	t	0.324	0	0.038	0.04	SCD-0.1%-	0.00848093	0.0464827	-0.147	-0.15	0	-0.012
615	CuOSCN/AAmphotericin-B	0.574018	34.3884	1.12587	0.63969	1	0.755076	CHEMBL267345	CuO	SC	N/A	Amphotericin-B	MIC ug.mL-1	-1	50	MBC (uM)	Saccharomyces cerevisiae	MTCC 170	SC	Gram-	NO	Bacillus sbtilis	MD	N/A	None	None	0	t	0.324	0	0.038	0.04	SCD-0.1%-	0.00848093	0.0464827	-0.147	-0.15	0	-0.011
616	CuOSCN/AAmphotericin-B	0.906471	34.7208	1.45832	0.712277	1	0.811276	CHEMBL267345	CuO	SC	N/A	Amphotericin-B	IZ mm	1	5	MBC (uM)	Saccharomyces cerevisiae	MTCC 36	SC	Gram-	NO	Bacillus sbtilis	MD	N/A	None	None	0	t	0.388	0	0.038	0.04	SCD-0.1%-	0.00848093	0.0464827	-0.147	-0.15	0	-0.012
617	Fe2O3SCN/AAmphotericin-B	0.574018	34.3884	1.12587	0.63969	1	0.755076	CHEMBL267345	Fe2O3	SC	N/A	Amphotericin-B	MIC ug.mL-1	-1	50	MBC (uM)	Saccharomyces cerevisiae	MTCC 170	SC	Gram-	NO	Bacillus sbtilis	MD	N/A	None	None	0	t	0.324	0	0.038	0.04	SCD-0.1%-	0.00848093	0.0464827	-0.147	-0.15	0	-0.011
618	Fe2O3SCN/AAmphotericin-B	0.932444	34.7468	1.48429	0.717571	1	0.81522	CHEMBL267345	Fe2O3	SC	N/A	Amphotericin-B	IZ mm	1	5	MBC (uM)	Saccharomyces cerevisiae	MTCC 170	SC	Gram-	NO	Bacillus sbtilis	MD	N/A	None	None	0	t	0.388	0	0.038	0.04	SCD-0.1%-	0.00848093	0.0464827	-0.147	-0.15	0	-0.011
619	AgSCN/AAmphotericin-B	1.9697	35.784	2.52155	0.877579	1	0.925639	CHEMBL267345	Ag	SC	N/A	Amphotericin-B	IZ mm	1	5	MBC (uM)	Saccharomyces cerevisiae	n.d	SC	Gram-	NO	Bacillus subtilis	ATCC6633	Spherical	None	None	0	t	0.388	0	0.038	0.04	SCD-0.1%-	0.00848093	0.0464827	-0.147	-0.135	-0.001	0
620	CuOSCN/AAmphotericin-B	0.574018	34.3884	1.12587	0.63969	1	0.755076	CHEMBL267345	CuO	SC	N/A	Amphotericin-B	MIC ug.mL-1	-1	50	MBC (uM)	Saccharomyces cerevisiae	MTCC 170	SC	Gram-	NO	Bacillus sbtilis	MD	N/A	None	None	0	t	0.324	0	0.038	0.04	SCD-0.1%-	0.00848093	0.0464827	-0.147	-0.15	0	-0.011
621	CuOSCN/AAmphotericin-B	0.932444	34.7468	1.48429	0.717571	1	0.81522	CHEMBL267345	CuO	SC	N/A	Amphotericin-B	IZ mm	1	5	MBC (uM)	Saccharomyces cerevisiae	MTCC 170	SC	Gram-	NO	Bacillus sbtilis	MD	N/A	None	None	0	v	0.388	0	0.038	0.04	SCD-0.1%-	0.00848093	0.0464827	-0.147	-0.15	0	-0.011
622	CuSCN/AAmphotericin-B	-0.319424	33.4949	0.232426	0.420816	1	0.557846	CHEMBL267345	Cu	SC	N/A	Amphotericin-B	IZ mm	1	5	MBC (uM)	Saccharomyces cerevisiae	MTCC 36	SC	Gram-	NO	Bacillus subtilis	ATCC6633	Spherical	None	None	0	v	0.388	0	0.038	0.04	SCD-0.1%-	0.00848093	0.0464827	-0.147	-0.15	-0.001	-0.012
623	CuSCN/AAmphotericin-B	-0.00774231	33.8066	0.544108	0.498064	1	0.632768	CHEMBL267345	Cu	SC	N/A	Amphotericin-B	IZ mm	1	5	MBC (uM)	Saccharomyces cerevisiae	n.d	SC	Gram-	NO	Bacillus subtilis	ATCC6633	Spherical	None	None	0	t	0.388	0	0.038	0.04	SCD-0.1%-	0.00848093	0.0464827	-0.147	-0.15	-0.001	0
624	CuSCN/AAmphotericin-B	-0.651877	33.1625	-0.100027	0.342567	1	0.475014	CHEMBL267345	Cu	SC	N/A	Amphotericin-B	MIC ug.mL-1	-1	50	MBC (uM)	Saccharomyces cerevisiae	NICM 3312	SC	Gram-	NO	Bacillus subtilis	ATCC6633	Spherical	None	None	0	t	0.324	0	0.038	0.04	SCD-0.1%-	0.00848093	0.0464827	-0.147	-0.15	-0.001	-0.011
625	CuOSCN/AAmphotericin-B	0.932444	34.7468	1.48429	0.717571	1	0.81522	CHEMBL267345	CuO	SC	N/A	Amphotericin-B	IZ mm	1	5	MBC (uM)	Saccharomyces cerevisiae	MTCC 170	SC	Gram-	NO	Bacillus sbtilis	MD	N/A	None	None	0	t	0.388	0	0.038	0.04	SCD-0.1%-	0.00848093	0.0464827	-0.147	-0.15	0	-0.011
626	AgSCN/AAmphotericin-B	2.32447	36.1388	2.87632	0.910883	1	0.946663	CHEMBL267345	Ag	SC	N/A	Amphotericin-B	IZ mm	1	5	MIC (uM)	Saccharomyces cerevisiae	MTCC 36	SC	Gram-	NO	Bacillus subtilis	ATCC6633	Spherical	None	None	0	v	0.507	0	0.038	0.04	SCD-0.1%-	0.00848093	0.0464827	-0.147	-0.135	-0.001	-0.012
627	CuISCN/AAmphotericin-B	2.45617	36.2705	3.00802	0.921011	1	0.952935	CHEMBL267345	CuI	SC	N/A	Amphotericin-B	IZ mm	1	5	MIC (uM)	Saccharomyces cerevisiae	MTCC 36	SC	Gram-	NO	Bacillus subtilis	ATCC6633	N/A	None	None	0	v	0.507	0	0.038	0.04	SCD-0.1%-	0.00848093	0.0464827	-0.143	-0.15	-0.001	-0.012
628	CuOSCN/AAmphoterin-B	1.41977	35.2341	1.97162	0.805302	1	0.877785	CHEMBL267345	CuO	SC	N/A	Amphoterin-B	MIC ug.mL-1	-1	50	MIC (uM)	Saccharomyces cerevisiae	n.d	SC	Gram-	NO	Bacillus sbtilis	MD	N/A	None	None	0	t	0.424	0	0.038	0.04	SCD-0.1%-	0.00848093	0.0464827	-0.147	-0.15	0	0
629	ZnOBSN/AAmpicillin	2.56257	9.10583	1.15805	0.928413	0.999889	0.760979	CHEMBL174	ZnO	BS	N/A	Ampicillin	MIC ug.mL-1	-1	50	MBC (uM)	Bacillus subtilis	ATCC11774	BS	Gram	NO	Bacillus sbtilis	MD	N/A	None	None	0	t	0.324	0	0.014	0.015	BSD-0.1%-	0.00694668	0.0210921	-0.147	-0.15	0	-0.001
630	ZnOBSN/AAmpicillin	2.56257	9.10583	1.15805	0.928413	0.999889	0.760979	CHEMBL174	ZnO	BS	N/A	Ampicillin	MIC ug.mL-1	-1	50	MBC (uM)	Bacillus subtilis	ATCC6633	BS	Gram	NO	Bacillus sbtilis	MD	N/A	None	None	0	v	0.324	0	0.014	0.015	BSD-0.1%-	0.00694668	0.0210921	-0.147	-0.15	0	-0.001
631	ZnOBSN/AAmpicillin	2.56257	9.10583	1.15805	0.928413	0.999889	0.760979	CHEMBL174	ZnO	BS	N/A	Ampicillin	MIC ug.mL-1	-1	50	MBC (uM)	Bacillus subtilis	ATCC6633	BS	Gram	NO	Bacillus sbtilis	MD	N/A	None	None	0	t	0.324	0	0.014	0.015	BSD-0.1%-	0.00694668	0.0210921	-0.147	-0.15	0	-0.001
632	ZnOBSN/AAmpicillin	2.56257	9.10583	1.15805	0.928413	0.999889	0.760979	CHEMBL174	ZnO	BS	N/A	Ampicillin	MIC ug.mL-1	-1	50	MBC (uM)	Bacillus subtilis	MTCC 121	BS	Gram	NO	Bacillus sbtilis	MD	N/A	None	None	0	t	0.324	0	0.014	0.015	BSD-0.1%-	0.00694668	0.0210921	-0.147	-0.15	0	-0.001
633	ZnOBSN/AAmpicillin	2.22094	8.7642	0.816428	0.902115	0.999844	0.693478	CHEMBL174	ZnO	BS	N/A	Ampicillin	MIC99 ug ml-1	-1	161.696	MBC (uM)	Bacillus subtilis	MTCC 441	BS	Gram	NO	Bacillus sbtilis	MD	N/A	None	None	0	t	0.263	0	0.014	0.015	BSD-0.1%-	0.00694668	0.0210921	-0.147	-0.15	0	-0.001
634	ZnOBSN/AAmpicillin	2.56257	9.10583	1.15805	0.928413	0.999889	0.760979	CHEMBL174	ZnO	BS	N/A	Ampicillin	MIC ug.mL-1	-1	50	MBC (uM)	Bacillus subtilis	MTCC 441	BS	Gram	NO	Bacillus sbtilis	MD	N/A	None	None	0	v	0.324	0	0.014	0.015	BSD-0.1%-	0.00694668	0.0210921	-0.147	-0.15	0	-0.001
635	ZnOBSN/AAmpicillin	2.56257	9.10583	1.15805	0.928413	0.999889	0.760979	CHEMBL174	ZnO	BS	N/A	Ampicillin	MIC ug.mL-1	-1	50	MBC (uM)	Bacillus subtilis	n.d	BS	Gram	NO	Bacillus sbtilis	MD	N/A	None	None	0	t	0.324	0	0.014	0.015	BSD-0.1%-	0.00694668	0.0210921	-0.147	-0.15	0	-0.001
636	ZnOBSN/AAmpicillin	2.56257	9.10583	1.15805	0.928413	0.999889	0.760979	CHEMBL174	ZnO	BS	N/A	Ampicillin	MIC ug.mL-1	-1	50	MBC (uM)	Bacillus subtilis	n.d	BS	Gram	NO	Bacillus sbtilis	MD	N/A	None	None	0	t	0.324	0	0.014	0.015	BSD-0.1%-	0.00694668	0.0210921	-0.147	-0.15	0	-0.001
637	ZnOBSN/AAmpicillin	2.921	9.46425	1.51648	0.948875	0.999922	0.820019	CHEMBL174	ZnO	BS	N/A	Ampicillin	IZ mm	1	5	MBC (uM)	Bacillus subtilis	n.d	BS	Gram	NO	Bacillus sbtilis	MD	N/A	None	None	0	v	0.388	0	0.014	0.015	BSD-0.1%-	0.00694668	0.0210921	-0.147	-0.15	0	-0.001
638	ZnOBSN/AAmpicillin	1.36611	7.90937	-0.0384063	0.796751	0.999633	0.4904	CHEMBL174	ZnO	BS	N/A	Ampicillin	MIC nM	-1	2500	MBC (uM)	Bacillus subtilis	NCIM 2718	BS	Gram	NO	Bacillus sbtilis	MD	N/A	None	None	0	t	0.115	0	0.014	0.015	BSD-0.1%-	0.00694668	0.0210921	-0.147	-0.15	0	-0.002
639	CuOBSN/AAmpicillin	2.56257	9.10583	1.15805	0.928413	0.999889	0.760979	CHEMBL174	CuO	BS	N/A	Ampicillin	MIC ug.mL-1	-1	50	MBC (uM)	Bacillus subtilis	ATCC6633	BS	Gram	NO	Bacillus sbtilis	MD	N/A	None	None	0	v	0.324	0	0.014	0.015	BSD-0.1%-	0.00694668	0.0210921	-0.147	-0.15	0	-0.001
640	CuOBSN/AAmpicillin	2.56257	9.10583	1.15805	0.928413	0.999889	0.760979	CHEMBL174	CuO	BS	N/A	Ampicillin	MIC ug.mL-1	-1	50	MBC (uM)	Bacillus subtilis	MTCC 121	BS	Gram	NO	Bacillus sbtilis	MD	N/A	None	None	0	t	0.324	0	0.014	0.015	BSD-0.1%-	0.00694668	0.0210921	-0.147	-0.15	0	-0.001
641	CuOBSN/AAmpicillin	2.22094	8.7642	0.816428	0.902115	0.999844	0.693478	CHEMBL174	CuO	BS	N/A	Ampicillin	MIC99 ug ml-1	-1	161.696	MBC (uM)	Bacillus subtilis	MTCC 441	BS	Gram	NO	Bacillus sbtilis	MD	N/A	None	None	0	t	0.263	0	0.014	0.015	BSD-0.1%-	0.00694668	0.0210921	-0.147	-0.15	0	-0.001
642	CuOBSN/AAmpicillin	2.56257	9.10583	1.15805	0.928413	0.999889	0.760979	CHEMBL174	CuO	BS	N/A	Ampicillin	MIC ug.mL-1	-1	50	MBC (uM)	Bacillus subtilis	MTCC 441	BS	Gram	NO	Bacillus sbtilis	MD	N/A	None	None	0	v	0.324	0	0.014	0.015	BSD-0.1%-	0.00694668	0.0210921	-0.147	-0.15	0	-0.001
643	CuOBSN/AAmpicillin	2.56257	9.10583	1.15805	0.928413	0.999889	0.760979	CHEMBL174	CuO	BS	N/A	Ampicillin	MIC ug.mL-1	-1	50	MBC (uM)	Bacillus subtilis	n.d	BS	Gram	NO	Bacillus sbtilis	MD	N/A	None	None	0	t	0.324	0	0.014	0.015	BSD-0.1%-	0.00694668	0.0210921	-0.147	-0.15	0	-0.001
644	CuOBSN/AAmpicillin	2.921	9.46425	1.51648	0.948875	0.999922	0.820019	CHEMBL174	CuO	BS	N/A	Ampicillin	IZ mm	1	5	MBC (uM)	Bacillus subtilis	n.d	BS	Gram	NO	Bacillus sbtilis	MD	N/A	None	None	0	v	0.388	0	0.014	0.015	BSD-0.1%-	0.00694668	0.0210921	-0.147	-0.15	0	-0.001
645	CuOBSN/AAmpicillin	2.921	9.46425	1.51648	0.948875	0.999922	0.820019	CHEMBL174	CuO	BS	N/A	Ampicillin	IZ mm	1	5	MBC (uM)	Bacillus subtilis	n.d	BS	Gram	NO	Bacillus sbtilis	MD	N/A	None	None	0	t	0.388	0	0.014	0.015	BSD-0.1%-	0.00694668	0.0210921	-0.147	-0.15	0	-0.001
646	CuOBSN/AAmpicillin	2.5366	9.07985	1.13208	0.926668	0.999886	0.756222	CHEMBL174	CuO	BS	N/A	Ampicillin	MIC ug.mL-1	-1	50	MBC (uM)	Bacillus subtilis	UFPEDA 16	BS	Gram	NO	Bacillus sbtilis	MD	N/A	None	None	0	t	0.324	0	0.014	0.015	BSD-0.1%-	0.00694668	0.0210921	-0.147	-0.15	0	-0.002
647	Fe2O3BSN/AAmpicillin	2.56257	9.10583	1.15805	0.928413	0.999889	0.760979	CHEMBL174	Fe2O3	BS	N/A	Ampicillin	MIC ug.mL-1	-1	50	MBC (uM)	Bacillus subtilis	ATCC6633	BS	Gram	NO	Bacillus sbtilis	MD	N/A	None	None	0	t	0.324	0	0.014	0.015	BSD-0.1%-	0.00694668	0.0210921	-0.147	-0.15	0	-0.001
648	Fe2O3BSN/AAmpicillin	2.56257	9.10583	1.15805	0.928413	0.999889	0.760979	CHEMBL174	Fe2O3	BS	N/A	Ampicillin	MIC ug.mL-1	-1	50	MBC (uM)	Bacillus subtilis	ATCC6633	BS	Gram	NO	Bacillus sbtilis	MD	N/A	None	None	0	v	0.324	0	0.014	0.015	BSD-0.1%-	0.00694668	0.0210921	-0.147	-0.15	0	-0.001
649	Fe2O3BSN/AAmpicillin	2.921	9.46425	1.51648	0.948875	0.999922	0.820019	CHEMBL174	Fe2O3	BS	N/A	Ampicillin	IZ mm	1	5	MBC (uM)	Bacillus subtilis	ATCC6633	BS	Gram	NO	Bacillus sbtilis	MD	N/A	None	None	0	t	0.388	0	0.014	0.015	BSD-0.1%-	0.00694668	0.0210921	-0.147	-0.15	0	-0.001
650	Fe2O3BSN/AAmpicillin	2.5366	9.07985	1.13208	0.926668	0.999886	0.756222	CHEMBL174	Fe2O3	BS	N/A	Ampicillin	MIC ug.mL-1	-1	50	MBC (uM)	Bacillus subtilis	ATCC6638	BS	Gram	NO	Bacillus sbtilis	MD	N/A	None	None	0	t	0.324	0	0.014	0.015	BSD-0.1%-	0.00694668	0.0210921	-0.147	-0.15	0	-0.002
651	Fe2O3BSN/AAmpicillin	2.22094	8.7642	0.816428	0.902115	0.999844	0.693478	CHEMBL174	Fe2O3	BS	N/A	Ampicillin	MIC99 ug ml-1	-1	161.696	MBC (uM)	Bacillus subtilis	MTCC 441	BS	Gram	NO	Bacillus sbtilis	MD	N/A	None	None	0	t	0.263	0	0.014	0.015	BSD-0.1%-	0.00694668	0.0210921	-0.147	-0.15	0	-0.001
652	Fe2O3BSN/AAmpicillin	2.56257	9.10583	1.15805	0.928413	0.999889	0.760979	CHEMBL174	Fe2O3	BS	N/A	Ampicillin	MIC ug.mL-1	-1	50	MBC (uM)	Bacillus subtilis	n.d	BS	Gram	NO	Bacillus sbtilis	MD	N/A	None	None	0	t	0.324	0	0.014	0.015	BSD-0.1%-	0.00694668	0.0210921	-0.147	-0.15	0	-0.001
653	Fe2O3BSN/AAmpicillin	2.921	9.46425	1.51648	0.948875	0.999922	0.820019	CHEMBL174	Fe2O3	BS	N/A	Ampicillin	IZ mm	1	5	MBC (uM)	Bacillus subtilis	n.d	BS	Gram	NO	Bacillus sbtilis	MD	N/A	None	None	0	v	0.388	0	0.014	0.015	BSD-0.1%-	0.00694668	0.0210921	-0.147	-0.15	0	-0.001
654	Fe2O3BSN/AAmpicillin	2.921	9.46425	1.51648	0.948875	0.999922	0.820019	CHEMBL174	Fe2O3	BS	N/A	Ampicillin	IZ mm	1	5	MBC (uM)	Bacillus subtilis	n.d	BS	Gram	NO	Bacillus sbtilis	MD	N/A	None	None	0	t	0.388	0	0.014	0.015	BSD-0.1%-	0.00694668	0.0210921	-0.147	-0.15	0	-0.001
655	AgBSN/AAmpicillin	3.31412	9.85738	1.9096	0.96491	0.999948	0.870974	CHEMBL174	Ag	BS	N/A	Ampicillin	MIC ug.mL-1	-1	50	MBC (uM)	Bacillus subtilis	ATCC6633	BS	Gram	NO	Bacillus subtilis	ATCC6633	Spherical	None	None	0	t	0.324	0	0.014	0.015	BSD-0.1%-	0.00694668	0.0210921	-0.147	-0.135	-0.001	-0.001
656	AgBSN/AAmpicillin	3.31412	9.85738	1.9096	0.96491	0.999948	0.870974	CHEMBL174	Ag	BS	N/A	Ampicillin	MIC ug.mL-1	-1	50	MBC (uM)	Bacillus subtilis	CGMCC 1.1470	BS	Gram	NO	Bacillus subtilis	ATCC6633	Spherical	None	None	0	t	0.324	0	0.014	0.015	BSD-0.1%-	0.00694668	0.0210921	-0.147	-0.135	-0.001	-0.001
657	AgBSN/AAmpicillin	3.31412	9.85738	1.9096	0.96491	0.999948	0.870974	CHEMBL174	Ag	BS	N/A	Ampicillin	MIC ug.mL-1	-1	50	MBC (uM)	Bacillus subtilis	MTCC 441	BS	Gram	NO	Bacillus subtilis	ATCC6633	Spherical	None	None	0	v	0.324	0	0.014	0.015	BSD-0.1%-	0.00694668	0.0210921	-0.147	-0.135	-0.001	-0.001
658	AgBSN/AAmpicillin	3.31412	9.85738	1.9096	0.96491	0.999948	0.870974	CHEMBL174	Ag	BS	N/A	Ampicillin	MIC ug.mL-1	-1	50	MBC (uM)	Bacillus subtilis	n.d	BS	Gram	NO	Bacillus subtilis	ATCC6633	Spherical	None	None	0	t	0.324	0	0.014	0.015	BSD-0.1%-	0.00694668	0.0210921	-0.147	-0.135	-0.001	-0.001
659	AgBSN/AAmpicillin	3.31412	9.85738	1.9096	0.96491	0.999948	0.870974	CHEMBL174	Ag	BS	N/A	Ampicillin	MIC ug.mL-1	-1	50	MBC (uM)	Bacillus subtilis	n.d	BS	Gram	NO	Bacillus subtilis	ATCC6633	Spherical	None	None	0	t	0.324	0	0.014	0.015	BSD-0.1%-	0.00694668	0.0210921	-0.147	-0.135	-0.001	-0.001
660	AgBSN/AAmpicillin	2.14363	8.68689	0.739115	0.895072	0.999831	0.676802	CHEMBL174	Ag	BS	N/A	Ampicillin	MIC nM	-1	2500	MBC (uM)	Bacillus subtilis	n.d	BS	Gram	NO	Bacillus subtilis	ATCC6633	Spherical	None	None	0	t	0.115	0	0.014	0.015	BSD-0.1%-	0.00694668	0.0210921	-0.147	-0.135	-0.001	-0.001
661	AgBSN/AAmpicillin	3.67254	10.2158	2.26803	0.975218	0.999963	0.906194	CHEMBL174	Ag	BS	N/A	Ampicillin	IZ mm	1	5	MBC (uM)	Bacillus subtilis	n.d	BS	Gram	NO	Bacillus subtilis	ATCC6633	Spherical	None	None	0	v	0.388	0	0.014	0.015	BSD-0.1%-	0.00694668	0.0210921	-0.147	-0.135	-0.001	-0.001
662	AgBSN/AAmpicillin	2.14363	8.68689	0.739115	0.895072	0.999831	0.676802	CHEMBL174	Ag	BS	N/A	Ampicillin	MIC nM	-1	2500	MBC (uM)	Bacillus subtilis	NBRC 3134	BS	Gram	NO	Bacillus subtilis	ATCC6633	Spherical	None	None	0	t	0.115	0	0.014	0.015	BSD-0.1%-	0.00694668	0.0210921	-0.147	-0.135	-0.001	-0.001
663	CuOBSN/AAmpicillin	2.56257	9.10583	1.15805	0.928413	0.999889	0.760979	CHEMBL174	CuO	BS	N/A	Ampicillin	MIC ug.mL-1	-1	50	MBC (uM)	Bacillus subtilis	ATCC6633	BS	Gram	NO	Bacillus sbtilis	MD	N/A	None	None	0	t	0.324	0	0.014	0.015	BSD-0.1%-	0.00694668	0.0210921	-0.147	-0.15	0	-0.001
664	CuOBSN/AAmpicillin	2.56257	9.10583	1.15805	0.928413	0.999889	0.760979	CHEMBL174	CuO	BS	N/A	Ampicillin	MIC ug.mL-1	-1	50	MBC (uM)	Bacillus subtilis	ATCC6633	BS	Gram	NO	Bacillus sbtilis	MD	N/A	None	None	0	v	0.324	0	0.014	0.015	BSD-0.1%-	0.00694668	0.0210921	-0.147	-0.15	0	-0.001
665	CuOBSN/AAmpicillin	2.00253	8.54579	0.598012	0.881062	0.999806	0.645201	CHEMBL174	CuO	BS	N/A	Ampicillin	MBC mM	-1	1.674	MBC (uM)	Bacillus subtilis	ATCC6633	BS	Gram	NO	Bacillus sbtilis	MD	N/A	None	None	0	t	0.224	0	0.014	0.015	BSD-0.1%-	0.00694668	0.0210921	-0.147	-0.15	0	-0.001
666	CuOBSN/AAmpicillin	2.921	9.46425	1.51648	0.948875	0.999922	0.820019	CHEMBL174	CuO	BS	N/A	Ampicillin	IZ mm	1	5	MBC (uM)	Bacillus subtilis	ATCC6633	BS	Gram	NO	Bacillus sbtilis	MD	N/A	None	None	0	t	0.388	0	0.014	0.015	BSD-0.1%-	0.00694668	0.0210921	-0.147	-0.15	0	-0.001
667	CuOBSN/AAmpicillin	2.56257	9.10583	1.15805	0.928413	0.999889	0.760979	CHEMBL174	CuO	BS	N/A	Ampicillin	MIC ug.mL-1	-1	50	MBC (uM)	Bacillus subtilis	MTCC 441	BS	Gram	NO	Bacillus sbtilis	MD	N/A	None	None	0	v	0.324	0	0.014	0.015	BSD-0.1%-	0.00694668	0.0210921	-0.147	-0.15	0	-0.001
668	CuOBSN/AAmpicillin	2.56257	9.10583	1.15805	0.928413	0.999889	0.760979	CHEMBL174	CuO	BS	N/A	Ampicillin	MIC ug.mL-1	-1	50	MBC (uM)	Bacillus subtilis	n.d	BS	Gram	NO	Bacillus sbtilis	MD	N/A	None	None	0	t	0.324	0	0.014	0.015	BSD-0.1%-	0.00694668	0.0210921	-0.147	-0.15	0	-0.001
669	CuOBSN/AAmpicillin	2.56257	9.10583	1.15805	0.928413	0.999889	0.760979	CHEMBL174	CuO	BS	N/A	Ampicillin	MIC ug.mL-1	-1	50	MBC (uM)	Bacillus subtilis	n.d	BS	Gram	NO	Bacillus sbtilis	MD	N/A	None	None	0	t	0.324	0	0.014	0.015	BSD-0.1%-	0.00694668	0.0210921	-0.147	-0.15	0	-0.001
670	CuOBSN/AAmpicillin	2.921	9.46425	1.51648	0.948875	0.999922	0.820019	CHEMBL174	CuO	BS	N/A	Ampicillin	IZ mm	1	5	MBC (uM)	Bacillus subtilis	n.d	BS	Gram	NO	Bacillus sbtilis	MD	N/A	None	None	0	t	0.388	0	0.014	0.015	BSD-0.1%-	0.00694668	0.0210921	-0.147	-0.15	0	-0.001
671	CuOBSN/AAmpicillin	2.921	9.46425	1.51648	0.948875	0.999922	0.820019	CHEMBL174	CuO	BS	N/A	Ampicillin	IZ mm	1	5	MBC (uM)	Bacillus subtilis	n.d	BS	Gram	NO	Bacillus sbtilis	MD	N/A	None	None	0	v	0.388	0	0.014	0.015	BSD-0.1%-	0.00694668	0.0210921	-0.147	-0.15	0	-0.001
672	CuBSN/AAmpicillin	1.33667	7.87993	-0.0678424	0.791942	0.999622	0.483046	CHEMBL174	Cu	BS	N/A	Ampicillin	MIC ug.mL-1	-1	50	MBC (uM)	Bacillus subtilis	ATCC6633	BS	Gram	NO	Bacillus subtilis	ATCC6633	Spherical	None	None	0	t	0.324	0	0.014	0.015	BSD-0.1%-	0.00694668	0.0210921	-0.147	-0.15	-0.001	-0.001
673	CuBSN/AAmpicillin	1.33667	7.87993	-0.0678424	0.791942	0.999622	0.483046	CHEMBL174	Cu	BS	N/A	Ampicillin	MIC ug.mL-1	-1	50	MBC (uM)	Bacillus subtilis	n.d	BS	Gram	NO	Bacillus subtilis	ATCC6633	Spherical	None	None	0	v	0.324	0	0.014	0.015	BSD-0.1%-	0.00694668	0.0210921	-0.147	-0.15	-0.001	-0.001
674	CuBSN/AAmpicillin	1.33667	7.87993	-0.0678424	0.791942	0.999622	0.483046	CHEMBL174	Cu	BS	N/A	Ampicillin	MIC ug.mL-1	-1	50	MBC (uM)	Bacillus subtilis	n.d	BS	Gram	NO	Bacillus subtilis	ATCC6633	Spherical	None	None	0	t	0.324	0	0.014	0.015	BSD-0.1%-	0.00694668	0.0210921	-0.147	-0.15	-0.001	-0.001
675	CuBSN/AAmpicillin	0.166188	6.70945	-1.23833	0.541452	0.998782	0.224727	CHEMBL174	Cu	BS	N/A	Ampicillin	MIC nM	-1	2500	MBC (uM)	Bacillus subtilis	n.d	BS	Gram	NO	Bacillus subtilis	ATCC6633	Spherical	None	None	0	t	0.115	0	0.014	0.015	BSD-0.1%-	0.00694668	0.0210921	-0.147	-0.15	-0.001	-0.001
676	CuBSN/AAmpicillin	1.6951	8.23836	0.290584	0.844894	0.999736	0.572139	CHEMBL174	Cu	BS	N/A	Ampicillin	IZ mm	1	5	MBC (uM)	Bacillus subtilis	n.d	BS	Gram	NO	Bacillus subtilis	ATCC6633	Spherical	None	None	0	t	0.388	0	0.014	0.015	BSD-0.1%-	0.00694668	0.0210921	-0.147	-0.15	-0.001	-0.001
677	CuBSN/AAmpicillin	1.6951	8.23836	0.290584	0.844894	0.999736	0.572139	CHEMBL174	Cu	BS	N/A	Ampicillin	IZ mm	1	5	MBC (uM)	Bacillus subtilis	n.d	BS	Gram	NO	Bacillus subtilis	ATCC6633	Spherical	None	None	0	v	0.388	0	0.014	0.015	BSD-0.1%-	0.00694668	0.0210921	-0.147	-0.15	-0.001	-0.001
678	CuOBSN/AAmpicillin	2.56257	9.10583	1.15805	0.928413	0.999889	0.760979	CHEMBL174	CuO	BS	N/A	Ampicillin	MIC ug.mL-1	-1	50	MBC (uM)	Bacillus subtilis	ATCC6633	BS	Gram	NO	Bacillus sbtilis	MD	N/A	None	None	0	t	0.324	0	0.014	0.015	BSD-0.1%-	0.00694668	0.0210921	-0.147	-0.15	0	-0.001
679	CuOBSN/AAmpicillin	2.921	9.46425	1.51648	0.948875	0.999922	0.820019	CHEMBL174	CuO	BS	N/A	Ampicillin	IZ mm	1	5	MBC (uM)	Bacillus subtilis	ATCC6633	BS	Gram	NO	Bacillus sbtilis	MD	N/A	None	None	0	t	0.388	0	0.014	0.015	BSD-0.1%-	0.00694668	0.0210921	-0.147	-0.15	0	-0.001
680	CuOBSN/AAmpicillin	2.22094	8.7642	0.816428	0.902115	0.999844	0.693478	CHEMBL174	CuO	BS	N/A	Ampicillin	MIC99 ug ml-1	-1	161.696	MBC (uM)	Bacillus subtilis	MTCC 441	BS	Gram	NO	Bacillus sbtilis	MD	N/A	None	None	0	v	0.263	0	0.014	0.015	BSD-0.1%-	0.00694668	0.0210921	-0.147	-0.15	0	-0.001
681	CuOBSN/AAmpicillin	2.83699	9.38025	1.43247	0.944642	0.999916	0.807286	CHEMBL174	CuO	BS	N/A	Ampicillin	MIC50 ug.mL-1	-1	21.529	MBC (uM)	Bacillus subtilis	MTCC 441	BS	Gram	NO	Bacillus sbtilis	MD	N/A	None	None	0	t	0.373	0	0.014	0.015	BSD-0.1%-	0.00694668	0.0210921	-0.147	-0.15	0	-0.001
682	CuOBSN/AAmpicillin	2.56257	9.10583	1.15805	0.928413	0.999889	0.760979	CHEMBL174	CuO	BS	N/A	Ampicillin	MIC ug.mL-1	-1	50	MBC (uM)	Bacillus subtilis	n.d	BS	Gram	NO	Bacillus sbtilis	MD	N/A	None	None	0	t	0.324	0	0.014	0.015	BSD-0.1%-	0.00694668	0.0210921	-0.147	-0.15	0	-0.001
683	CuOBSN/AAmpicillin	2.56257	9.10583	1.15805	0.928413	0.999889	0.760979	CHEMBL174	CuO	BS	N/A	Ampicillin	MIC ug.mL-1	-1	50	MBC (uM)	Bacillus subtilis	n.d	BS	Gram	NO	Bacillus sbtilis	MD	N/A	None	None	0	v	0.324	0	0.014	0.015	BSD-0.1%-	0.00694668	0.0210921	-0.147	-0.15	0	-0.001
684	CuOBSN/AAmpicillin	2.921	9.46425	1.51648	0.948875	0.999922	0.820019	CHEMBL174	CuO	BS	N/A	Ampicillin	IZ mm	1	5	MBC (uM)	Bacillus subtilis	n.d	BS	Gram	NO	Bacillus sbtilis	MD	N/A	None	None	0	t	0.388	0	0.014	0.015	BSD-0.1%-	0.00694668	0.0210921	-0.147	-0.15	0	-0.001
685	CuOBSN/AAmpicillin	2.921	9.46425	1.51648	0.948875	0.999922	0.820019	CHEMBL174	CuO	BS	N/A	Ampicillin	IZ mm	1	5	MBC (uM)	Bacillus subtilis	n.d	BS	Gram	NO	Bacillus sbtilis	MD	N/A	None	None	0	t	0.388	0	0.014	0.015	BSD-0.1%-	0.00694668	0.0210921	-0.147	-0.15	0	-0.001
686	CuOBSN/AAmpicillin	2.5366	9.07985	1.13208	0.926668	0.999886	0.756222	CHEMBL174	CuO	BS	N/A	Ampicillin	MIC ug.mL-1	-1	50	MBC (uM)	Bacillus subtilis	NCIM 2063; ATCC6633	BS	Gram	NO	Bacillus sbtilis	MD	N/A	None	None	0	t	0.324	0	0.014	0.015	BSD-0.1%-	0.00694668	0.0210921	-0.147	-0.15	0	-0.002
687	CuOBSN/AAmpicillin	2.89502	9.43828	1.49051	0.9476	0.99992	0.816154	CHEMBL174	CuO	BS	N/A	Ampicillin	IZ mm	1	5	MBC (uM)	Bacillus subtilis	RSKK 244	BS	Gram	NO	Bacillus sbtilis	MD	N/A	None	None	0	t	0.388	0	0.014	0.015	BSD-0.1%-	0.00694668	0.0210921	-0.147	-0.15	0	-0.002
688	CuOBSN/AAmpicillin	2.89502	9.43828	1.49051	0.9476	0.99992	0.816154	CHEMBL174	CuO	BS	N/A	Ampicillin	IZ mm	1	5	MBC (uM)	Bacillus subtilis	UFPEDA 16	BS	Gram	NO	Bacillus sbtilis	MD	N/A	None	None	0	t	0.388	0	0.014	0.015	BSD-0.1%-	0.00694668	0.0210921	-0.147	-0.15	0	-0.002
689	CuIBSN/AAmpicillin	3.44582	9.98908	2.0413	0.969106	0.999954	0.885066	CHEMBL174	CuI	BS	N/A	Ampicillin	MIC ug.mL-1	-1	50	MBC (uM)	Bacillus subtilis	ATCC6633	BS	Gram	NO	Bacillus subtilis	ATCC6633	N/A	None	None	0	t	0.324	0	0.014	0.015	BSD-0.1%-	0.00694668	0.0210921	-0.143	-0.15	-0.001	-0.001
690	CuIBSN/AAmpicillin	2.27533	8.81859	0.870816	0.906813	0.999852	0.704915	CHEMBL174	CuI	BS	N/A	Ampicillin	MIC nM	-1	2500	MBC (uM)	Bacillus subtilis	MTCC 121	BS	Gram	NO	Bacillus subtilis	ATCC6633	N/A	None	None	0	v	0.115	0	0.014	0.015	BSD-0.1%-	0.00694668	0.0210921	-0.143	-0.15	-0.001	-0.001
691	CuIBSN/AAmpicillin	3.44582	9.98908	2.0413	0.969106	0.999954	0.885066	CHEMBL174	CuI	BS	N/A	Ampicillin	MIC ug.mL-1	-1	50	MBC (uM)	Bacillus subtilis	MTCC 441	BS	Gram	NO	Bacillus subtilis	ATCC6633	N/A	None	None	0	t	0.324	0	0.014	0.015	BSD-0.1%-	0.00694668	0.0210921	-0.143	-0.15	-0.001	-0.001
692	CuIBSN/AAmpicillin	3.44582	9.98908	2.0413	0.969106	0.999954	0.885066	CHEMBL174	CuI	BS	N/A	Ampicillin	MIC ug.mL-1	-1	50	MBC (uM)	Bacillus subtilis	n.d	BS	Gram	NO	Bacillus subtilis	ATCC6633	N/A	None	None	0	t	0.324	0	0.014	0.015	BSD-0.1%-	0.00694668	0.0210921	-0.143	-0.15	-0.001	-0.001
693	CuIBSN/AAmpicillin	3.44582	9.98908	2.0413	0.969106	0.999954	0.885066	CHEMBL174	CuI	BS	N/A	Ampicillin	MIC ug.mL-1	-1	50	MBC (uM)	Bacillus subtilis	n.d	BS	Gram	NO	Bacillus subtilis	ATCC6633	N/A	None	None	0	t	0.324	0	0.014	0.015	BSD-0.1%-	0.00694668	0.0210921	-0.143	-0.15	-0.001	-0.001
694	CuIBSN/AAmpicillin	2.27533	8.81859	0.870816	0.906813	0.999852	0.704915	CHEMBL174	CuI	BS	N/A	Ampicillin	MIC nM	-1	2500	MBC (uM)	Bacillus subtilis	n.d	BS	Gram	NO	Bacillus subtilis	ATCC6633	N/A	None	None	0	v	0.115	0	0.014	0.015	BSD-0.1%-	0.00694668	0.0210921	-0.143	-0.15	-0.001	-0.001
695	CuIBSN/AAmpicillin	3.80424	10.3475	2.39973	0.978209	0.999968	0.916807	CHEMBL174	CuI	BS	N/A	Ampicillin	IZ mm	1	5	MBC (uM)	Bacillus subtilis	n.d	BS	Gram	NO	Bacillus subtilis	ATCC6633	N/A	None	None	0	t	0.388	0	0.014	0.015	BSD-0.1%-	0.00694668	0.0210921	-0.143	-0.15	-0.001	-0.001
696	CuOBSN/AAmpicillin	2.56257	9.10583	1.15805	0.928413	0.999889	0.760979	CHEMBL174	CuO	BS	N/A	Ampicillin	MIC ug.mL-1	-1	50	MBC (uM)	Bacillus subtilis	ATCC6633	BS	Gram	NO	Bacillus sbtilis	MD	N/A	None	None	0	t	0.324	0	0.014	0.015	BSD-0.1%-	0.00694668	0.0210921	-0.147	-0.15	0	-0.001
697	CuOBSN/AAmpicillin	2.56257	9.10583	1.15805	0.928413	0.999889	0.760979	CHEMBL174	CuO	BS	N/A	Ampicillin	MIC ug.mL-1	-1	50	MBC (uM)	Bacillus subtilis	ATCC6633	BS	Gram	NO	Bacillus sbtilis	MD	N/A	None	None	0	v	0.324	0	0.014	0.015	BSD-0.1%-	0.00694668	0.0210921	-0.147	-0.15	0	-0.001
698	CuOBSN/AAmpicillin	2.921	9.46425	1.51648	0.948875	0.999922	0.820019	CHEMBL174	CuO	BS	N/A	Ampicillin	IZ mm	1	5	MBC (uM)	Bacillus subtilis	ATCC6633	BS	Gram	NO	Bacillus sbtilis	MD	N/A	None	None	0	t	0.388	0	0.014	0.015	BSD-0.1%-	0.00694668	0.0210921	-0.147	-0.15	0	-0.001
699	CuOBSN/AAmpicillin	2.56257	9.10583	1.15805	0.928413	0.999889	0.760979	CHEMBL174	CuO	BS	N/A	Ampicillin	MIC ug.mL-1	-1	50	MBC (uM)	Bacillus subtilis	MTCC 441	BS	Gram	NO	Bacillus sbtilis	MD	N/A	None	None	0	t	0.324	0	0.014	0.015	BSD-0.1%-	0.00694668	0.0210921	-0.147	-0.15	0	-0.001
700	CuOBSN/AAmpicillin	2.56257	9.10583	1.15805	0.928413	0.999889	0.760979	CHEMBL174	CuO	BS	N/A	Ampicillin	MIC ug.mL-1	-1	50	MBC (uM)	Bacillus subtilis	n.d	BS	Gram	NO	Bacillus sbtilis	MD	N/A	None	None	0	t	0.324	0	0.014	0.015	BSD-0.1%-	0.00694668	0.0210921	-0.147	-0.15	0	-0.001
701	CuOBSN/AAmpicillin	2.56257	9.10583	1.15805	0.928413	0.999889	0.760979	CHEMBL174	CuO	BS	N/A	Ampicillin	MIC ug.mL-1	-1	50	MBC (uM)	Bacillus subtilis	n.d	BS	Gram	NO	Bacillus sbtilis	MD	N/A	None	None	0	v	0.324	0	0.014	0.015	BSD-0.1%-	0.00694668	0.0210921	-0.147	-0.15	0	-0.001
702	CuOBSN/AAmpicillin	2.921	9.46425	1.51648	0.948875	0.999922	0.820019	CHEMBL174	CuO	BS	N/A	Ampicillin	IZ mm	1	5	MBC (uM)	Bacillus subtilis	n.d	BS	Gram	NO	Bacillus sbtilis	MD	N/A	None	None	0	t	0.388	0	0.014	0.015	BSD-0.1%-	0.00694668	0.0210921	-0.147	-0.15	0	-0.001
703	CuOBSN/AAmpicillin	2.921	9.46425	1.51648	0.948875	0.999922	0.820019	CHEMBL174	CuO	BS	N/A	Ampicillin	IZ mm	1	5	MBC (uM)	Bacillus subtilis	n.d	BS	Gram	NO	Bacillus sbtilis	MD	N/A	None	None	0	t	0.388	0	0.014	0.015	BSD-0.1%-	0.00694668	0.0210921	-0.147	-0.15	0	-0.001
704	CuOBSN/AAmpicillin	2.89502	9.43828	1.49051	0.9476	0.99992	0.816154	CHEMBL174	CuO	BS	N/A	Ampicillin	IZ mm	1	5	MBC (uM)	Bacillus subtilis	RCMB 010063	BS	Gram	NO	Bacillus sbtilis	MD	N/A	None	None	0	t	0.388	0	0.014	0.015	BSD-0.1%-	0.00694668	0.0210921	-0.147	-0.15	0	-0.002
705	CuOBSN/AAmpicillin	2.89502	9.43828	1.49051	0.9476	0.99992	0.816154	CHEMBL174	CuO	BS	N/A	Ampicillin	IZ mm	1	5	MBC (uM)	Bacillus subtilis	RSKK 244	BS	Gram	NO	Bacillus sbtilis	MD	N/A	None	None	0	v	0.388	0	0.014	0.015	BSD-0.1%-	0.00694668	0.0210921	-0.147	-0.15	0	-0.002
706	CuOBSN/AAmpicillin	2.56257	9.10583	1.15805	0.928413	0.999889	0.760979	CHEMBL174	CuO	BS	N/A	Ampicillin	MIC ug.mL-1	-1	50	MBC (uM)	Bacillus subtilis	ATCC6633	BS	Gram	NO	Bacillus sbtilis	MD	N/A	None	None	0	t	0.324	0	0.014	0.015	BSD-0.1%-	0.00694668	0.0210921	-0.147	-0.15	0	-0.001
707	CuOBSN/AAmpicillin	2.56257	9.10583	1.15805	0.928413	0.999889	0.760979	CHEMBL174	CuO	BS	N/A	Ampicillin	MIC ug.mL-1	-1	50	MBC (uM)	Bacillus subtilis	ATCC6633	BS	Gram	NO	Bacillus sbtilis	MD	N/A	None	None	0	t	0.324	0	0.014	0.015	BSD-0.1%-	0.00694668	0.0210921	-0.147	-0.15	0	-0.001
708	CuOBSN/AAmpicillin	1.39208	7.93534	-0.0124328	0.800925	0.999642	0.496892	CHEMBL174	CuO	BS	N/A	Ampicillin	MIC nM	-1	2500	MBC (uM)	Bacillus subtilis	ATCC6633	BS	Gram	NO	Bacillus sbtilis	MD	N/A	None	None	0	t	0.115	0	0.014	0.015	BSD-0.1%-	0.00694668	0.0210921	-0.147	-0.15	0	-0.001
709	CuOBSN/AAmpicillin	2.921	9.46425	1.51648	0.948875	0.999922	0.820019	CHEMBL174	CuO	BS	N/A	Ampicillin	IZ mm	1	5	MBC (uM)	Bacillus subtilis	ATCC6633	BS	Gram	NO	Bacillus sbtilis	MD	N/A	None	None	0	v	0.388	0	0.014	0.015	BSD-0.1%-	0.00694668	0.0210921	-0.147	-0.15	0	-0.001
710	CuOBSN/AAmpicillin	2.5366	9.07985	1.13208	0.926668	0.999886	0.756222	CHEMBL174	CuO	BS	N/A	Ampicillin	MIC ug.mL-1	-1	50	MBC (uM)	Bacillus subtilis	IFO 3007	BS	Gram	NO	Bacillus sbtilis	MD	N/A	None	None	0	t	0.324	0	0.014	0.015	BSD-0.1%-	0.00694668	0.0210921	-0.147	-0.15	0	-0.002
711	CuOBSN/AAmpicillin	2.56257	9.10583	1.15805	0.928413	0.999889	0.760979	CHEMBL174	CuO	BS	N/A	Ampicillin	MIC ug.mL-1	-1	50	MBC (uM)	Bacillus subtilis	n.d	BS	Gram	NO	Bacillus sbtilis	MD	N/A	None	None	0	t	0.324	0	0.014	0.015	BSD-0.1%-	0.00694668	0.0210921	-0.147	-0.15	0	-0.001
712	CuOBSN/AAmpicillin	2.56257	9.10583	1.15805	0.928413	0.999889	0.760979	CHEMBL174	CuO	BS	N/A	Ampicillin	MIC ug.mL-1	-1	50	MBC (uM)	Bacillus subtilis	n.d	BS	Gram	NO	Bacillus sbtilis	MD	N/A	None	None	0	v	0.324	0	0.014	0.015	BSD-0.1%-	0.00694668	0.0210921	-0.147	-0.15	0	-0.001
713	CuBSN/AAmpicillin	1.89671	8.43997	0.492198	0.869519	0.999784	0.620624	CHEMBL174	Cu	BS	N/A	Ampicillin	MIC ug.mL-1	-1	50	MIC (uM)	Bacillus subtilis	MTCC 441	BS	Gram	NO	Bacillus subtilis	ATCC6633	Spherical	None	None	0	v	0.424	0	0.014	0.015	BSD-0.1%-	0.00694668	0.0210921	-0.147	-0.15	-0.001	-0.001
714	CuBSN/AAmpicillin	2.36155	8.90481	0.957032	0.913848	0.999864	0.722527	CHEMBL174	Cu	BS	N/A	Ampicillin	IZ mm	1	5	MIC (uM)	Bacillus subtilis	MTCC 441	BS	Gram	NO	Bacillus subtilis	ATCC6633	Spherical	None	None	0	t	0.507	0	0.014	0.015	BSD-0.1%-	0.00694668	0.0210921	-0.147	-0.15	-0.001	-0.001
715	CuBSN/AAmpicillin	1.89671	8.43997	0.492198	0.869519	0.999784	0.620624	CHEMBL174	Cu	BS	N/A	Ampicillin	MIC ug.mL-1	-1	50	MIC (uM)	Bacillus subtilis	n.d	BS	Gram	NO	Bacillus subtilis	ATCC6633	Spherical	None	None	0	t	0.424	0	0.014	0.015	BSD-0.1%-	0.00694668	0.0210921	-0.147	-0.15	-0.001	-0.001
716	CuBSN/AAmpicillin	1.89671	8.43997	0.492198	0.869519	0.999784	0.620624	CHEMBL174	Cu	BS	N/A	Ampicillin	MIC ug.mL-1	-1	50	MIC (uM)	Bacillus subtilis	n.d	BS	Gram	NO	Bacillus subtilis	ATCC6633	Spherical	None	None	0	v	0.424	0	0.014	0.015	BSD-0.1%-	0.00694668	0.0210921	-0.147	-0.15	-0.001	-0.001
717	CuBSN/AAmpicillin	2.36155	8.90481	0.957032	0.913848	0.999864	0.722527	CHEMBL174	Cu	BS	N/A	Ampicillin	IZ mm	1	5	MIC (uM)	Bacillus subtilis	n.d	BS	Gram	NO	Bacillus subtilis	ATCC6633	Spherical	None	None	0	t	0.507	0	0.014	0.015	BSD-0.1%-	0.00694668	0.0210921	-0.147	-0.15	-0.001	-0.001
718	CuBSN/AAmpicillin	1.89671	8.43997	0.492198	0.869519	0.999784	0.620624	CHEMBL174	Cu	BS	N/A	Ampicillin	MIC ug.mL-1	-1	50	MIC (uM)	Bacillus subtilis	NCIM 2063	BS	Gram	NO	Bacillus subtilis	ATCC6633	Spherical	None	None	0	t	0.424	0	0.014	0.015	BSD-0.1%-	0.00694668	0.0210921	-0.147	-0.15	-0.001	-0.001
719	CuBSN/AAmpicillin	2.33558	8.87883	0.931059	0.911781	0.999861	0.71729	CHEMBL174	Cu	BS	N/A	Ampicillin	IZ mm	1	5	MIC (uM)	Bacillus subtilis	NCIM 2063; ATCC6633	BS	Gram	NO	Bacillus subtilis	ATCC6633	Spherical	None	None	0	t	0.507	0	0.014	0.015	BSD-0.1%-	0.00694668	0.0210921	-0.147	-0.15	-0.001	-0.002
720	CuBSN/AAmpicillin	2.43947	8.98273	1.03495	0.919788	0.999874	0.737875	CHEMBL174	Cu	BS	N/A	Ampicillin	IZ mm	1	5	MIC (uM)	Bacillus subtilis	RCMB 010067	BS	Gram	NO	Bacillus subtilis	ATCC6633	Spherical	None	None	0	v	0.507	0	0.014	0.015	BSD-0.1%-	0.00694668	0.0210921	-0.147	-0.15	-0.001	0.002
721	AgBSN/AAmpicillin	2.45725	9.00051	1.05274	0.92109	0.999877	0.7413	CHEMBL174	Ag	BS	N/A	Ampicillin	Inhibition %	1	70	MIC (uM)	Bacillus subtilis	ATCC6633	BS	Gram	NO	Bacillus subtilis	ATCC6633	Spherical	None	None	0	t	0.171	0	0.014	0.015	BSD-0.1%-	0.00694668	0.0210921	-0.147	-0.135	-0.001	-0.001
722	AgBSN/AAmpicillin	3.87416	10.4174	2.46964	0.979651	0.99997	0.921986	CHEMBL174	Ag	BS	N/A	Ampicillin	MIC ug.mL-1	-1	50	MIC (uM)	Bacillus subtilis	MTCC 441	BS	Gram	NO	Bacillus subtilis	ATCC6633	Spherical	None	None	0	t	0.424	0	0.014	0.015	BSD-0.1%-	0.00694668	0.0210921	-0.147	-0.135	-0.001	-0.001
723	AgBSN/AAmpicillin	3.87416	10.4174	2.46964	0.979651	0.99997	0.921986	CHEMBL174	Ag	BS	N/A	Ampicillin	MIC ug.mL-1	-1	50	MIC (uM)	Bacillus subtilis	n.d	BS	Gram	NO	Bacillus subtilis	ATCC6633	Spherical	None	None	0	v	0.424	0	0.014	0.015	BSD-0.1%-	0.00694668	0.0210921	-0.147	-0.135	-0.001	-0.001
724	AgBSN/AAmpicillin	3.87416	10.4174	2.46964	0.979651	0.99997	0.921986	CHEMBL174	Ag	BS	N/A	Ampicillin	MIC ug.mL-1	-1	50	MIC (uM)	Bacillus subtilis	n.d	BS	Gram	NO	Bacillus subtilis	ATCC6633	Spherical	None	None	0	t	0.424	0	0.014	0.015	BSD-0.1%-	0.00694668	0.0210921	-0.147	-0.135	-0.001	-0.001
725	AgBSN/AAmpicillin	3.87416	10.4174	2.46964	0.979651	0.99997	0.921986	CHEMBL174	Ag	BS	N/A	Ampicillin	MIC ug.mL-1	-1	50	MIC (uM)	Bacillus subtilis	n.d	BS	Gram	NO	Bacillus subtilis	ATCC6633	Spherical	None	None	0	t	0.424	0	0.014	0.015	BSD-0.1%-	0.00694668	0.0210921	-0.147	-0.135	-0.001	-0.001
726	AgBSN/AAmpicillin	4.33899	10.8823	2.93448	0.987118	0.999981	0.949525	CHEMBL174	Ag	BS	N/A	Ampicillin	IZ mm	1	5	MIC (uM)	Bacillus subtilis	n.d	BS	Gram	NO	Bacillus subtilis	ATCC6633	Spherical	None	None	0	t	0.507	0	0.014	0.015	BSD-0.1%-	0.00694668	0.0210921	-0.147	-0.135	-0.001	-0.001
727	AgBSN/AAmpicillin	3.87416	10.4174	2.46964	0.979651	0.99997	0.921986	CHEMBL174	Ag	BS	N/A	Ampicillin	MIC ug.mL-1	-1	50	MIC (uM)	Bacillus subtilis	NCIM 2063	BS	Gram	NO	Bacillus subtilis	ATCC6633	Spherical	None	None	0	v	0.424	0	0.014	0.015	BSD-0.1%-	0.00694668	0.0210921	-0.147	-0.135	-0.001	-0.001
728	CuOBSN/AAmpicillin	3.09664	9.6399	1.69212	0.956754	0.999935	0.844503	CHEMBL174	CuO	BS	N/A	Ampicillin	MIC ug.mL-1	-1	50	MIC (uM)	Bacillus subtilis	ATCC11229	BS	Gram	NO	Bacillus sbtilis	MD	N/A	None	None	0	t	0.424	0	0.014	0.015	BSD-0.1%-	0.00694668	0.0210921	-0.147	-0.15	0	-0.002
729	CuOBSN/AAmpicillin	3.12261	9.66587	1.71809	0.957816	0.999937	0.847883	CHEMBL174	CuO	BS	N/A	Ampicillin	MIC ug.mL-1	-1	50	MIC (uM)	Bacillus subtilis	ATCC6633	BS	Gram	NO	Bacillus sbtilis	MD	N/A	None	None	0	t	0.424	0	0.014	0.015	BSD-0.1%-	0.00694668	0.0210921	-0.147	-0.15	0	-0.001
730	CuOBSN/AAmpicillin	1.5937	8.13696	0.189182	0.831136	0.999708	0.547155	CHEMBL174	CuO	BS	N/A	Ampicillin	MIC nM	-1	2500	MIC (uM)	Bacillus subtilis	ATCC6633	BS	Gram	NO	Bacillus sbtilis	MD	N/A	None	None	0	t	0.151	0	0.014	0.015	BSD-0.1%-	0.00694668	0.0210921	-0.147	-0.15	0	-0.001
731	CuOBSN/AAmpicillin	3.58744	10.1307	2.18293	0.973076	0.99996	0.898706	CHEMBL174	CuO	BS	N/A	Ampicillin	IZ mm	1	5	MIC (uM)	Bacillus subtilis	ATCC6633	BS	Gram	NO	Bacillus sbtilis	MD	N/A	None	None	0	v	0.507	0	0.014	0.015	BSD-0.1%-	0.00694668	0.0210921	-0.147	-0.15	0	-0.001
732	CuOBSN/AAmpicillin	3.09664	9.6399	1.69212	0.956754	0.999935	0.844503	CHEMBL174	CuO	BS	N/A	Ampicillin	MIC ug.mL-1	-1	50	MIC (uM)	Bacillus subtilis	IFO 3007	BS	Gram	NO	Bacillus sbtilis	MD	N/A	None	None	0	t	0.424	0	0.014	0.015	BSD-0.1%-	0.00694668	0.0210921	-0.147	-0.15	0	-0.002
733	CuOBSN/AAmpicillin	2.21177	8.75503	0.807255	0.901302	0.999842	0.691524	CHEMBL174	CuO	BS	N/A	Ampicillin	GI mM	1	16.636	MIC (uM)	Bacillus subtilis	IFO 3007	BS	Gram	NO	Bacillus sbtilis	MD	N/A	None	None	0	t	0.266	0	0.014	0.015	BSD-0.1%-	0.00694668	0.0210921	-0.147	-0.15	0	-0.002
734	CuOBSN/AAmpicillin	3.12261	9.66587	1.71809	0.957816	0.999937	0.847883	CHEMBL174	CuO	BS	N/A	Ampicillin	MIC ug.mL-1	-1	50	MIC (uM)	Bacillus subtilis	MTCC 441	BS	Gram	NO	Bacillus sbtilis	MD	N/A	None	None	0	v	0.424	0	0.014	0.015	BSD-0.1%-	0.00694668	0.0210921	-0.147	-0.15	0	-0.001
735	CuOBSN/AAmpicillin	3.12261	9.66587	1.71809	0.957816	0.999937	0.847883	CHEMBL174	CuO	BS	N/A	Ampicillin	MIC ug.mL-1	-1	50	MIC (uM)	Bacillus subtilis	n.d	BS	Gram	NO	Bacillus sbtilis	MD	N/A	None	None	0	t	0.424	0	0.014	0.015	BSD-0.1%-	0.00694668	0.0210921	-0.147	-0.15	0	-0.001
736	CuOBSN/AAmpicillin	3.18981	9.73307	1.7853	0.960449	0.999941	0.85635	CHEMBL174	CuO	BS	N/A	Ampicillin	MBC ug ml-1	-1	117.213	MIC (uM)	Bacillus subtilis	n.d	BS	Gram	NO	Bacillus sbtilis	MD	N/A	None	None	0	t	0.436	0	0.014	0.015	BSD-0.1%-	0.00694668	0.0210921	-0.147	-0.15	0	-0.001
737	CuOBSN/AAmpicillin	3.58744	10.1307	2.18293	0.973076	0.99996	0.898706	CHEMBL174	CuO	BS	N/A	Ampicillin	IZ mm	1	5	MIC (uM)	Bacillus subtilis	n.d	BS	Gram	NO	Bacillus sbtilis	MD	N/A	None	None	0	v	0.507	0	0.014	0.015	BSD-0.1%-	0.00694668	0.0210921	-0.147	-0.15	0	-0.001
738	CuOBSN/AAmpicillin	3.58744	10.1307	2.18293	0.973076	0.99996	0.898706	CHEMBL174	CuO	BS	N/A	Ampicillin	IZ mm	1	5	MIC (uM)	Bacillus subtilis	n.d	BS	Gram	NO	Bacillus sbtilis	MD	N/A	None	None	0	t	0.507	0	0.014	0.015	BSD-0.1%-	0.00694668	0.0210921	-0.147	-0.15	0	-0.001
739	CuOBSN/AAmpicillin	3.58744	10.1307	2.18293	0.973076	0.99996	0.898706	CHEMBL174	CuO	BS	N/A	Ampicillin	IZ mm	1	5	MIC (uM)	Bacillus subtilis	NCTC 10400	BS	Gram	NO	Bacillus sbtilis	MD	N/A	None	None	0	t	0.507	0	0.014	0.015	BSD-0.1%-	0.00694668	0.0210921	-0.147	-0.15	0	-0.001
740	CuOBSN/AAmpicillin	3.20053	9.74379	1.79601	0.960854	0.999941	0.857663	CHEMBL174	CuO	BS	N/A	Ampicillin	MIC ug.mL-1	-1	50	MIC (uM)	Bacillus subtilis	RCMB 010067	BS	Gram	NO	Bacillus sbtilis	MD	N/A	None	None	0	v	0.424	0	0.014	0.015	BSD-0.1%-	0.00694668	0.0210921	-0.147	-0.15	0	0.002
741	CuOBSN/AAmpicillin	3.12261	9.66587	1.71809	0.957816	0.999937	0.847883	CHEMBL174	CuO	BS	N/A	Ampicillin	MIC ug.mL-1	-1	50	MIC (uM)	Bacillus subtilis	ATCC6633	BS	Gram	NO	Bacillus sbtilis	MD	N/A	None	None	0	t	0.424	0	0.014	0.015	BSD-0.1%-	0.00694668	0.0210921	-0.147	-0.15	0	-0.001
742	CuOBSN/AAmpicillin	3.58744	10.1307	2.18293	0.973076	0.99996	0.898706	CHEMBL174	CuO	BS	N/A	Ampicillin	IZ mm	1	5	MIC (uM)	Bacillus subtilis	ATCC6633	BS	Gram	NO	Bacillus sbtilis	MD	N/A	None	None	0	t	0.507	0	0.014	0.015	BSD-0.1%-	0.00694668	0.0210921	-0.147	-0.15	0	-0.001
743	CuOBSN/AAmpicillin	3.09664	9.6399	1.69212	0.956754	0.999935	0.844503	CHEMBL174	CuO	BS	N/A	Ampicillin	MIC ug.mL-1	-1	50	MIC (uM)	Bacillus subtilis	IFO 3007	BS	Gram	NO	Bacillus sbtilis	MD	N/A	None	None	0	t	0.424	0	0.014	0.015	BSD-0.1%-	0.00694668	0.0210921	-0.147	-0.15	0	-0.002
744	CuOBSN/AAmpicillin	3.56147	10.1047	2.15695	0.972387	0.999959	0.896317	CHEMBL174	CuO	BS	N/A	Ampicillin	IZ mm	1	5	MIC (uM)	Bacillus subtilis	IFO 3007	BS	Gram	NO	Bacillus sbtilis	MD	N/A	None	None	0	v	0.507	0	0.014	0.015	BSD-0.1%-	0.00694668	0.0210921	-0.147	-0.15	0	-0.002
745	CuOBSN/AAmpicillin	3.12261	9.66587	1.71809	0.957816	0.999937	0.847883	CHEMBL174	CuO	BS	N/A	Ampicillin	MIC ug.mL-1	-1	50	MIC (uM)	Bacillus subtilis	MTCC 441	BS	Gram	NO	Bacillus sbtilis	MD	N/A	None	None	0	t	0.424	0	0.014	0.015	BSD-0.1%-	0.00694668	0.0210921	-0.147	-0.15	0	-0.001
746	CuOBSN/AAmpicillin	3.12261	9.66587	1.71809	0.957816	0.999937	0.847883	CHEMBL174	CuO	BS	N/A	Ampicillin	MIC ug.mL-1	-1	50	MIC (uM)	Bacillus subtilis	n.d	BS	Gram	NO	Bacillus sbtilis	MD	N/A	None	None	0	t	0.424	0	0.014	0.015	BSD-0.1%-	0.00694668	0.0210921	-0.147	-0.15	0	-0.001
747	CuOBSN/AAmpicillin	3.12261	9.66587	1.71809	0.957816	0.999937	0.847883	CHEMBL174	CuO	BS	N/A	Ampicillin	MIC ug.mL-1	-1	50	MIC (uM)	Bacillus subtilis	n.d	BS	Gram	NO	Bacillus sbtilis	MD	N/A	None	None	0	v	0.424	0	0.014	0.015	BSD-0.1%-	0.00694668	0.0210921	-0.147	-0.15	0	-0.001
748	CuOBSN/AAmpicillin	3.18981	9.73307	1.7853	0.960449	0.999941	0.85635	CHEMBL174	CuO	BS	N/A	Ampicillin	MBC ug ml-1	-1	117.213	MIC (uM)	Bacillus subtilis	n.d	BS	Gram	NO	Bacillus sbtilis	MD	N/A	None	None	0	t	0.436	0	0.014	0.015	BSD-0.1%-	0.00694668	0.0210921	-0.147	-0.15	0	-0.001
749	CuOBSN/AAmpicillin	3.58744	10.1307	2.18293	0.973076	0.99996	0.898706	CHEMBL174	CuO	BS	N/A	Ampicillin	IZ mm	1	5	MIC (uM)	Bacillus subtilis	n.d	BS	Gram	NO	Bacillus sbtilis	MD	N/A	None	None	0	t	0.507	0	0.014	0.015	BSD-0.1%-	0.00694668	0.0210921	-0.147	-0.15	0	-0.001
750	CuOBSN/AAmpicillin	3.58744	10.1307	2.18293	0.973076	0.99996	0.898706	CHEMBL174	CuO	BS	N/A	Ampicillin	IZ mm	1	5	MIC (uM)	Bacillus subtilis	n.d	BS	Gram	NO	Bacillus sbtilis	MD	N/A	None	None	0	t	0.507	0	0.014	0.015	BSD-0.1%-	0.00694668	0.0210921	-0.147	-0.15	0	-0.001
751	CuIBSN/AAmpicillin	4.00586	10.5491	2.60134	0.982117	0.999974	0.930948	CHEMBL174	CuI	BS	N/A	Ampicillin	MIC ug.mL-1	-1	50	MIC (uM)	Bacillus subtilis	ATCC6633	BS	Gram	NO	Bacillus subtilis	ATCC6633	N/A	None	None	0	t	0.424	0	0.014	0.015	BSD-0.1%-	0.00694668	0.0210921	-0.143	-0.15	-0.001	-0.001
752	CuIBSN/AAmpicillin	4.00586	10.5491	2.60134	0.982117	0.999974	0.930948	CHEMBL174	CuI	BS	N/A	Ampicillin	MIC ug.mL-1	-1	50	MIC (uM)	Bacillus subtilis	MTCC 441	BS	Gram	NO	Bacillus subtilis	ATCC6633	N/A	None	None	0	v	0.424	0	0.014	0.015	BSD-0.1%-	0.00694668	0.0210921	-0.143	-0.15	-0.001	-0.001
753	CuIBSN/AAmpicillin	4.00586	10.5491	2.60134	0.982117	0.999974	0.930948	CHEMBL174	CuI	BS	N/A	Ampicillin	MIC ug.mL-1	-1	50	MIC (uM)	Bacillus subtilis	n.d	BS	Gram	NO	Bacillus subtilis	ATCC6633	N/A	None	None	0	t	0.424	0	0.014	0.015	BSD-0.1%-	0.00694668	0.0210921	-0.143	-0.15	-0.001	-0.001
754	CuIBSN/AAmpicillin	4.00586	10.5491	2.60134	0.982117	0.999974	0.930948	CHEMBL174	CuI	BS	N/A	Ampicillin	MIC ug.mL-1	-1	50	MIC (uM)	Bacillus subtilis	n.d	BS	Gram	NO	Bacillus subtilis	ATCC6633	N/A	None	None	0	t	0.424	0	0.014	0.015	BSD-0.1%-	0.00694668	0.0210921	-0.143	-0.15	-0.001	-0.001
755	CuIBSN/AAmpicillin	4.47069	11.014	3.06618	0.98869	0.999984	0.955476	CHEMBL174	CuI	BS	N/A	Ampicillin	IZ mm	1	5	MIC (uM)	Bacillus subtilis	n.d	BS	Gram	NO	Bacillus subtilis	ATCC6633	N/A	None	None	0	v	0.507	0	0.014	0.015	BSD-0.1%-	0.00694668	0.0210921	-0.143	-0.15	-0.001	-0.001
756	CuIBSN/AAmpicillin	4.47069	11.014	3.06618	0.98869	0.999984	0.955476	CHEMBL174	CuI	BS	N/A	Ampicillin	IZ mm	1	5	MIC (uM)	Bacillus subtilis	n.d	BS	Gram	NO	Bacillus subtilis	ATCC6633	N/A	None	None	0	t	0.507	0	0.014	0.015	BSD-0.1%-	0.00694668	0.0210921	-0.143	-0.15	-0.001	-0.001
757	CuIBSN/AAmpicillin	2.85217	9.39543	1.44766	0.945431	0.999917	0.809638	CHEMBL174	CuI	BS	N/A	Ampicillin	Inhibition mm	1	11.686	MIC (uM)	Bacillus subtilis	n.d	BS	Gram	NO	Bacillus subtilis	ATCC6633	N/A	None	None	0	t	0.218	0	0.014	0.015	BSD-0.1%-	0.00694668	0.0210921	-0.143	-0.15	-0.001	-0.001
758	CuIBSN/AAmpicillin	4.00586	10.5491	2.60134	0.982117	0.999974	0.930948	CHEMBL174	CuI	BS	N/A	Ampicillin	MIC ug.mL-1	-1	50	MIC (uM)	Bacillus subtilis	NCIM 2063	BS	Gram	NO	Bacillus subtilis	ATCC6633	N/A	None	None	0	t	0.424	0	0.014	0.015	BSD-0.1%-	0.00694668	0.0210921	-0.143	-0.15	-0.001	-0.001
759	CuOBSN/AAmpicillin	3.58744	10.1307	2.18293	0.973076	0.99996	0.898706	CHEMBL174	CuO	BS	N/A	Ampicillin	IZ mm	1	5	MIC (uM)	Bacillus subtilis	ATCC6051	BS	Gram	NO	Bacillus sbtilis	MD	N/A	None	None	0	t	0.507	0	0.014	0.015	BSD-0.1%-	0.00694668	0.0210921	-0.147	-0.15	0	-0.001
760	CuOBSN/AAmpicillin	3.12261	9.66587	1.71809	0.957816	0.999937	0.847883	CHEMBL174	CuO	BS	N/A	Ampicillin	MIC ug.mL-1	-1	50	MIC (uM)	Bacillus subtilis	ATCC6633	BS	Gram	NO	Bacillus sbtilis	MD	N/A	None	None	0	t	0.424	0	0.014	0.015	BSD-0.1%-	0.00694668	0.0210921	-0.147	-0.15	0	-0.001
761	CuOBSN/AAmpicillin	3.56147	10.1047	2.15695	0.972387	0.999959	0.896317	CHEMBL174	CuO	BS	N/A	Ampicillin	IZ mm	1	5	MIC (uM)	Bacillus subtilis	IFO 3007	BS	Gram	NO	Bacillus sbtilis	MD	N/A	None	None	0	t	0.507	0	0.014	0.015	BSD-0.1%-	0.00694668	0.0210921	-0.147	-0.15	0	-0.002
762	CuOBSN/AAmpicillin	3.12261	9.66587	1.71809	0.957816	0.999937	0.847883	CHEMBL174	CuO	BS	N/A	Ampicillin	MIC ug.mL-1	-1	50	MIC (uM)	Bacillus subtilis	MTCC 441	BS	Gram	NO	Bacillus sbtilis	MD	N/A	None	None	0	v	0.424	0	0.014	0.015	BSD-0.1%-	0.00694668	0.0210921	-0.147	-0.15	0	-0.001
763	CuOBSN/AAmpicillin	3.12261	9.66587	1.71809	0.957816	0.999937	0.847883	CHEMBL174	CuO	BS	N/A	Ampicillin	MIC ug.mL-1	-1	50	MIC (uM)	Bacillus subtilis	n.d	BS	Gram	NO	Bacillus sbtilis	MD	N/A	None	None	0	t	0.424	0	0.014	0.015	BSD-0.1%-	0.00694668	0.0210921	-0.147	-0.15	0	-0.001
764	CuOBSN/AAmpicillin	3.12261	9.66587	1.71809	0.957816	0.999937	0.847883	CHEMBL174	CuO	BS	N/A	Ampicillin	MIC ug.mL-1	-1	50	MIC (uM)	Bacillus subtilis	n.d	BS	Gram	NO	Bacillus sbtilis	MD	N/A	None	None	0	v	0.424	0	0.014	0.015	BSD-0.1%-	0.00694668	0.0210921	-0.147	-0.15	0	-0.001
765	CuOBSN/AAmpicillin	3.18981	9.73307	1.7853	0.960449	0.999941	0.85635	CHEMBL174	CuO	BS	N/A	Ampicillin	MBC ug ml-1	-1	117.213	MIC (uM)	Bacillus subtilis	n.d	BS	Gram	NO	Bacillus sbtilis	MD	N/A	None	None	0	t	0.436	0	0.014	0.015	BSD-0.1%-	0.00694668	0.0210921	-0.147	-0.15	0	-0.001
766	CuOBSN/AAmpicillin	3.58744	10.1307	2.18293	0.973076	0.99996	0.898706	CHEMBL174	CuO	BS	N/A	Ampicillin	IZ mm	1	5	MIC (uM)	Bacillus subtilis	n.d	BS	Gram	NO	Bacillus sbtilis	MD	N/A	None	None	0	t	0.507	0	0.014	0.015	BSD-0.1%-	0.00694668	0.0210921	-0.147	-0.15	0	-0.001
767	CuOBSN/AAmpicillin	3.58744	10.1307	2.18293	0.973076	0.99996	0.898706	CHEMBL174	CuO	BS	N/A	Ampicillin	IZ mm	1	5	MIC (uM)	Bacillus subtilis	n.d	BS	Gram	NO	Bacillus sbtilis	MD	N/A	None	None	0	t	0.507	0	0.014	0.015	BSD-0.1%-	0.00694668	0.0210921	-0.147	-0.15	0	-0.001
768	CuOBSN/AAmpicillin	3.12261	9.66587	1.71809	0.957816	0.999937	0.847883	CHEMBL174	CuO	BS	N/A	Ampicillin	MIC ug.mL-1	-1	50	MIC (uM)	Bacillus subtilis	NCIM-2063	BS	Gram	NO	Bacillus sbtilis	MD	N/A	None	None	0	t	0.424	0	0.014	0.015	BSD-0.1%-	0.00694668	0.0210921	-0.147	-0.15	0	-0.001
769	CuOBSN/AAmpicillin	3.63939	10.1827	2.23487	0.974404	0.999962	0.903338	CHEMBL174	CuO	BS	N/A	Ampicillin	IZ mm	1	5	MIC (uM)	Bacillus subtilis	RSKK 240	BS	Gram	NO	Bacillus sbtilis	MD	N/A	None	None	0	t	0.507	0	0.014	0.015	BSD-0.1%-	0.00694668	0.0210921	-0.147	-0.15	0	0.001
770	CuOBSN/AAmpicillin	3.12261	9.66587	1.71809	0.957816	0.999937	0.847883	CHEMBL174	CuO	BS	N/A	Ampicillin	MIC ug.mL-1	-1	50	MIC (uM)	Bacillus subtilis	ATCC6633	BS	Gram	NO	Bacillus sbtilis	MD	N/A	None	None	0	v	0.424	0	0.014	0.015	BSD-0.1%-	0.00694668	0.0210921	-0.147	-0.15	0	-0.001
771	CuOBSN/AAmpicillin	3.12261	9.66587	1.71809	0.957816	0.999937	0.847883	CHEMBL174	CuO	BS	N/A	Ampicillin	MIC ug.mL-1	-1	50	MIC (uM)	Bacillus subtilis	MTCC 441	BS	Gram	NO	Bacillus sbtilis	MD	N/A	None	None	0	t	0.424	0	0.014	0.015	BSD-0.1%-	0.00694668	0.0210921	-0.147	-0.15	0	-0.001
772	CuOBSN/AAmpicillin	3.12261	9.66587	1.71809	0.957816	0.999937	0.847883	CHEMBL174	CuO	BS	N/A	Ampicillin	MIC ug.mL-1	-1	50	MIC (uM)	Bacillus subtilis	n.d	BS	Gram	NO	Bacillus sbtilis	MD	N/A	None	None	0	t	0.424	0	0.014	0.015	BSD-0.1%-	0.00694668	0.0210921	-0.147	-0.15	0	-0.001
773	CuOBSN/AAmpicillin	3.12261	9.66587	1.71809	0.957816	0.999937	0.847883	CHEMBL174	CuO	BS	N/A	Ampicillin	MIC ug.mL-1	-1	50	MIC (uM)	Bacillus subtilis	n.d	BS	Gram	NO	Bacillus sbtilis	MD	N/A	None	None	0	v	0.424	0	0.014	0.015	BSD-0.1%-	0.00694668	0.0210921	-0.147	-0.15	0	-0.001
774	CuOBSN/AAmpicillin	1.5937	8.13696	0.189182	0.831136	0.999708	0.547155	CHEMBL174	CuO	BS	N/A	Ampicillin	MIC nM	-1	2500	MIC (uM)	Bacillus subtilis	n.d	BS	Gram	NO	Bacillus sbtilis	MD	N/A	None	None	0	t	0.151	0	0.014	0.015	BSD-0.1%-	0.00694668	0.0210921	-0.147	-0.15	0	-0.001
775	CuOBSN/AAmpicillin	3.58744	10.1307	2.18293	0.973076	0.99996	0.898706	CHEMBL174	CuO	BS	N/A	Ampicillin	IZ mm	1	5	MIC (uM)	Bacillus subtilis	n.d	BS	Gram	NO	Bacillus sbtilis	MD	N/A	None	None	0	t	0.507	0	0.014	0.015	BSD-0.1%-	0.00694668	0.0210921	-0.147	-0.15	0	-0.001
776	CuOBSN/AAmpicillin	3.58744	10.1307	2.18293	0.973076	0.99996	0.898706	CHEMBL174	CuO	BS	N/A	Ampicillin	IZ mm	1	5	MIC (uM)	Bacillus subtilis	n.d	BS	Gram	NO	Bacillus sbtilis	MD	N/A	None	None	0	t	0.507	0	0.014	0.015	BSD-0.1%-	0.00694668	0.0210921	-0.147	-0.15	0	-0.001
777	CuOBSN/AAmpicillin	3.18981	9.73307	1.7853	0.960449	0.999941	0.85635	CHEMBL174	CuO	BS	N/A	Ampicillin	MBC ug ml-1	-1	117.213	MIC (uM)	Bacillus subtilis	NCIM-2063	BS	Gram	NO	Bacillus sbtilis	MD	N/A	None	None	0	v	0.436	0	0.014	0.015	BSD-0.1%-	0.00694668	0.0210921	-0.147	-0.15	0	-0.001
778	AuCJPDT/MelAmpicillin	12.3306	88.0569	6.52074	0.999996	1	0.99853	CHEMBL174	Au	CJ	PDT/Mel	Ampicillin	MIC50 ug.mL-1	-1	21.529	MBC (uM)	Campylobacter jejuni	n.d	CJ	Gram-	GIT	Staphylococcus aureus	MET-R	Spherical	Double	Monomer	0	t	0.373	0	0.079	0.081	CJD-0.1%-	0.00664007	0.0855047	-0.144	-0.093	0	0.001
779	CdOCJN/AAmpicillin	0.737239	76.4636	-5.07259	0.676392	1	0.00622716	CHEMBL174	CdO	CJ	N/A	Ampicillin	Activity %	1	70	MBC (uM)	Campylobacter jejuni	n.d	CJ	Gram-	GIT	Escherichia coli	K-12	Spherical	None	None	0	t	0.146	0	0.079	0.081	CJD-0.1%-	0.00664007	0.0855047	-0.147	-0.15	-0.001	0.001
780	AuCJPDTAmpicillin	6.53854	82.2649	0.728716	0.998555	1	0.674523	CHEMBL174	Au	CJ	PDT	Ampicillin	MIC ug.mL-1	-1	50	MIC (uM)	Campylobacter jejuni	n.d	CJ	Gram-	GIT	Acinetobacter baumannii	MDR	Spherical	Single	Monomer	0	t	0.424	0	0.079	0.081	CJD-0.1%-	0.00664007	0.0855047	-0.143	-0.134	-0.001	0.002
781	CuICJN/AAmpicillin	4.56011	80.2864	-1.24972	0.989647	1	0.222749	CHEMBL174	CuI	CJ	N/A	Ampicillin	MIC90 ug.mL-1	-1	34.891	MIC (uM)	Campylobacter jejuni	n.d	CJ	Gram-	GIT	Staphylococcus aureus	ATCC29737	N/A	None	None	0	t	0.452	0	0.079	0.081	CJD-0.1%-	0.00664007	0.0855047	-0.143	-0.15	-0.001	0.001
782	CuOCAN/AAmpicillin	1.28806	53.0208	0.343709	0.783818	1	0.585091	CHEMBL174	CuO	CA	N/A	Ampicillin	MIC90 ug.mL-1	-1	34.891	MBC (uM)	Clostridium acetobutylicum	n.d	CA	Gram	NO	Pseudomonas aeruginosa	MD	N/A	None	None	0	t	0.345	0	0.055	0.057	CAD-0.1%-	0.00825128	0.0631656	-0.147	-0.15	0	0.002
783	AgCALactoseAmpicillin	2.08892	53.8217	1.14457	0.889821	1	0.758517	CHEMBL174	Ag	CA	Lactose	Ampicillin	MIC50 ug.mL-1	-1	21.529	MIC (uM)	Clostridium acetobutylicum	n.d	CA	Gram	NO	Pseudomonas aeruginosa	MD	Spherical	Single	Monomer	0	t	0.488	0	0.055	0.057	CAD-0.1%-	0.00825128	0.0631656	-0.147	-0.15	0	0.002
784	CuOCAN/AAmpicillin	1.73049	53.4632	0.786142	0.849475	1	0.687002	CHEMBL174	CuO	CA	N/A	Ampicillin	MIC ug.mL-1	-1	50	MIC (uM)	Clostridium acetobutylicum	n.d	CA	Gram	NO	Pseudomonas aeruginosa	MD	N/A	None	None	0	v	0.424	0	0.055	0.057	CAD-0.1%-	0.00825128	0.0631656	-0.147	-0.15	0	0.002
785	ZnOEFN/AAmpicillin	2.34199	72.1528	-2.09202	0.912295	1	0.109875	CHEMBL174	ZnO	EF	N/A	Ampicillin	MIC 10'-2 umol/ml	-1	10.237	MBC (uM)	Enterococcus faecalis	ATCC7080	EF	Gram	GIT	Bacillus sbtilis	MD	N/A	None	None	0	t	0.313	0	0.073	0.075	EFD-0.1%-	0.00711082	0.0799971	-0.147	-0.15	0	0
786	ZnOEFN/AAmpicillin	2.5212	72.332	-1.9128	0.925615	1	0.128666	CHEMBL174	ZnO	EF	N/A	Ampicillin	MIC90 ug.mL-1	-1	34.891	MBC (uM)	Enterococcus faecalis	n.d	EF	Gram	GIT	Bacillus sbtilis	MD	N/A	None	None	0	t	0.345	0	0.073	0.075	EFD-0.1%-	0.00711082	0.0799971	-0.147	-0.15	0	0
787	ZnOEFN/AAmpicillin	2.67801	72.4889	-1.75599	0.935717	1	0.147293	CHEMBL174	ZnO	EF	N/A	Ampicillin	MIC50 ug.mL-1	-1	21.529	MBC (uM)	Enterococcus faecalis	n.d	EF	Gram	GIT	Bacillus sbtilis	MD	N/A	None	None	0	t	0.373	0	0.073	0.075	EFD-0.1%-	0.00711082	0.0799971	-0.147	-0.15	0	0
788	ZnOEFN/AAmpicillin	2.40359	72.2144	-2.03041	0.917101	1	0.116047	CHEMBL174	ZnO	EF	N/A	Ampicillin	MIC ug.mL-1	-1	50	MBC (uM)	Enterococcus faecalis	n.d	EF	Gram	GIT	Bacillus sbtilis	MD	N/A	None	None	0	v	0.324	0	0.073	0.075	EFD-0.1%-	0.00711082	0.0799971	-0.147	-0.15	0	0
789	ZnOEFN/AAmpicillin	2.4204	72.2312	-2.01361	0.918369	1	0.117781	CHEMBL174	ZnO	EF	N/A	Ampicillin	MBC 10'-2 umol/ml	-1	14.846	MBC (uM)	Enterococcus faecalis	n.d	EF	Gram	GIT	Bacillus sbtilis	MD	N/A	None	None	0	t	0.327	0	0.073	0.075	EFD-0.1%-	0.00711082	0.0799971	-0.147	-0.15	0	0
790	ZnOEFN/AAmpicillin	1.40672	71.2176	-3.02728	0.803248	1	0.0462084	CHEMBL174	ZnO	EF	N/A	Ampicillin	Activity %	1	70	MBC (uM)	Enterococcus faecalis	n.d	EF	Gram	GIT	Bacillus sbtilis	MD	N/A	None	None	0	v	0.146	0	0.073	0.075	EFD-0.1%-	0.00711082	0.0799971	-0.147	-0.15	0	0
791	CuOEFN/AAmpicillin	2.5212	72.332	-1.9128	0.925615	1	0.128666	CHEMBL174	CuO	EF	N/A	Ampicillin	MIC90 ug.mL-1	-1	34.891	MBC (uM)	Enterococcus faecalis	n.d	EF	Gram	GIT	Bacillus sbtilis	MD	N/A	None	None	0	t	0.345	0	0.073	0.075	EFD-0.1%-	0.00711082	0.0799971	-0.147	-0.15	0	0
792	CuOEFN/AAmpicillin	2.67801	72.4889	-1.75599	0.935717	1	0.147293	CHEMBL174	CuO	EF	N/A	Ampicillin	MIC50 ug.mL-1	-1	21.529	MBC (uM)	Enterococcus faecalis	n.d	EF	Gram	GIT	Bacillus sbtilis	MD	N/A	None	None	0	t	0.373	0	0.073	0.075	EFD-0.1%-	0.00711082	0.0799971	-0.147	-0.15	0	0
793	CuOEFN/AAmpicillin	2.40359	72.2144	-2.03041	0.917101	1	0.116047	CHEMBL174	CuO	EF	N/A	Ampicillin	MIC ug.mL-1	-1	50	MBC (uM)	Enterococcus faecalis	n.d	EF	Gram	GIT	Bacillus sbtilis	MD	N/A	None	None	0	v	0.324	0	0.073	0.075	EFD-0.1%-	0.00711082	0.0799971	-0.147	-0.15	0	0
794	CuOEFN/AAmpicillin	2.40359	72.2144	-2.03041	0.917101	1	0.116047	CHEMBL174	CuO	EF	N/A	Ampicillin	MIC ug.mL-1	-1	50	MBC (uM)	Enterococcus faecalis	n.d	EF	Gram	GIT	Bacillus sbtilis	MD	N/A	None	None	0	t	0.324	0	0.073	0.075	EFD-0.1%-	0.00711082	0.0799971	-0.147	-0.15	0	0
795	CuOEFN/AAmpicillin	2.40359	72.2144	-2.03041	0.917101	1	0.116047	CHEMBL174	CuO	EF	N/A	Ampicillin	MIC ug.mL-1	-1	50	MBC (uM)	Enterococcus faecalis	n.d	EF	Gram	GIT	Bacillus sbtilis	MD	N/A	None	None	0	t	0.324	0	0.073	0.075	EFD-0.1%-	0.00711082	0.0799971	-0.147	-0.15	0	0
796	CuOEFN/AAmpicillin	2.4204	72.2312	-2.01361	0.918369	1	0.117781	CHEMBL174	CuO	EF	N/A	Ampicillin	MBC 10'-2 umol/ml	-1	14.846	MBC (uM)	Enterococcus faecalis	n.d	EF	Gram	GIT	Bacillus sbtilis	MD	N/A	None	None	0	t	0.327	0	0.073	0.075	EFD-0.1%-	0.00711082	0.0799971	-0.147	-0.15	0	0
797	CuOEFN/AAmpicillin	2.76202	72.5729	-1.67198	0.940589	1	0.15816	CHEMBL174	CuO	EF	N/A	Ampicillin	IZ mm	1	5	MBC (uM)	Enterococcus faecalis	n.d	EF	Gram	GIT	Bacillus sbtilis	MD	N/A	None	None	0	v	0.388	0	0.073	0.075	EFD-0.1%-	0.00711082	0.0799971	-0.147	-0.15	0	0
798	CuOEFN/AAmpicillin	1.40672	71.2176	-3.02728	0.803248	1	0.0462084	CHEMBL174	CuO	EF	N/A	Ampicillin	Activity %	1	70	MBC (uM)	Enterococcus faecalis	n.d	EF	Gram	GIT	Bacillus sbtilis	MD	N/A	None	None	0	t	0.146	0	0.073	0.075	EFD-0.1%-	0.00711082	0.0799971	-0.147	-0.15	0	0
799	Fe2O3EFN/AAmpicillin	2.5212	72.332	-1.9128	0.925615	1	0.128666	CHEMBL174	Fe2O3	EF	N/A	Ampicillin	MIC90 ug.mL-1	-1	34.891	MBC (uM)	Enterococcus faecalis	n.d	EF	Gram	GIT	Bacillus sbtilis	MD	N/A	None	None	0	t	0.345	0	0.073	0.075	EFD-0.1%-	0.00711082	0.0799971	-0.147	-0.15	0	0
800	Fe2O3EFN/AAmpicillin	2.67801	72.4889	-1.75599	0.935717	1	0.147293	CHEMBL174	Fe2O3	EF	N/A	Ampicillin	MIC50 ug.mL-1	-1	21.529	MBC (uM)	Enterococcus faecalis	n.d	EF	Gram	GIT	Bacillus sbtilis	MD	N/A	None	None	0	v	0.373	0	0.073	0.075	EFD-0.1%-	0.00711082	0.0799971	-0.147	-0.15	0	0
801	Fe2O3EFN/AAmpicillin	2.40359	72.2144	-2.03041	0.917101	1	0.116047	CHEMBL174	Fe2O3	EF	N/A	Ampicillin	MIC ug.mL-1	-1	50	MBC (uM)	Enterococcus faecalis	n.d	EF	Gram	GIT	Bacillus sbtilis	MD	N/A	None	None	0	t	0.324	0	0.073	0.075	EFD-0.1%-	0.00711082	0.0799971	-0.147	-0.15	0	0
802	Fe2O3EFN/AAmpicillin	2.40359	72.2144	-2.03041	0.917101	1	0.116047	CHEMBL174	Fe2O3	EF	N/A	Ampicillin	MIC ug.mL-1	-1	50	MBC (uM)	Enterococcus faecalis	n.d	EF	Gram	GIT	Bacillus sbtilis	MD	N/A	None	None	0	t	0.324	0	0.073	0.075	EFD-0.1%-	0.00711082	0.0799971	-0.147	-0.15	0	0
803	Fe2O3EFN/AAmpicillin	2.76202	72.5729	-1.67198	0.940589	1	0.15816	CHEMBL174	Fe2O3	EF	N/A	Ampicillin	IZ mm	1	5	MBC (uM)	Enterococcus faecalis	n.d	EF	Gram	GIT	Bacillus sbtilis	MD	N/A	None	None	0	v	0.388	0	0.073	0.075	EFD-0.1%-	0.00711082	0.0799971	-0.147	-0.15	0	0
804	Fe2O3EFN/AAmpicillin	1.40672	71.2176	-3.02728	0.803248	1	0.0462084	CHEMBL174	Fe2O3	EF	N/A	Ampicillin	Activity %	1	70	MBC (uM)	Enterococcus faecalis	n.d	EF	Gram	GIT	Bacillus sbtilis	MD	N/A	None	None	0	t	0.146	0	0.073	0.075	EFD-0.1%-	0.00711082	0.0799971	-0.147	-0.15	0	0
805	Fe2O3EFN/AAmpicillin	2.6841	72.4949	-1.74991	0.936082	1	0.148059	CHEMBL174	Fe2O3	EF	N/A	Ampicillin	IZ mm	1	5	MBC (uM)	Enterococcus faecalis	UFPEDA 138	EF	Gram	GIT	Bacillus sbtilis	MD	N/A	None	None	0	v	0.388	0	0.073	0.075	EFD-0.1%-	0.00711082	0.0799971	-0.147	-0.15	0	-0.003
806	AgEFN/AAmpicillin	3.15514	72.966	-1.27886	0.959111	1	0.217744	CHEMBL174	Ag	EF	N/A	Ampicillin	MIC ug.mL-1	-1	50	MBC (uM)	Enterococcus faecalis	ATCC29212	EF	Gram	GIT	Bacillus subtilis	ATCC6633	Spherical	None	None	0	t	0.324	0	0.073	0.075	EFD-0.1%-	0.00711082	0.0799971	-0.147	-0.135	-0.001	0
807	AgEFN/AAmpicillin	3.07722	72.8881	-1.35678	0.955943	1	0.204764	CHEMBL174	Ag	EF	N/A	Ampicillin	MIC ug.mL-1	-1	50	MBC (uM)	Enterococcus faecalis	H.C. 24962	EF	Gram	GIT	Bacillus subtilis	ATCC6633	Spherical	None	None	0	t	0.324	0	0.073	0.075	EFD-0.1%-	0.00711082	0.0799971	-0.147	-0.135	-0.001	-0.003
808	AgEFN/AAmpicillin	3.27275	73.0836	-1.16125	0.963482	1	0.238439	CHEMBL174	Ag	EF	N/A	Ampicillin	MIC90 ug.mL-1	-1	34.891	MBC (uM)	Enterococcus faecalis	n.d	EF	Gram	GIT	Bacillus subtilis	ATCC6633	Spherical	None	None	0	v	0.345	0	0.073	0.075	EFD-0.1%-	0.00711082	0.0799971	-0.147	-0.135	-0.001	0
809	AgEFN/AAmpicillin	3.15514	72.966	-1.27886	0.959111	1	0.217744	CHEMBL174	Ag	EF	N/A	Ampicillin	MIC ug.mL-1	-1	50	MBC (uM)	Enterococcus faecalis	n.d	EF	Gram	GIT	Bacillus subtilis	ATCC6633	Spherical	None	None	0	t	0.324	0	0.073	0.075	EFD-0.1%-	0.00711082	0.0799971	-0.147	-0.135	-0.001	0
810	AgEFN/AAmpicillin	3.09354	72.9044	-1.34047	0.956625	1	0.207433	CHEMBL174	Ag	EF	N/A	Ampicillin	MIC 10'-2 umol/ml	-1	10.237	MBC (uM)	Enterococcus faecalis	n.d	EF	Gram	GIT	Bacillus subtilis	ATCC6633	Spherical	None	None	0	t	0.313	0	0.073	0.075	EFD-0.1%-	0.00711082	0.0799971	-0.147	-0.135	-0.001	0
811	AgEFN/AAmpicillin	2.15827	71.9691	-2.27574	0.896439	1	0.0931526	CHEMBL174	Ag	EF	N/A	Ampicillin	Activity %	1	70	MBC (uM)	Enterococcus faecalis	n.d	EF	Gram	GIT	Bacillus subtilis	ATCC6633	Spherical	None	None	0	v	0.146	0	0.073	0.075	EFD-0.1%-	0.00711082	0.0799971	-0.147	-0.135	-0.001	0
812	AgEFN/AAmpicillin	2.15827	71.9691	-2.27574	0.896439	1	0.0931526	CHEMBL174	Ag	EF	N/A	Ampicillin	Activity %	1	70	MBC (uM)	Enterococcus faecalis	n.d	EF	Gram	GIT	Bacillus subtilis	ATCC6633	Spherical	None	None	0	t	0.146	0	0.073	0.075	EFD-0.1%-	0.00711082	0.0799971	-0.147	-0.135	-0.001	0
813	CuOEFN/AAmpicillin	2.40359	72.2144	-2.03041	0.917101	1	0.116047	CHEMBL174	CuO	EF	N/A	Ampicillin	MIC ug.mL-1	-1	50	MBC (uM)	Enterococcus faecalis	n.d	EF	Gram	GIT	Bacillus sbtilis	MD	N/A	None	None	0	v	0.324	0	0.073	0.075	EFD-0.1%-	0.00711082	0.0799971	-0.147	-0.15	0	0
814	CuOEFN/AAmpicillin	0.605863	70.4167	-3.82814	0.646997	1	0.021287	CHEMBL174	CuO	EF	N/A	Ampicillin	IC50 ug.mL-1	1	2000	MBC (uM)	Enterococcus faecalis	n.d	EF	Gram	GIT	Bacillus sbtilis	MD	N/A	None	None	0	t	0.003	0	0.073	0.075	EFD-0.1%-	0.00711082	0.0799971	-0.147	-0.15	0	0
815	CuOEFN/AAmpicillin	1.40672	71.2176	-3.02728	0.803248	1	0.0462084	CHEMBL174	CuO	EF	N/A	Ampicillin	Activity %	1	70	MBC (uM)	Enterococcus faecalis	n.d	EF	Gram	GIT	Bacillus sbtilis	MD	N/A	None	None	0	t	0.146	0	0.073	0.075	EFD-0.1%-	0.00711082	0.0799971	-0.147	-0.15	0	0
816	CuEFN/AAmpicillin	1.53613	71.347	-2.89788	0.822901	1	0.0522585	CHEMBL174	Cu	EF	N/A	Ampicillin	IZ mm	1	5	MBC (uM)	Enterococcus faecalis	ATCC29212	EF	Gram	GIT	Bacillus subtilis	ATCC6633	Spherical	None	None	0	t	0.388	0	0.073	0.075	EFD-0.1%-	0.00711082	0.0799971	-0.147	-0.15	-0.001	0
817	CuEFN/AAmpicillin	1.09978	70.9106	-3.33423	0.750219	1	0.0344155	CHEMBL174	Cu	EF	N/A	Ampicillin	MIC ug.mL-1	-1	50	MBC (uM)	Enterococcus faecalis	H.C. 24708	EF	Gram	GIT	Bacillus subtilis	ATCC6633	Spherical	None	None	0	v	0.324	0	0.073	0.075	EFD-0.1%-	0.00711082	0.0799971	-0.147	-0.15	-0.001	-0.003
818	CuEFN/AAmpicillin	1.12575	70.9366	-3.30825	0.755054	1	0.0352891	CHEMBL174	Cu	EF	N/A	Ampicillin	MIC ug.mL-1	-1	50	MBC (uM)	Enterococcus faecalis	I	EF	Gram	GIT	Bacillus subtilis	ATCC6633	Spherical	None	None	0	t	0.324	0	0.073	0.075	EFD-0.1%-	0.00711082	0.0799971	-0.147	-0.15	-0.001	-0.002
819	CuEFN/AAmpicillin	1.29531	71.1061	-3.1387	0.785044	1	0.0415389	CHEMBL174	Cu	EF	N/A	Ampicillin	MIC90 ug.mL-1	-1	34.891	MBC (uM)	Enterococcus faecalis	n.d	EF	Gram	GIT	Bacillus subtilis	ATCC6633	Spherical	None	None	0	t	0.345	0	0.073	0.075	EFD-0.1%-	0.00711082	0.0799971	-0.147	-0.15	-0.001	0
820	CuEFN/AAmpicillin	1.45212	71.263	-2.98189	0.810324	1	0.0482509	CHEMBL174	Cu	EF	N/A	Ampicillin	MIC50 ug.mL-1	-1	21.529	MBC (uM)	Enterococcus faecalis	n.d	EF	Gram	GIT	Bacillus subtilis	ATCC6633	Spherical	None	None	0	t	0.373	0	0.073	0.075	EFD-0.1%-	0.00711082	0.0799971	-0.147	-0.15	-0.001	0
821	CuEFN/AAmpicillin	1.1777	70.9885	-3.25631	0.764534	1	0.0371009	CHEMBL174	Cu	EF	N/A	Ampicillin	MIC ug.mL-1	-1	50	MBC (uM)	Enterococcus faecalis	n.d	EF	Gram	GIT	Bacillus subtilis	ATCC6633	Spherical	None	None	0	t	0.324	0	0.073	0.075	EFD-0.1%-	0.00711082	0.0799971	-0.147	-0.15	-0.001	0
822	CuEFN/AAmpicillin	1.11609	70.9269	-3.31791	0.753264	1	0.0349618	CHEMBL174	Cu	EF	N/A	Ampicillin	MIC 10'-2 umol/ml	-1	10.237	MBC (uM)	Enterococcus faecalis	n.d	EF	Gram	GIT	Bacillus subtilis	ATCC6633	Spherical	None	None	0	t	0.313	0	0.073	0.075	EFD-0.1%-	0.00711082	0.0799971	-0.147	-0.15	-0.001	0
823	CuEFN/AAmpicillin	0.180827	69.9917	-4.25318	0.545084	1	0.0140196	CHEMBL174	Cu	EF	N/A	Ampicillin	Activity %	1	70	MBC (uM)	Enterococcus faecalis	n.d	EF	Gram	GIT	Bacillus subtilis	ATCC6633	Spherical	None	None	0	t	0.146	0	0.073	0.075	EFD-0.1%-	0.00711082	0.0799971	-0.147	-0.15	-0.001	0
824	CuOEFN/AAmpicillin	2.35165	72.1625	-2.08236	0.913065	1	0.110823	CHEMBL174	CuO	EF	N/A	Ampicillin	MIC ug.mL-1	-1	50	MBC (uM)	Enterococcus faecalis	ATCC33186	EF	Gram	GIT	Bacillus sbtilis	MD	N/A	None	None	0	t	0.324	0	0.073	0.075	EFD-0.1%-	0.00711082	0.0799971	-0.147	-0.15	0	-0.002
825	CuOEFN/AAmpicillin	2.40359	72.2144	-2.03041	0.917101	1	0.116047	CHEMBL174	CuO	EF	N/A	Ampicillin	MIC ug.mL-1	-1	50	MBC (uM)	Enterococcus faecalis	n.d	EF	Gram	GIT	Bacillus sbtilis	MD	N/A	None	None	0	t	0.324	0	0.073	0.075	EFD-0.1%-	0.00711082	0.0799971	-0.147	-0.15	0	0
826	CuOEFN/AAmpicillin	1.40672	71.2176	-3.02728	0.803248	1	0.0462084	CHEMBL174	CuO	EF	N/A	Ampicillin	Activity %	1	70	MBC (uM)	Enterococcus faecalis	n.d	EF	Gram	GIT	Bacillus sbtilis	MD	N/A	None	None	0	v	0.146	0	0.073	0.075	EFD-0.1%-	0.00711082	0.0799971	-0.147	-0.15	0	0
827	CuOEFN/AAmpicillin	2.32567	72.1365	-2.10833	0.910981	1	0.10829	CHEMBL174	CuO	EF	N/A	Ampicillin	MIC ug.mL-1	-1	50	MBC (uM)	Enterococcus faecalis	UFPEDA 138	EF	Gram	GIT	Bacillus sbtilis	MD	N/A	None	None	0	t	0.324	0	0.073	0.075	EFD-0.1%-	0.00711082	0.0799971	-0.147	-0.15	0	-0.003
828	CuIEFN/AAmpicillin	2.11636	71.9272	-2.31765	0.892483	1	0.0896719	CHEMBL174	CuI	EF	N/A	Ampicillin	MIC nM	-1	2500	MBC (uM)	Enterococcus faecalis	ATCC29212	EF	Gram	GIT	Bacillus subtilis	ATCC6633	N/A	None	None	0	v	0.115	0	0.073	0.075	EFD-0.1%-	0.00711082	0.0799971	-0.143	-0.15	-0.001	0
829	CuIEFN/AAmpicillin	3.20892	73.0198	-1.22508	0.961169	1	0.227043	CHEMBL174	CuI	EF	N/A	Ampicillin	MIC ug.mL-1	-1	50	MBC (uM)	Enterococcus faecalis	H.C. 21944	EF	Gram	GIT	Bacillus subtilis	ATCC6633	N/A	None	None	0	t	0.324	0	0.073	0.075	EFD-0.1%-	0.00711082	0.0799971	-0.143	-0.15	-0.001	-0.003
830	CuIEFN/AAmpicillin	3.40445	73.2153	-1.02955	0.967843	1	0.263171	CHEMBL174	CuI	EF	N/A	Ampicillin	MIC90 ug.mL-1	-1	34.891	MBC (uM)	Enterococcus faecalis	n.d	EF	Gram	GIT	Bacillus subtilis	ATCC6633	N/A	None	None	0	v	0.345	0	0.073	0.075	EFD-0.1%-	0.00711082	0.0799971	-0.143	-0.15	-0.001	0
831	CuIEFN/AAmpicillin	3.56126	73.3721	-0.872742	0.972382	1	0.294684	CHEMBL174	CuI	EF	N/A	Ampicillin	MIC50 ug.mL-1	-1	21.529	MBC (uM)	Enterococcus faecalis	n.d	EF	Gram	GIT	Bacillus subtilis	ATCC6633	N/A	None	None	0	t	0.373	0	0.073	0.075	EFD-0.1%-	0.00711082	0.0799971	-0.143	-0.15	-0.001	0
832	CuIEFN/AAmpicillin	3.28684	73.0977	-1.14716	0.963975	1	0.241008	CHEMBL174	CuI	EF	N/A	Ampicillin	MIC ug.mL-1	-1	50	MBC (uM)	Enterococcus faecalis	n.d	EF	Gram	GIT	Bacillus subtilis	ATCC6633	N/A	None	None	0	t	0.324	0	0.073	0.075	EFD-0.1%-	0.00711082	0.0799971	-0.143	-0.15	-0.001	0
833	CuIEFN/AAmpicillin	2.28997	72.1008	-2.14404	0.908043	1	0.10489	CHEMBL174	CuI	EF	N/A	Ampicillin	Activity %	1	70	MBC (uM)	Enterococcus faecalis	n.d	EF	Gram	GIT	Bacillus subtilis	ATCC6633	N/A	None	None	0	v	0.146	0	0.073	0.075	EFD-0.1%-	0.00711082	0.0799971	-0.143	-0.15	-0.001	0
834	CuOEFN/AAmpicillin	2.40359	72.2144	-2.03041	0.917101	1	0.116047	CHEMBL174	CuO	EF	N/A	Ampicillin	MIC ug.mL-1	-1	50	MBC (uM)	Enterococcus faecalis	n.d	EF	Gram	GIT	Bacillus sbtilis	MD	N/A	None	None	0	t	0.324	0	0.073	0.075	EFD-0.1%-	0.00711082	0.0799971	-0.147	-0.15	0	0
835	CuOEFN/AAmpicillin	1.40672	71.2176	-3.02728	0.803248	1	0.0462084	CHEMBL174	CuO	EF	N/A	Ampicillin	Activity %	1	70	MBC (uM)	Enterococcus faecalis	n.d	EF	Gram	GIT	Bacillus sbtilis	MD	N/A	None	None	0	v	0.146	0	0.073	0.075	EFD-0.1%-	0.00711082	0.0799971	-0.147	-0.15	0	0
836	CuOEFN/AAmpicillin	2.11797	71.9288	-2.31603	0.892638	1	0.0898039	CHEMBL174	CuO	EF	N/A	Ampicillin	MBC99.5 10'-2 umol/ml	-1	29.399	MBC (uM)	Enterococcus faecalis	ATCC7080	EF	Gram	GIT	Bacillus sbtilis	MD	N/A	None	None	0	t	0.273	0	0.073	0.075	EFD-0.1%-	0.00711082	0.0799971	-0.147	-0.15	0	0
837	CuOEFN/AAmpicillin	2.40359	72.2144	-2.03041	0.917101	1	0.116047	CHEMBL174	CuO	EF	N/A	Ampicillin	MIC ug.mL-1	-1	50	MBC (uM)	Enterococcus faecalis	n.d	EF	Gram	GIT	Bacillus sbtilis	MD	N/A	None	None	0	v	0.324	0	0.073	0.075	EFD-0.1%-	0.00711082	0.0799971	-0.147	-0.15	0	0
838	CuOEFN/AAmpicillin	1.40672	71.2176	-3.02728	0.803248	1	0.0462084	CHEMBL174	CuO	EF	N/A	Ampicillin	Activity %	1	70	MBC (uM)	Enterococcus faecalis	n.d	EF	Gram	GIT	Bacillus sbtilis	MD	N/A	None	None	0	t	0.146	0	0.073	0.075	EFD-0.1%-	0.00711082	0.0799971	-0.147	-0.15	0	0
839	CuEFN/AAmpicillin	1.73774	71.5486	-2.69627	0.8504	1	0.0631941	CHEMBL174	Cu	EF	N/A	Ampicillin	MIC ug.mL-1	-1	50	MIC (uM)	Enterococcus faecalis	ATCC29212	EF	Gram	GIT	Bacillus subtilis	ATCC6633	Spherical	None	None	0	t	0.424	0	0.073	0.075	EFD-0.1%-	0.00711082	0.0799971	-0.147	-0.15	-0.001	0
840	CuEFN/AAmpicillin	1.65982	71.4707	-2.77419	0.840214	1	0.0587352	CHEMBL174	Cu	EF	N/A	Ampicillin	MIC ug.mL-1	-1	50	MIC (uM)	Enterococcus faecalis	H.C. 21752	EF	Gram	GIT	Bacillus subtilis	ATCC6633	Spherical	None	None	0	v	0.424	0	0.073	0.075	EFD-0.1%-	0.00711082	0.0799971	-0.147	-0.15	-0.001	-0.003
841	CuEFN/AAmpicillin	1.89455	71.7054	-2.53945	0.869274	1	0.0731382	CHEMBL174	Cu	EF	N/A	Ampicillin	MIC90 ug.mL-1	-1	34.891	MIC (uM)	Enterococcus faecalis	n.d	EF	Gram	GIT	Bacillus subtilis	ATCC6633	Spherical	None	None	0	t	0.452	0	0.073	0.075	EFD-0.1%-	0.00711082	0.0799971	-0.147	-0.15	-0.001	0
842	CuEFN/AAmpicillin	2.09617	71.907	-2.33784	0.89053	1	0.0880373	CHEMBL174	Cu	EF	N/A	Ampicillin	MIC50 ug.mL-1	-1	21.529	MIC (uM)	Enterococcus faecalis	n.d	EF	Gram	GIT	Bacillus subtilis	ATCC6633	Spherical	None	None	0	t	0.488	0	0.073	0.075	EFD-0.1%-	0.00711082	0.0799971	-0.147	-0.15	-0.001	0
843	CuEFN/AAmpicillin	1.73774	71.5486	-2.69627	0.8504	1	0.0631941	CHEMBL174	Cu	EF	N/A	Ampicillin	MIC ug.mL-1	-1	50	MIC (uM)	Enterococcus faecalis	n.d	EF	Gram	GIT	Bacillus subtilis	ATCC6633	Spherical	None	None	0	t	0.424	0	0.073	0.075	EFD-0.1%-	0.00711082	0.0799971	-0.147	-0.15	-0.001	0
844	CuEFN/AAmpicillin	0.432845	70.2437	-4.00116	0.606553	1	0.0179657	CHEMBL174	Cu	EF	N/A	Ampicillin	Activity %	1	70	MIC (uM)	Enterococcus faecalis	n.d	EF	Gram	GIT	Bacillus subtilis	ATCC6633	Spherical	None	None	0	t	0.191	0	0.073	0.075	EFD-0.1%-	0.00711082	0.0799971	-0.147	-0.15	-0.001	0
845	AgEFN/AAmpicillin	3.872	73.6828	-0.56201	0.979608	1	0.363082	CHEMBL174	Ag	EF	N/A	Ampicillin	MIC90 ug.mL-1	-1	34.891	MIC (uM)	Enterococcus faecalis	n.d	EF	Gram	GIT	Bacillus subtilis	ATCC6633	Spherical	None	None	0	v	0.452	0	0.073	0.075	EFD-0.1%-	0.00711082	0.0799971	-0.147	-0.135	-0.001	0
846	AgEFN/AAmpicillin	4.07361	73.8844	-0.360396	0.983269	1	0.410864	CHEMBL174	Ag	EF	N/A	Ampicillin	MIC50 ug.mL-1	-1	21.529	MIC (uM)	Enterococcus faecalis	n.d	EF	Gram	GIT	Bacillus subtilis	ATCC6633	Spherical	None	None	0	t	0.488	0	0.073	0.075	EFD-0.1%-	0.00711082	0.0799971	-0.147	-0.135	-0.001	0
847	AgEFN/AAmpicillin	3.71518	73.526	-0.718822	0.976228	1	0.327652	CHEMBL174	Ag	EF	N/A	Ampicillin	MIC ug.mL-1	-1	50	MIC (uM)	Enterococcus faecalis	n.d	EF	Gram	GIT	Bacillus subtilis	ATCC6633	Spherical	None	None	0	t	0.424	0	0.073	0.075	EFD-0.1%-	0.00711082	0.0799971	-0.147	-0.135	-0.001	0
848	AgEFN/AAmpicillin	3.71518	73.526	-0.718822	0.976228	1	0.327652	CHEMBL174	Ag	EF	N/A	Ampicillin	MIC ug.mL-1	-1	50	MIC (uM)	Enterococcus faecalis	n.d	EF	Gram	GIT	Bacillus subtilis	ATCC6633	Spherical	None	None	0	v	0.424	0	0.073	0.075	EFD-0.1%-	0.00711082	0.0799971	-0.147	-0.135	-0.001	0
849	AgEFN/AAmpicillin	2.41029	72.2211	-2.02372	0.917608	1	0.116735	CHEMBL174	Ag	EF	N/A	Ampicillin	Activity %	1	70	MIC (uM)	Enterococcus faecalis	n.d	EF	Gram	GIT	Bacillus subtilis	ATCC6633	Spherical	None	None	0	t	0.191	0	0.073	0.075	EFD-0.1%-	0.00711082	0.0799971	-0.147	-0.135	-0.001	0
850	CuOEFN/AAmpicillin	3.12045	72.9313	-1.31356	0.957728	1	0.211892	CHEMBL174	CuO	EF	N/A	Ampicillin	MIC90 ug.mL-1	-1	34.891	MIC (uM)	Enterococcus faecalis	n.d	EF	Gram	GIT	Bacillus sbtilis	MD	N/A	None	None	0	t	0.452	0	0.073	0.075	EFD-0.1%-	0.00711082	0.0799971	-0.147	-0.15	0	0
851	CuOEFN/AAmpicillin	2.96364	72.7745	-1.47037	0.950904	1	0.186886	CHEMBL174	CuO	EF	N/A	Ampicillin	MIC ug.mL-1	-1	50	MIC (uM)	Enterococcus faecalis	n.d	EF	Gram	GIT	Bacillus sbtilis	MD	N/A	None	None	0	v	0.424	0	0.073	0.075	EFD-0.1%-	0.00711082	0.0799971	-0.147	-0.15	0	0
852	CuOEFN/AAmpicillin	2.96364	72.7745	-1.47037	0.950904	1	0.186886	CHEMBL174	CuO	EF	N/A	Ampicillin	MIC ug.mL-1	-1	50	MIC (uM)	Enterococcus faecalis	n.d	EF	Gram	GIT	Bacillus sbtilis	MD	N/A	None	None	0	t	0.424	0	0.073	0.075	EFD-0.1%-	0.00711082	0.0799971	-0.147	-0.15	0	0
853	CuOEFN/AAmpicillin	1.65874	71.4696	-2.77527	0.840069	1	0.0586755	CHEMBL174	CuO	EF	N/A	Ampicillin	Activity %	1	70	MIC (uM)	Enterococcus faecalis	n.d	EF	Gram	GIT	Bacillus sbtilis	MD	N/A	None	None	0	t	0.191	0	0.073	0.075	EFD-0.1%-	0.00711082	0.0799971	-0.147	-0.15	0	0
854	CuOEFN/AAmpicillin	3.12045	72.9313	-1.31356	0.957728	1	0.211892	CHEMBL174	CuO	EF	N/A	Ampicillin	MIC90 ug.mL-1	-1	34.891	MIC (uM)	Enterococcus faecalis	n.d	EF	Gram	GIT	Bacillus sbtilis	MD	N/A	None	None	0	v	0.452	0	0.073	0.075	EFD-0.1%-	0.00711082	0.0799971	-0.147	-0.15	0	0
855	CuOEFN/AAmpicillin	2.96364	72.7745	-1.47037	0.950904	1	0.186886	CHEMBL174	CuO	EF	N/A	Ampicillin	MIC ug.mL-1	-1	50	MIC (uM)	Enterococcus faecalis	n.d	EF	Gram	GIT	Bacillus sbtilis	MD	N/A	None	None	0	t	0.424	0	0.073	0.075	EFD-0.1%-	0.00711082	0.0799971	-0.147	-0.15	0	0
856	CuOEFN/AAmpicillin	2.96364	72.7745	-1.47037	0.950904	1	0.186886	CHEMBL174	CuO	EF	N/A	Ampicillin	MIC ug.mL-1	-1	50	MIC (uM)	Enterococcus faecalis	n.d	EF	Gram	GIT	Bacillus sbtilis	MD	N/A	None	None	0	t	0.424	0	0.073	0.075	EFD-0.1%-	0.00711082	0.0799971	-0.147	-0.15	0	0
857	CuOEFN/AAmpicillin	1.43472	71.2456	-2.99928	0.807636	1	0.0474583	CHEMBL174	CuO	EF	N/A	Ampicillin	MIC nM	-1	2500	MIC (uM)	Enterococcus faecalis	n.d	EF	Gram	GIT	Bacillus sbtilis	MD	N/A	None	None	0	t	0.151	0	0.073	0.075	EFD-0.1%-	0.00711082	0.0799971	-0.147	-0.15	0	0
858	CuOEFN/AAmpicillin	1.65874	71.4696	-2.77527	0.840069	1	0.0586755	CHEMBL174	CuO	EF	N/A	Ampicillin	Activity %	1	70	MIC (uM)	Enterococcus faecalis	n.d	EF	Gram	GIT	Bacillus sbtilis	MD	N/A	None	None	0	v	0.191	0	0.073	0.075	EFD-0.1%-	0.00711082	0.0799971	-0.147	-0.15	0	0
859	CuIEFN/AAmpicillin	4.0037	73.8145	-0.43031	0.982079	1	0.394052	CHEMBL174	CuI	EF	N/A	Ampicillin	MIC90 ug.mL-1	-1	34.891	MIC (uM)	Enterococcus faecalis	n.d	EF	Gram	GIT	Bacillus subtilis	ATCC6633	N/A	None	None	0	t	0.452	0	0.073	0.075	EFD-0.1%-	0.00711082	0.0799971	-0.143	-0.15	-0.001	0
860	CuIEFN/AAmpicillin	4.20531	74.0162	-0.228695	0.985303	1	0.443074	CHEMBL174	CuI	EF	N/A	Ampicillin	MIC50 ug.mL-1	-1	21.529	MIC (uM)	Enterococcus faecalis	n.d	EF	Gram	GIT	Bacillus subtilis	ATCC6633	N/A	None	None	0	t	0.488	0	0.073	0.075	EFD-0.1%-	0.00711082	0.0799971	-0.143	-0.15	-0.001	0
861	CuIEFN/AAmpicillin	3.84688	73.6577	-0.587121	0.9791	1	0.357296	CHEMBL174	CuI	EF	N/A	Ampicillin	MIC ug.mL-1	-1	50	MIC (uM)	Enterococcus faecalis	n.d	EF	Gram	GIT	Bacillus subtilis	ATCC6633	N/A	None	None	0	v	0.424	0	0.073	0.075	EFD-0.1%-	0.00711082	0.0799971	-0.143	-0.15	-0.001	0
862	CuIEFN/AAmpicillin	3.84688	73.6577	-0.587121	0.9791	1	0.357296	CHEMBL174	CuI	EF	N/A	Ampicillin	MIC ug.mL-1	-1	50	MIC (uM)	Enterococcus faecalis	n.d	EF	Gram	GIT	Bacillus subtilis	ATCC6633	N/A	None	None	0	t	0.424	0	0.073	0.075	EFD-0.1%-	0.00711082	0.0799971	-0.143	-0.15	-0.001	0
863	CuIEFN/AAmpicillin	2.54199	72.3528	-1.89202	0.927033	1	0.131015	CHEMBL174	CuI	EF	N/A	Ampicillin	Activity %	1	70	MIC (uM)	Enterococcus faecalis	n.d	EF	Gram	GIT	Bacillus subtilis	ATCC6633	N/A	None	None	0	t	0.191	0	0.073	0.075	EFD-0.1%-	0.00711082	0.0799971	-0.143	-0.15	-0.001	0
864	CuOEFN/AAmpicillin	3.42847	73.2393	-1.00554	0.968583	1	0.267854	CHEMBL174	CuO	EF	N/A	Ampicillin	IZ mm	1	5	MIC (uM)	Enterococcus faecalis	ATCC29212	EF	Gram	GIT	Bacillus sbtilis	MD	N/A	None	None	0	t	0.507	0	0.073	0.075	EFD-0.1%-	0.00711082	0.0799971	-0.147	-0.15	0	0
865	CuOEFN/AAmpicillin	3.12045	72.9313	-1.31356	0.957728	1	0.211892	CHEMBL174	CuO	EF	N/A	Ampicillin	MIC90 ug.mL-1	-1	34.891	MIC (uM)	Enterococcus faecalis	n.d	EF	Gram	GIT	Bacillus sbtilis	MD	N/A	None	None	0	t	0.452	0	0.073	0.075	EFD-0.1%-	0.00711082	0.0799971	-0.147	-0.15	0	0
866	CuOEFN/AAmpicillin	2.96364	72.7745	-1.47037	0.950904	1	0.186886	CHEMBL174	CuO	EF	N/A	Ampicillin	MIC ug.mL-1	-1	50	MIC (uM)	Enterococcus faecalis	n.d	EF	Gram	GIT	Bacillus sbtilis	MD	N/A	None	None	0	t	0.424	0	0.073	0.075	EFD-0.1%-	0.00711082	0.0799971	-0.147	-0.15	0	0
867	CuOEFN/AAmpicillin	2.96364	72.7745	-1.47037	0.950904	1	0.186886	CHEMBL174	CuO	EF	N/A	Ampicillin	MIC ug.mL-1	-1	50	MIC (uM)	Enterococcus faecalis	n.d	EF	Gram	GIT	Bacillus sbtilis	MD	N/A	None	None	0	v	0.424	0	0.073	0.075	EFD-0.1%-	0.00711082	0.0799971	-0.147	-0.15	0	0
868	CuOEFN/AAmpicillin	1.65874	71.4696	-2.77527	0.840069	1	0.0586755	CHEMBL174	CuO	EF	N/A	Ampicillin	Activity %	1	70	MIC (uM)	Enterococcus faecalis	n.d	EF	Gram	GIT	Bacillus sbtilis	MD	N/A	None	None	0	t	0.191	0	0.073	0.075	EFD-0.1%-	0.00711082	0.0799971	-0.147	-0.15	0	0
869	CuOEFN/AAmpicillin	2.22998	72.0408	-2.20402	0.90291	1	0.0993898	CHEMBL174	CuO	EF	N/A	Ampicillin	MBC mM	-1	1.674	MIC (uM)	Enterococcus faecalis	ATCC29212	EF	Gram	GIT	Bacillus sbtilis	MD	N/A	None	None	0	t	0.293	0	0.073	0.075	EFD-0.1%-	0.00711082	0.0799971	-0.147	-0.15	0	0
870	CuOEFN/AAmpicillin	3.12045	72.9313	-1.31356	0.957728	1	0.211892	CHEMBL174	CuO	EF	N/A	Ampicillin	MIC90 ug.mL-1	-1	34.891	MIC (uM)	Enterococcus faecalis	n.d	EF	Gram	GIT	Bacillus sbtilis	MD	N/A	None	None	0	t	0.452	0	0.073	0.075	EFD-0.1%-	0.00711082	0.0799971	-0.147	-0.15	0	0
871	CuOEFN/AAmpicillin	2.96364	72.7745	-1.47037	0.950904	1	0.186886	CHEMBL174	CuO	EF	N/A	Ampicillin	MIC ug.mL-1	-1	50	MIC (uM)	Enterococcus faecalis	n.d	EF	Gram	GIT	Bacillus sbtilis	MD	N/A	None	None	0	t	0.424	0	0.073	0.075	EFD-0.1%-	0.00711082	0.0799971	-0.147	-0.15	0	0
872	CuOEFN/AAmpicillin	2.96364	72.7745	-1.47037	0.950904	1	0.186886	CHEMBL174	CuO	EF	N/A	Ampicillin	MIC ug.mL-1	-1	50	MIC (uM)	Enterococcus faecalis	n.d	EF	Gram	GIT	Bacillus sbtilis	MD	N/A	None	None	0	v	0.424	0	0.073	0.075	EFD-0.1%-	0.00711082	0.0799971	-0.147	-0.15	0	0
873	CuOEFN/AAmpicillin	1.65874	71.4696	-2.77527	0.840069	1	0.0586755	CHEMBL174	CuO	EF	N/A	Ampicillin	Activity %	1	70	MIC (uM)	Enterococcus faecalis	n.d	EF	Gram	GIT	Bacillus sbtilis	MD	N/A	None	None	0	t	0.191	0	0.073	0.075	EFD-0.1%-	0.00711082	0.0799971	-0.147	-0.15	0	0
874	CuOEFN/AAmpicillin	2.37762	72.1885	-2.05638	0.915105	1	0.113409	CHEMBL174	CuO	EF	N/A	Ampicillin	MIC ug.mL-1	-1	50	MBC (uM)	Enterococcus faecalis ATCC 29212	n.d	EF	Gram	GIT	Bacillus sbtilis	MD	N/A	None	None	0	t	0.324	0	0.073	0.075	EFD-0.1%-	0.00711082	0.0799971	-0.147	-0.15	0	-0.001
875	CuOEFN/AAmpicillin	2.93766	72.7485	-1.49634	0.949677	1	0.182972	CHEMBL174	CuO	EF	N/A	Ampicillin	MIC ug.mL-1	-1	50	MIC (uM)	Enterococcus faecalis ATCC 29212	n.d	EF	Gram	GIT	Bacillus sbtilis	MD	N/A	None	None	0	t	0.424	0	0.073	0.075	EFD-0.1%-	0.00711082	0.0799971	-0.147	-0.15	0	-0.001
876	ZnOHIN/AAmpicillin	1.0558	43.3862	1.05674	0.741888	1	0.742068	CHEMBL174	ZnO	HI	N/A	Ampicillin	MIC90 ug.mL-1	-1	34.891	MBC (uM)	Haemophilus influenzae	n.d	HI	Gram-	Systemic	Bacillus sbtilis	MD	N/A	None	None	0	t	0.345	0	0.046	0.047	HID-0.1%-	0.00843435	0.0544116	-0.147	-0.15	0	0.001
877	ZnOHIN/AAmpicillin	1.0558	43.3862	1.05674	0.741888	1	0.742068	CHEMBL174	ZnO	HI	N/A	Ampicillin	MIC90 ug.mL-1	-1	34.891	MBC (uM)	Haemophilus influenzae	n.d	HI	Gram-	Systemic	Bacillus sbtilis	MD	N/A	None	None	0	t	0.345	0	0.046	0.047	HID-0.1%-	0.00843435	0.0544116	-0.147	-0.15	0	0.001
878	ZnOHIN/AAmpicillin	1.0558	43.3862	1.05674	0.741888	1	0.742068	CHEMBL174	ZnO	HI	N/A	Ampicillin	MIC90 ug.mL-1	-1	34.891	MBC (uM)	Haemophilus influenzae	n.d	HI	Gram-	Systemic	Bacillus sbtilis	MD	N/A	None	None	0	v	0.345	0	0.046	0.047	HID-0.1%-	0.00843435	0.0544116	-0.147	-0.15	0	0.001
879	ZnOHIN/AAmpicillin	1.21261	43.5431	1.21356	0.770761	1	0.770927	CHEMBL174	ZnO	HI	N/A	Ampicillin	MIC50 ug.mL-1	-1	21.529	MBC (uM)	Haemophilus influenzae	n.d	HI	Gram-	Systemic	Bacillus sbtilis	MD	N/A	None	None	0	t	0.373	0	0.046	0.047	HID-0.1%-	0.00843435	0.0544116	-0.147	-0.15	0	0.001
880	ZnOHIN/AAmpicillin	1.21261	43.5431	1.21356	0.770761	1	0.770927	CHEMBL174	ZnO	HI	N/A	Ampicillin	MIC50 ug.mL-1	-1	21.529	MBC (uM)	Haemophilus influenzae	n.d	HI	Gram-	Systemic	Bacillus sbtilis	MD	N/A	None	None	0	t	0.373	0	0.046	0.047	HID-0.1%-	0.00843435	0.0544116	-0.147	-0.15	0	0.001
881	ZnOHIN/AAmpicillin	1.21261	43.5431	1.21356	0.770761	1	0.770927	CHEMBL174	ZnO	HI	N/A	Ampicillin	MIC50 ug.mL-1	-1	21.529	MBC (uM)	Haemophilus influenzae	n.d	HI	Gram-	Systemic	Bacillus sbtilis	MD	N/A	None	None	0	t	0.373	0	0.046	0.047	HID-0.1%-	0.00843435	0.0544116	-0.147	-0.15	0	0.001
882	ZnOHIN/AAmpicillin	0.938194	43.2686	0.939135	0.718735	1	0.718925	CHEMBL174	ZnO	HI	N/A	Ampicillin	MIC ug.mL-1	-1	50	MBC (uM)	Haemophilus influenzae	n.d	HI	Gram-	Systemic	Bacillus sbtilis	MD	N/A	None	None	0	t	0.324	0	0.046	0.047	HID-0.1%-	0.00843435	0.0544116	-0.147	-0.15	0	0.001
883	ZnOHIN/AAmpicillin	0.938194	43.2686	0.939135	0.718735	1	0.718925	CHEMBL174	ZnO	HI	N/A	Ampicillin	MIC ug.mL-1	-1	50	MBC (uM)	Haemophilus influenzae	n.d	HI	Gram-	Systemic	Bacillus sbtilis	MD	N/A	None	None	0	t	0.324	0	0.046	0.047	HID-0.1%-	0.00843435	0.0544116	-0.147	-0.15	0	0.001
884	ZnOHIN/AAmpicillin	0.938194	43.2686	0.939135	0.718735	1	0.718925	CHEMBL174	ZnO	HI	N/A	Ampicillin	MIC ug.mL-1	-1	50	MBC (uM)	Haemophilus influenzae	n.d	HI	Gram-	Systemic	Bacillus sbtilis	MD	N/A	None	None	0	t	0.324	0	0.046	0.047	HID-0.1%-	0.00843435	0.0544116	-0.147	-0.15	0	0.001
885	ZnOHIN/AAmpicillin	0.938194	43.2686	0.939135	0.718735	1	0.718925	CHEMBL174	ZnO	HI	N/A	Ampicillin	MIC ug.mL-1	-1	50	MBC (uM)	Haemophilus influenzae	n.d	HI	Gram-	Systemic	Bacillus sbtilis	MD	N/A	None	None	0	v	0.324	0	0.046	0.047	HID-0.1%-	0.00843435	0.0544116	-0.147	-0.15	0	0.001
886	ZnOHIN/AAmpicillin	0.938194	43.2686	0.939135	0.718735	1	0.718925	CHEMBL174	ZnO	HI	N/A	Ampicillin	MIC ug.mL-1	-1	50	MBC (uM)	Haemophilus influenzae	n.d	HI	Gram-	Systemic	Bacillus sbtilis	MD	N/A	None	None	0	t	0.324	0	0.046	0.047	HID-0.1%-	0.00843435	0.0544116	-0.147	-0.15	0	0.001
887	ZnOHIN/AAmpicillin	-0.0586789	42.2718	-0.0577374	0.485334	1	0.48557	CHEMBL174	ZnO	HI	N/A	Ampicillin	Activity %	1	70	MBC (uM)	Haemophilus influenzae	n.d	HI	Gram-	Systemic	Bacillus sbtilis	MD	N/A	None	None	0	t	0.146	0	0.046	0.047	HID-0.1%-	0.00843435	0.0544116	-0.147	-0.15	0	0.001
888	ZnOHIN/AAmpicillin	-0.0586789	42.2718	-0.0577374	0.485334	1	0.48557	CHEMBL174	ZnO	HI	N/A	Ampicillin	Activity %	1	70	MBC (uM)	Haemophilus influenzae	n.d	HI	Gram-	Systemic	Bacillus sbtilis	MD	N/A	None	None	0	t	0.146	0	0.046	0.047	HID-0.1%-	0.00843435	0.0544116	-0.147	-0.15	0	0.001
889	ZnOHIN/AAmpicillin	-0.0586789	42.2718	-0.0577374	0.485334	1	0.48557	CHEMBL174	ZnO	HI	N/A	Ampicillin	Activity %	1	70	MBC (uM)	Haemophilus influenzae	n.d	HI	Gram-	Systemic	Bacillus sbtilis	MD	N/A	None	None	0	v	0.146	0	0.046	0.047	HID-0.1%-	0.00843435	0.0544116	-0.147	-0.15	0	0.001
890	CuOHIN/AAmpicillin	0.938194	43.2686	0.939135	0.718735	1	0.718925	CHEMBL174	CuO	HI	N/A	Ampicillin	MIC ug.mL-1	-1	50	MBC (uM)	Haemophilus influenzae	MSC02070	HI	Gram-	Systemic	Bacillus sbtilis	MD	N/A	None	None	0	v	0.324	0	0.046	0.047	HID-0.1%-	0.00843435	0.0544116	-0.147	-0.15	0	0.001
891	CuOHIN/AAmpicillin	1.0558	43.3862	1.05674	0.741888	1	0.742068	CHEMBL174	CuO	HI	N/A	Ampicillin	MIC90 ug.mL-1	-1	34.891	MBC (uM)	Haemophilus influenzae	n.d	HI	Gram-	Systemic	Bacillus sbtilis	MD	N/A	None	None	0	t	0.345	0	0.046	0.047	HID-0.1%-	0.00843435	0.0544116	-0.147	-0.15	0	0.001
892	CuOHIN/AAmpicillin	1.0558	43.3862	1.05674	0.741888	1	0.742068	CHEMBL174	CuO	HI	N/A	Ampicillin	MIC90 ug.mL-1	-1	34.891	MBC (uM)	Haemophilus influenzae	n.d	HI	Gram-	Systemic	Bacillus sbtilis	MD	N/A	None	None	0	t	0.345	0	0.046	0.047	HID-0.1%-	0.00843435	0.0544116	-0.147	-0.15	0	0.001
893	CuOHIN/AAmpicillin	1.0558	43.3862	1.05674	0.741888	1	0.742068	CHEMBL174	CuO	HI	N/A	Ampicillin	MIC90 ug.mL-1	-1	34.891	MBC (uM)	Haemophilus influenzae	n.d	HI	Gram-	Systemic	Bacillus sbtilis	MD	N/A	None	None	0	t	0.345	0	0.046	0.047	HID-0.1%-	0.00843435	0.0544116	-0.147	-0.15	0	0.001
894	CuOHIN/AAmpicillin	1.21261	43.5431	1.21356	0.770761	1	0.770927	CHEMBL174	CuO	HI	N/A	Ampicillin	MIC50 ug.mL-1	-1	21.529	MBC (uM)	Haemophilus influenzae	n.d	HI	Gram-	Systemic	Bacillus sbtilis	MD	N/A	None	None	0	v	0.373	0	0.046	0.047	HID-0.1%-	0.00843435	0.0544116	-0.147	-0.15	0	0.001
895	CuOHIN/AAmpicillin	1.21261	43.5431	1.21356	0.770761	1	0.770927	CHEMBL174	CuO	HI	N/A	Ampicillin	MIC50 ug.mL-1	-1	21.529	MBC (uM)	Haemophilus influenzae	n.d	HI	Gram-	Systemic	Bacillus sbtilis	MD	N/A	None	None	0	t	0.373	0	0.046	0.047	HID-0.1%-	0.00843435	0.0544116	-0.147	-0.15	0	0.001
896	CuOHIN/AAmpicillin	1.21261	43.5431	1.21356	0.770761	1	0.770927	CHEMBL174	CuO	HI	N/A	Ampicillin	MIC50 ug.mL-1	-1	21.529	MBC (uM)	Haemophilus influenzae	n.d	HI	Gram-	Systemic	Bacillus sbtilis	MD	N/A	None	None	0	t	0.373	0	0.046	0.047	HID-0.1%-	0.00843435	0.0544116	-0.147	-0.15	0	0.001
897	CuOHIN/AAmpicillin	0.938194	43.2686	0.939135	0.718735	1	0.718925	CHEMBL174	CuO	HI	N/A	Ampicillin	MIC ug.mL-1	-1	50	MBC (uM)	Haemophilus influenzae	n.d	HI	Gram-	Systemic	Bacillus sbtilis	MD	N/A	None	None	0	t	0.324	0	0.046	0.047	HID-0.1%-	0.00843435	0.0544116	-0.147	-0.15	0	0.001
898	CuOHIN/AAmpicillin	0.938194	43.2686	0.939135	0.718735	1	0.718925	CHEMBL174	CuO	HI	N/A	Ampicillin	MIC ug.mL-1	-1	50	MBC (uM)	Haemophilus influenzae	n.d	HI	Gram-	Systemic	Bacillus sbtilis	MD	N/A	None	None	0	v	0.324	0	0.046	0.047	HID-0.1%-	0.00843435	0.0544116	-0.147	-0.15	0	0.001
899	CuOHIN/AAmpicillin	0.938194	43.2686	0.939135	0.718735	1	0.718925	CHEMBL174	CuO	HI	N/A	Ampicillin	MIC ug.mL-1	-1	50	MBC (uM)	Haemophilus influenzae	n.d	HI	Gram-	Systemic	Bacillus sbtilis	MD	N/A	None	None	0	t	0.324	0	0.046	0.047	HID-0.1%-	0.00843435	0.0544116	-0.147	-0.15	0	0.001
900	CuOHIN/AAmpicillin	0.938194	43.2686	0.939135	0.718735	1	0.718925	CHEMBL174	CuO	HI	N/A	Ampicillin	MIC ug.mL-1	-1	50	MBC (uM)	Haemophilus influenzae	n.d	HI	Gram-	Systemic	Bacillus sbtilis	MD	N/A	None	None	0	t	0.324	0	0.046	0.047	HID-0.1%-	0.00843435	0.0544116	-0.147	-0.15	0	0.001
901	CuOHIN/AAmpicillin	0.938194	43.2686	0.939135	0.718735	1	0.718925	CHEMBL174	CuO	HI	N/A	Ampicillin	MIC ug.mL-1	-1	50	MBC (uM)	Haemophilus influenzae	n.d	HI	Gram-	Systemic	Bacillus sbtilis	MD	N/A	None	None	0	t	0.324	0	0.046	0.047	HID-0.1%-	0.00843435	0.0544116	-0.147	-0.15	0	0.001
902	CuOHIN/AAmpicillin	0.938194	43.2686	0.939135	0.718735	1	0.718925	CHEMBL174	CuO	HI	N/A	Ampicillin	MIC ug.mL-1	-1	50	MBC (uM)	Haemophilus influenzae	n.d	HI	Gram-	Systemic	Bacillus sbtilis	MD	N/A	None	None	0	v	0.324	0	0.046	0.047	HID-0.1%-	0.00843435	0.0544116	-0.147	-0.15	0	0.001
903	CuOHIN/AAmpicillin	0.792583	43.123	0.793525	0.688386	1	0.688588	CHEMBL174	CuO	HI	N/A	Ampicillin	MIC ug	-1	30.003	MBC (uM)	Haemophilus influenzae	n.d	HI	Gram-	Systemic	Bacillus sbtilis	MD	N/A	None	None	0	t	0.298	0	0.046	0.047	HID-0.1%-	0.00843435	0.0544116	-0.147	-0.15	0	0.001
904	CuOHIN/AAmpicillin	1.54864	43.8791	1.54958	0.824717	1	0.824853	CHEMBL174	CuO	HI	N/A	Ampicillin	ED50 mg.kg-1	-1	130.34	MBC (uM)	Haemophilus influenzae	n.d	HI	Gram-	Systemic	Bacillus sbtilis	MD	N/A	None	None	0	t	0.433	0	0.046	0.047	HID-0.1%-	0.00843435	0.0544116	-0.147	-0.15	0	0.001
905	CuOHIN/AAmpicillin	-0.0586789	42.2718	-0.0577374	0.485334	1	0.48557	CHEMBL174	CuO	HI	N/A	Ampicillin	Activity %	1	70	MBC (uM)	Haemophilus influenzae	n.d	HI	Gram-	Systemic	Bacillus sbtilis	MD	N/A	None	None	0	t	0.146	0	0.046	0.047	HID-0.1%-	0.00843435	0.0544116	-0.147	-0.15	0	0.001
906	CuOHIN/AAmpicillin	-0.0586789	42.2718	-0.0577374	0.485334	1	0.48557	CHEMBL174	CuO	HI	N/A	Ampicillin	Activity %	1	70	MBC (uM)	Haemophilus influenzae	n.d	HI	Gram-	Systemic	Bacillus sbtilis	MD	N/A	None	None	0	v	0.146	0	0.046	0.047	HID-0.1%-	0.00843435	0.0544116	-0.147	-0.15	0	0.001
907	CuOHIN/AAmpicillin	-0.0586789	42.2718	-0.0577374	0.485334	1	0.48557	CHEMBL174	CuO	HI	N/A	Ampicillin	Activity %	1	70	MBC (uM)	Haemophilus influenzae	n.d	HI	Gram-	Systemic	Bacillus sbtilis	MD	N/A	None	None	0	t	0.146	0	0.046	0.047	HID-0.1%-	0.00843435	0.0544116	-0.147	-0.15	0	0.001
908	Fe2O3HIN/AAmpicillin	1.0558	43.3862	1.05674	0.741888	1	0.742068	CHEMBL174	Fe2O3	HI	N/A	Ampicillin	MIC90 ug.mL-1	-1	34.891	MBC (uM)	Haemophilus influenzae	n.d	HI	Gram-	Systemic	Bacillus sbtilis	MD	N/A	None	None	0	t	0.345	0	0.046	0.047	HID-0.1%-	0.00843435	0.0544116	-0.147	-0.15	0	0.001
909	Fe2O3HIN/AAmpicillin	1.0558	43.3862	1.05674	0.741888	1	0.742068	CHEMBL174	Fe2O3	HI	N/A	Ampicillin	MIC90 ug.mL-1	-1	34.891	MBC (uM)	Haemophilus influenzae	n.d	HI	Gram-	Systemic	Bacillus sbtilis	MD	N/A	None	None	0	t	0.345	0	0.046	0.047	HID-0.1%-	0.00843435	0.0544116	-0.147	-0.15	0	0.001
910	Fe2O3HIN/AAmpicillin	1.0558	43.3862	1.05674	0.741888	1	0.742068	CHEMBL174	Fe2O3	HI	N/A	Ampicillin	MIC90 ug.mL-1	-1	34.891	MBC (uM)	Haemophilus influenzae	n.d	HI	Gram-	Systemic	Bacillus sbtilis	MD	N/A	None	None	0	v	0.345	0	0.046	0.047	HID-0.1%-	0.00843435	0.0544116	-0.147	-0.15	0	0.001
911	Fe2O3HIN/AAmpicillin	1.21261	43.5431	1.21356	0.770761	1	0.770927	CHEMBL174	Fe2O3	HI	N/A	Ampicillin	MIC50 ug.mL-1	-1	21.529	MBC (uM)	Haemophilus influenzae	n.d	HI	Gram-	Systemic	Bacillus sbtilis	MD	N/A	None	None	0	t	0.373	0	0.046	0.047	HID-0.1%-	0.00843435	0.0544116	-0.147	-0.15	0	0.001
912	Fe2O3HIN/AAmpicillin	1.21261	43.5431	1.21356	0.770761	1	0.770927	CHEMBL174	Fe2O3	HI	N/A	Ampicillin	MIC50 ug.mL-1	-1	21.529	MBC (uM)	Haemophilus influenzae	n.d	HI	Gram-	Systemic	Bacillus sbtilis	MD	N/A	None	None	0	t	0.373	0	0.046	0.047	HID-0.1%-	0.00843435	0.0544116	-0.147	-0.15	0	0.001
913	Fe2O3HIN/AAmpicillin	0.938194	43.2686	0.939135	0.718735	1	0.718925	CHEMBL174	Fe2O3	HI	N/A	Ampicillin	MIC ug.mL-1	-1	50	MBC (uM)	Haemophilus influenzae	n.d	HI	Gram-	Systemic	Bacillus sbtilis	MD	N/A	None	None	0	t	0.324	0	0.046	0.047	HID-0.1%-	0.00843435	0.0544116	-0.147	-0.15	0	0.001
914	Fe2O3HIN/AAmpicillin	0.938194	43.2686	0.939135	0.718735	1	0.718925	CHEMBL174	Fe2O3	HI	N/A	Ampicillin	MIC ug.mL-1	-1	50	MBC (uM)	Haemophilus influenzae	n.d	HI	Gram-	Systemic	Bacillus sbtilis	MD	N/A	None	None	0	v	0.324	0	0.046	0.047	HID-0.1%-	0.00843435	0.0544116	-0.147	-0.15	0	0.001
915	Fe2O3HIN/AAmpicillin	0.938194	43.2686	0.939135	0.718735	1	0.718925	CHEMBL174	Fe2O3	HI	N/A	Ampicillin	MIC ug.mL-1	-1	50	MBC (uM)	Haemophilus influenzae	n.d	HI	Gram-	Systemic	Bacillus sbtilis	MD	N/A	None	None	0	t	0.324	0	0.046	0.047	HID-0.1%-	0.00843435	0.0544116	-0.147	-0.15	0	0.001
916	Fe2O3HIN/AAmpicillin	0.938194	43.2686	0.939135	0.718735	1	0.718925	CHEMBL174	Fe2O3	HI	N/A	Ampicillin	MIC ug.mL-1	-1	50	MBC (uM)	Haemophilus influenzae	n.d	HI	Gram-	Systemic	Bacillus sbtilis	MD	N/A	None	None	0	t	0.324	0	0.046	0.047	HID-0.1%-	0.00843435	0.0544116	-0.147	-0.15	0	0.001
917	Fe2O3HIN/AAmpicillin	0.938194	43.2686	0.939135	0.718735	1	0.718925	CHEMBL174	Fe2O3	HI	N/A	Ampicillin	MIC ug.mL-1	-1	50	MBC (uM)	Haemophilus influenzae	n.d	HI	Gram-	Systemic	Bacillus sbtilis	MD	N/A	None	None	0	t	0.324	0	0.046	0.047	HID-0.1%-	0.00843435	0.0544116	-0.147	-0.15	0	0.001
918	Fe2O3HIN/AAmpicillin	0.938194	43.2686	0.939135	0.718735	1	0.718925	CHEMBL174	Fe2O3	HI	N/A	Ampicillin	MIC ug.mL-1	-1	50	MBC (uM)	Haemophilus influenzae	n.d	HI	Gram-	Systemic	Bacillus sbtilis	MD	N/A	None	None	0	v	0.324	0	0.046	0.047	HID-0.1%-	0.00843435	0.0544116	-0.147	-0.15	0	0.001
919	Fe2O3HIN/AAmpicillin	1.54864	43.8791	1.54958	0.824717	1	0.824853	CHEMBL174	Fe2O3	HI	N/A	Ampicillin	ED50 mg.kg-1	-1	130.34	MBC (uM)	Haemophilus influenzae	n.d	HI	Gram-	Systemic	Bacillus sbtilis	MD	N/A	None	None	0	t	0.433	0	0.046	0.047	HID-0.1%-	0.00843435	0.0544116	-0.147	-0.15	0	0.001
920	Fe2O3HIN/AAmpicillin	-0.0586789	42.2718	-0.0577374	0.485334	1	0.48557	CHEMBL174	Fe2O3	HI	N/A	Ampicillin	Activity %	1	70	MBC (uM)	Haemophilus influenzae	n.d	HI	Gram-	Systemic	Bacillus sbtilis	MD	N/A	None	None	0	t	0.146	0	0.046	0.047	HID-0.1%-	0.00843435	0.0544116	-0.147	-0.15	0	0.001
921	Fe2O3HIN/AAmpicillin	-0.0586789	42.2718	-0.0577374	0.485334	1	0.48557	CHEMBL174	Fe2O3	HI	N/A	Ampicillin	Activity %	1	70	MBC (uM)	Haemophilus influenzae	n.d	HI	Gram-	Systemic	Bacillus sbtilis	MD	N/A	None	None	0	t	0.146	0	0.046	0.047	HID-0.1%-	0.00843435	0.0544116	-0.147	-0.15	0	0.001
922	Fe2O3HIN/AAmpicillin	-0.0586789	42.2718	-0.0577374	0.485334	1	0.48557	CHEMBL174	Fe2O3	HI	N/A	Ampicillin	Activity %	1	70	MBC (uM)	Haemophilus influenzae	n.d	HI	Gram-	Systemic	Bacillus sbtilis	MD	N/A	None	None	0	v	0.146	0	0.046	0.047	HID-0.1%-	0.00843435	0.0544116	-0.147	-0.15	0	0.001
923	AgHIN/AAmpicillin	1.68974	44.0202	1.69068	0.84419	1	0.844314	CHEMBL174	Ag	HI	N/A	Ampicillin	MIC ug.mL-1	-1	50	MBC (uM)	Haemophilus influenzae	MSC06647	HI	Gram-	Systemic	Bacillus subtilis	ATCC6633	Spherical	None	None	0	t	0.324	0	0.046	0.047	HID-0.1%-	0.00843435	0.0544116	-0.147	-0.135	-0.001	0.001
924	AgHIN/AAmpicillin	1.68974	44.0202	1.69068	0.84419	1	0.844314	CHEMBL174	Ag	HI	N/A	Ampicillin	MIC ug.mL-1	-1	50	MBC (uM)	Haemophilus influenzae	MSC06663	HI	Gram-	Systemic	Bacillus subtilis	ATCC6633	Spherical	None	None	0	v	0.324	0	0.046	0.047	HID-0.1%-	0.00843435	0.0544116	-0.147	-0.135	-0.001	0.001
925	AgHIN/AAmpicillin	1.80735	44.1378	1.80829	0.859041	1	0.859155	CHEMBL174	Ag	HI	N/A	Ampicillin	MIC90 ug.mL-1	-1	34.891	MBC (uM)	Haemophilus influenzae	n.d	HI	Gram-	Systemic	Bacillus subtilis	ATCC6633	Spherical	None	None	0	t	0.345	0	0.046	0.047	HID-0.1%-	0.00843435	0.0544116	-0.147	-0.135	-0.001	0.001
926	AgHIN/AAmpicillin	1.80735	44.1378	1.80829	0.859041	1	0.859155	CHEMBL174	Ag	HI	N/A	Ampicillin	MIC90 ug.mL-1	-1	34.891	MBC (uM)	Haemophilus influenzae	n.d	HI	Gram-	Systemic	Bacillus subtilis	ATCC6633	Spherical	None	None	0	t	0.345	0	0.046	0.047	HID-0.1%-	0.00843435	0.0544116	-0.147	-0.135	-0.001	0.001
927	AgHIN/AAmpicillin	1.80735	44.1378	1.80829	0.859041	1	0.859155	CHEMBL174	Ag	HI	N/A	Ampicillin	MIC90 ug.mL-1	-1	34.891	MBC (uM)	Haemophilus influenzae	n.d	HI	Gram-	Systemic	Bacillus subtilis	ATCC6633	Spherical	None	None	0	t	0.345	0	0.046	0.047	HID-0.1%-	0.00843435	0.0544116	-0.147	-0.135	-0.001	0.001
928	AgHIN/AAmpicillin	1.96416	44.2946	1.9651	0.876983	1	0.877084	CHEMBL174	Ag	HI	N/A	Ampicillin	MIC50 ug.mL-1	-1	21.529	MBC (uM)	Haemophilus influenzae	n.d	HI	Gram-	Systemic	Bacillus subtilis	ATCC6633	Spherical	None	None	0	v	0.373	0	0.046	0.047	HID-0.1%-	0.00843435	0.0544116	-0.147	-0.135	-0.001	0.001
929	AgHIN/AAmpicillin	1.96416	44.2946	1.9651	0.876983	1	0.877084	CHEMBL174	Ag	HI	N/A	Ampicillin	MIC50 ug.mL-1	-1	21.529	MBC (uM)	Haemophilus influenzae	n.d	HI	Gram-	Systemic	Bacillus subtilis	ATCC6633	Spherical	None	None	0	t	0.373	0	0.046	0.047	HID-0.1%-	0.00843435	0.0544116	-0.147	-0.135	-0.001	0.001
930	AgHIN/AAmpicillin	1.68974	44.0202	1.69068	0.84419	1	0.844314	CHEMBL174	Ag	HI	N/A	Ampicillin	MIC ug.mL-1	-1	50	MBC (uM)	Haemophilus influenzae	n.d	HI	Gram-	Systemic	Bacillus subtilis	ATCC6633	Spherical	None	None	0	t	0.324	0	0.046	0.047	HID-0.1%-	0.00843435	0.0544116	-0.147	-0.135	-0.001	0.001
931	AgHIN/AAmpicillin	1.68974	44.0202	1.69068	0.84419	1	0.844314	CHEMBL174	Ag	HI	N/A	Ampicillin	MIC ug.mL-1	-1	50	MBC (uM)	Haemophilus influenzae	n.d	HI	Gram-	Systemic	Bacillus subtilis	ATCC6633	Spherical	None	None	0	v	0.324	0	0.046	0.047	HID-0.1%-	0.00843435	0.0544116	-0.147	-0.135	-0.001	0.001
932	AgHIN/AAmpicillin	1.68974	44.0202	1.69068	0.84419	1	0.844314	CHEMBL174	Ag	HI	N/A	Ampicillin	MIC ug.mL-1	-1	50	MBC (uM)	Haemophilus influenzae	n.d	HI	Gram-	Systemic	Bacillus subtilis	ATCC6633	Spherical	None	None	0	t	0.324	0	0.046	0.047	HID-0.1%-	0.00843435	0.0544116	-0.147	-0.135	-0.001	0.001
933	AgHIN/AAmpicillin	1.68974	44.0202	1.69068	0.84419	1	0.844314	CHEMBL174	Ag	HI	N/A	Ampicillin	MIC ug.mL-1	-1	50	MBC (uM)	Haemophilus influenzae	n.d	HI	Gram-	Systemic	Bacillus subtilis	ATCC6633	Spherical	None	None	0	t	0.324	0	0.046	0.047	HID-0.1%-	0.00843435	0.0544116	-0.147	-0.135	-0.001	0.001
934	AgHIN/AAmpicillin	1.68974	44.0202	1.69068	0.84419	1	0.844314	CHEMBL174	Ag	HI	N/A	Ampicillin	MIC ug.mL-1	-1	50	MBC (uM)	Haemophilus influenzae	n.d	HI	Gram-	Systemic	Bacillus subtilis	ATCC6633	Spherical	None	None	0	t	0.324	0	0.046	0.047	HID-0.1%-	0.00843435	0.0544116	-0.147	-0.135	-0.001	0.001
935	AgHIN/AAmpicillin	0.692869	43.0233	0.693811	0.666605	1	0.666814	CHEMBL174	Ag	HI	N/A	Ampicillin	Activity %	1	70	MBC (uM)	Haemophilus influenzae	n.d	HI	Gram-	Systemic	Bacillus subtilis	ATCC6633	Spherical	None	None	0	v	0.146	0	0.046	0.047	HID-0.1%-	0.00843435	0.0544116	-0.147	-0.135	-0.001	0.001
936	AgHIN/AAmpicillin	0.692869	43.0233	0.693811	0.666605	1	0.666814	CHEMBL174	Ag	HI	N/A	Ampicillin	Activity %	1	70	MBC (uM)	Haemophilus influenzae	n.d	HI	Gram-	Systemic	Bacillus subtilis	ATCC6633	Spherical	None	None	0	t	0.146	0	0.046	0.047	HID-0.1%-	0.00843435	0.0544116	-0.147	-0.135	-0.001	0.001
937	CuOHIN/AAmpicillin	0.938194	43.2686	0.939135	0.718735	1	0.718925	CHEMBL174	CuO	HI	N/A	Ampicillin	MIC ug.mL-1	-1	50	MBC (uM)	Haemophilus influenzae	MSC02104	HI	Gram-	Systemic	Bacillus sbtilis	MD	N/A	None	None	0	v	0.324	0	0.046	0.047	HID-0.1%-	0.00843435	0.0544116	-0.147	-0.15	0	0.001
938	CuOHIN/AAmpicillin	0.938194	43.2686	0.939135	0.718735	1	0.718925	CHEMBL174	CuO	HI	N/A	Ampicillin	MIC ug.mL-1	-1	50	MBC (uM)	Haemophilus influenzae	MSC06651	HI	Gram-	Systemic	Bacillus sbtilis	MD	N/A	None	None	0	t	0.324	0	0.046	0.047	HID-0.1%-	0.00843435	0.0544116	-0.147	-0.15	0	0.001
939	CuOHIN/AAmpicillin	0.938194	43.2686	0.939135	0.718735	1	0.718925	CHEMBL174	CuO	HI	N/A	Ampicillin	MIC ug.mL-1	-1	50	MBC (uM)	Haemophilus influenzae	MSC07169	HI	Gram-	Systemic	Bacillus sbtilis	MD	N/A	None	None	0	t	0.324	0	0.046	0.047	HID-0.1%-	0.00843435	0.0544116	-0.147	-0.15	0	0.001
940	CuOHIN/AAmpicillin	1.0558	43.3862	1.05674	0.741888	1	0.742068	CHEMBL174	CuO	HI	N/A	Ampicillin	MIC90 ug.mL-1	-1	34.891	MBC (uM)	Haemophilus influenzae	n.d	HI	Gram-	Systemic	Bacillus sbtilis	MD	N/A	None	None	0	t	0.345	0	0.046	0.047	HID-0.1%-	0.00843435	0.0544116	-0.147	-0.15	0	0.001
941	CuOHIN/AAmpicillin	1.0558	43.3862	1.05674	0.741888	1	0.742068	CHEMBL174	CuO	HI	N/A	Ampicillin	MIC90 ug.mL-1	-1	34.891	MBC (uM)	Haemophilus influenzae	n.d	HI	Gram-	Systemic	Bacillus sbtilis	MD	N/A	None	None	0	v	0.345	0	0.046	0.047	HID-0.1%-	0.00843435	0.0544116	-0.147	-0.15	0	0.001
942	CuOHIN/AAmpicillin	1.0558	43.3862	1.05674	0.741888	1	0.742068	CHEMBL174	CuO	HI	N/A	Ampicillin	MIC90 ug.mL-1	-1	34.891	MBC (uM)	Haemophilus influenzae	n.d	HI	Gram-	Systemic	Bacillus sbtilis	MD	N/A	None	None	0	t	0.345	0	0.046	0.047	HID-0.1%-	0.00843435	0.0544116	-0.147	-0.15	0	0.001
943	CuOHIN/AAmpicillin	1.21261	43.5431	1.21356	0.770761	1	0.770927	CHEMBL174	CuO	HI	N/A	Ampicillin	MIC50 ug.mL-1	-1	21.529	MBC (uM)	Haemophilus influenzae	n.d	HI	Gram-	Systemic	Bacillus sbtilis	MD	N/A	None	None	0	t	0.373	0	0.046	0.047	HID-0.1%-	0.00843435	0.0544116	-0.147	-0.15	0	0.001
944	CuOHIN/AAmpicillin	1.21261	43.5431	1.21356	0.770761	1	0.770927	CHEMBL174	CuO	HI	N/A	Ampicillin	MIC50 ug.mL-1	-1	21.529	MBC (uM)	Haemophilus influenzae	n.d	HI	Gram-	Systemic	Bacillus sbtilis	MD	N/A	None	None	0	t	0.373	0	0.046	0.047	HID-0.1%-	0.00843435	0.0544116	-0.147	-0.15	0	0.001
945	CuOHIN/AAmpicillin	0.938194	43.2686	0.939135	0.718735	1	0.718925	CHEMBL174	CuO	HI	N/A	Ampicillin	MIC ug.mL-1	-1	50	MBC (uM)	Haemophilus influenzae	n.d	HI	Gram-	Systemic	Bacillus sbtilis	MD	N/A	None	None	0	v	0.324	0	0.046	0.047	HID-0.1%-	0.00843435	0.0544116	-0.147	-0.15	0	0.001
946	CuOHIN/AAmpicillin	0.938194	43.2686	0.939135	0.718735	1	0.718925	CHEMBL174	CuO	HI	N/A	Ampicillin	MIC ug.mL-1	-1	50	MBC (uM)	Haemophilus influenzae	n.d	HI	Gram-	Systemic	Bacillus sbtilis	MD	N/A	None	None	0	t	0.324	0	0.046	0.047	HID-0.1%-	0.00843435	0.0544116	-0.147	-0.15	0	0.001
947	CuOHIN/AAmpicillin	0.938194	43.2686	0.939135	0.718735	1	0.718925	CHEMBL174	CuO	HI	N/A	Ampicillin	MIC ug.mL-1	-1	50	MBC (uM)	Haemophilus influenzae	n.d	HI	Gram-	Systemic	Bacillus sbtilis	MD	N/A	None	None	0	t	0.324	0	0.046	0.047	HID-0.1%-	0.00843435	0.0544116	-0.147	-0.15	0	0.001
948	CuOHIN/AAmpicillin	0.938194	43.2686	0.939135	0.718735	1	0.718925	CHEMBL174	CuO	HI	N/A	Ampicillin	MIC ug.mL-1	-1	50	MBC (uM)	Haemophilus influenzae	n.d	HI	Gram-	Systemic	Bacillus sbtilis	MD	N/A	None	None	0	t	0.324	0	0.046	0.047	HID-0.1%-	0.00843435	0.0544116	-0.147	-0.15	0	0.001
949	CuOHIN/AAmpicillin	0.938194	43.2686	0.939135	0.718735	1	0.718925	CHEMBL174	CuO	HI	N/A	Ampicillin	MIC ug.mL-1	-1	50	MBC (uM)	Haemophilus influenzae	n.d	HI	Gram-	Systemic	Bacillus sbtilis	MD	N/A	None	None	0	v	0.324	0	0.046	0.047	HID-0.1%-	0.00843435	0.0544116	-0.147	-0.15	0	0.001
950	CuOHIN/AAmpicillin	0.938194	43.2686	0.939135	0.718735	1	0.718925	CHEMBL174	CuO	HI	N/A	Ampicillin	MIC ug.mL-1	-1	50	MBC (uM)	Haemophilus influenzae	n.d	HI	Gram-	Systemic	Bacillus sbtilis	MD	N/A	None	None	0	t	0.324	0	0.046	0.047	HID-0.1%-	0.00843435	0.0544116	-0.147	-0.15	0	0.001
951	CuOHIN/AAmpicillin	1.54864	43.8791	1.54958	0.824717	1	0.824853	CHEMBL174	CuO	HI	N/A	Ampicillin	ED50 mg.kg-1	-1	130.34	MBC (uM)	Haemophilus influenzae	n.d	HI	Gram-	Systemic	Bacillus sbtilis	MD	N/A	None	None	0	t	0.433	0	0.046	0.047	HID-0.1%-	0.00843435	0.0544116	-0.147	-0.15	0	0.001
952	CuOHIN/AAmpicillin	-0.0586789	42.2718	-0.0577374	0.485334	1	0.48557	CHEMBL174	CuO	HI	N/A	Ampicillin	Activity %	1	70	MBC (uM)	Haemophilus influenzae	n.d	HI	Gram-	Systemic	Bacillus sbtilis	MD	N/A	None	None	0	t	0.146	0	0.046	0.047	HID-0.1%-	0.00843435	0.0544116	-0.147	-0.15	0	0.001
953	CuOHIN/AAmpicillin	-0.0586789	42.2718	-0.0577374	0.485334	1	0.48557	CHEMBL174	CuO	HI	N/A	Ampicillin	Activity %	1	70	MBC (uM)	Haemophilus influenzae	n.d	HI	Gram-	Systemic	Bacillus sbtilis	MD	N/A	None	None	0	v	0.146	0	0.046	0.047	HID-0.1%-	0.00843435	0.0544116	-0.147	-0.15	0	0.001
954	CuOHIN/AAmpicillin	-0.0586789	42.2718	-0.0577374	0.485334	1	0.48557	CHEMBL174	CuO	HI	N/A	Ampicillin	Activity %	1	70	MBC (uM)	Haemophilus influenzae	n.d	HI	Gram-	Systemic	Bacillus sbtilis	MD	N/A	None	None	0	t	0.146	0	0.046	0.047	HID-0.1%-	0.00843435	0.0544116	-0.147	-0.15	0	0.001
955	CuHIN/AAmpicillin	-0.287701	42.0427	-0.28676	0.428567	1	0.428797	CHEMBL174	Cu	HI	N/A	Ampicillin	MIC ug.mL-1	-1	50	MBC (uM)	Haemophilus influenzae	MSC01855	HI	Gram-	Systemic	Bacillus subtilis	ATCC6633	Spherical	None	None	0	t	0.324	0	0.046	0.047	HID-0.1%-	0.00843435	0.0544116	-0.147	-0.15	-0.001	0.001
956	CuHIN/AAmpicillin	-0.170093	42.1603	-0.169151	0.457579	1	0.457813	CHEMBL174	Cu	HI	N/A	Ampicillin	MIC90 ug.mL-1	-1	34.891	MBC (uM)	Haemophilus influenzae	n.d	HI	Gram-	Systemic	Bacillus subtilis	ATCC6633	Spherical	None	None	0	t	0.345	0	0.046	0.047	HID-0.1%-	0.00843435	0.0544116	-0.147	-0.15	-0.001	0.001
957	CuHIN/AAmpicillin	-0.170093	42.1603	-0.169151	0.457579	1	0.457813	CHEMBL174	Cu	HI	N/A	Ampicillin	MIC90 ug.mL-1	-1	34.891	MBC (uM)	Haemophilus influenzae	n.d	HI	Gram-	Systemic	Bacillus subtilis	ATCC6633	Spherical	None	None	0	t	0.345	0	0.046	0.047	HID-0.1%-	0.00843435	0.0544116	-0.147	-0.15	-0.001	0.001
958	CuHIN/AAmpicillin	-0.170093	42.1603	-0.169151	0.457579	1	0.457813	CHEMBL174	Cu	HI	N/A	Ampicillin	MIC90 ug.mL-1	-1	34.891	MBC (uM)	Haemophilus influenzae	n.d	HI	Gram-	Systemic	Bacillus subtilis	ATCC6633	Spherical	None	None	0	v	0.345	0	0.046	0.047	HID-0.1%-	0.00843435	0.0544116	-0.147	-0.15	-0.001	0.001
959	CuHIN/AAmpicillin	-0.0132812	42.3172	-0.0123396	0.49668	1	0.496915	CHEMBL174	Cu	HI	N/A	Ampicillin	MIC50 ug.mL-1	-1	21.529	MBC (uM)	Haemophilus influenzae	n.d	HI	Gram-	Systemic	Bacillus subtilis	ATCC6633	Spherical	None	None	0	t	0.373	0	0.046	0.047	HID-0.1%-	0.00843435	0.0544116	-0.147	-0.15	-0.001	0.001
960	CuHIN/AAmpicillin	-0.0132812	42.3172	-0.0123396	0.49668	1	0.496915	CHEMBL174	Cu	HI	N/A	Ampicillin	MIC50 ug.mL-1	-1	21.529	MBC (uM)	Haemophilus influenzae	n.d	HI	Gram-	Systemic	Bacillus subtilis	ATCC6633	Spherical	None	None	0	t	0.373	0	0.046	0.047	HID-0.1%-	0.00843435	0.0544116	-0.147	-0.15	-0.001	0.001
961	CuHIN/AAmpicillin	-0.287701	42.0427	-0.28676	0.428567	1	0.428797	CHEMBL174	Cu	HI	N/A	Ampicillin	MIC ug.mL-1	-1	50	MBC (uM)	Haemophilus influenzae	n.d	HI	Gram-	Systemic	Bacillus subtilis	ATCC6633	Spherical	None	None	0	v	0.324	0	0.046	0.047	HID-0.1%-	0.00843435	0.0544116	-0.147	-0.15	-0.001	0.001
962	CuHIN/AAmpicillin	-0.287701	42.0427	-0.28676	0.428567	1	0.428797	CHEMBL174	Cu	HI	N/A	Ampicillin	MIC ug.mL-1	-1	50	MBC (uM)	Haemophilus influenzae	n.d	HI	Gram-	Systemic	Bacillus subtilis	ATCC6633	Spherical	None	None	0	t	0.324	0	0.046	0.047	HID-0.1%-	0.00843435	0.0544116	-0.147	-0.15	-0.001	0.001
963	CuHIN/AAmpicillin	-0.287701	42.0427	-0.28676	0.428567	1	0.428797	CHEMBL174	Cu	HI	N/A	Ampicillin	MIC ug.mL-1	-1	50	MBC (uM)	Haemophilus influenzae	n.d	HI	Gram-	Systemic	Bacillus subtilis	ATCC6633	Spherical	None	None	0	t	0.324	0	0.046	0.047	HID-0.1%-	0.00843435	0.0544116	-0.147	-0.15	-0.001	0.001
964	CuHIN/AAmpicillin	-0.287701	42.0427	-0.28676	0.428567	1	0.428797	CHEMBL174	Cu	HI	N/A	Ampicillin	MIC ug.mL-1	-1	50	MBC (uM)	Haemophilus influenzae	n.d	HI	Gram-	Systemic	Bacillus subtilis	ATCC6633	Spherical	None	None	0	t	0.324	0	0.046	0.047	HID-0.1%-	0.00843435	0.0544116	-0.147	-0.15	-0.001	0.001
965	CuHIN/AAmpicillin	-0.287701	42.0427	-0.28676	0.428567	1	0.428797	CHEMBL174	Cu	HI	N/A	Ampicillin	MIC ug.mL-1	-1	50	MBC (uM)	Haemophilus influenzae	n.d	HI	Gram-	Systemic	Bacillus subtilis	ATCC6633	Spherical	None	None	0	v	0.324	0	0.046	0.047	HID-0.1%-	0.00843435	0.0544116	-0.147	-0.15	-0.001	0.001
966	CuHIN/AAmpicillin	-1.28457	41.0459	-1.28363	0.216773	1	0.216933	CHEMBL174	Cu	HI	N/A	Ampicillin	Activity %	1	70	MBC (uM)	Haemophilus influenzae	n.d	HI	Gram-	Systemic	Bacillus subtilis	ATCC6633	Spherical	None	None	0	t	0.146	0	0.046	0.047	HID-0.1%-	0.00843435	0.0544116	-0.147	-0.15	-0.001	0.001
967	CuHIN/AAmpicillin	-1.28457	41.0459	-1.28363	0.216773	1	0.216933	CHEMBL174	Cu	HI	N/A	Ampicillin	Activity %	1	70	MBC (uM)	Haemophilus influenzae	n.d	HI	Gram-	Systemic	Bacillus subtilis	ATCC6633	Spherical	None	None	0	t	0.146	0	0.046	0.047	HID-0.1%-	0.00843435	0.0544116	-0.147	-0.15	-0.001	0.001
968	CuHIN/AAmpicillin	-0.743363	41.5871	-0.742421	0.322269	1	0.322475	CHEMBL174	Cu	HI	N/A	Ampicillin	log10cfu -	-1	5.039	MBC (uM)	Haemophilus influenzae	VT450-2006	HI	Gram-	Systemic	Bacillus subtilis	ATCC6633	Spherical	None	None	0	v	0.238	0	0.046	0.047	HID-0.1%-	0.00843435	0.0544116	-0.147	-0.15	-0.001	0.002
969	CuOHIN/AAmpicillin	1.0558	43.3862	1.05674	0.741888	1	0.742068	CHEMBL174	CuO	HI	N/A	Ampicillin	MIC90 ug.mL-1	-1	34.891	MBC (uM)	Haemophilus influenzae	n.d	HI	Gram-	Systemic	Bacillus sbtilis	MD	N/A	None	None	0	t	0.345	0	0.046	0.047	HID-0.1%-	0.00843435	0.0544116	-0.147	-0.15	0	0.001
970	CuOHIN/AAmpicillin	1.0558	43.3862	1.05674	0.741888	1	0.742068	CHEMBL174	CuO	HI	N/A	Ampicillin	MIC90 ug.mL-1	-1	34.891	MBC (uM)	Haemophilus influenzae	n.d	HI	Gram-	Systemic	Bacillus sbtilis	MD	N/A	None	None	0	t	0.345	0	0.046	0.047	HID-0.1%-	0.00843435	0.0544116	-0.147	-0.15	0	0.001
971	CuOHIN/AAmpicillin	1.0558	43.3862	1.05674	0.741888	1	0.742068	CHEMBL174	CuO	HI	N/A	Ampicillin	MIC90 ug.mL-1	-1	34.891	MBC (uM)	Haemophilus influenzae	n.d	HI	Gram-	Systemic	Bacillus sbtilis	MD	N/A	None	None	0	v	0.345	0	0.046	0.047	HID-0.1%-	0.00843435	0.0544116	-0.147	-0.15	0	0.001
972	CuOHIN/AAmpicillin	1.21261	43.5431	1.21356	0.770761	1	0.770927	CHEMBL174	CuO	HI	N/A	Ampicillin	MIC50 ug.mL-1	-1	21.529	MBC (uM)	Haemophilus influenzae	n.d	HI	Gram-	Systemic	Bacillus sbtilis	MD	N/A	None	None	0	t	0.373	0	0.046	0.047	HID-0.1%-	0.00843435	0.0544116	-0.147	-0.15	0	0.001
973	CuOHIN/AAmpicillin	1.21261	43.5431	1.21356	0.770761	1	0.770927	CHEMBL174	CuO	HI	N/A	Ampicillin	MIC50 ug.mL-1	-1	21.529	MBC (uM)	Haemophilus influenzae	n.d	HI	Gram-	Systemic	Bacillus sbtilis	MD	N/A	None	None	0	t	0.373	0	0.046	0.047	HID-0.1%-	0.00843435	0.0544116	-0.147	-0.15	0	0.001
974	CuOHIN/AAmpicillin	0.938194	43.2686	0.939135	0.718735	1	0.718925	CHEMBL174	CuO	HI	N/A	Ampicillin	MIC ug.mL-1	-1	50	MBC (uM)	Haemophilus influenzae	n.d	HI	Gram-	Systemic	Bacillus sbtilis	MD	N/A	None	None	0	t	0.324	0	0.046	0.047	HID-0.1%-	0.00843435	0.0544116	-0.147	-0.15	0	0.001
975	CuOHIN/AAmpicillin	0.938194	43.2686	0.939135	0.718735	1	0.718925	CHEMBL174	CuO	HI	N/A	Ampicillin	MIC ug.mL-1	-1	50	MBC (uM)	Haemophilus influenzae	n.d	HI	Gram-	Systemic	Bacillus sbtilis	MD	N/A	None	None	0	v	0.324	0	0.046	0.047	HID-0.1%-	0.00843435	0.0544116	-0.147	-0.15	0	0.001
976	CuOHIN/AAmpicillin	0.938194	43.2686	0.939135	0.718735	1	0.718925	CHEMBL174	CuO	HI	N/A	Ampicillin	MIC ug.mL-1	-1	50	MBC (uM)	Haemophilus influenzae	n.d	HI	Gram-	Systemic	Bacillus sbtilis	MD	N/A	None	None	0	t	0.324	0	0.046	0.047	HID-0.1%-	0.00843435	0.0544116	-0.147	-0.15	0	0.001
977	CuOHIN/AAmpicillin	0.938194	43.2686	0.939135	0.718735	1	0.718925	CHEMBL174	CuO	HI	N/A	Ampicillin	MIC ug.mL-1	-1	50	MBC (uM)	Haemophilus influenzae	n.d	HI	Gram-	Systemic	Bacillus sbtilis	MD	N/A	None	None	0	t	0.324	0	0.046	0.047	HID-0.1%-	0.00843435	0.0544116	-0.147	-0.15	0	0.001
978	CuOHIN/AAmpicillin	0.938194	43.2686	0.939135	0.718735	1	0.718925	CHEMBL174	CuO	HI	N/A	Ampicillin	MIC ug.mL-1	-1	50	MBC (uM)	Haemophilus influenzae	n.d	HI	Gram-	Systemic	Bacillus sbtilis	MD	N/A	None	None	0	t	0.324	0	0.046	0.047	HID-0.1%-	0.00843435	0.0544116	-0.147	-0.15	0	0.001
979	CuOHIN/AAmpicillin	0.938194	43.2686	0.939135	0.718735	1	0.718925	CHEMBL174	CuO	HI	N/A	Ampicillin	MIC ug.mL-1	-1	50	MBC (uM)	Haemophilus influenzae	n.d	HI	Gram-	Systemic	Bacillus sbtilis	MD	N/A	None	None	0	v	0.324	0	0.046	0.047	HID-0.1%-	0.00843435	0.0544116	-0.147	-0.15	0	0.001
980	CuOHIN/AAmpicillin	-0.0586789	42.2718	-0.0577374	0.485334	1	0.48557	CHEMBL174	CuO	HI	N/A	Ampicillin	Activity %	1	70	MBC (uM)	Haemophilus influenzae	n.d	HI	Gram-	Systemic	Bacillus sbtilis	MD	N/A	None	None	0	t	0.146	0	0.046	0.047	HID-0.1%-	0.00843435	0.0544116	-0.147	-0.15	0	0.001
981	CuOHIN/AAmpicillin	-0.0586789	42.2718	-0.0577374	0.485334	1	0.48557	CHEMBL174	CuO	HI	N/A	Ampicillin	Activity %	1	70	MBC (uM)	Haemophilus influenzae	n.d	HI	Gram-	Systemic	Bacillus sbtilis	MD	N/A	None	None	0	t	0.146	0	0.046	0.047	HID-0.1%-	0.00843435	0.0544116	-0.147	-0.15	0	0.001
982	CuIHIN/AAmpicillin	1.93905	44.2695	1.93999	0.874248	1	0.874351	CHEMBL174	CuI	HI	N/A	Ampicillin	MIC90 ug.mL-1	-1	34.891	MBC (uM)	Haemophilus influenzae	n.d	HI	Gram-	Systemic	Bacillus subtilis	ATCC6633	N/A	None	None	0	t	0.345	0	0.046	0.047	HID-0.1%-	0.00843435	0.0544116	-0.143	-0.15	-0.001	0.001
983	CuIHIN/AAmpicillin	1.93905	44.2695	1.93999	0.874248	1	0.874351	CHEMBL174	CuI	HI	N/A	Ampicillin	MIC90 ug.mL-1	-1	34.891	MBC (uM)	Haemophilus influenzae	n.d	HI	Gram-	Systemic	Bacillus subtilis	ATCC6633	N/A	None	None	0	v	0.345	0	0.046	0.047	HID-0.1%-	0.00843435	0.0544116	-0.143	-0.15	-0.001	0.001
984	CuIHIN/AAmpicillin	2.09586	44.4263	2.0968	0.8905	1	0.890592	CHEMBL174	CuI	HI	N/A	Ampicillin	MIC50 ug.mL-1	-1	21.529	MBC (uM)	Haemophilus influenzae	n.d	HI	Gram-	Systemic	Bacillus subtilis	ATCC6633	N/A	None	None	0	t	0.373	0	0.046	0.047	HID-0.1%-	0.00843435	0.0544116	-0.143	-0.15	-0.001	0.001
985	CuIHIN/AAmpicillin	2.09586	44.4263	2.0968	0.8905	1	0.890592	CHEMBL174	CuI	HI	N/A	Ampicillin	MIC50 ug.mL-1	-1	21.529	MBC (uM)	Haemophilus influenzae	n.d	HI	Gram-	Systemic	Bacillus subtilis	ATCC6633	N/A	None	None	0	t	0.373	0	0.046	0.047	HID-0.1%-	0.00843435	0.0544116	-0.143	-0.15	-0.001	0.001
986	CuIHIN/AAmpicillin	1.82144	44.1519	1.82238	0.860739	1	0.860852	CHEMBL174	CuI	HI	N/A	Ampicillin	MIC ug.mL-1	-1	50	MBC (uM)	Haemophilus influenzae	n.d	HI	Gram-	Systemic	Bacillus subtilis	ATCC6633	N/A	None	None	0	v	0.324	0	0.046	0.047	HID-0.1%-	0.00843435	0.0544116	-0.143	-0.15	-0.001	0.001
987	CuIHIN/AAmpicillin	1.82144	44.1519	1.82238	0.860739	1	0.860852	CHEMBL174	CuI	HI	N/A	Ampicillin	MIC ug.mL-1	-1	50	MBC (uM)	Haemophilus influenzae	n.d	HI	Gram-	Systemic	Bacillus subtilis	ATCC6633	N/A	None	None	0	t	0.324	0	0.046	0.047	HID-0.1%-	0.00843435	0.0544116	-0.143	-0.15	-0.001	0.001
988	CuIHIN/AAmpicillin	1.82144	44.1519	1.82238	0.860739	1	0.860852	CHEMBL174	CuI	HI	N/A	Ampicillin	MIC ug.mL-1	-1	50	MBC (uM)	Haemophilus influenzae	n.d	HI	Gram-	Systemic	Bacillus subtilis	ATCC6633	N/A	None	None	0	t	0.324	0	0.046	0.047	HID-0.1%-	0.00843435	0.0544116	-0.143	-0.15	-0.001	0.001
989	CuIHIN/AAmpicillin	1.82144	44.1519	1.82238	0.860739	1	0.860852	CHEMBL174	CuI	HI	N/A	Ampicillin	MIC ug.mL-1	-1	50	MBC (uM)	Haemophilus influenzae	n.d	HI	Gram-	Systemic	Bacillus subtilis	ATCC6633	N/A	None	None	0	t	0.324	0	0.046	0.047	HID-0.1%-	0.00843435	0.0544116	-0.143	-0.15	-0.001	0.001
990	CuIHIN/AAmpicillin	1.82144	44.1519	1.82238	0.860739	1	0.860852	CHEMBL174	CuI	HI	N/A	Ampicillin	MIC ug.mL-1	-1	50	MBC (uM)	Haemophilus influenzae	n.d	HI	Gram-	Systemic	Bacillus subtilis	ATCC6633	N/A	None	None	0	v	0.324	0	0.046	0.047	HID-0.1%-	0.00843435	0.0544116	-0.143	-0.15	-0.001	0.001
991	CuIHIN/AAmpicillin	0.82457	43.155	0.825511	0.695206	1	0.695405	CHEMBL174	CuI	HI	N/A	Ampicillin	Activity %	1	70	MBC (uM)	Haemophilus influenzae	n.d	HI	Gram-	Systemic	Bacillus subtilis	ATCC6633	N/A	None	None	0	t	0.146	0	0.046	0.047	HID-0.1%-	0.00843435	0.0544116	-0.143	-0.15	-0.001	0.001
992	CuIHIN/AAmpicillin	0.82457	43.155	0.825511	0.695206	1	0.695405	CHEMBL174	CuI	HI	N/A	Ampicillin	Activity %	1	70	MBC (uM)	Haemophilus influenzae	n.d	HI	Gram-	Systemic	Bacillus subtilis	ATCC6633	N/A	None	None	0	t	0.146	0	0.046	0.047	HID-0.1%-	0.00843435	0.0544116	-0.143	-0.15	-0.001	0.001
993	CuIHIN/AAmpicillin	0.82457	43.155	0.825511	0.695206	1	0.695405	CHEMBL174	CuI	HI	N/A	Ampicillin	Activity %	1	70	MBC (uM)	Haemophilus influenzae	n.d	HI	Gram-	Systemic	Bacillus subtilis	ATCC6633	N/A	None	None	0	t	0.146	0	0.046	0.047	HID-0.1%-	0.00843435	0.0544116	-0.143	-0.15	-0.001	0.001
994	CuOHIN/AAmpicillin	0.938194	43.2686	0.939135	0.718735	1	0.718925	CHEMBL174	CuO	HI	N/A	Ampicillin	MIC ug.mL-1	-1	50	MBC (uM)	Haemophilus influenzae	MSC02149	HI	Gram-	Systemic	Bacillus sbtilis	MD	N/A	None	None	0	t	0.324	0	0.046	0.047	HID-0.1%-	0.00843435	0.0544116	-0.147	-0.15	0	0.001
995	CuOHIN/AAmpicillin	0.938194	43.2686	0.939135	0.718735	1	0.718925	CHEMBL174	CuO	HI	N/A	Ampicillin	MIC ug.mL-1	-1	50	MBC (uM)	Haemophilus influenzae	MSC07237	HI	Gram-	Systemic	Bacillus sbtilis	MD	N/A	None	None	0	t	0.324	0	0.046	0.047	HID-0.1%-	0.00843435	0.0544116	-0.147	-0.15	0	0.001
996	CuOHIN/AAmpicillin	1.0558	43.3862	1.05674	0.741888	1	0.742068	CHEMBL174	CuO	HI	N/A	Ampicillin	MIC90 ug.mL-1	-1	34.891	MBC (uM)	Haemophilus influenzae	n.d	HI	Gram-	Systemic	Bacillus sbtilis	MD	N/A	None	None	0	t	0.345	0	0.046	0.047	HID-0.1%-	0.00843435	0.0544116	-0.147	-0.15	0	0.001
997	CuOHIN/AAmpicillin	1.0558	43.3862	1.05674	0.741888	1	0.742068	CHEMBL174	CuO	HI	N/A	Ampicillin	MIC90 ug.mL-1	-1	34.891	MBC (uM)	Haemophilus influenzae	n.d	HI	Gram-	Systemic	Bacillus sbtilis	MD	N/A	None	None	0	v	0.345	0	0.046	0.047	HID-0.1%-	0.00843435	0.0544116	-0.147	-0.15	0	0.001
998	CuOHIN/AAmpicillin	1.21261	43.5431	1.21356	0.770761	1	0.770927	CHEMBL174	CuO	HI	N/A	Ampicillin	MIC50 ug.mL-1	-1	21.529	MBC (uM)	Haemophilus influenzae	n.d	HI	Gram-	Systemic	Bacillus sbtilis	MD	N/A	None	None	0	t	0.373	0	0.046	0.047	HID-0.1%-	0.00843435	0.0544116	-0.147	-0.15	0	0.001
999	CuOHIN/AAmpicillin	1.21261	43.5431	1.21356	0.770761	1	0.770927	CHEMBL174	CuO	HI	N/A	Ampicillin	MIC50 ug.mL-1	-1	21.529	MBC (uM)	Haemophilus influenzae	n.d	HI	Gram-	Systemic	Bacillus sbtilis	MD	N/A	None	None	0	t	0.373	0	0.046	0.047	HID-0.1%-	0.00843435	0.0544116	-0.147	-0.15	0	0.001
1000	CuOHIN/AAmpicillin	1.21261	43.5431	1.21356	0.770761	1	0.770927	CHEMBL174	CuO	HI	N/A	Ampicillin	MIC50 ug.mL-1	-1	21.529	MBC (uM)	Haemophilus influenzae	n.d	HI	Gram-	Systemic	Bacillus sbtilis	MD	N/A	None	None	0	t	0.373	0	0.046	0.047	HID-0.1%-	0.00843435	0.0544116	-0.147	-0.15	0	0.001
1001	CuOHIN/AAmpicillin	0.938194	43.2686	0.939135	0.718735	1	0.718925	CHEMBL174	CuO	HI	N/A	Ampicillin	MIC ug.mL-1	-1	50	MBC (uM)	Haemophilus influenzae	n.d	HI	Gram-	Systemic	Bacillus sbtilis	MD	N/A	None	None	0	v	0.324	0	0.046	0.047	HID-0.1%-	0.00843435	0.0544116	-0.147	-0.15	0	0.001
1002	CuOHIN/AAmpicillin	0.938194	43.2686	0.939135	0.718735	1	0.718925	CHEMBL174	CuO	HI	N/A	Ampicillin	MIC ug.mL-1	-1	50	MBC (uM)	Haemophilus influenzae	n.d	HI	Gram-	Systemic	Bacillus sbtilis	MD	N/A	None	None	0	t	0.324	0	0.046	0.047	HID-0.1%-	0.00843435	0.0544116	-0.147	-0.15	0	0.001
1003	CuOHIN/AAmpicillin	0.938194	43.2686	0.939135	0.718735	1	0.718925	CHEMBL174	CuO	HI	N/A	Ampicillin	MIC ug.mL-1	-1	50	MBC (uM)	Haemophilus influenzae	n.d	HI	Gram-	Systemic	Bacillus sbtilis	MD	N/A	None	None	0	t	0.324	0	0.046	0.047	HID-0.1%-	0.00843435	0.0544116	-0.147	-0.15	0	0.001
1004	CuOHIN/AAmpicillin	0.938194	43.2686	0.939135	0.718735	1	0.718925	CHEMBL174	CuO	HI	N/A	Ampicillin	MIC ug.mL-1	-1	50	MBC (uM)	Haemophilus influenzae	n.d	HI	Gram-	Systemic	Bacillus sbtilis	MD	N/A	None	None	0	v	0.324	0	0.046	0.047	HID-0.1%-	0.00843435	0.0544116	-0.147	-0.15	0	0.001
1005	CuOHIN/AAmpicillin	0.938194	43.2686	0.939135	0.718735	1	0.718925	CHEMBL174	CuO	HI	N/A	Ampicillin	MIC ug.mL-1	-1	50	MBC (uM)	Haemophilus influenzae	n.d	HI	Gram-	Systemic	Bacillus sbtilis	MD	N/A	None	None	0	t	0.324	0	0.046	0.047	HID-0.1%-	0.00843435	0.0544116	-0.147	-0.15	0	0.001
1006	CuOHIN/AAmpicillin	-0.0586789	42.2718	-0.0577374	0.485334	1	0.48557	CHEMBL174	CuO	HI	N/A	Ampicillin	Activity %	1	70	MBC (uM)	Haemophilus influenzae	n.d	HI	Gram-	Systemic	Bacillus sbtilis	MD	N/A	None	None	0	t	0.146	0	0.046	0.047	HID-0.1%-	0.00843435	0.0544116	-0.147	-0.15	0	0.001
1007	CuOHIN/AAmpicillin	0.938194	43.2686	0.939135	0.718735	1	0.718925	CHEMBL174	CuO	HI	N/A	Ampicillin	MIC ug.mL-1	-1	50	MBC (uM)	Haemophilus influenzae	Rd	HI	Gram-	Systemic	Bacillus sbtilis	MD	N/A	None	None	0	v	0.324	0	0.046	0.047	HID-0.1%-	0.00843435	0.0544116	-0.147	-0.15	0	0.001
1008	CuOHIN/AAmpicillin	0.938194	43.2686	0.939135	0.718735	1	0.718925	CHEMBL174	CuO	HI	N/A	Ampicillin	MIC ug.mL-1	-1	50	MBC (uM)	Haemophilus influenzae	MSC01363	HI	Gram-	Systemic	Bacillus sbtilis	MD	N/A	None	None	0	t	0.324	0	0.046	0.047	HID-0.1%-	0.00843435	0.0544116	-0.147	-0.15	0	0.001
1009	CuOHIN/AAmpicillin	1.0558	43.3862	1.05674	0.741888	1	0.742068	CHEMBL174	CuO	HI	N/A	Ampicillin	MIC90 ug.mL-1	-1	34.891	MBC (uM)	Haemophilus influenzae	n.d	HI	Gram-	Systemic	Bacillus sbtilis	MD	N/A	None	None	0	t	0.345	0	0.046	0.047	HID-0.1%-	0.00843435	0.0544116	-0.147	-0.15	0	0.001
1010	CuOHIN/AAmpicillin	1.0558	43.3862	1.05674	0.741888	1	0.742068	CHEMBL174	CuO	HI	N/A	Ampicillin	MIC90 ug.mL-1	-1	34.891	MBC (uM)	Haemophilus influenzae	n.d	HI	Gram-	Systemic	Bacillus sbtilis	MD	N/A	None	None	0	v	0.345	0	0.046	0.047	HID-0.1%-	0.00843435	0.0544116	-0.147	-0.15	0	0.001
1011	CuOHIN/AAmpicillin	1.21261	43.5431	1.21356	0.770761	1	0.770927	CHEMBL174	CuO	HI	N/A	Ampicillin	MIC50 ug.mL-1	-1	21.529	MBC (uM)	Haemophilus influenzae	n.d	HI	Gram-	Systemic	Bacillus sbtilis	MD	N/A	None	None	0	t	0.373	0	0.046	0.047	HID-0.1%-	0.00843435	0.0544116	-0.147	-0.15	0	0.001
1012	CuOHIN/AAmpicillin	1.21261	43.5431	1.21356	0.770761	1	0.770927	CHEMBL174	CuO	HI	N/A	Ampicillin	MIC50 ug.mL-1	-1	21.529	MBC (uM)	Haemophilus influenzae	n.d	HI	Gram-	Systemic	Bacillus sbtilis	MD	N/A	None	None	0	t	0.373	0	0.046	0.047	HID-0.1%-	0.00843435	0.0544116	-0.147	-0.15	0	0.001
1013	CuOHIN/AAmpicillin	1.21261	43.5431	1.21356	0.770761	1	0.770927	CHEMBL174	CuO	HI	N/A	Ampicillin	MIC50 ug.mL-1	-1	21.529	MBC (uM)	Haemophilus influenzae	n.d	HI	Gram-	Systemic	Bacillus sbtilis	MD	N/A	None	None	0	t	0.373	0	0.046	0.047	HID-0.1%-	0.00843435	0.0544116	-0.147	-0.15	0	0.001
1014	CuOHIN/AAmpicillin	0.938194	43.2686	0.939135	0.718735	1	0.718925	CHEMBL174	CuO	HI	N/A	Ampicillin	MIC ug.mL-1	-1	50	MBC (uM)	Haemophilus influenzae	n.d	HI	Gram-	Systemic	Bacillus sbtilis	MD	N/A	None	None	0	v	0.324	0	0.046	0.047	HID-0.1%-	0.00843435	0.0544116	-0.147	-0.15	0	0.001
1015	CuOHIN/AAmpicillin	0.938194	43.2686	0.939135	0.718735	1	0.718925	CHEMBL174	CuO	HI	N/A	Ampicillin	MIC ug.mL-1	-1	50	MBC (uM)	Haemophilus influenzae	n.d	HI	Gram-	Systemic	Bacillus sbtilis	MD	N/A	None	None	0	t	0.324	0	0.046	0.047	HID-0.1%-	0.00843435	0.0544116	-0.147	-0.15	0	0.001
1016	CuOHIN/AAmpicillin	0.938194	43.2686	0.939135	0.718735	1	0.718925	CHEMBL174	CuO	HI	N/A	Ampicillin	MIC ug.mL-1	-1	50	MBC (uM)	Haemophilus influenzae	n.d	HI	Gram-	Systemic	Bacillus sbtilis	MD	N/A	None	None	0	t	0.324	0	0.046	0.047	HID-0.1%-	0.00843435	0.0544116	-0.147	-0.15	0	0.001
1017	CuOHIN/AAmpicillin	0.938194	43.2686	0.939135	0.718735	1	0.718925	CHEMBL174	CuO	HI	N/A	Ampicillin	MIC ug.mL-1	-1	50	MBC (uM)	Haemophilus influenzae	n.d	HI	Gram-	Systemic	Bacillus sbtilis	MD	N/A	None	None	0	v	0.324	0	0.046	0.047	HID-0.1%-	0.00843435	0.0544116	-0.147	-0.15	0	0.001
1018	CuOHIN/AAmpicillin	-0.0586789	42.2718	-0.0577374	0.485334	1	0.48557	CHEMBL174	CuO	HI	N/A	Ampicillin	Activity %	1	70	MBC (uM)	Haemophilus influenzae	n.d	HI	Gram-	Systemic	Bacillus sbtilis	MD	N/A	None	None	0	t	0.146	0	0.046	0.047	HID-0.1%-	0.00843435	0.0544116	-0.147	-0.15	0	0.001
1019	CuOHIN/AAmpicillin	0.938194	43.2686	0.939135	0.718735	1	0.718925	CHEMBL174	CuO	HI	N/A	Ampicillin	MIC ug.mL-1	-1	50	MBC (uM)	Haemophilus influenzae	RdRIF	HI	Gram-	Systemic	Bacillus sbtilis	MD	N/A	None	None	0	t	0.324	0	0.046	0.047	HID-0.1%-	0.00843435	0.0544116	-0.147	-0.15	0	0.001
1020	CuHIN/AAmpicillin	0.27234	42.6028	0.273281	0.567667	1	0.567898	CHEMBL174	Cu	HI	N/A	Ampicillin	MIC ug.mL-1	-1	50	MIC (uM)	Haemophilus influenzae	MSC01869	HI	Gram-	Systemic	Bacillus subtilis	ATCC6633	Spherical	None	None	0	t	0.424	0	0.046	0.047	HID-0.1%-	0.00843435	0.0544116	-0.147	-0.15	-0.001	0.001
1021	CuHIN/AAmpicillin	0.429151	42.7596	0.430093	0.605671	1	0.605896	CHEMBL174	Cu	HI	N/A	Ampicillin	MIC90 ug.mL-1	-1	34.891	MIC (uM)	Haemophilus influenzae	n.d	HI	Gram-	Systemic	Bacillus subtilis	ATCC6633	Spherical	None	None	0	t	0.452	0	0.046	0.047	HID-0.1%-	0.00843435	0.0544116	-0.147	-0.15	-0.001	0.001
1022	CuHIN/AAmpicillin	0.429151	42.7596	0.430093	0.605671	1	0.605896	CHEMBL174	Cu	HI	N/A	Ampicillin	MIC90 ug.mL-1	-1	34.891	MIC (uM)	Haemophilus influenzae	n.d	HI	Gram-	Systemic	Bacillus subtilis	ATCC6633	Spherical	None	None	0	v	0.452	0	0.046	0.047	HID-0.1%-	0.00843435	0.0544116	-0.147	-0.15	-0.001	0.001
1023	CuHIN/AAmpicillin	0.630766	42.9612	0.631707	0.652663	1	0.652877	CHEMBL174	Cu	HI	N/A	Ampicillin	MIC50 ug.mL-1	-1	21.529	MIC (uM)	Haemophilus influenzae	n.d	HI	Gram-	Systemic	Bacillus subtilis	ATCC6633	Spherical	None	None	0	t	0.488	0	0.046	0.047	HID-0.1%-	0.00843435	0.0544116	-0.147	-0.15	-0.001	0.001
1024	CuHIN/AAmpicillin	0.630766	42.9612	0.631707	0.652663	1	0.652877	CHEMBL174	Cu	HI	N/A	Ampicillin	MIC50 ug.mL-1	-1	21.529	MIC (uM)	Haemophilus influenzae	n.d	HI	Gram-	Systemic	Bacillus subtilis	ATCC6633	Spherical	None	None	0	t	0.488	0	0.046	0.047	HID-0.1%-	0.00843435	0.0544116	-0.147	-0.15	-0.001	0.001
1025	CuHIN/AAmpicillin	0.630766	42.9612	0.631707	0.652663	1	0.652877	CHEMBL174	Cu	HI	N/A	Ampicillin	MIC50 ug.mL-1	-1	21.529	MIC (uM)	Haemophilus influenzae	n.d	HI	Gram-	Systemic	Bacillus subtilis	ATCC6633	Spherical	None	None	0	t	0.488	0	0.046	0.047	HID-0.1%-	0.00843435	0.0544116	-0.147	-0.15	-0.001	0.001
1026	CuHIN/AAmpicillin	0.27234	42.6028	0.273281	0.567667	1	0.567898	CHEMBL174	Cu	HI	N/A	Ampicillin	MIC ug.mL-1	-1	50	MIC (uM)	Haemophilus influenzae	n.d	HI	Gram-	Systemic	Bacillus subtilis	ATCC6633	Spherical	None	None	0	v	0.424	0	0.046	0.047	HID-0.1%-	0.00843435	0.0544116	-0.147	-0.15	-0.001	0.001
1027	CuHIN/AAmpicillin	0.27234	42.6028	0.273281	0.567667	1	0.567898	CHEMBL174	Cu	HI	N/A	Ampicillin	MIC ug.mL-1	-1	50	MIC (uM)	Haemophilus influenzae	n.d	HI	Gram-	Systemic	Bacillus subtilis	ATCC6633	Spherical	None	None	0	t	0.424	0	0.046	0.047	HID-0.1%-	0.00843435	0.0544116	-0.147	-0.15	-0.001	0.001
1028	CuHIN/AAmpicillin	0.27234	42.6028	0.273281	0.567667	1	0.567898	CHEMBL174	Cu	HI	N/A	Ampicillin	MIC ug.mL-1	-1	50	MIC (uM)	Haemophilus influenzae	n.d	HI	Gram-	Systemic	Bacillus subtilis	ATCC6633	Spherical	None	None	0	t	0.424	0	0.046	0.047	HID-0.1%-	0.00843435	0.0544116	-0.147	-0.15	-0.001	0.001
1029	CuHIN/AAmpicillin	0.27234	42.6028	0.273281	0.567667	1	0.567898	CHEMBL174	Cu	HI	N/A	Ampicillin	MIC ug.mL-1	-1	50	MIC (uM)	Haemophilus influenzae	n.d	HI	Gram-	Systemic	Bacillus subtilis	ATCC6633	Spherical	None	None	0	t	0.424	0	0.046	0.047	HID-0.1%-	0.00843435	0.0544116	-0.147	-0.15	-0.001	0.001
1030	CuHIN/AAmpicillin	0.27234	42.6028	0.273281	0.567667	1	0.567898	CHEMBL174	Cu	HI	N/A	Ampicillin	MIC ug.mL-1	-1	50	MIC (uM)	Haemophilus influenzae	n.d	HI	Gram-	Systemic	Bacillus subtilis	ATCC6633	Spherical	None	None	0	v	0.424	0	0.046	0.047	HID-0.1%-	0.00843435	0.0544116	-0.147	-0.15	-0.001	0.001
1031	CuHIN/AAmpicillin	-1.03256	41.2979	-1.03161	0.262589	1	0.262771	CHEMBL174	Cu	HI	N/A	Ampicillin	Activity %	1	70	MIC (uM)	Haemophilus influenzae	n.d	HI	Gram-	Systemic	Bacillus subtilis	ATCC6633	Spherical	None	None	0	t	0.191	0	0.046	0.047	HID-0.1%-	0.00843435	0.0544116	-0.147	-0.15	-0.001	0.001
1032	CuHIN/AAmpicillin	-1.03256	41.2979	-1.03161	0.262589	1	0.262771	CHEMBL174	Cu	HI	N/A	Ampicillin	Activity %	1	70	MIC (uM)	Haemophilus influenzae	n.d	HI	Gram-	Systemic	Bacillus subtilis	ATCC6633	Spherical	None	None	0	t	0.191	0	0.046	0.047	HID-0.1%-	0.00843435	0.0544116	-0.147	-0.15	-0.001	0.001
1033	CuHIN/AAmpicillin	-1.03256	41.2979	-1.03161	0.262589	1	0.262771	CHEMBL174	Cu	HI	N/A	Ampicillin	Activity %	1	70	MIC (uM)	Haemophilus influenzae	n.d	HI	Gram-	Systemic	Bacillus subtilis	ATCC6633	Spherical	None	None	0	t	0.191	0	0.046	0.047	HID-0.1%-	0.00843435	0.0544116	-0.147	-0.15	-0.001	0.001
1034	AgHIN/AAmpicillin	2.40659	44.737	2.40754	0.917329	1	0.9174	CHEMBL174	Ag	HI	N/A	Ampicillin	MIC90 ug.mL-1	-1	34.891	MIC (uM)	Haemophilus influenzae	n.d	HI	Gram-	Systemic	Bacillus subtilis	ATCC6633	Spherical	None	None	0	t	0.452	0	0.046	0.047	HID-0.1%-	0.00843435	0.0544116	-0.147	-0.135	-0.001	0.001
1035	AgHIN/AAmpicillin	2.40659	44.737	2.40754	0.917329	1	0.9174	CHEMBL174	Ag	HI	N/A	Ampicillin	MIC90 ug.mL-1	-1	34.891	MIC (uM)	Haemophilus influenzae	n.d	HI	Gram-	Systemic	Bacillus subtilis	ATCC6633	Spherical	None	None	0	t	0.452	0	0.046	0.047	HID-0.1%-	0.00843435	0.0544116	-0.147	-0.135	-0.001	0.001
1036	AgHIN/AAmpicillin	2.60821	44.9386	2.60915	0.931388	1	0.931448	CHEMBL174	Ag	HI	N/A	Ampicillin	MIC50 ug.mL-1	-1	21.529	MIC (uM)	Haemophilus influenzae	n.d	HI	Gram-	Systemic	Bacillus subtilis	ATCC6633	Spherical	None	None	0	v	0.488	0	0.046	0.047	HID-0.1%-	0.00843435	0.0544116	-0.147	-0.135	-0.001	0.001
1037	AgHIN/AAmpicillin	2.60821	44.9386	2.60915	0.931388	1	0.931448	CHEMBL174	Ag	HI	N/A	Ampicillin	MIC50 ug.mL-1	-1	21.529	MIC (uM)	Haemophilus influenzae	n.d	HI	Gram-	Systemic	Bacillus subtilis	ATCC6633	Spherical	None	None	0	t	0.488	0	0.046	0.047	HID-0.1%-	0.00843435	0.0544116	-0.147	-0.135	-0.001	0.001
1038	AgHIN/AAmpicillin	2.60821	44.9386	2.60915	0.931388	1	0.931448	CHEMBL174	Ag	HI	N/A	Ampicillin	MIC50 ug.mL-1	-1	21.529	MIC (uM)	Haemophilus influenzae	n.d	HI	Gram-	Systemic	Bacillus subtilis	ATCC6633	Spherical	None	None	0	t	0.488	0	0.046	0.047	HID-0.1%-	0.00843435	0.0544116	-0.147	-0.135	-0.001	0.001
1039	AgHIN/AAmpicillin	2.24978	44.5802	2.25072	0.904632	1	0.904713	CHEMBL174	Ag	HI	N/A	Ampicillin	MIC ug.mL-1	-1	50	MIC (uM)	Haemophilus influenzae	n.d	HI	Gram-	Systemic	Bacillus subtilis	ATCC6633	Spherical	None	None	0	t	0.424	0	0.046	0.047	HID-0.1%-	0.00843435	0.0544116	-0.147	-0.135	-0.001	0.001
1040	AgHIN/AAmpicillin	2.24978	44.5802	2.25072	0.904632	1	0.904713	CHEMBL174	Ag	HI	N/A	Ampicillin	MIC ug.mL-1	-1	50	MIC (uM)	Haemophilus influenzae	n.d	HI	Gram-	Systemic	Bacillus subtilis	ATCC6633	Spherical	None	None	0	v	0.424	0	0.046	0.047	HID-0.1%-	0.00843435	0.0544116	-0.147	-0.135	-0.001	0.001
1041	AgHIN/AAmpicillin	2.24978	44.5802	2.25072	0.904632	1	0.904713	CHEMBL174	Ag	HI	N/A	Ampicillin	MIC ug.mL-1	-1	50	MIC (uM)	Haemophilus influenzae	n.d	HI	Gram-	Systemic	Bacillus subtilis	ATCC6633	Spherical	None	None	0	t	0.424	0	0.046	0.047	HID-0.1%-	0.00843435	0.0544116	-0.147	-0.135	-0.001	0.001
1042	AgHIN/AAmpicillin	2.24978	44.5802	2.25072	0.904632	1	0.904713	CHEMBL174	Ag	HI	N/A	Ampicillin	MIC ug.mL-1	-1	50	MIC (uM)	Haemophilus influenzae	n.d	HI	Gram-	Systemic	Bacillus subtilis	ATCC6633	Spherical	None	None	0	t	0.424	0	0.046	0.047	HID-0.1%-	0.00843435	0.0544116	-0.147	-0.135	-0.001	0.001
1043	AgHIN/AAmpicillin	2.24978	44.5802	2.25072	0.904632	1	0.904713	CHEMBL174	Ag	HI	N/A	Ampicillin	MIC ug.mL-1	-1	50	MIC (uM)	Haemophilus influenzae	n.d	HI	Gram-	Systemic	Bacillus subtilis	ATCC6633	Spherical	None	None	0	t	0.424	0	0.046	0.047	HID-0.1%-	0.00843435	0.0544116	-0.147	-0.135	-0.001	0.001
1044	AgHIN/AAmpicillin	0.944888	43.2753	0.945829	0.720086	1	0.720276	CHEMBL174	Ag	HI	N/A	Ampicillin	Activity %	1	70	MIC (uM)	Haemophilus influenzae	n.d	HI	Gram-	Systemic	Bacillus subtilis	ATCC6633	Spherical	None	None	0	v	0.191	0	0.046	0.047	HID-0.1%-	0.00843435	0.0544116	-0.147	-0.135	-0.001	0.001
1045	AgHIN/AAmpicillin	0.944888	43.2753	0.945829	0.720086	1	0.720276	CHEMBL174	Ag	HI	N/A	Ampicillin	Activity %	1	70	MIC (uM)	Haemophilus influenzae	n.d	HI	Gram-	Systemic	Bacillus subtilis	ATCC6633	Spherical	None	None	0	t	0.191	0	0.046	0.047	HID-0.1%-	0.00843435	0.0544116	-0.147	-0.135	-0.001	0.001
1046	AgHIN/AAmpicillin	0.944888	43.2753	0.945829	0.720086	1	0.720276	CHEMBL174	Ag	HI	N/A	Ampicillin	Activity %	1	70	MIC (uM)	Haemophilus influenzae	n.d	HI	Gram-	Systemic	Bacillus subtilis	ATCC6633	Spherical	None	None	0	t	0.191	0	0.046	0.047	HID-0.1%-	0.00843435	0.0544116	-0.147	-0.135	-0.001	0.001
1047	CuOHIN/AAmpicillin	1.49823	43.8287	1.49918	0.817311	1	0.817452	CHEMBL174	CuO	HI	N/A	Ampicillin	MIC ug.mL-1	-1	50	MIC (uM)	Haemophilus influenzae	MSC07771	HI	Gram-	Systemic	Bacillus sbtilis	MD	N/A	None	None	0	v	0.424	0	0.046	0.047	HID-0.1%-	0.00843435	0.0544116	-0.147	-0.15	0	0.001
1048	CuOHIN/AAmpicillin	1.65505	43.9855	1.65599	0.839572	1	0.839699	CHEMBL174	CuO	HI	N/A	Ampicillin	MIC90 ug.mL-1	-1	34.891	MIC (uM)	Haemophilus influenzae	n.d	HI	Gram-	Systemic	Bacillus sbtilis	MD	N/A	None	None	0	t	0.452	0	0.046	0.047	HID-0.1%-	0.00843435	0.0544116	-0.147	-0.15	0	0.001
1049	CuOHIN/AAmpicillin	1.65505	43.9855	1.65599	0.839572	1	0.839699	CHEMBL174	CuO	HI	N/A	Ampicillin	MIC90 ug.mL-1	-1	34.891	MIC (uM)	Haemophilus influenzae	n.d	HI	Gram-	Systemic	Bacillus sbtilis	MD	N/A	None	None	0	t	0.452	0	0.046	0.047	HID-0.1%-	0.00843435	0.0544116	-0.147	-0.15	0	0.001
1050	CuOHIN/AAmpicillin	1.85666	44.1871	1.8576	0.864907	1	0.865017	CHEMBL174	CuO	HI	N/A	Ampicillin	MIC50 ug.mL-1	-1	21.529	MIC (uM)	Haemophilus influenzae	n.d	HI	Gram-	Systemic	Bacillus sbtilis	MD	N/A	None	None	0	t	0.488	0	0.046	0.047	HID-0.1%-	0.00843435	0.0544116	-0.147	-0.15	0	0.001
1051	CuOHIN/AAmpicillin	1.85666	44.1871	1.8576	0.864907	1	0.865017	CHEMBL174	CuO	HI	N/A	Ampicillin	MIC50 ug.mL-1	-1	21.529	MIC (uM)	Haemophilus influenzae	n.d	HI	Gram-	Systemic	Bacillus sbtilis	MD	N/A	None	None	0	v	0.488	0	0.046	0.047	HID-0.1%-	0.00843435	0.0544116	-0.147	-0.15	0	0.001
1052	CuOHIN/AAmpicillin	1.85666	44.1871	1.8576	0.864907	1	0.865017	CHEMBL174	CuO	HI	N/A	Ampicillin	MIC50 ug.mL-1	-1	21.529	MIC (uM)	Haemophilus influenzae	n.d	HI	Gram-	Systemic	Bacillus sbtilis	MD	N/A	None	None	0	t	0.488	0	0.046	0.047	HID-0.1%-	0.00843435	0.0544116	-0.147	-0.15	0	0.001
1053	CuOHIN/AAmpicillin	1.49823	43.8287	1.49918	0.817311	1	0.817452	CHEMBL174	CuO	HI	N/A	Ampicillin	MIC ug.mL-1	-1	50	MIC (uM)	Haemophilus influenzae	n.d	HI	Gram-	Systemic	Bacillus sbtilis	MD	N/A	None	None	0	t	0.424	0	0.046	0.047	HID-0.1%-	0.00843435	0.0544116	-0.147	-0.15	0	0.001
1054	CuOHIN/AAmpicillin	1.49823	43.8287	1.49918	0.817311	1	0.817452	CHEMBL174	CuO	HI	N/A	Ampicillin	MIC ug.mL-1	-1	50	MIC (uM)	Haemophilus influenzae	n.d	HI	Gram-	Systemic	Bacillus sbtilis	MD	N/A	None	None	0	t	0.424	0	0.046	0.047	HID-0.1%-	0.00843435	0.0544116	-0.147	-0.15	0	0.001
1055	CuOHIN/AAmpicillin	1.49823	43.8287	1.49918	0.817311	1	0.817452	CHEMBL174	CuO	HI	N/A	Ampicillin	MIC ug.mL-1	-1	50	MIC (uM)	Haemophilus influenzae	n.d	HI	Gram-	Systemic	Bacillus sbtilis	MD	N/A	None	None	0	v	0.424	0	0.046	0.047	HID-0.1%-	0.00843435	0.0544116	-0.147	-0.15	0	0.001
1056	CuOHIN/AAmpicillin	1.49823	43.8287	1.49918	0.817311	1	0.817452	CHEMBL174	CuO	HI	N/A	Ampicillin	MIC ug.mL-1	-1	50	MIC (uM)	Haemophilus influenzae	n.d	HI	Gram-	Systemic	Bacillus sbtilis	MD	N/A	None	None	0	t	0.424	0	0.046	0.047	HID-0.1%-	0.00843435	0.0544116	-0.147	-0.15	0	0.001
1057	CuOHIN/AAmpicillin	1.49823	43.8287	1.49918	0.817311	1	0.817452	CHEMBL174	CuO	HI	N/A	Ampicillin	MIC ug.mL-1	-1	50	MIC (uM)	Haemophilus influenzae	n.d	HI	Gram-	Systemic	Bacillus sbtilis	MD	N/A	None	None	0	t	0.424	0	0.046	0.047	HID-0.1%-	0.00843435	0.0544116	-0.147	-0.15	0	0.001
1058	CuOHIN/AAmpicillin	0.193339	42.5238	0.194281	0.548185	1	0.548418	CHEMBL174	CuO	HI	N/A	Ampicillin	Activity %	1	70	MIC (uM)	Haemophilus influenzae	n.d	HI	Gram-	Systemic	Bacillus sbtilis	MD	N/A	None	None	0	v	0.191	0	0.046	0.047	HID-0.1%-	0.00843435	0.0544116	-0.147	-0.15	0	0.001
1059	CuOHIN/AAmpicillin	1.52421	43.8546	1.52515	0.821157	1	0.821296	CHEMBL174	CuO	HI	N/A	Ampicillin	MIC ug.mL-1	-1	50	MIC (uM)	Haemophilus influenzae	VT450-2006	HI	Gram-	Systemic	Bacillus sbtilis	MD	N/A	None	None	0	t	0.424	0	0.046	0.047	HID-0.1%-	0.00843435	0.0544116	-0.147	-0.15	0	0.002
1060	CuOHIN/AAmpicillin	1.49823	43.8287	1.49918	0.817311	1	0.817452	CHEMBL174	CuO	HI	N/A	Ampicillin	MIC ug.mL-1	-1	50	MIC (uM)	Haemophilus influenzae	MSC01400	HI	Gram-	Systemic	Bacillus sbtilis	MD	N/A	None	None	0	v	0.424	0	0.046	0.047	HID-0.1%-	0.00843435	0.0544116	-0.147	-0.15	0	0.001
1061	CuOHIN/AAmpicillin	1.65505	43.9855	1.65599	0.839572	1	0.839699	CHEMBL174	CuO	HI	N/A	Ampicillin	MIC90 ug.mL-1	-1	34.891	MIC (uM)	Haemophilus influenzae	n.d	HI	Gram-	Systemic	Bacillus sbtilis	MD	N/A	None	None	0	t	0.452	0	0.046	0.047	HID-0.1%-	0.00843435	0.0544116	-0.147	-0.15	0	0.001
1062	CuOHIN/AAmpicillin	1.65505	43.9855	1.65599	0.839572	1	0.839699	CHEMBL174	CuO	HI	N/A	Ampicillin	MIC90 ug.mL-1	-1	34.891	MIC (uM)	Haemophilus influenzae	n.d	HI	Gram-	Systemic	Bacillus sbtilis	MD	N/A	None	None	0	t	0.452	0	0.046	0.047	HID-0.1%-	0.00843435	0.0544116	-0.147	-0.15	0	0.001
1063	CuOHIN/AAmpicillin	1.65505	43.9855	1.65599	0.839572	1	0.839699	CHEMBL174	CuO	HI	N/A	Ampicillin	MIC90 ug.mL-1	-1	34.891	MIC (uM)	Haemophilus influenzae	n.d	HI	Gram-	Systemic	Bacillus sbtilis	MD	N/A	None	None	0	t	0.452	0	0.046	0.047	HID-0.1%-	0.00843435	0.0544116	-0.147	-0.15	0	0.001
1064	CuOHIN/AAmpicillin	1.85666	44.1871	1.8576	0.864907	1	0.865017	CHEMBL174	CuO	HI	N/A	Ampicillin	MIC50 ug.mL-1	-1	21.529	MIC (uM)	Haemophilus influenzae	n.d	HI	Gram-	Systemic	Bacillus sbtilis	MD	N/A	None	None	0	v	0.488	0	0.046	0.047	HID-0.1%-	0.00843435	0.0544116	-0.147	-0.15	0	0.001
1065	CuOHIN/AAmpicillin	1.85666	44.1871	1.8576	0.864907	1	0.865017	CHEMBL174	CuO	HI	N/A	Ampicillin	MIC50 ug.mL-1	-1	21.529	MIC (uM)	Haemophilus influenzae	n.d	HI	Gram-	Systemic	Bacillus sbtilis	MD	N/A	None	None	0	t	0.488	0	0.046	0.047	HID-0.1%-	0.00843435	0.0544116	-0.147	-0.15	0	0.001
1066	CuOHIN/AAmpicillin	1.85666	44.1871	1.8576	0.864907	1	0.865017	CHEMBL174	CuO	HI	N/A	Ampicillin	MIC50 ug.mL-1	-1	21.529	MIC (uM)	Haemophilus influenzae	n.d	HI	Gram-	Systemic	Bacillus sbtilis	MD	N/A	None	None	0	t	0.488	0	0.046	0.047	HID-0.1%-	0.00843435	0.0544116	-0.147	-0.15	0	0.001
1067	CuOHIN/AAmpicillin	1.49823	43.8287	1.49918	0.817311	1	0.817452	CHEMBL174	CuO	HI	N/A	Ampicillin	MIC ug.mL-1	-1	50	MIC (uM)	Haemophilus influenzae	n.d	HI	Gram-	Systemic	Bacillus sbtilis	MD	N/A	None	None	0	t	0.424	0	0.046	0.047	HID-0.1%-	0.00843435	0.0544116	-0.147	-0.15	0	0.001
1068	CuOHIN/AAmpicillin	1.49823	43.8287	1.49918	0.817311	1	0.817452	CHEMBL174	CuO	HI	N/A	Ampicillin	MIC ug.mL-1	-1	50	MIC (uM)	Haemophilus influenzae	n.d	HI	Gram-	Systemic	Bacillus sbtilis	MD	N/A	None	None	0	v	0.424	0	0.046	0.047	HID-0.1%-	0.00843435	0.0544116	-0.147	-0.15	0	0.001
1069	CuOHIN/AAmpicillin	1.49823	43.8287	1.49918	0.817311	1	0.817452	CHEMBL174	CuO	HI	N/A	Ampicillin	MIC ug.mL-1	-1	50	MIC (uM)	Haemophilus influenzae	n.d	HI	Gram-	Systemic	Bacillus sbtilis	MD	N/A	None	None	0	t	0.424	0	0.046	0.047	HID-0.1%-	0.00843435	0.0544116	-0.147	-0.15	0	0.001
1070	CuOHIN/AAmpicillin	1.49823	43.8287	1.49918	0.817311	1	0.817452	CHEMBL174	CuO	HI	N/A	Ampicillin	MIC ug.mL-1	-1	50	MIC (uM)	Haemophilus influenzae	n.d	HI	Gram-	Systemic	Bacillus sbtilis	MD	N/A	None	None	0	t	0.424	0	0.046	0.047	HID-0.1%-	0.00843435	0.0544116	-0.147	-0.15	0	0.001
1071	CuOHIN/AAmpicillin	1.49823	43.8287	1.49918	0.817311	1	0.817452	CHEMBL174	CuO	HI	N/A	Ampicillin	MIC ug.mL-1	-1	50	MIC (uM)	Haemophilus influenzae	n.d	HI	Gram-	Systemic	Bacillus sbtilis	MD	N/A	None	None	0	t	0.424	0	0.046	0.047	HID-0.1%-	0.00843435	0.0544116	-0.147	-0.15	0	0.001
1072	CuOHIN/AAmpicillin	0.193339	42.5238	0.194281	0.548185	1	0.548418	CHEMBL174	CuO	HI	N/A	Ampicillin	Activity %	1	70	MIC (uM)	Haemophilus influenzae	n.d	HI	Gram-	Systemic	Bacillus sbtilis	MD	N/A	None	None	0	v	0.191	0	0.046	0.047	HID-0.1%-	0.00843435	0.0544116	-0.147	-0.15	0	0.001
1073	CuOHIN/AAmpicillin	0.193339	42.5238	0.194281	0.548185	1	0.548418	CHEMBL174	CuO	HI	N/A	Ampicillin	Activity %	1	70	MIC (uM)	Haemophilus influenzae	n.d	HI	Gram-	Systemic	Bacillus sbtilis	MD	N/A	None	None	0	t	0.191	0	0.046	0.047	HID-0.1%-	0.00843435	0.0544116	-0.147	-0.15	0	0.001
1074	CuIHIN/AAmpicillin	2.38148	44.7119	2.38243	0.915404	1	0.915477	CHEMBL174	CuI	HI	N/A	Ampicillin	MIC ug.mL-1	-1	50	MIC (uM)	Haemophilus influenzae	MSC02022	HI	Gram-	Systemic	Bacillus subtilis	ATCC6633	N/A	None	None	0	v	0.424	0	0.046	0.047	HID-0.1%-	0.00843435	0.0544116	-0.143	-0.15	-0.001	0.001
1075	CuIHIN/AAmpicillin	2.53829	44.8687	2.53924	0.926783	1	0.926847	CHEMBL174	CuI	HI	N/A	Ampicillin	MIC90 ug.mL-1	-1	34.891	MIC (uM)	Haemophilus influenzae	n.d	HI	Gram-	Systemic	Bacillus subtilis	ATCC6633	N/A	None	None	0	t	0.452	0	0.046	0.047	HID-0.1%-	0.00843435	0.0544116	-0.143	-0.15	-0.001	0.001
1076	CuIHIN/AAmpicillin	2.53829	44.8687	2.53924	0.926783	1	0.926847	CHEMBL174	CuI	HI	N/A	Ampicillin	MIC90 ug.mL-1	-1	34.891	MIC (uM)	Haemophilus influenzae	n.d	HI	Gram-	Systemic	Bacillus subtilis	ATCC6633	N/A	None	None	0	t	0.452	0	0.046	0.047	HID-0.1%-	0.00843435	0.0544116	-0.143	-0.15	-0.001	0.001
1077	CuIHIN/AAmpicillin	2.73991	45.0703	2.74085	0.939341	1	0.939395	CHEMBL174	CuI	HI	N/A	Ampicillin	MIC50 ug.mL-1	-1	21.529	MIC (uM)	Haemophilus influenzae	n.d	HI	Gram-	Systemic	Bacillus subtilis	ATCC6633	N/A	None	None	0	v	0.488	0	0.046	0.047	HID-0.1%-	0.00843435	0.0544116	-0.143	-0.15	-0.001	0.001
1078	CuIHIN/AAmpicillin	2.73991	45.0703	2.74085	0.939341	1	0.939395	CHEMBL174	CuI	HI	N/A	Ampicillin	MIC50 ug.mL-1	-1	21.529	MIC (uM)	Haemophilus influenzae	n.d	HI	Gram-	Systemic	Bacillus subtilis	ATCC6633	N/A	None	None	0	t	0.488	0	0.046	0.047	HID-0.1%-	0.00843435	0.0544116	-0.143	-0.15	-0.001	0.001
1079	CuIHIN/AAmpicillin	2.73991	45.0703	2.74085	0.939341	1	0.939395	CHEMBL174	CuI	HI	N/A	Ampicillin	MIC50 ug.mL-1	-1	21.529	MIC (uM)	Haemophilus influenzae	n.d	HI	Gram-	Systemic	Bacillus subtilis	ATCC6633	N/A	None	None	0	t	0.488	0	0.046	0.047	HID-0.1%-	0.00843435	0.0544116	-0.143	-0.15	-0.001	0.001
1080	CuIHIN/AAmpicillin	2.38148	44.7119	2.38243	0.915404	1	0.915477	CHEMBL174	CuI	HI	N/A	Ampicillin	MIC ug.mL-1	-1	50	MIC (uM)	Haemophilus influenzae	n.d	HI	Gram-	Systemic	Bacillus subtilis	ATCC6633	N/A	None	None	0	t	0.424	0	0.046	0.047	HID-0.1%-	0.00843435	0.0544116	-0.143	-0.15	-0.001	0.001
1081	CuIHIN/AAmpicillin	2.38148	44.7119	2.38243	0.915404	1	0.915477	CHEMBL174	CuI	HI	N/A	Ampicillin	MIC ug.mL-1	-1	50	MIC (uM)	Haemophilus influenzae	n.d	HI	Gram-	Systemic	Bacillus subtilis	ATCC6633	N/A	None	None	0	v	0.424	0	0.046	0.047	HID-0.1%-	0.00843435	0.0544116	-0.143	-0.15	-0.001	0.001
1082	CuIHIN/AAmpicillin	2.38148	44.7119	2.38243	0.915404	1	0.915477	CHEMBL174	CuI	HI	N/A	Ampicillin	MIC ug.mL-1	-1	50	MIC (uM)	Haemophilus influenzae	n.d	HI	Gram-	Systemic	Bacillus subtilis	ATCC6633	N/A	None	None	0	t	0.424	0	0.046	0.047	HID-0.1%-	0.00843435	0.0544116	-0.143	-0.15	-0.001	0.001
1083	CuIHIN/AAmpicillin	2.38148	44.7119	2.38243	0.915404	1	0.915477	CHEMBL174	CuI	HI	N/A	Ampicillin	MIC ug.mL-1	-1	50	MIC (uM)	Haemophilus influenzae	n.d	HI	Gram-	Systemic	Bacillus subtilis	ATCC6633	N/A	None	None	0	t	0.424	0	0.046	0.047	HID-0.1%-	0.00843435	0.0544116	-0.143	-0.15	-0.001	0.001
1084	CuIHIN/AAmpicillin	2.38148	44.7119	2.38243	0.915404	1	0.915477	CHEMBL174	CuI	HI	N/A	Ampicillin	MIC ug.mL-1	-1	50	MIC (uM)	Haemophilus influenzae	n.d	HI	Gram-	Systemic	Bacillus subtilis	ATCC6633	N/A	None	None	0	t	0.424	0	0.046	0.047	HID-0.1%-	0.00843435	0.0544116	-0.143	-0.15	-0.001	0.001
1085	CuIHIN/AAmpicillin	1.07659	43.407	1.07753	0.745848	1	0.746026	CHEMBL174	CuI	HI	N/A	Ampicillin	Activity %	1	70	MIC (uM)	Haemophilus influenzae	n.d	HI	Gram-	Systemic	Bacillus subtilis	ATCC6633	N/A	None	None	0	v	0.191	0	0.046	0.047	HID-0.1%-	0.00843435	0.0544116	-0.143	-0.15	-0.001	0.001
1086	CuIHIN/AAmpicillin	1.07659	43.407	1.07753	0.745848	1	0.746026	CHEMBL174	CuI	HI	N/A	Ampicillin	Activity %	1	70	MIC (uM)	Haemophilus influenzae	n.d	HI	Gram-	Systemic	Bacillus subtilis	ATCC6633	N/A	None	None	0	t	0.191	0	0.046	0.047	HID-0.1%-	0.00843435	0.0544116	-0.143	-0.15	-0.001	0.001
1087	CuIHIN/AAmpicillin	1.07659	43.407	1.07753	0.745848	1	0.746026	CHEMBL174	CuI	HI	N/A	Ampicillin	Activity %	1	70	MIC (uM)	Haemophilus influenzae	n.d	HI	Gram-	Systemic	Bacillus subtilis	ATCC6633	N/A	None	None	0	t	0.191	0	0.046	0.047	HID-0.1%-	0.00843435	0.0544116	-0.143	-0.15	-0.001	0.001
1088	CuIHIN/AAmpicillin	2.38148	44.7119	2.38243	0.915404	1	0.915477	CHEMBL174	CuI	HI	N/A	Ampicillin	MIC ug.mL-1	-1	50	MIC (uM)	Haemophilus influenzae	Rd clone	HI	Gram-	Systemic	Bacillus subtilis	ATCC6633	N/A	None	None	0	t	0.424	0	0.046	0.047	HID-0.1%-	0.00843435	0.0544116	-0.143	-0.15	-0.001	0.001
1089	CuOHIN/AAmpicillin	1.65505	43.9855	1.65599	0.839572	1	0.839699	CHEMBL174	CuO	HI	N/A	Ampicillin	MIC90 ug.mL-1	-1	34.891	MIC (uM)	Haemophilus influenzae	n.d	HI	Gram-	Systemic	Bacillus sbtilis	MD	N/A	None	None	0	t	0.452	0	0.046	0.047	HID-0.1%-	0.00843435	0.0544116	-0.147	-0.15	0	0.001
1090	CuOHIN/AAmpicillin	1.65505	43.9855	1.65599	0.839572	1	0.839699	CHEMBL174	CuO	HI	N/A	Ampicillin	MIC90 ug.mL-1	-1	34.891	MIC (uM)	Haemophilus influenzae	n.d	HI	Gram-	Systemic	Bacillus sbtilis	MD	N/A	None	None	0	t	0.452	0	0.046	0.047	HID-0.1%-	0.00843435	0.0544116	-0.147	-0.15	0	0.001
1091	CuOHIN/AAmpicillin	1.65505	43.9855	1.65599	0.839572	1	0.839699	CHEMBL174	CuO	HI	N/A	Ampicillin	MIC90 ug.mL-1	-1	34.891	MIC (uM)	Haemophilus influenzae	n.d	HI	Gram-	Systemic	Bacillus sbtilis	MD	N/A	None	None	0	v	0.452	0	0.046	0.047	HID-0.1%-	0.00843435	0.0544116	-0.147	-0.15	0	0.001
1092	CuOHIN/AAmpicillin	1.85666	44.1871	1.8576	0.864907	1	0.865017	CHEMBL174	CuO	HI	N/A	Ampicillin	MIC50 ug.mL-1	-1	21.529	MIC (uM)	Haemophilus influenzae	n.d	HI	Gram-	Systemic	Bacillus sbtilis	MD	N/A	None	None	0	t	0.488	0	0.046	0.047	HID-0.1%-	0.00843435	0.0544116	-0.147	-0.15	0	0.001
1093	CuOHIN/AAmpicillin	1.85666	44.1871	1.8576	0.864907	1	0.865017	CHEMBL174	CuO	HI	N/A	Ampicillin	MIC50 ug.mL-1	-1	21.529	MIC (uM)	Haemophilus influenzae	n.d	HI	Gram-	Systemic	Bacillus sbtilis	MD	N/A	None	None	0	t	0.488	0	0.046	0.047	HID-0.1%-	0.00843435	0.0544116	-0.147	-0.15	0	0.001
1094	CuOHIN/AAmpicillin	1.85666	44.1871	1.8576	0.864907	1	0.865017	CHEMBL174	CuO	HI	N/A	Ampicillin	MIC50 ug.mL-1	-1	21.529	MIC (uM)	Haemophilus influenzae	n.d	HI	Gram-	Systemic	Bacillus sbtilis	MD	N/A	None	None	0	t	0.488	0	0.046	0.047	HID-0.1%-	0.00843435	0.0544116	-0.147	-0.15	0	0.001
1095	CuOHIN/AAmpicillin	1.49823	43.8287	1.49918	0.817311	1	0.817452	CHEMBL174	CuO	HI	N/A	Ampicillin	MIC ug.mL-1	-1	50	MIC (uM)	Haemophilus influenzae	n.d	HI	Gram-	Systemic	Bacillus sbtilis	MD	N/A	None	None	0	v	0.424	0	0.046	0.047	HID-0.1%-	0.00843435	0.0544116	-0.147	-0.15	0	0.001
1096	CuOHIN/AAmpicillin	1.49823	43.8287	1.49918	0.817311	1	0.817452	CHEMBL174	CuO	HI	N/A	Ampicillin	MIC ug.mL-1	-1	50	MIC (uM)	Haemophilus influenzae	n.d	HI	Gram-	Systemic	Bacillus sbtilis	MD	N/A	None	None	0	t	0.424	0	0.046	0.047	HID-0.1%-	0.00843435	0.0544116	-0.147	-0.15	0	0.001
1097	CuOHIN/AAmpicillin	1.49823	43.8287	1.49918	0.817311	1	0.817452	CHEMBL174	CuO	HI	N/A	Ampicillin	MIC ug.mL-1	-1	50	MIC (uM)	Haemophilus influenzae	n.d	HI	Gram-	Systemic	Bacillus sbtilis	MD	N/A	None	None	0	t	0.424	0	0.046	0.047	HID-0.1%-	0.00843435	0.0544116	-0.147	-0.15	0	0.001
1098	CuOHIN/AAmpicillin	1.49823	43.8287	1.49918	0.817311	1	0.817452	CHEMBL174	CuO	HI	N/A	Ampicillin	MIC ug.mL-1	-1	50	MIC (uM)	Haemophilus influenzae	n.d	HI	Gram-	Systemic	Bacillus sbtilis	MD	N/A	None	None	0	t	0.424	0	0.046	0.047	HID-0.1%-	0.00843435	0.0544116	-0.147	-0.15	0	0.001
1099	CuOHIN/AAmpicillin	1.49823	43.8287	1.49918	0.817311	1	0.817452	CHEMBL174	CuO	HI	N/A	Ampicillin	MIC ug.mL-1	-1	50	MIC (uM)	Haemophilus influenzae	n.d	HI	Gram-	Systemic	Bacillus sbtilis	MD	N/A	None	None	0	v	0.424	0	0.046	0.047	HID-0.1%-	0.00843435	0.0544116	-0.147	-0.15	0	0.001
1100	CuOHIN/AAmpicillin	0.193339	42.5238	0.194281	0.548185	1	0.548418	CHEMBL174	CuO	HI	N/A	Ampicillin	Activity %	1	70	MIC (uM)	Haemophilus influenzae	n.d	HI	Gram-	Systemic	Bacillus sbtilis	MD	N/A	None	None	0	t	0.191	0	0.046	0.047	HID-0.1%-	0.00843435	0.0544116	-0.147	-0.15	0	0.001
1101	CuOHIN/AAmpicillin	0.193339	42.5238	0.194281	0.548185	1	0.548418	CHEMBL174	CuO	HI	N/A	Ampicillin	Activity %	1	70	MIC (uM)	Haemophilus influenzae	n.d	HI	Gram-	Systemic	Bacillus sbtilis	MD	N/A	None	None	0	t	0.191	0	0.046	0.047	HID-0.1%-	0.00843435	0.0544116	-0.147	-0.15	0	0.001
1102	CuOHIN/AAmpicillin	1.49823	43.8287	1.49918	0.817311	1	0.817452	CHEMBL174	CuO	HI	N/A	Ampicillin	MIC ug.mL-1	-1	50	MIC (uM)	Haemophilus influenzae	MSC01432	HI	Gram-	Systemic	Bacillus sbtilis	MD	N/A	None	None	0	v	0.424	0	0.046	0.047	HID-0.1%-	0.00843435	0.0544116	-0.147	-0.15	0	0.001
1103	CuOHIN/AAmpicillin	1.49823	43.8287	1.49918	0.817311	1	0.817452	CHEMBL174	CuO	HI	N/A	Ampicillin	MIC ug.mL-1	-1	50	MIC (uM)	Haemophilus influenzae	MSC06647	HI	Gram-	Systemic	Bacillus sbtilis	MD	N/A	None	None	0	t	0.424	0	0.046	0.047	HID-0.1%-	0.00843435	0.0544116	-0.147	-0.15	0	0.001
1104	CuOHIN/AAmpicillin	1.49823	43.8287	1.49918	0.817311	1	0.817452	CHEMBL174	CuO	HI	N/A	Ampicillin	MIC ug.mL-1	-1	50	MIC (uM)	Haemophilus influenzae	MSC06663	HI	Gram-	Systemic	Bacillus sbtilis	MD	N/A	None	None	0	t	0.424	0	0.046	0.047	HID-0.1%-	0.00843435	0.0544116	-0.147	-0.15	0	0.001
1105	CuOHIN/AAmpicillin	1.65505	43.9855	1.65599	0.839572	1	0.839699	CHEMBL174	CuO	HI	N/A	Ampicillin	MIC90 ug.mL-1	-1	34.891	MIC (uM)	Haemophilus influenzae	n.d	HI	Gram-	Systemic	Bacillus sbtilis	MD	N/A	None	None	0	t	0.452	0	0.046	0.047	HID-0.1%-	0.00843435	0.0544116	-0.147	-0.15	0	0.001
1106	CuOHIN/AAmpicillin	1.65505	43.9855	1.65599	0.839572	1	0.839699	CHEMBL174	CuO	HI	N/A	Ampicillin	MIC90 ug.mL-1	-1	34.891	MIC (uM)	Haemophilus influenzae	n.d	HI	Gram-	Systemic	Bacillus sbtilis	MD	N/A	None	None	0	v	0.452	0	0.046	0.047	HID-0.1%-	0.00843435	0.0544116	-0.147	-0.15	0	0.001
1107	CuOHIN/AAmpicillin	1.65505	43.9855	1.65599	0.839572	1	0.839699	CHEMBL174	CuO	HI	N/A	Ampicillin	MIC90 ug.mL-1	-1	34.891	MIC (uM)	Haemophilus influenzae	n.d	HI	Gram-	Systemic	Bacillus sbtilis	MD	N/A	None	None	0	t	0.452	0	0.046	0.047	HID-0.1%-	0.00843435	0.0544116	-0.147	-0.15	0	0.001
1108	CuOHIN/AAmpicillin	1.85666	44.1871	1.8576	0.864907	1	0.865017	CHEMBL174	CuO	HI	N/A	Ampicillin	MIC50 ug.mL-1	-1	21.529	MIC (uM)	Haemophilus influenzae	n.d	HI	Gram-	Systemic	Bacillus sbtilis	MD	N/A	None	None	0	t	0.488	0	0.046	0.047	HID-0.1%-	0.00843435	0.0544116	-0.147	-0.15	0	0.001
1109	CuOHIN/AAmpicillin	1.85666	44.1871	1.8576	0.864907	1	0.865017	CHEMBL174	CuO	HI	N/A	Ampicillin	MIC50 ug.mL-1	-1	21.529	MIC (uM)	Haemophilus influenzae	n.d	HI	Gram-	Systemic	Bacillus sbtilis	MD	N/A	None	None	0	v	0.488	0	0.046	0.047	HID-0.1%-	0.00843435	0.0544116	-0.147	-0.15	0	0.001
1110	CuOHIN/AAmpicillin	1.49823	43.8287	1.49918	0.817311	1	0.817452	CHEMBL174	CuO	HI	N/A	Ampicillin	MIC ug.mL-1	-1	50	MIC (uM)	Haemophilus influenzae	n.d	HI	Gram-	Systemic	Bacillus sbtilis	MD	N/A	None	None	0	t	0.424	0	0.046	0.047	HID-0.1%-	0.00843435	0.0544116	-0.147	-0.15	0	0.001
1111	CuOHIN/AAmpicillin	1.49823	43.8287	1.49918	0.817311	1	0.817452	CHEMBL174	CuO	HI	N/A	Ampicillin	MIC ug.mL-1	-1	50	MIC (uM)	Haemophilus influenzae	n.d	HI	Gram-	Systemic	Bacillus sbtilis	MD	N/A	None	None	0	t	0.424	0	0.046	0.047	HID-0.1%-	0.00843435	0.0544116	-0.147	-0.15	0	0.001
1112	CuOHIN/AAmpicillin	1.49823	43.8287	1.49918	0.817311	1	0.817452	CHEMBL174	CuO	HI	N/A	Ampicillin	MIC ug.mL-1	-1	50	MIC (uM)	Haemophilus influenzae	n.d	HI	Gram-	Systemic	Bacillus sbtilis	MD	N/A	None	None	0	t	0.424	0	0.046	0.047	HID-0.1%-	0.00843435	0.0544116	-0.147	-0.15	0	0.001
1113	CuOHIN/AAmpicillin	1.49823	43.8287	1.49918	0.817311	1	0.817452	CHEMBL174	CuO	HI	N/A	Ampicillin	MIC ug.mL-1	-1	50	MIC (uM)	Haemophilus influenzae	n.d	HI	Gram-	Systemic	Bacillus sbtilis	MD	N/A	None	None	0	v	0.424	0	0.046	0.047	HID-0.1%-	0.00843435	0.0544116	-0.147	-0.15	0	0.001
1114	CuOHIN/AAmpicillin	1.49823	43.8287	1.49918	0.817311	1	0.817452	CHEMBL174	CuO	HI	N/A	Ampicillin	MIC ug.mL-1	-1	50	MIC (uM)	Haemophilus influenzae	n.d	HI	Gram-	Systemic	Bacillus sbtilis	MD	N/A	None	None	0	t	0.424	0	0.046	0.047	HID-0.1%-	0.00843435	0.0544116	-0.147	-0.15	0	0.001
1115	CuOHIN/AAmpicillin	0.193339	42.5238	0.194281	0.548185	1	0.548418	CHEMBL174	CuO	HI	N/A	Ampicillin	Activity %	1	70	MIC (uM)	Haemophilus influenzae	n.d	HI	Gram-	Systemic	Bacillus sbtilis	MD	N/A	None	None	0	t	0.191	0	0.046	0.047	HID-0.1%-	0.00843435	0.0544116	-0.147	-0.15	0	0.001
1116	CuOHIN/AAmpicillin	0.193339	42.5238	0.194281	0.548185	1	0.548418	CHEMBL174	CuO	HI	N/A	Ampicillin	Activity %	1	70	MIC (uM)	Haemophilus influenzae	n.d	HI	Gram-	Systemic	Bacillus sbtilis	MD	N/A	None	None	0	t	0.191	0	0.046	0.047	HID-0.1%-	0.00843435	0.0544116	-0.147	-0.15	0	0.001
1117	CuIHPN/AAmpicillin	4.13982	77.874	-1.19699	0.984324	1	0.23201	CHEMBL174	CuI	HP	N/A	Ampicillin	MIC ug.mL-1	-1	50	MIC (uM)	Helicobacter pylori	n.d	HP	Gram-	GIT	Bacillus subtilis	ATCC6633	N/A	None	None	0	t	0.424	0	0.077	0.079	HPD-0.1%-	0.0068278	0.0836499	-0.143	-0.15	-0.001	-0.001
1118	ZnOMBN/AAmpicillin	2.38913	76.5105	-2.22709	0.915995	1	0.097344	CHEMBL174	ZnO	MB	N/A	Ampicillin	MIC ug.mL-1	-1	50	MBC (uM)	Mycobacterium bovis BCG	ML1013	MB	Gram	Respiratory	Bacillus sbtilis	MD	N/A	None	None	0	t	0.324	0	0.077	0.078	MBD-0.1%-	0.00712365	0.0840104	-0.147	-0.15	0	0
1119	ZnOMBN/AAmpicillin	2.38913	76.5105	-2.22709	0.915995	1	0.097344	CHEMBL174	ZnO	MB	N/A	Ampicillin	MIC ug.mL-1	-1	50	MBC (uM)	Mycobacterium bovis BCG	ML1047	MB	Gram	Respiratory	Bacillus sbtilis	MD	N/A	None	None	0	t	0.324	0	0.077	0.078	MBD-0.1%-	0.00712365	0.0840104	-0.147	-0.15	0	0
1120	ZnOMBN/AAmpicillin	0.815414	74.9368	-3.80081	0.693262	1	0.021864	CHEMBL174	ZnO	MB	N/A	Ampicillin	Ratio -	1	25.087	MBC (uM)	Mycobacterium bovis BCG	n.d	MB	Gram	Respiratory	Bacillus sbtilis	MD	N/A	None	None	0	v	0.043	0	0.077	0.078	MBD-0.1%-	0.00712365	0.0840104	-0.147	-0.15	0	0
1121	CuOMBN/AAmpicillin	2.38913	76.5105	-2.22709	0.915995	1	0.097344	CHEMBL174	CuO	MB	N/A	Ampicillin	MIC ug.mL-1	-1	50	MBC (uM)	Mycobacterium bovis BCG	ML1025	MB	Gram	Respiratory	Bacillus sbtilis	MD	N/A	None	None	0	t	0.324	0	0.077	0.078	MBD-0.1%-	0.00712365	0.0840104	-0.147	-0.15	0	0
1122	CuOMBN/AAmpicillin	2.38913	76.5105	-2.22709	0.915995	1	0.097344	CHEMBL174	CuO	MB	N/A	Ampicillin	MIC ug.mL-1	-1	50	MBC (uM)	Mycobacterium bovis BCG	ML1048	MB	Gram	Respiratory	Bacillus sbtilis	MD	N/A	None	None	0	t	0.324	0	0.077	0.078	MBD-0.1%-	0.00712365	0.0840104	-0.147	-0.15	0	0
1123	Fe2O3MBN/AAmpicillin	2.38913	76.5105	-2.22709	0.915995	1	0.097344	CHEMBL174	Fe2O3	MB	N/A	Ampicillin	MIC ug.mL-1	-1	50	MBC (uM)	Mycobacterium bovis BCG	ML1029	MB	Gram	Respiratory	Bacillus sbtilis	MD	N/A	None	None	0	t	0.324	0	0.077	0.078	MBD-0.1%-	0.00712365	0.0840104	-0.147	-0.15	0	0
1124	Fe2O3MBN/AAmpicillin	2.38913	76.5105	-2.22709	0.915995	1	0.097344	CHEMBL174	Fe2O3	MB	N/A	Ampicillin	MIC ug.mL-1	-1	50	MBC (uM)	Mycobacterium bovis BCG	ML1050	MB	Gram	Respiratory	Bacillus sbtilis	MD	N/A	None	None	0	v	0.324	0	0.077	0.078	MBD-0.1%-	0.00712365	0.0840104	-0.147	-0.15	0	0
1125	AgMBN/AAmpicillin	3.14068	77.2621	-1.47554	0.95854	1	0.186102	CHEMBL174	Ag	MB	N/A	Ampicillin	MIC ug.mL-1	-1	50	MBC (uM)	Mycobacterium bovis BCG	ML1038	MB	Gram	Respiratory	Bacillus subtilis	ATCC6633	Spherical	None	None	0	t	0.324	0	0.077	0.078	MBD-0.1%-	0.00712365	0.0840104	-0.147	-0.135	-0.001	0
1126	AgMBN/AAmpicillin	3.14068	77.2621	-1.47554	0.95854	1	0.186102	CHEMBL174	Ag	MB	N/A	Ampicillin	MIC ug.mL-1	-1	50	MBC (uM)	Mycobacterium bovis BCG	ML1065	MB	Gram	Respiratory	Bacillus subtilis	ATCC6633	Spherical	None	None	0	t	0.324	0	0.077	0.078	MBD-0.1%-	0.00712365	0.0840104	-0.147	-0.135	-0.001	0
1127	CuOMBN/AAmpicillin	2.38913	76.5105	-2.22709	0.915995	1	0.097344	CHEMBL174	CuO	MB	N/A	Ampicillin	MIC ug.mL-1	-1	50	MBC (uM)	Mycobacterium bovis BCG	ML1030	MB	Gram	Respiratory	Bacillus sbtilis	MD	N/A	None	None	0	t	0.324	0	0.077	0.078	MBD-0.1%-	0.00712365	0.0840104	-0.147	-0.15	0	0
1128	CuOMBN/AAmpicillin	2.38913	76.5105	-2.22709	0.915995	1	0.097344	CHEMBL174	CuO	MB	N/A	Ampicillin	MIC ug.mL-1	-1	50	MBC (uM)	Mycobacterium bovis BCG	ML1051	MB	Gram	Respiratory	Bacillus sbtilis	MD	N/A	None	None	0	v	0.324	0	0.077	0.078	MBD-0.1%-	0.00712365	0.0840104	-0.147	-0.15	0	0
1129	CuMBN/AAmpicillin	1.16323	75.2846	-3.45299	0.76192	1	0.0306799	CHEMBL174	Cu	MB	N/A	Ampicillin	MIC ug.mL-1	-1	50	MBC (uM)	Mycobacterium bovis BCG	ML1006	MB	Gram	Respiratory	Bacillus subtilis	ATCC6633	Spherical	None	None	0	t	0.324	0	0.077	0.078	MBD-0.1%-	0.00712365	0.0840104	-0.147	-0.15	-0.001	0
1130	CuMBN/AAmpicillin	1.16323	75.2846	-3.45299	0.76192	1	0.0306799	CHEMBL174	Cu	MB	N/A	Ampicillin	MIC ug.mL-1	-1	50	MBC (uM)	Mycobacterium bovis BCG	ML1040	MB	Gram	Respiratory	Bacillus subtilis	ATCC6633	Spherical	None	None	0	t	0.324	0	0.077	0.078	MBD-0.1%-	0.00712365	0.0840104	-0.147	-0.15	-0.001	0
1131	CuMBN/AAmpicillin	1.16323	75.2846	-3.45299	0.76192	1	0.0306799	CHEMBL174	Cu	MB	N/A	Ampicillin	MIC ug.mL-1	-1	50	MBC (uM)	Mycobacterium bovis BCG	ML1069	MB	Gram	Respiratory	Bacillus subtilis	ATCC6633	Spherical	None	None	0	t	0.324	0	0.077	0.078	MBD-0.1%-	0.00712365	0.0840104	-0.147	-0.15	-0.001	0
1132	CuOMBN/AAmpicillin	2.38913	76.5105	-2.22709	0.915995	1	0.097344	CHEMBL174	CuO	MB	N/A	Ampicillin	MIC ug.mL-1	-1	50	MBC (uM)	Mycobacterium bovis BCG	ML1052	MB	Gram	Respiratory	Bacillus sbtilis	MD	N/A	None	None	0	v	0.324	0	0.077	0.078	MBD-0.1%-	0.00712365	0.0840104	-0.147	-0.15	0	0
1133	CuIMBN/AAmpicillin	3.27238	77.3938	-1.34384	0.963469	1	0.206879	CHEMBL174	CuI	MB	N/A	Ampicillin	MIC ug.mL-1	-1	50	MBC (uM)	Mycobacterium bovis BCG	ML1007	MB	Gram	Respiratory	Bacillus subtilis	ATCC6633	N/A	None	None	0	t	0.324	0	0.077	0.078	MBD-0.1%-	0.00712365	0.0840104	-0.143	-0.15	-0.001	0
1134	CuIMBN/AAmpicillin	3.27238	77.3938	-1.34384	0.963469	1	0.206879	CHEMBL174	CuI	MB	N/A	Ampicillin	MIC ug.mL-1	-1	50	MBC (uM)	Mycobacterium bovis BCG	ML1041	MB	Gram	Respiratory	Bacillus subtilis	ATCC6633	N/A	None	None	0	t	0.324	0	0.077	0.078	MBD-0.1%-	0.00712365	0.0840104	-0.143	-0.15	-0.001	0
1135	CuIMBN/AAmpicillin	3.27238	77.3938	-1.34384	0.963469	1	0.206879	CHEMBL174	CuI	MB	N/A	Ampicillin	MIC ug.mL-1	-1	50	MBC (uM)	Mycobacterium bovis BCG	ML1075	MB	Gram	Respiratory	Bacillus subtilis	ATCC6633	N/A	None	None	0	t	0.324	0	0.077	0.078	MBD-0.1%-	0.00712365	0.0840104	-0.143	-0.15	-0.001	0
1136	CuOMBN/AAmpicillin	2.38913	76.5105	-2.22709	0.915995	1	0.097344	CHEMBL174	CuO	MB	N/A	Ampicillin	MIC ug.mL-1	-1	50	MBC (uM)	Mycobacterium bovis BCG	ML1053	MB	Gram	Respiratory	Bacillus sbtilis	MD	N/A	None	None	0	v	0.324	0	0.077	0.078	MBD-0.1%-	0.00712365	0.0840104	-0.147	-0.15	0	0
1137	CuOMBN/AAmpicillin	2.46705	76.5885	-2.14917	0.921799	1	0.104409	CHEMBL174	CuO	MB	N/A	Ampicillin	MIC ug.mL-1	-1	50	MBC (uM)	Mycobacterium bovis BCG	ML1034	MB	Gram	Respiratory	Bacillus sbtilis	MD	N/A	None	None	0	t	0.324	0	0.077	0.078	MBD-0.1%-	0.00712365	0.0840104	-0.147	-0.15	0	0.003
1138	CuOMBN/AAmpicillin	2.38913	76.5105	-2.22709	0.915995	1	0.097344	CHEMBL174	CuO	MB	N/A	Ampicillin	MIC ug.mL-1	-1	50	MBC (uM)	Mycobacterium bovis BCG	ML1058	MB	Gram	Respiratory	Bacillus sbtilis	MD	N/A	None	None	0	t	0.324	0	0.077	0.078	MBD-0.1%-	0.00712365	0.0840104	-0.147	-0.15	0	0
1139	CuMBN/AAmpicillin	1.72327	75.8447	-2.89294	0.84855	1	0.0525034	CHEMBL174	Cu	MB	N/A	Ampicillin	MIC ug.mL-1	-1	50	MIC (uM)	Mycobacterium bovis BCG	ML1009	MB	Gram	Respiratory	Bacillus subtilis	ATCC6633	Spherical	None	None	0	t	0.424	0	0.077	0.078	MBD-0.1%-	0.00712365	0.0840104	-0.147	-0.15	-0.001	0
1140	CuMBN/AAmpicillin	1.72327	75.8447	-2.89294	0.84855	1	0.0525034	CHEMBL174	Cu	MB	N/A	Ampicillin	MIC ug.mL-1	-1	50	MIC (uM)	Mycobacterium bovis BCG	ML1042	MB	Gram	Respiratory	Bacillus subtilis	ATCC6633	Spherical	None	None	0	v	0.424	0	0.077	0.078	MBD-0.1%-	0.00712365	0.0840104	-0.147	-0.15	-0.001	0
1141	AgMBN/AAmpicillin	3.70072	77.8221	-0.915502	0.97589	1	0.285875	CHEMBL174	Ag	MB	N/A	Ampicillin	MIC ug.mL-1	-1	50	MIC (uM)	Mycobacterium bovis BCG	ML1010	MB	Gram	Respiratory	Bacillus subtilis	ATCC6633	Spherical	None	None	0	t	0.424	0	0.077	0.078	MBD-0.1%-	0.00712365	0.0840104	-0.147	-0.135	-0.001	0
1142	AgMBN/AAmpicillin	3.70072	77.8221	-0.915502	0.97589	1	0.285875	CHEMBL174	Ag	MB	N/A	Ampicillin	MIC ug.mL-1	-1	50	MIC (uM)	Mycobacterium bovis BCG	ML1044	MB	Gram	Respiratory	Bacillus subtilis	ATCC6633	Spherical	None	None	0	t	0.424	0	0.077	0.078	MBD-0.1%-	0.00712365	0.0840104	-0.147	-0.135	-0.001	0
1143	CuOMBN/AAmpicillin	3.02709	77.1485	-1.58913	0.953783	1	0.169506	CHEMBL174	CuO	MB	N/A	Ampicillin	MIC ug.mL-1	-1	50	MIC (uM)	Mycobacterium bovis BCG	ML1034	MB	Gram	Respiratory	Bacillus sbtilis	MD	N/A	None	None	0	t	0.424	0	0.077	0.078	MBD-0.1%-	0.00712365	0.0840104	-0.147	-0.15	0	0.003
1144	CuOMBN/AAmpicillin	2.94917	77.0706	-1.66705	0.950224	1	0.158818	CHEMBL174	CuO	MB	N/A	Ampicillin	MIC ug.mL-1	-1	50	MIC (uM)	Mycobacterium bovis BCG	ML1060	MB	Gram	Respiratory	Bacillus sbtilis	MD	N/A	None	None	0	v	0.424	0	0.077	0.078	MBD-0.1%-	0.00712365	0.0840104	-0.147	-0.15	0	0
1145	CuOMBN/AAmpicillin	2.94917	77.0706	-1.66705	0.950224	1	0.158818	CHEMBL174	CuO	MB	N/A	Ampicillin	MIC ug.mL-1	-1	50	MIC (uM)	Mycobacterium bovis BCG	ML1061	MB	Gram	Respiratory	Bacillus sbtilis	MD	N/A	None	None	0	t	0.424	0	0.077	0.078	MBD-0.1%-	0.00712365	0.0840104	-0.147	-0.15	0	0
1146	CuOMBN/AAmpicillin	2.94917	77.0706	-1.66705	0.950224	1	0.158818	CHEMBL174	CuO	MB	N/A	Ampicillin	MIC ug.mL-1	-1	50	MIC (uM)	Mycobacterium bovis BCG	n.d	MB	Gram	Respiratory	Bacillus sbtilis	MD	N/A	None	None	0	t	0.424	0	0.077	0.078	MBD-0.1%-	0.00712365	0.0840104	-0.147	-0.15	0	0
1147	CuIMBN/AAmpicillin	3.83242	77.9538	-0.783801	0.978802	1	0.313501	CHEMBL174	CuI	MB	N/A	Ampicillin	MIC ug.mL-1	-1	50	MIC (uM)	Mycobacterium bovis BCG	ML1012	MB	Gram	Respiratory	Bacillus subtilis	ATCC6633	N/A	None	None	0	t	0.424	0	0.077	0.078	MBD-0.1%-	0.00712365	0.0840104	-0.143	-0.15	-0.001	0
1148	CuIMBN/AAmpicillin	3.83242	77.9538	-0.783801	0.978802	1	0.313501	CHEMBL174	CuI	MB	N/A	Ampicillin	MIC ug.mL-1	-1	50	MIC (uM)	Mycobacterium bovis BCG	ML1046	MB	Gram	Respiratory	Bacillus subtilis	ATCC6633	N/A	None	None	0	v	0.424	0	0.077	0.078	MBD-0.1%-	0.00712365	0.0840104	-0.143	-0.15	-0.001	0
1149	CuOMBN/AAmpicillin	2.94917	77.0706	-1.66705	0.950224	1	0.158818	CHEMBL174	CuO	MB	N/A	Ampicillin	MIC ug.mL-1	-1	50	MIC (uM)	Mycobacterium bovis BCG	ML1036	MB	Gram	Respiratory	Bacillus sbtilis	MD	N/A	None	None	0	t	0.424	0	0.077	0.078	MBD-0.1%-	0.00712365	0.0840104	-0.147	-0.15	0	0
1150	CuOMBN/AAmpicillin	2.94917	77.0706	-1.66705	0.950224	1	0.158818	CHEMBL174	CuO	MB	N/A	Ampicillin	MIC ug.mL-1	-1	50	MIC (uM)	Mycobacterium bovis BCG	ML1062	MB	Gram	Respiratory	Bacillus sbtilis	MD	N/A	None	None	0	t	0.424	0	0.077	0.078	MBD-0.1%-	0.00712365	0.0840104	-0.147	-0.15	0	0
1151	CuOMBN/AAmpicillin	2.94917	77.0706	-1.66705	0.950224	1	0.158818	CHEMBL174	CuO	MB	N/A	Ampicillin	MIC ug.mL-1	-1	50	MIC (uM)	Mycobacterium bovis BCG	ML1037	MB	Gram	Respiratory	Bacillus sbtilis	MD	N/A	None	None	0	t	0.424	0	0.077	0.078	MBD-0.1%-	0.00712365	0.0840104	-0.147	-0.15	0	0
1152	CuOMBN/AAmpicillin	2.94917	77.0706	-1.66705	0.950224	1	0.158818	CHEMBL174	CuO	MB	N/A	Ampicillin	MIC ug.mL-1	-1	50	MIC (uM)	Mycobacterium bovis BCG	ML1064	MB	Gram	Respiratory	Bacillus sbtilis	MD	N/A	None	None	0	v	0.424	0	0.077	0.078	MBD-0.1%-	0.00712365	0.0840104	-0.147	-0.15	0	0
1153	AgNGN/AAmpicillin	2.93099	69.7592	-0.855109	0.949357	1	0.298362	CHEMBL174	Ag	NG	N/A	Ampicillin	MIC ug.mL-1	-1	50	MBC (uM)	Neisseria gonorrhoeae	n.d	NG	Gram-	Systemic	Bacillus subtilis	ATCC6633	Spherical	None	None	0	t	0.324	0	0.07	0.072	NGD-0.1%-	0.00733279	0.0772201	-0.147	-0.135	-0.001	0.001
1154	CuINGN/AAmpicillin	3.42112	70.2493	-0.364982	0.968358	1	0.409754	CHEMBL174	CuI	NG	N/A	Ampicillin	IZ mm	1	5	MBC (uM)	Neisseria gonorrhoeae	n.d	NG	Gram-	Systemic	Bacillus subtilis	ATCC6633	N/A	None	None	0	t	0.388	0	0.07	0.072	NGD-0.1%-	0.00733279	0.0772201	-0.143	-0.15	-0.001	0.001
1155	CuONGN/AAmpicillin	2.73948	69.5677	-1.04662	0.939317	1	0.259875	CHEMBL174	CuO	NG	N/A	Ampicillin	MIC ug.mL-1	-1	50	MIC (uM)	Neisseria gonorrhoeae	n.d	NG	Gram-	Systemic	Bacillus sbtilis	MD	N/A	None	None	0	t	0.424	0	0.07	0.072	NGD-0.1%-	0.00733279	0.0772201	-0.147	-0.15	0	0.001
1156	AgNMN/AAmpicillin	3.45713	75.2342	-1.42263	0.969443	1	0.19425	CHEMBL174	Ag	NM	N/A	Ampicillin	MIC90 ug.mL-1	-1	34.891	MBC (uM)	Neisseria meningitidis	n.d	NM	Gram-	Systemic	Bacillus subtilis	ATCC6633	Spherical	None	None	0	v	0.345	0	0.075	0.077	NMD-0.1%-	0.00697024	0.0818278	-0.147	-0.135	-0.001	0.001
1157	AgNMN/AAmpicillin	2.34265	74.1198	-2.53711	0.912348	1	0.0732972	CHEMBL174	Ag	NM	N/A	Ampicillin	Activity %	1	70	MBC (uM)	Neisseria meningitidis	n.d	NM	Gram-	Systemic	Bacillus subtilis	ATCC6633	Spherical	None	None	0	t	0.146	0	0.075	0.077	NMD-0.1%-	0.00697024	0.0818278	-0.147	-0.135	-0.001	0.001
1158	CuNMN/AAmpicillin	0.365202	72.1423	-4.51455	0.590299	1	0.0108299	CHEMBL174	Cu	NM	N/A	Ampicillin	Activity %	1	70	MBC (uM)	Neisseria meningitidis	n.d	NM	Gram-	Systemic	Bacillus subtilis	ATCC6633	Spherical	None	None	0	t	0.146	0	0.075	0.077	NMD-0.1%-	0.00697024	0.0818278	-0.147	-0.15	-0.001	0.001
1159	CuINMN/AAmpicillin	2.47435	74.2515	-2.40541	0.922324	1	0.0827611	CHEMBL174	CuI	NM	N/A	Ampicillin	Activity %	1	70	MBC (uM)	Neisseria meningitidis	n.d	NM	Gram-	Systemic	Bacillus subtilis	ATCC6633	N/A	None	None	0	t	0.146	0	0.075	0.077	NMD-0.1%-	0.00697024	0.0818278	-0.143	-0.15	-0.001	0.001
1160	CuONMN/AAmpicillin	3.14801	74.9251	-1.73174	0.95883	1	0.150365	CHEMBL174	CuO	NM	N/A	Ampicillin	MIC ug.mL-1	-1	50	MIC (uM)	Neisseria meningitidis	n.d	NM	Gram-	Systemic	Bacillus sbtilis	MD	N/A	None	None	0	v	0.424	0	0.075	0.077	NMD-0.1%-	0.00697024	0.0818278	-0.147	-0.15	0	0.001
1161	CuINMN/AAmpicillin	4.38969	76.1668	-0.49007	0.987747	1	0.379877	CHEMBL174	CuI	NM	N/A	Ampicillin	MIC50 ug.mL-1	-1	21.529	MIC (uM)	Neisseria meningitidis	n.d	NM	Gram-	Systemic	Bacillus subtilis	ATCC6633	N/A	None	None	0	t	0.488	0	0.075	0.077	NMD-0.1%-	0.00697024	0.0818278	-0.143	-0.15	-0.001	0.001
1162	CuONMN/AAmpicillin	3.14801	74.9251	-1.73174	0.95883	1	0.150365	CHEMBL174	CuO	NM	N/A	Ampicillin	MIC ug.mL-1	-1	50	MIC (uM)	Neisseria meningitidis	n.d	NM	Gram-	Systemic	Bacillus sbtilis	MD	N/A	None	None	0	t	0.424	0	0.075	0.077	NMD-0.1%-	0.00697024	0.0818278	-0.147	-0.15	0	0.001
1163	AuPGPDT/AChAmpicillin	8.92705	81.6501	3.76368	0.999867	1	0.977328	CHEMBL174	Au	PG	PDT/ACh	Ampicillin	MIC ug.mL-1	-1	50	MBC (uM)	Porphyromonas gingivalis	n.d	PG	Gram-	Systemic	Escherichia coli	ATCC11775	Spherical	Double	Monomer	0	t	0.324	0	0.076	0.078	PGD-0.1%-	0.00687904	0.0827085	-0.143	-0.109	-0.001	-0.001
1164	CuOSCN/AAmpicillin	1.65353	35.4679	2.20538	0.839367	1	0.900732	CHEMBL174	CuO	SC	N/A	Ampicillin	MIC ug.mL-1	-1	50	MIC (uM)	Saccharomyces cerevisiae	n.d	SC	Gram-	NO	Bacillus sbtilis	MD	N/A	None	None	0	v	0.424	0	0.038	0.04	SCD-0.1%-	0.00848093	0.0464827	-0.147	-0.15	0	0.009
1165	CuOSCN/AAmpicillin	2.11836	35.9327	2.67021	0.892675	1	0.935246	CHEMBL174	CuO	SC	N/A	Ampicillin	IZ mm	1	5	MIC (uM)	Saccharomyces cerevisiae	n.d	SC	Gram-	NO	Bacillus sbtilis	MD	N/A	None	None	0	t	0.507	0	0.038	0.04	SCD-0.1%-	0.00848093	0.0464827	-0.147	-0.15	0	0.009
1166	ZnOTYN/AAmpicillin	3.60822	8.44337	0.935183	0.973615	0.999785	0.718126	CHEMBL174	ZnO	TY	N/A	Ampicillin	IZ mm	1	5	MBC (uM)	Salmonella enterica subsp. enterica serovar Typhi	n.d	TY	Gram	Systemic	Bacillus sbtilis	MD	N/A	None	None	0	v	0.388	0	0.013	0.014	TYD-0.1%-	0.0063368	0.0195017	-0.147	-0.15	0	-0.001
1167	CuOTYN/AAmpicillin	3.37966	8.21481	0.706624	0.967063	0.999729	0.669655	CHEMBL174	CuO	TY	N/A	Ampicillin	MIC ug.mL-1	-1	50	MBC (uM)	Salmonella enterica subsp. enterica serovar Typhi	MTCC 98	TY	Gram	Systemic	Bacillus sbtilis	MD	N/A	None	None	0	t	0.324	0	0.013	0.014	TYD-0.1%-	0.0063368	0.0195017	-0.147	-0.15	0	0.004
1168	CuOTYN/AAmpicillin	3.10418	7.93933	0.431146	0.957065	0.999644	0.606147	CHEMBL174	CuO	TY	N/A	Ampicillin	MIC ug	-1	30.003	MBC (uM)	Salmonella enterica subsp. enterica serovar Typhi	n.d	TY	Gram	Systemic	Bacillus sbtilis	MD	N/A	None	None	0	t	0.298	0	0.013	0.014	TYD-0.1%-	0.0063368	0.0195017	-0.147	-0.15	0	-0.001
1169	CuOTYN/AAmpicillin	3.60822	8.44337	0.935183	0.973615	0.999785	0.718126	CHEMBL174	CuO	TY	N/A	Ampicillin	IZ mm	1	5	MBC (uM)	Salmonella enterica subsp. enterica serovar Typhi	n.d	TY	Gram	Systemic	Bacillus sbtilis	MD	N/A	None	None	0	v	0.388	0	0.013	0.014	TYD-0.1%-	0.0063368	0.0195017	-0.147	-0.15	0	-0.001
1170	Fe2O3TYN/AAmpicillin	3.03804	7.87319	0.364999	0.954263	0.999619	0.59025	CHEMBL174	Fe2O3	TY	N/A	Ampicillin	MIC99 ug ml-1	-1	161.696	MBC (uM)	Salmonella enterica subsp. enterica serovar Typhi	MTCC 98	TY	Gram	Systemic	Bacillus sbtilis	MD	N/A	None	None	0	t	0.263	0	0.013	0.014	TYD-0.1%-	0.0063368	0.0195017	-0.147	-0.15	0	0.004
1171	Fe2O3TYN/AAmpicillin	3.37966	8.21481	0.706624	0.967063	0.999729	0.669655	CHEMBL174	Fe2O3	TY	N/A	Ampicillin	MIC ug.mL-1	-1	50	MBC (uM)	Salmonella enterica subsp. enterica serovar Typhi	MTCC 98	TY	Gram	Systemic	Bacillus sbtilis	MD	N/A	None	None	0	t	0.324	0	0.013	0.014	TYD-0.1%-	0.0063368	0.0195017	-0.147	-0.15	0	0.004
1172	Fe2O3TYN/AAmpicillin	3.10418	7.93933	0.431146	0.957065	0.999644	0.606147	CHEMBL174	Fe2O3	TY	N/A	Ampicillin	MIC ug	-1	30.003	MBC (uM)	Salmonella enterica subsp. enterica serovar Typhi	n.d	TY	Gram	Systemic	Bacillus sbtilis	MD	N/A	None	None	0	t	0.298	0	0.013	0.014	TYD-0.1%-	0.0063368	0.0195017	-0.147	-0.15	0	-0.001
1173	AgTYN/AAmpicillin	4.13121	8.96636	1.45817	0.984191	0.999872	0.811253	CHEMBL174	Ag	TY	N/A	Ampicillin	MIC ug.mL-1	-1	50	MBC (uM)	Salmonella enterica subsp. enterica serovar Typhi	MTCC 98	TY	Gram	Systemic	Bacillus subtilis	ATCC6633	Spherical	None	None	0	t	0.324	0	0.013	0.014	TYD-0.1%-	0.0063368	0.0195017	-0.147	-0.135	-0.001	0.004
1174	AgTYN/AAmpicillin	4.00134	8.83649	1.3283	0.982037	0.999855	0.79056	CHEMBL174	Ag	TY	N/A	Ampicillin	MIC ug.mL-1	-1	50	MBC (uM)	Salmonella enterica subsp. enterica serovar Typhi	n.d	TY	Gram	Systemic	Bacillus subtilis	ATCC6633	Spherical	None	None	0	v	0.324	0	0.013	0.014	TYD-0.1%-	0.0063368	0.0195017	-0.147	-0.135	-0.001	-0.001
1175	AgTYN/AAmpicillin	3.00447	7.83962	0.331432	0.952776	0.999606	0.582108	CHEMBL174	Ag	TY	N/A	Ampicillin	Activity %	1	70	MBC (uM)	Salmonella enterica subsp. enterica serovar Typhi	n.d	TY	Gram	Systemic	Bacillus subtilis	ATCC6633	Spherical	None	None	0	t	0.146	0	0.013	0.014	TYD-0.1%-	0.0063368	0.0195017	-0.147	-0.135	-0.001	-0.001
1176	CuOTYN/AAmpicillin	3.37966	8.21481	0.706624	0.967063	0.999729	0.669655	CHEMBL174	CuO	TY	N/A	Ampicillin	MIC ug.mL-1	-1	50	MBC (uM)	Salmonella enterica subsp. enterica serovar Typhi	MTCC 98	TY	Gram	Systemic	Bacillus sbtilis	MD	N/A	None	None	0	t	0.324	0	0.013	0.014	TYD-0.1%-	0.0063368	0.0195017	-0.147	-0.15	0	0.004
1177	CuTYN/AAmpicillin	2.15377	6.98892	-0.519271	0.89602	0.999079	0.373023	CHEMBL174	Cu	TY	N/A	Ampicillin	MIC ug.mL-1	-1	50	MBC (uM)	Salmonella enterica subsp. enterica serovar Typhi	MTCC 98	TY	Gram	Systemic	Bacillus subtilis	ATCC6633	Spherical	None	None	0	v	0.324	0	0.013	0.014	TYD-0.1%-	0.0063368	0.0195017	-0.147	-0.15	-0.001	0.004
1178	CuTYN/AAmpicillin	2.14151	6.97666	-0.53153	0.894873	0.999067	0.37016	CHEMBL174	Cu	TY	N/A	Ampicillin	MIC90 ug.mL-1	-1	34.891	MBC (uM)	Salmonella enterica subsp. enterica serovar Typhi	n.d	TY	Gram	Systemic	Bacillus subtilis	ATCC6633	Spherical	None	None	0	t	0.345	0	0.013	0.014	TYD-0.1%-	0.0063368	0.0195017	-0.147	-0.15	-0.001	-0.001
1179	CuTYN/AAmpicillin	2.0239	6.85905	-0.649139	0.883284	0.998951	0.343184	CHEMBL174	Cu	TY	N/A	Ampicillin	MIC ug.mL-1	-1	50	MBC (uM)	Salmonella enterica subsp. enterica serovar Typhi	n.d	TY	Gram	Systemic	Bacillus subtilis	ATCC6633	Spherical	None	None	0	t	0.324	0	0.013	0.014	TYD-0.1%-	0.0063368	0.0195017	-0.147	-0.15	-0.001	-0.001
1180	CuTYN/AAmpicillin	1.02703	5.86218	-1.64601	0.736339	0.997163	0.161649	CHEMBL174	Cu	TY	N/A	Ampicillin	Activity %	1	70	MBC (uM)	Salmonella enterica subsp. enterica serovar Typhi	n.d	TY	Gram	Systemic	Bacillus subtilis	ATCC6633	Spherical	None	None	0	t	0.146	0	0.013	0.014	TYD-0.1%-	0.0063368	0.0195017	-0.147	-0.15	-0.001	-0.001
1181	CuOTYN/AAmpicillin	3.03804	7.87319	0.364999	0.954263	0.999619	0.59025	CHEMBL174	CuO	TY	N/A	Ampicillin	MIC99 ug ml-1	-1	161.696	MBC (uM)	Salmonella enterica subsp. enterica serovar Typhi	MTCC 98	TY	Gram	Systemic	Bacillus sbtilis	MD	N/A	None	None	0	v	0.263	0	0.013	0.014	TYD-0.1%-	0.0063368	0.0195017	-0.147	-0.15	0	0.004
1182	CuOTYN/AAmpicillin	3.37966	8.21481	0.706624	0.967063	0.999729	0.669655	CHEMBL174	CuO	TY	N/A	Ampicillin	MIC ug.mL-1	-1	50	MBC (uM)	Salmonella enterica subsp. enterica serovar Typhi	MTCC 98	TY	Gram	Systemic	Bacillus sbtilis	MD	N/A	None	None	0	t	0.324	0	0.013	0.014	TYD-0.1%-	0.0063368	0.0195017	-0.147	-0.15	0	0.004
1183	CuITYN/AAmpicillin	4.13304	8.96819	1.46001	0.984219	0.999873	0.811533	CHEMBL174	CuI	TY	N/A	Ampicillin	MIC ug.mL-1	-1	50	MBC (uM)	Salmonella enterica subsp. enterica serovar Typhi	n.d	TY	Gram	Systemic	Bacillus subtilis	ATCC6633	N/A	None	None	0	v	0.324	0	0.013	0.014	TYD-0.1%-	0.0063368	0.0195017	-0.143	-0.15	-0.001	-0.001
1184	CuOTYN/AAmpicillin	3.37966	8.21481	0.706624	0.967063	0.999729	0.669655	CHEMBL174	CuO	TY	N/A	Ampicillin	MIC ug.mL-1	-1	50	MBC (uM)	Salmonella enterica subsp. enterica serovar Typhi	MTCC 98	TY	Gram	Systemic	Bacillus sbtilis	MD	N/A	None	None	0	t	0.324	0	0.013	0.014	TYD-0.1%-	0.0063368	0.0195017	-0.147	-0.15	0	0.004
1185	CuOTYN/AAmpicillin	3.52421	8.35936	0.851176	0.971369	0.999766	0.700814	CHEMBL174	CuO	TY	N/A	Ampicillin	MIC50 ug.mL-1	-1	21.529	MBC (uM)	Salmonella enterica subsp. enterica serovar Typhi	n.d	TY	Gram	Systemic	Bacillus sbtilis	MD	N/A	None	None	0	t	0.373	0	0.013	0.014	TYD-0.1%-	0.0063368	0.0195017	-0.147	-0.15	0	-0.001
1186	CuOTYN/AAmpicillin	3.27577	8.11092	0.60273	0.963588	0.9997	0.646281	CHEMBL174	CuO	TY	N/A	Ampicillin	MIC ug.mL-1	-1	50	MBC (uM)	Salmonella enterica subsp. enterica serovar Typhi	ATCC15499	TY	Gram	Systemic	Bacillus sbtilis	MD	N/A	None	None	0	v	0.324	0	0.013	0.014	TYD-0.1%-	0.0063368	0.0195017	-0.147	-0.15	0	0
1187	CuTYN/AAmpicillin	1.05503	5.89018	-1.61801	0.741739	0.997241	0.16548	CHEMBL174	Cu	TY	N/A	Ampicillin	MIC nM	-1	2500	MIC (uM)	Salmonella enterica subsp. enterica serovar Typhi	NCIM 2501	TY	Gram	Systemic	Bacillus subtilis	ATCC6633	Spherical	None	None	0	t	0.151	0	0.013	0.014	TYD-0.1%-	0.0063368	0.0195017	-0.147	-0.15	-0.001	-0.001
1188	AgTYN/AAmpicillin	4.69125	9.5264	2.01821	0.990908	0.999927	0.882696	CHEMBL174	Ag	TY	N/A	Ampicillin	MIC ug.mL-1	-1	50	MIC (uM)	Salmonella enterica subsp. enterica serovar Typhi	MTCC 98	TY	Gram	Systemic	Bacillus subtilis	ATCC6633	Spherical	None	None	0	t	0.424	0	0.013	0.014	TYD-0.1%-	0.0063368	0.0195017	-0.147	-0.135	-0.001	0.004
1189	CuOTYN/AAmpicillin	3.83581	8.67096	1.16277	0.978872	0.999829	0.761836	CHEMBL174	CuO	TY	N/A	Ampicillin	MIC ug.mL-1	-1	50	MIC (uM)	Salmonella enterica subsp. enterica serovar Typhi	MTCC 733	TY	Gram	Systemic	Bacillus sbtilis	MD	N/A	None	None	0	t	0.424	0	0.013	0.014	TYD-0.1%-	0.0063368	0.0195017	-0.147	-0.15	0	0
1190	CuOTYN/AAmpicillin	3.9397	8.77485	1.26666	0.980917	0.999845	0.780171	CHEMBL174	CuO	TY	N/A	Ampicillin	MIC ug.mL-1	-1	50	MIC (uM)	Salmonella enterica subsp. enterica serovar Typhi	MTCC 98	TY	Gram	Systemic	Bacillus sbtilis	MD	N/A	None	None	0	v	0.424	0	0.013	0.014	TYD-0.1%-	0.0063368	0.0195017	-0.147	-0.15	0	0.004
1191	CuOTYN/AAmpicillin	1.43526	6.27041	-1.23778	0.80772	0.998112	0.224823	CHEMBL174	CuO	TY	N/A	Ampicillin	IZ nm	1	100	MIC (uM)	Salmonella enterica subsp. enterica serovar Typhi	n.d	TY	Gram	Systemic	Bacillus sbtilis	MD	N/A	None	None	0	t	0	0	0.013	0.014	TYD-0.1%-	0.0063368	0.0195017	-0.147	-0.15	0	-0.001
1192	CuOTYN/AAmpicillin	1.43526	6.27041	-1.23778	0.80772	0.998112	0.224823	CHEMBL174	CuO	TY	N/A	Ampicillin	IZ nm	1	100	MIC (uM)	Salmonella enterica subsp. enterica serovar Typhi	n.d	TY	Gram	Systemic	Bacillus sbtilis	MD	N/A	None	None	0	v	0	0	0.013	0.014	TYD-0.1%-	0.0063368	0.0195017	-0.147	-0.15	0	-0.001
1193	CuOTYN/AAmpicillin	3.9397	8.77485	1.26666	0.980917	0.999845	0.780171	CHEMBL174	CuO	TY	N/A	Ampicillin	MIC ug.mL-1	-1	50	MIC (uM)	Salmonella enterica subsp. enterica serovar Typhi	MTCC 98	TY	Gram	Systemic	Bacillus sbtilis	MD	N/A	None	None	0	v	0.424	0	0.013	0.014	TYD-0.1%-	0.0063368	0.0195017	-0.147	-0.15	0	0.004
1194	CuOTYN/AAmpicillin	3.80983	8.64498	1.1368	0.978328	0.999824	0.757091	CHEMBL174	CuO	TY	N/A	Ampicillin	MIC ug.mL-1	-1	50	MIC (uM)	Salmonella enterica subsp. enterica serovar Typhi	n.d	TY	Gram	Systemic	Bacillus sbtilis	MD	N/A	None	None	0	t	0.424	0	0.013	0.014	TYD-0.1%-	0.0063368	0.0195017	-0.147	-0.15	0	-0.001
1195	CuOTYN/AAmpicillin	2.28092	7.11607	-0.392114	0.907285	0.999189	0.403208	CHEMBL174	CuO	TY	N/A	Ampicillin	MIC nM	-1	2500	MIC (uM)	Salmonella enterica subsp. enterica serovar Typhi	n.d	TY	Gram	Systemic	Bacillus sbtilis	MD	N/A	None	None	0	t	0.151	0	0.013	0.014	TYD-0.1%-	0.0063368	0.0195017	-0.147	-0.15	0	-0.001
1196	AuTYPDT/DMBAmpicillin	7.04927	11.8844	4.37624	0.999133	0.999993	0.987584	CHEMBL174	Au	TY	PDT/DMB	Ampicillin	MIC nM	-1	2500	MBC (uM)	Salmonella enterica subsp. enterica serovar Typhimurium	n.d	TY	Gram	Systemic	Klebsiella pneumoniae	MDR	Spherical	Double	Monomer	0	v	0.115	0	0.013	0.014	TYD-0.1%-	0.0063368	0.0195017	-0.143	-0.119	-0.001	-0.001
1197	AuTYPDT/AChAmpicillin	8.36757	13.2027	5.69453	0.999768	0.999998	0.996647	CHEMBL174	Au	TY	PDT/ACh	Ampicillin	MIC nM	-1	2500	MBC (uM)	Salmonella enterica subsp. enterica serovar Typhimurium	n.d	TY	Gram	Systemic	Klebsiella pneumoniae	MDR	Spherical	Double	Monomer	0	t	0.115	0	0.013	0.014	TYD-0.1%-	0.0063368	0.0195017	-0.143	-0.109	-0.001	-0.001
1198	AuTYPDTAmpicillin	6.51674	11.3519	3.8437	0.998524	0.999988	0.979035	CHEMBL174	Au	TY	PDT	Ampicillin	MIC50 ug.mL-1	-1	21.529	MBC (uM)	Salmonella enterica subsp. enterica serovar Typhimurium	n.d	TY	Gram	Systemic	Escherichia coli	ATCC11775	Spherical	Single	Monomer	0	t	0.373	0	0.013	0.014	TYD-0.1%-	0.0063368	0.0195017	-0.143	-0.134	-0.001	-0.001
1199	AuTYPDT/MelAmpicillin	11.12	15.9552	8.447	0.999985	1	0.999786	CHEMBL174	Au	TY	PDT/Mel	Ampicillin	MIC ug.mL-1	-1	50	MBC (uM)	Salmonella enterica subsp. enterica serovar Typhimurium	n.d	TY	Gram	Systemic	Staphylococcus aureus	ATCC6538P	Spherical	Double	Monomer	0	v	0.324	0	0.013	0.014	TYD-0.1%-	0.0063368	0.0195017	-0.144	-0.093	-0.001	-0.001
1200	AuTYPDT/AChAmpicillin	9.01077	13.8459	6.33773	0.999878	0.999999	0.998235	CHEMBL174	Au	TY	PDT/ACh	Ampicillin	MIC ug.mL-1	-1	50	MBC (uM)	Salmonella enterica subsp. enterica serovar Typhimurium	n.d	TY	Gram	Systemic	Staphylococcus aureus	ATCC6538P	Spherical	Double	Monomer	0	t	0.324	0	0.013	0.014	TYD-0.1%-	0.0063368	0.0195017	-0.144	-0.109	-0.001	-0.001
1201	AuTYPDT/CQAmpicillin	9.40626	14.2414	6.73322	0.999918	0.999999	0.998811	CHEMBL174	Au	TY	PDT/CQ	Ampicillin	MIC ug.mL-1	-1	50	MBC (uM)	Salmonella enterica subsp. enterica serovar Typhimurium	n.d	TY	Gram	Systemic	Staphylococcus aureus	ATCC6538P	Spherical	Double	Monomer	0	t	0.324	0	0.013	0.014	TYD-0.1%-	0.0063368	0.0195017	-0.144	-0.106	-0.001	-0.001
1202	AuTYPDT/CPBAmpicillin	9.01077	13.8459	6.33773	0.999878	0.999999	0.998235	CHEMBL174	Au	TY	PDT/CPB	Ampicillin	MIC ug.mL-1	-1	50	MBC (uM)	Salmonella enterica subsp. enterica serovar Typhimurium	n.d	TY	Gram	Systemic	Staphylococcus aureus	ATCC6538P	Spherical	Double	Monomer	0	v	0.324	0	0.013	0.014	TYD-0.1%-	0.0063368	0.0195017	-0.144	-0.109	-0.001	-0.001
1203	AuTYPDT/GAmpicillin	9.93358	14.7687	7.26054	0.999951	1	0.999298	CHEMBL174	Au	TY	PDT/G	Ampicillin	MIC ug.mL-1	-1	50	MBC (uM)	Salmonella enterica subsp. enterica serovar Typhimurium	n.d	TY	Gram	Systemic	Staphylococcus aureus	ATCC6538P	Spherical	Double	Monomer	0	t	0.324	0	0.013	0.014	TYD-0.1%-	0.0063368	0.0195017	-0.144	-0.102	-0.001	-0.001
1204	Fe2O3TYN/AAmpicillin	2.07931	6.91446	-0.593729	0.888876	0.999008	0.35578	CHEMBL174	Fe2O3	TY	N/A	Ampicillin	MIC nM	-1	2500	MBC (uM)	Salmonella enterica subsp. enterica serovar Typhimurium	14028S	TY	Gram	Systemic	Bacillus sbtilis	MD	N/A	None	None	0	t	0.115	0	0.013	0.014	TYD-0.1%-	0.0063368	0.0195017	-0.147	-0.15	0	-0.001
1205	Fe2O3TYN/AAmpicillin	3.24979	8.08494	0.576756	0.962666	0.999692	0.640321	CHEMBL174	Fe2O3	TY	N/A	Ampicillin	MIC ug.mL-1	-1	50	MBC (uM)	Salmonella enterica subsp. enterica serovar Typhimurium	ATCC14028	TY	Gram	Systemic	Bacillus sbtilis	MD	N/A	None	None	0	t	0.324	0	0.013	0.014	TYD-0.1%-	0.0063368	0.0195017	-0.147	-0.15	0	-0.001
1206	AgTYN/AAmpicillin	3.63374	8.46889	0.960706	0.974263	0.99979	0.723263	CHEMBL174	Ag	TY	N/A	Ampicillin	MIC99 ug ml-1	-1	161.696	MBC (uM)	Salmonella enterica subsp. enterica serovar Typhimurium	MTCC 98	TY	Gram	Systemic	Bacillus subtilis	ATCC6633	Spherical	None	None	0	t	0.263	0	0.013	0.014	TYD-0.1%-	0.0063368	0.0195017	-0.147	-0.135	-0.001	-0.002
1207	CuOTYN/AAmpicillin	3.24979	8.08494	0.576756	0.962666	0.999692	0.640321	CHEMBL174	CuO	TY	N/A	Ampicillin	MIC ug.mL-1	-1	50	MBC (uM)	Salmonella enterica subsp. enterica serovar Typhimurium	ATCC14028	TY	Gram	Systemic	Bacillus sbtilis	MD	N/A	None	None	0	t	0.324	0	0.013	0.014	TYD-0.1%-	0.0063368	0.0195017	-0.147	-0.15	0	-0.001
1208	CuOTYN/AAmpicillin	2.13126	6.9664	-0.541782	0.893904	0.999058	0.367773	CHEMBL174	CuO	TY	N/A	Ampicillin	MIC nM	-1	2500	MBC (uM)	Salmonella enterica subsp. enterica serovar Typhimurium	ATCC23564	TY	Gram	Systemic	Bacillus sbtilis	MD	N/A	None	None	0	t	0.115	0	0.013	0.014	TYD-0.1%-	0.0063368	0.0195017	-0.147	-0.15	0	0.001
1209	CuTYN/AAmpicillin	2.01473	6.84988	-0.658311	0.882335	0.998942	0.341119	CHEMBL174	Cu	TY	N/A	Ampicillin	MBC 10'-2 umol/ml	-1	14.846	MBC (uM)	Salmonella enterica subsp. enterica serovar Typhimurium	ATCC13311	TY	Gram	Systemic	Bacillus subtilis	ATCC6633	Spherical	None	None	0	t	0.327	0	0.013	0.014	TYD-0.1%-	0.0063368	0.0195017	-0.147	-0.15	-0.001	-0.002
1210	CuTYN/AAmpicillin	2.0743	6.90945	-0.598735	0.88838	0.999003	0.354633	CHEMBL174	Cu	TY	N/A	Ampicillin	MBC ug ml-1	-1	117.213	MBC (uM)	Salmonella enterica subsp. enterica serovar Typhimurium	NCIM-3471	TY	Gram	Systemic	Bacillus subtilis	ATCC6633	Spherical	None	None	0	t	0.333	0	0.013	0.014	TYD-0.1%-	0.0063368	0.0195017	-0.147	-0.15	-0.001	-0.001
1211	CuOTYN/AAmpicillin	3.24979	8.08494	0.576756	0.962666	0.999692	0.640321	CHEMBL174	CuO	TY	N/A	Ampicillin	MIC ug.mL-1	-1	50	MBC (uM)	Salmonella enterica subsp. enterica serovar Typhimurium	ATCC14028	TY	Gram	Systemic	Bacillus sbtilis	MD	N/A	None	None	0	t	0.324	0	0.013	0.014	TYD-0.1%-	0.0063368	0.0195017	-0.147	-0.15	0	-0.001
1212	CuOTYN/AAmpicillin	3.66017	8.49532	0.98713	0.974917	0.999796	0.728521	CHEMBL174	CuO	TY	N/A	Ampicillin	IZ mm	1	5	MBC (uM)	Salmonella enterica subsp. enterica serovar Typhimurium	ATCC23564	TY	Gram	Systemic	Bacillus sbtilis	MD	N/A	None	None	0	t	0.388	0	0.013	0.014	TYD-0.1%-	0.0063368	0.0195017	-0.147	-0.15	0	0.001
1213	CuITYN/AAmpicillin	4.04546	8.88061	1.37243	0.982799	0.999861	0.797772	CHEMBL174	CuI	TY	N/A	Ampicillin	MIC 10'-2 umol/ml	-1	10.237	MBC (uM)	Salmonella enterica subsp. enterica serovar Typhimurium	ATCC13311	TY	Gram	Systemic	Bacillus subtilis	ATCC6633	N/A	None	None	0	t	0.313	0	0.013	0.014	TYD-0.1%-	0.0063368	0.0195017	-0.143	-0.15	-0.001	-0.002
1214	CuITYN/AAmpicillin	4.12387	8.95902	1.45083	0.984076	0.999871	0.810127	CHEMBL174	CuI	TY	N/A	Ampicillin	MBC 10'-2 umol/ml	-1	14.846	MBC (uM)	Salmonella enterica subsp. enterica serovar Typhimurium	ATCC13311	TY	Gram	Systemic	Bacillus subtilis	ATCC6633	N/A	None	None	0	v	0.327	0	0.013	0.014	TYD-0.1%-	0.0063368	0.0195017	-0.143	-0.15	-0.001	-0.002
1215	CuITYN/AAmpicillin	4.13304	8.96819	1.46001	0.984219	0.999873	0.811533	CHEMBL174	CuI	TY	N/A	Ampicillin	MIC ug.mL-1	-1	50	MBC (uM)	Salmonella enterica subsp. enterica serovar Typhimurium	NCIM-3471	TY	Gram	Systemic	Bacillus subtilis	ATCC6633	N/A	None	None	0	t	0.324	0	0.013	0.014	TYD-0.1%-	0.0063368	0.0195017	-0.143	-0.15	-0.001	-0.001
1216	CuOTYN/AAmpicillin	3.24979	8.08494	0.576756	0.962666	0.999692	0.640321	CHEMBL174	CuO	TY	N/A	Ampicillin	MIC ug.mL-1	-1	50	MBC (uM)	Salmonella enterica subsp. enterica serovar Typhimurium	ATCC14028	TY	Gram	Systemic	Bacillus sbtilis	MD	N/A	None	None	0	t	0.324	0	0.013	0.014	TYD-0.1%-	0.0063368	0.0195017	-0.147	-0.15	0	-0.001
1217	CuOTYN/AAmpicillin	3.66017	8.49532	0.98713	0.974917	0.999796	0.728521	CHEMBL174	CuO	TY	N/A	Ampicillin	IZ mm	1	5	MBC (uM)	Salmonella enterica subsp. enterica serovar Typhimurium	ATCC23564	TY	Gram	Systemic	Bacillus sbtilis	MD	N/A	None	None	0	t	0.388	0	0.013	0.014	TYD-0.1%-	0.0063368	0.0195017	-0.147	-0.15	0	0.001
1218	CuOTYN/AAmpicillin	3.24979	8.08494	0.576756	0.962666	0.999692	0.640321	CHEMBL174	CuO	TY	N/A	Ampicillin	MIC ug.mL-1	-1	50	MBC (uM)	Salmonella enterica subsp. enterica serovar Typhimurium	ATCC14028	TY	Gram	Systemic	Bacillus sbtilis	MD	N/A	None	None	0	t	0.324	0	0.013	0.014	TYD-0.1%-	0.0063368	0.0195017	-0.147	-0.15	0	-0.001
1219	CuOTYN/AAmpicillin	3.66017	8.49532	0.98713	0.974917	0.999796	0.728521	CHEMBL174	CuO	TY	N/A	Ampicillin	IZ mm	1	5	MBC (uM)	Salmonella enterica subsp. enterica serovar Typhimurium	ATCC23564	TY	Gram	Systemic	Bacillus sbtilis	MD	N/A	None	None	0	t	0.388	0	0.013	0.014	TYD-0.1%-	0.0063368	0.0195017	-0.147	-0.15	0	0.001
1220	AgTYN/AAmpicillin	5.5832	10.4183	2.91016	0.996254	0.99997	0.948347	CHEMBL174	Ag	TY	N/A	Ampicillin	MIC ug.mL-1	-1	50	MBC (uM)	Salmonella enterica subsp. enterica serovar Typhimurium	n.d	TY	Gram	Systemic	Staphylococcus aureus	ATCC6538P	Spherical	None	None	0	t	0.324	0	0.013	0.014	TYD-0.1%-	0.0063368	0.0195017	-0.144	-0.135	-0.001	-0.001
1221	AgTYGlutathioneAmpicillin	2.37112	7.20627	-0.301913	0.914599	0.999259	0.42509	CHEMBL174	Ag	TY	Glutathione	Ampicillin	MIC90 ug.mL-1	-1	34.891	Microb-Eff	Salmonella enterica subsp. enterica serovar Typhimurium	n.d	TY	Gram	Systemic	Escherichia coli	ATCC10536	Spherical	Single	Monomer	0	v	0.386	0	0.013	0.014	TYD-0.1%-	0.0063368	0.0195017	-0.147	-0.15	-0.001	-0.001
1222	AuTYPDT/MelAmpicillin	12.6722	17.5074	9.99916	0.999997	1	0.999955	CHEMBL174	Au	TY	PDT/Mel	Ampicillin	IZ mm	1	5	MIC (uM)	Salmonella enterica subsp. enterica serovar Typhimurium	n.d	TY	Gram	Systemic	Klebsiella pneumoniae	MDR	Spherical	Double	Monomer	0	t	0.507	0	0.013	0.014	TYD-0.1%-	0.0063368	0.0195017	-0.143	-0.093	-0.001	-0.001
1223	AuTYPDT/GAmpicillin	10.2032	15.0384	7.5302	0.999963	1	0.999464	CHEMBL174	Au	TY	PDT/G	Ampicillin	MBC 10'-2micromol/ml	-1	53.457	MIC (uM)	Salmonella enterica subsp. enterica serovar Typhimurium	n.d	TY	Gram	Systemic	Pseudomonas aeruginosa	MDR	Spherical	Double	Monomer	0	t	0.278	0	0.013	0.014	TYD-0.1%-	0.0063368	0.0195017	-0.143	-0.102	-0.001	-0.001
1224	AgTYLactoseAmpicillin	2.8609	7.69605	0.187865	0.94588	0.999546	0.546829	CHEMBL174	Ag	TY	Lactose	Ampicillin	Activity %	1	70	MIC (uM)	Salmonella enterica subsp. enterica serovar Typhimurium	n.d	TY	Gram	Systemic	Pseudomonas aeruginosa	ATCC27853	Spherical	Single	Monomer	0	v	0.191	0	0.013	0.014	TYD-0.1%-	0.0063368	0.0195017	-0.144	-0.15	-0.001	-0.001
1225	AgTYGlucoseAmpicillin	2.8609	7.69605	0.187865	0.94588	0.999546	0.546829	CHEMBL174	Ag	TY	Glucose	Ampicillin	Activity %	1	70	MIC (uM)	Salmonella enterica subsp. enterica serovar Typhimurium	n.d	TY	Gram	Systemic	Pseudomonas aeruginosa	ATCC27853	Spherical	Single	Monomer	0	t	0.191	0	0.013	0.014	TYD-0.1%-	0.0063368	0.0195017	-0.144	-0.15	-0.001	-0.001
1226	CuTYN/AAmpicillin	2.47956	7.31471	-0.193477	0.922696	0.999335	0.451781	CHEMBL174	Cu	TY	N/A	Ampicillin	MIC 10'-2 umol/ml	-1	10.237	MIC (uM)	Salmonella enterica subsp. enterica serovar Typhimurium	ATCC13311	TY	Gram	Systemic	Bacillus subtilis	ATCC6633	Spherical	None	None	0	t	0.41	0	0.013	0.014	TYD-0.1%-	0.0063368	0.0195017	-0.147	-0.15	-0.001	-0.002
1227	AgTYN/AAmpicillin	4.61333	9.44848	1.94029	0.990179	0.999921	0.874384	CHEMBL174	Ag	TY	N/A	Ampicillin	MIC ug.mL-1	-1	50	MIC (uM)	Salmonella enterica subsp. enterica serovar Typhimurium	LT2	TY	Gram	Systemic	Bacillus subtilis	ATCC6633	Spherical	None	None	0	t	0.424	0	0.013	0.014	TYD-0.1%-	0.0063368	0.0195017	-0.147	-0.135	-0.001	0.001
1228	CuOTYN/AAmpicillin	3.80983	8.64498	1.1368	0.978328	0.999824	0.757091	CHEMBL174	CuO	TY	N/A	Ampicillin	MIC ug.mL-1	-1	50	MIC (uM)	Salmonella enterica subsp. enterica serovar Typhimurium	ATCC14028	TY	Gram	Systemic	Bacillus sbtilis	MD	N/A	None	None	0	t	0.424	0	0.013	0.014	TYD-0.1%-	0.0063368	0.0195017	-0.147	-0.15	0	-0.001
1229	CuOTYN/AAmpicillin	4.32662	9.16176	1.65358	0.98696	0.999895	0.839374	CHEMBL174	CuO	TY	N/A	Ampicillin	IZ mm	1	5	MIC (uM)	Salmonella enterica subsp. enterica serovar Typhimurium	ATCC23564	TY	Gram	Systemic	Bacillus sbtilis	MD	N/A	None	None	0	v	0.507	0	0.013	0.014	TYD-0.1%-	0.0063368	0.0195017	-0.147	-0.15	0	0.001
1230	CuOTYN/AAmpicillin	3.07618	7.91133	0.403144	0.955899	0.999634	0.599443	CHEMBL174	CuO	TY	N/A	Ampicillin	MIC 10'-2micromol/ml	-1	33.333	MIC (uM)	Salmonella enterica subsp. enterica serovar Typhimurium	n.d	TY	Gram	Systemic	Pseudomonas aeruginosa	MD	N/A	None	None	0	v	0.293	0	0.013	0.014	TYD-0.1%-	0.0063368	0.0195017	-0.147	-0.15	0	-0.001
1231	CuOTYN/AAmpicillin	3.80983	8.64498	1.1368	0.978328	0.999824	0.757091	CHEMBL174	CuO	TY	N/A	Ampicillin	MIC ug.mL-1	-1	50	MIC (uM)	Salmonella enterica subsp. enterica serovar Typhimurium	ATCC14028	TY	Gram	Systemic	Bacillus sbtilis	MD	N/A	None	None	0	t	0.424	0	0.013	0.014	TYD-0.1%-	0.0063368	0.0195017	-0.147	-0.15	0	-0.001
1232	CuITYN/AAmpicillin	4.5887	9.42385	1.91567	0.989936	0.999919	0.871654	CHEMBL174	CuI	TY	N/A	Ampicillin	MIC 10'-2 umol/ml	-1	10.237	MIC (uM)	Salmonella enterica subsp. enterica serovar Typhimurium	ATCC13311	TY	Gram	Systemic	Bacillus subtilis	ATCC6633	N/A	None	None	0	t	0.41	0	0.013	0.014	TYD-0.1%-	0.0063368	0.0195017	-0.143	-0.15	-0.001	-0.002
1233	CuOTYN/AAmpicillin	3.41423	8.24938	0.741197	0.968146	0.999739	0.677258	CHEMBL174	CuO	TY	N/A	Ampicillin	MBC99.5 10'-2 umol/ml	-1	29.399	MIC (uM)	Salmonella enterica subsp. enterica serovar Typhimurium	ATCC13311	TY	Gram	Systemic	Bacillus sbtilis	MD	N/A	None	None	0	t	0.358	0	0.013	0.014	TYD-0.1%-	0.0063368	0.0195017	-0.147	-0.15	0	-0.002
1234	CuOTYN/AAmpicillin	3.80983	8.64498	1.1368	0.978328	0.999824	0.757091	CHEMBL174	CuO	TY	N/A	Ampicillin	MIC ug.mL-1	-1	50	MIC (uM)	Salmonella enterica subsp. enterica serovar Typhimurium	ATCC14028	TY	Gram	Systemic	Bacillus sbtilis	MD	N/A	None	None	0	t	0.424	0	0.013	0.014	TYD-0.1%-	0.0063368	0.0195017	-0.147	-0.15	0	-0.001
1235	CuOTYN/AAmpicillin	3.78386	8.61901	1.11082	0.977771	0.999819	0.752283	CHEMBL174	CuO	TY	N/A	Ampicillin	MIC ug.mL-1	-1	50	MIC (uM)	Salmonella enterica subsp. enterica serovar Typhimurium	MTCC 98	TY	Gram	Systemic	Bacillus sbtilis	MD	N/A	None	None	0	t	0.424	0	0.013	0.014	TYD-0.1%-	0.0063368	0.0195017	-0.147	-0.15	0	-0.002
1236	CuOTYN/AAmpicillin	3.80983	8.64498	1.1368	0.978328	0.999824	0.757091	CHEMBL174	CuO	TY	N/A	Ampicillin	MIC ug.mL-1	-1	50	MIC (uM)	Salmonella enterica subsp. enterica serovar Typhimurium	ATCC14028	TY	Gram	Systemic	Bacillus sbtilis	MD	N/A	None	None	0	v	0.424	0	0.013	0.014	TYD-0.1%-	0.0063368	0.0195017	-0.147	-0.15	0	-0.001
1237	AgTYGlutathioneAmpicillin	2.58394	7.41909	-0.0890978	0.929821	0.999401	0.47774	CHEMBL174	Ag	TY	Glutathione	Ampicillin	MIC ug.mL-1	-1	50	MIC (uM)	Salmonella enterica subsp. enterica serovar Typhimurium	n.d	TY	Gram	Systemic	Staphylococcus aureus	ATCC6538	Spherical	Single	Monomer	0	v	0.424	0	0.013	0.014	TYD-0.1%-	0.0063368	0.0195017	-0.147	-0.15	-0.001	-0.001
1238	CuTYN/AAmpicillin	0.753453	5.5886	-1.91958	0.679931	0.996274	0.127908	CHEMBL174	Cu	TY	N/A	Ampicillin	IC50 ug.mL-1	1	2000	MIC (uM)	Salmonella enterica subsp. enterica serovar Typhimurium	n.d	TY	Gram	Systemic	Escherichia coli	ATCC8739	Spherical	None	None	0	t	0.003	0	0.013	0.014	TYD-0.1%-	0.0063368	0.0195017	-0.146	-0.15	-0.001	-0.001
1239	CuOTYN/AAmpicillin	3.32771	8.16286	0.654677	0.965367	0.999715	0.658064	CHEMBL174	CuO	TY	N/A	Ampicillin	MIC ug.mL-1	-1	50	MBC (uM)	Salmonella enterica subsp. enterica serovar Typhimurium str. LT2	DA6192	TY	Gram	Systemic	Bacillus sbtilis	MD	N/A	None	None	0	t	0.324	0	0.013	0.014	TYD-0.1%-	0.0063368	0.0195017	-0.147	-0.15	0	0.002
1240	CuTYN/AAmpicillin	2.58394	7.41909	-0.0890978	0.929821	0.999401	0.47774	CHEMBL174	Cu	TY	N/A	Ampicillin	MIC ug.mL-1	-1	50	MIC (uM)	Salmonella enterica subsp. enterica serovar Typhimurium str. LT2	DA10899	TY	Gram	Systemic	Bacillus subtilis	ATCC6633	Spherical	None	None	0	v	0.424	0	0.013	0.014	TYD-0.1%-	0.0063368	0.0195017	-0.147	-0.15	-0.001	-0.001
1241	CuOTYN/AAmpicillin	3.88776	8.7229	1.21472	0.97992	0.999837	0.771133	CHEMBL174	CuO	TY	N/A	Ampicillin	MIC ug.mL-1	-1	50	MIC (uM)	Salmonella enterica subsp. enterica serovar Typhimurium str. LT2	DA12088	TY	Gram	Systemic	Bacillus sbtilis	MD	N/A	None	None	0	t	0.424	0	0.013	0.014	TYD-0.1%-	0.0063368	0.0195017	-0.147	-0.15	0	0.002
1242	AuPNPDT/CQAmpicillin	7.67234	76.7697	4.0438	0.999535	1	0.982771	CHEMBL174	Au	PN	PDT/CQ	Ampicillin	Activity %	1	70	MBC (uM)	Streptococcus pneumoniae	n.d	PN	Gram	Respiratory	Escherichia coli	ATCC11775	Spherical	Double	Monomer	0	t	0.146	0	0.072	0.074	PND-0.1%-	0.00745884	0.0793328	-0.143	-0.106	-0.001	-0.001
1243	ZnOPNN/AAmpicillin	2.11533	71.2127	-1.51321	0.892384	1	0.180463	CHEMBL174	ZnO	PN	N/A	Ampicillin	MIC ug.mL-1	-1	50	MBC (uM)	Streptococcus pneumoniae	MTCC 1936	PN	Gram	Respiratory	Bacillus sbtilis	MD	N/A	None	None	0	t	0.324	0	0.072	0.074	PND-0.1%-	0.00745884	0.0793328	-0.147	-0.15	0	0.004
1244	ZnOPNN/AAmpicillin	1.98546	71.0828	-1.64308	0.879262	1	0.162046	CHEMBL174	ZnO	PN	N/A	Ampicillin	MIC ug.mL-1	-1	50	MBC (uM)	Streptococcus pneumoniae	n.d	PN	Gram	Respiratory	Bacillus sbtilis	MD	N/A	None	None	0	v	0.324	0	0.072	0.074	PND-0.1%-	0.00745884	0.0793328	-0.147	-0.15	0	-0.001
1245	CuOPNN/AAmpicillin	2.11533	71.2127	-1.51321	0.892384	1	0.180463	CHEMBL174	CuO	PN	N/A	Ampicillin	MIC ug.mL-1	-1	50	MBC (uM)	Streptococcus pneumoniae	MTCC 1936	PN	Gram	Respiratory	Bacillus sbtilis	MD	N/A	None	None	0	t	0.324	0	0.072	0.074	PND-0.1%-	0.00745884	0.0793328	-0.147	-0.15	0	0.004
1246	CuOPNN/AAmpicillin	1.98546	71.0828	-1.64308	0.879262	1	0.162046	CHEMBL174	CuO	PN	N/A	Ampicillin	MIC ug.mL-1	-1	50	MBC (uM)	Streptococcus pneumoniae	n.d	PN	Gram	Respiratory	Bacillus sbtilis	MD	N/A	None	None	0	t	0.324	0	0.072	0.074	PND-0.1%-	0.00745884	0.0793328	-0.147	-0.15	0	-0.001
1247	Fe2O3PNN/AAmpicillin	2.11533	71.2127	-1.51321	0.892384	1	0.180463	CHEMBL174	Fe2O3	PN	N/A	Ampicillin	MIC ug.mL-1	-1	50	MBC (uM)	Streptococcus pneumoniae	MTCC 1936	PN	Gram	Respiratory	Bacillus sbtilis	MD	N/A	None	None	0	v	0.324	0	0.072	0.074	PND-0.1%-	0.00745884	0.0793328	-0.147	-0.15	0	0.004
1248	Fe2O3PNN/AAmpicillin	1.98546	71.0828	-1.64308	0.879262	1	0.162046	CHEMBL174	Fe2O3	PN	N/A	Ampicillin	MIC ug.mL-1	-1	50	MBC (uM)	Streptococcus pneumoniae	n.d	PN	Gram	Respiratory	Bacillus sbtilis	MD	N/A	None	None	0	t	0.324	0	0.072	0.074	PND-0.1%-	0.00745884	0.0793328	-0.147	-0.15	0	-0.001
1249	AgPNN/AAmpicillin	2.52525	71.6226	-1.10329	0.925893	1	0.249124	CHEMBL174	Ag	PN	N/A	Ampicillin	MIC99 ug ml-1	-1	161.696	MBC (uM)	Streptococcus pneumoniae	MTCC 1936	PN	Gram	Respiratory	Bacillus subtilis	ATCC6633	Spherical	None	None	0	t	0.263	0	0.072	0.074	PND-0.1%-	0.00745884	0.0793328	-0.147	-0.135	-0.001	0.004
1250	CuOPNN/AAmpicillin	1.98546	71.0828	-1.64308	0.879262	1	0.162046	CHEMBL174	CuO	PN	N/A	Ampicillin	MIC ug.mL-1	-1	50	MBC (uM)	Streptococcus pneumoniae	n.d	PN	Gram	Respiratory	Bacillus sbtilis	MD	N/A	None	None	0	t	0.324	0	0.072	0.074	PND-0.1%-	0.00745884	0.0793328	-0.147	-0.15	0	-0.001
1251	CuPNN/AAmpicillin	0.889436	69.9868	-2.73911	0.708774	1	0.0607047	CHEMBL174	Cu	PN	N/A	Ampicillin	MIC ug.mL-1	-1	50	MBC (uM)	Streptococcus pneumoniae	MTCC 1936	PN	Gram	Respiratory	Bacillus subtilis	ATCC6633	Spherical	None	None	0	v	0.324	0	0.072	0.074	PND-0.1%-	0.00745884	0.0793328	-0.147	-0.15	-0.001	0.004
1252	CuOPNN/AAmpicillin	2.11533	71.2127	-1.51321	0.892384	1	0.180463	CHEMBL174	CuO	PN	N/A	Ampicillin	MIC ug.mL-1	-1	50	MBC (uM)	Streptococcus pneumoniae	MTCC 1936	PN	Gram	Respiratory	Bacillus sbtilis	MD	N/A	None	None	0	t	0.324	0	0.072	0.074	PND-0.1%-	0.00745884	0.0793328	-0.147	-0.15	0	0.004
1253	CuOPNN/AAmpicillin	2.10307	71.2004	-1.52547	0.891201	1	0.178657	CHEMBL174	CuO	PN	N/A	Ampicillin	MIC90 ug.mL-1	-1	34.891	MBC (uM)	Streptococcus pneumoniae	n.d	PN	Gram	Respiratory	Bacillus sbtilis	MD	N/A	None	None	0	v	0.345	0	0.072	0.074	PND-0.1%-	0.00745884	0.0793328	-0.147	-0.15	0	-0.001
1254	CuOPNN/AAmpicillin	2.10307	71.2004	-1.52547	0.891201	1	0.178657	CHEMBL174	CuO	PN	N/A	Ampicillin	MIC90 ug.mL-1	-1	34.891	MBC (uM)	Streptococcus pneumoniae	n.d	PN	Gram	Respiratory	Bacillus sbtilis	MD	N/A	None	None	0	t	0.345	0	0.072	0.074	PND-0.1%-	0.00745884	0.0793328	-0.147	-0.15	0	-0.001
1255	CuOPNN/AAmpicillin	2.25988	71.3572	-1.36866	0.9055	1	0.202836	CHEMBL174	CuO	PN	N/A	Ampicillin	MIC50 ug.mL-1	-1	21.529	MBC (uM)	Streptococcus pneumoniae	n.d	PN	Gram	Respiratory	Bacillus sbtilis	MD	N/A	None	None	0	t	0.373	0	0.072	0.074	PND-0.1%-	0.00745884	0.0793328	-0.147	-0.15	0	-0.001
1256	CuOPNN/AAmpicillin	2.11533	71.2127	-1.51321	0.892384	1	0.180463	CHEMBL174	CuO	PN	N/A	Ampicillin	MIC ug.mL-1	-1	50	MBC (uM)	Streptococcus pneumoniae	MTCC 1936	PN	Gram	Respiratory	Bacillus sbtilis	MD	N/A	None	None	0	t	0.324	0	0.072	0.074	PND-0.1%-	0.00745884	0.0793328	-0.147	-0.15	0	0.004
1257	CuOPNN/AAmpicillin	2.25988	71.3572	-1.36866	0.9055	1	0.202836	CHEMBL174	CuO	PN	N/A	Ampicillin	MIC50 ug.mL-1	-1	21.529	MBC (uM)	Streptococcus pneumoniae	n.d	PN	Gram	Respiratory	Bacillus sbtilis	MD	N/A	None	None	0	t	0.373	0	0.072	0.074	PND-0.1%-	0.00745884	0.0793328	-0.147	-0.15	0	-0.001
1258	AuPNPDT/CPBAmpicillin	6.47599	75.5733	2.84745	0.998462	1	0.945187	CHEMBL174	Au	PN	PDT/CPB	Ampicillin	IC50 ug.mL-1	1	2000	MIC (uM)	Streptococcus pneumoniae	n.d	PN	Gram	Respiratory	Escherichia coli	ATCC11775	Spherical	Double	Monomer	0	t	0.003	0	0.072	0.074	PND-0.1%-	0.00745884	0.0793328	-0.143	-0.109	-0.001	-0.001
1259	AgPNGlucoseAmpicillin	1.01659	70.1139	-2.61195	0.734308	1	0.0683732	CHEMBL174	Ag	PN	Glucose	Ampicillin	MIC nM	-1	2500	MIC (uM)	Streptococcus pneumoniae	n.d	PN	Gram	Respiratory	Escherichia coli	ATCC25922	Spherical	Single	Monomer	0	t	0.151	0	0.072	0.074	PND-0.1%-	0.00745884	0.0793328	-0.147	-0.15	0	-0.001
1260	CuIPNN/AAmpicillin	3.50667	72.604	-0.12187	0.970877	1	0.46957	CHEMBL174	CuI	PN	N/A	Ampicillin	MIC ug.mL-1	-1	50	MIC (uM)	Streptococcus pneumoniae	RCMB 010010	PN	Gram	Respiratory	Escherichia coli	K-12	N/A	None	None	0	t	0.424	0	0.072	0.074	PND-0.1%-	0.00745884	0.0793328	-0.143	-0.15	-0.001	0.002
1261	AgPNN/AAmpicillin	2.99404	72.0914	-0.634508	0.952304	1	0.346489	CHEMBL174	Ag	PN	N/A	Ampicillin	MIC nM	-1	2500	MIC (uM)	Streptococcus pneumoniae	n.d	PN	Gram	Respiratory	Escherichia coli	ATCC25922	Spherical	None	None	0	t	0.151	0	0.072	0.074	PND-0.1%-	0.00745884	0.0793328	-0.147	-0.135	0	-0.001
1262	AgPNN/AAmpicillin	3.42692	72.5243	-0.201624	0.968535	1	0.449764	CHEMBL174	Ag	PN	N/A	Ampicillin	MIC ug.mL-1	-1	50	MIC (uM)	Streptococcus pneumoniae	MTCC 1936	PN	Gram	Respiratory	Bacillus subtilis	ATCC6633	Spherical	None	None	0	v	0.424	0	0.072	0.074	PND-0.1%-	0.00745884	0.0793328	-0.147	-0.135	-0.001	0.004
1263	CuOPNN/AAmpicillin	2.67537	71.7727	-0.953172	0.935558	1	0.278247	CHEMBL174	CuO	PN	N/A	Ampicillin	MIC ug.mL-1	-1	50	MIC (uM)	Streptococcus pneumoniae	MTCC 1936	PN	Gram	Respiratory	Bacillus sbtilis	MD	N/A	None	None	0	t	0.424	0	0.072	0.074	PND-0.1%-	0.00745884	0.0793328	-0.147	-0.15	0	0.004
1264	CuOPNN/AAmpicillin	2.4279	71.5252	-1.20065	0.91893	1	0.23136	CHEMBL174	CuO	PN	N/A	Ampicillin	MIC80 ug.mL-1	-1	122.142	MIC (uM)	Streptococcus pneumoniae	n.d	PN	Gram	Respiratory	Bacillus sbtilis	MD	N/A	None	None	0	t	0.403	0	0.072	0.074	PND-0.1%-	0.00745884	0.0793328	-0.147	-0.15	0	-0.001
1265	CuOPNN/AAmpicillin	2.67537	71.7727	-0.953172	0.935558	1	0.278247	CHEMBL174	CuO	PN	N/A	Ampicillin	MIC ug.mL-1	-1	50	MIC (uM)	Streptococcus pneumoniae	MTCC 1936	PN	Gram	Respiratory	Bacillus sbtilis	MD	N/A	None	None	0	t	0.424	0	0.072	0.074	PND-0.1%-	0.00745884	0.0793328	-0.147	-0.15	0	0.004
1266	CuIPNN/AAmpicillin	4.23164	73.329	0.603096	0.98568	1	0.646364	CHEMBL174	CuI	PN	N/A	Ampicillin	IC50 nM	1	100	MIC (uM)	Streptococcus pneumoniae	CGMCC 1.1692	PN	Gram	Respiratory	Bacillus subtilis	ATCC6633	N/A	None	None	0	v	0.572	0	0.072	0.074	PND-0.1%-	0.00745884	0.0793328	-0.143	-0.15	-0.001	-0.002
1267	CuIPNN/AAmpicillin	3.55862	72.656	-0.0699234	0.97231	1	0.482526	CHEMBL174	CuI	PN	N/A	Ampicillin	MIC ug.mL-1	-1	50	MIC (uM)	Streptococcus pneumoniae	MTCC 1936	PN	Gram	Respiratory	Bacillus subtilis	ATCC6633	N/A	None	None	0	t	0.424	0	0.072	0.074	PND-0.1%-	0.00745884	0.0793328	-0.143	-0.15	-0.001	0.004
1268	CuPNN/AAmpicillin	1.86236	70.9597	-1.76618	0.865572	1	0.146018	CHEMBL174	Cu	PN	N/A	Ampicillin	IZ mm	1	5	MIC (uM)	Streptococcus pneumoniae	RCMB 010010	PN	Gram	Respiratory	Escherichia coli	ATCC10536	Spherical	None	None	0	t	0.507	0	0.072	0.074	PND-0.1%-	0.00745884	0.0793328	-0.147	-0.15	-0.001	0.002
1269	CdSSTN/AAmpicillin	2.2876	73.4428	-1.66988	0.907845	1	0.15844	CHEMBL174	CdS	ST	N/A	Ampicillin	MIC50 ug.mL-1	-1	21.529	IC50 (uM)	Streptococcus pyogenes	n.d	ST	Gram	Respiratory	Escherichia coli	K-12	Spherical	None	None	0	t	0.093	0	0.074	0.075	STD-0.1%-	0.00734064	0.0812488	-0.147	-0.13	-0.001	0.001
1270	CdOSTN/AAmpicillin	-0.421796	70.7334	-4.37928	0.396087	1	0.0123792	CHEMBL174	CdO	ST	N/A	Ampicillin	MIC ug.mL-1	-1	50	IC50 (uM)	Streptococcus pyogenes	n.d	ST	Gram	Respiratory	Escherichia coli	K-12	Spherical	None	None	0	t	0.08	0	0.074	0.075	STD-0.1%-	0.00734064	0.0812488	-0.147	-0.15	-0.001	0.001
1271	AuSTPDT/MelAmpicillin	10.2265	81.3817	6.26902	0.999964	1	0.99811	CHEMBL174	Au	ST	PDT/Mel	Ampicillin	MIC99 ug ml-1	-1	161.696	MBC (uM)	Streptococcus pyogenes	MTCC 442	ST	Gram	Respiratory	Escherichia coli	ATCC11775	Spherical	Double	Monomer	0	t	0.263	0	0.074	0.075	STD-0.1%-	0.00734064	0.0812488	-0.143	-0.093	-0.001	0.001
1272	AuSTPDT/MelAmpicillin	10.5681	81.7233	6.61065	0.999974	1	0.998656	CHEMBL174	Au	ST	PDT/Mel	Ampicillin	MIC ug.mL-1	-1	50	MBC (uM)	Streptococcus pyogenes	MTCC 442	ST	Gram	Respiratory	Escherichia coli	MDR	Spherical	Double	Monomer	0	t	0.324	0	0.074	0.075	STD-0.1%-	0.00734064	0.0812488	-0.143	-0.093	-0.001	0.001
1273	AuSTPDT/AChAmpicillin	8.11723	79.2724	4.15975	0.999702	1	0.984629	CHEMBL174	Au	ST	PDT/ACh	Ampicillin	MIC99 ug ml-1	-1	161.696	MBC (uM)	Streptococcus pyogenes	MTCC 442	ST	Gram	Respiratory	Escherichia coli	ATCC11775	Spherical	Double	Monomer	0	t	0.263	0	0.074	0.075	STD-0.1%-	0.00734064	0.0812488	-0.143	-0.109	-0.001	0.001
1274	AuSTPDT/CQAmpicillin	9.29069	80.4459	5.33321	0.999908	1	0.995195	CHEMBL174	Au	ST	PDT/CQ	Ampicillin	IZ mm	1	5	MBC (uM)	Streptococcus pyogenes	ATCC35822	ST	Gram	Respiratory	Escherichia coli	MDR	Spherical	Double	Monomer	0	t	0.388	0	0.074	0.075	STD-0.1%-	0.00734064	0.0812488	-0.143	-0.106	-0.001	0.004
1275	AuSTPDT/CQAmpicillin	8.85435	80.0096	4.89686	0.999857	1	0.992585	CHEMBL174	Au	ST	PDT/CQ	Ampicillin	MIC ug.mL-1	-1	50	MBC (uM)	Streptococcus pyogenes	MTCC 442	ST	Gram	Respiratory	Escherichia coli	MDR	Spherical	Double	Monomer	0	v	0.324	0	0.074	0.075	STD-0.1%-	0.00734064	0.0812488	-0.143	-0.106	-0.001	0.001
1276	AuSTPDT/DMBAmpicillin	6.79894	77.9541	2.84145	0.998886	1	0.944875	CHEMBL174	Au	ST	PDT/DMB	Ampicillin	MIC99 ug ml-1	-1	161.696	MBC (uM)	Streptococcus pyogenes	MTCC 442	ST	Gram	Respiratory	Escherichia coli	ATCC11775	Spherical	Double	Monomer	0	t	0.263	0	0.074	0.075	STD-0.1%-	0.00734064	0.0812488	-0.143	-0.119	-0.001	0.001
1277	AuSTPDT/DMBAmpicillin	7.25817	78.4134	3.30069	0.999296	1	0.964452	CHEMBL174	Au	ST	PDT/DMB	Ampicillin	MIC90 ug.mL-1	-1	34.891	MBC (uM)	Streptococcus pyogenes	n.d	ST	Gram	Respiratory	Escherichia coli	ATCC11775	Spherical	Double	Monomer	0	t	0.345	0	0.074	0.075	STD-0.1%-	0.00734064	0.0812488	-0.143	-0.119	-0.001	0.001
1278	AuSTPDT/CPBAmpicillin	8.11723	79.2724	4.15975	0.999702	1	0.984629	CHEMBL174	Au	ST	PDT/CPB	Ampicillin	MIC99 ug ml-1	-1	161.696	MBC (uM)	Streptococcus pyogenes	MTCC 442	ST	Gram	Respiratory	Escherichia coli	ATCC11775	Spherical	Double	Monomer	0	t	0.263	0	0.074	0.075	STD-0.1%-	0.00734064	0.0812488	-0.143	-0.109	-0.001	0.001
1279	AuSTPDT/CPBAmpicillin	8.57647	79.7317	4.61898	0.999812	1	0.990234	CHEMBL174	Au	ST	PDT/CPB	Ampicillin	MIC90 ug.mL-1	-1	34.891	MBC (uM)	Streptococcus pyogenes	n.d	ST	Gram	Respiratory	Escherichia coli	ATCC11775	Spherical	Double	Monomer	0	t	0.345	0	0.074	0.075	STD-0.1%-	0.00734064	0.0812488	-0.143	-0.109	-0.001	0.001
1280	AuSTPDT/GAmpicillin	9.04004	80.1952	5.08256	0.999881	1	0.993834	CHEMBL174	Au	ST	PDT/G	Ampicillin	MIC99 ug ml-1	-1	161.696	MBC (uM)	Streptococcus pyogenes	MTCC 442	ST	Gram	Respiratory	Escherichia coli	ATCC11775	Spherical	Double	Monomer	0	t	0.263	0	0.074	0.075	STD-0.1%-	0.00734064	0.0812488	-0.143	-0.102	-0.001	0.001
1281	AuSTPDT/GAmpicillin	9.74009	80.8953	5.78261	0.999941	1	0.996929	CHEMBL174	Au	ST	PDT/G	Ampicillin	IZ mm	1	5	MBC (uM)	Streptococcus pyogenes	MTCC 442	ST	Gram	Respiratory	Escherichia coli	ATCC11775	Spherical	Double	Monomer	0	t	0.388	0	0.074	0.075	STD-0.1%-	0.00734064	0.0812488	-0.143	-0.102	-0.001	0.001
1282	AuSTPDT/GAmpicillin	9.81801	80.9732	5.86053	0.999946	1	0.997158	CHEMBL174	Au	ST	PDT/G	Ampicillin	IZ mm	1	5	MBC (uM)	Streptococcus pyogenes	ATCC35822	ST	Gram	Respiratory	Escherichia coli	MDR	Spherical	Double	Monomer	0	t	0.388	0	0.074	0.075	STD-0.1%-	0.00734064	0.0812488	-0.143	-0.102	-0.001	0.004
1283	AuSTPDT/GAmpicillin	9.38167	80.5369	5.42418	0.999916	1	0.995611	CHEMBL174	Au	ST	PDT/G	Ampicillin	MIC ug.mL-1	-1	50	MBC (uM)	Streptococcus pyogenes	MTCC 442	ST	Gram	Respiratory	Escherichia coli	MDR	Spherical	Double	Monomer	0	t	0.324	0	0.074	0.075	STD-0.1%-	0.00734064	0.0812488	-0.143	-0.102	-0.001	0.001
1284	AuSTPDT/CQAmpicillin	8.51272	79.6679	4.55524	0.999799	1	0.989597	CHEMBL174	Au	ST	PDT/CQ	Ampicillin	MIC99 ug ml-1	-1	161.696	MBC (uM)	Streptococcus pyogenes	MTCC 442	ST	Gram	Respiratory	Escherichia coli	ATCC11775	Spherical	Double	Monomer	0	t	0.263	0	0.074	0.075	STD-0.1%-	0.00734064	0.0812488	-0.143	-0.106	-0.001	0.001
1285	AuSTPDT/DMBAmpicillin	7.14056	78.2958	3.18308	0.999208	1	0.960193	CHEMBL174	Au	ST	PDT/DMB	Ampicillin	MIC ug.mL-1	-1	50	MBC (uM)	Streptococcus pyogenes	MTCC 442	ST	Gram	Respiratory	Escherichia coli	MDR	Spherical	Double	Monomer	0	v	0.324	0	0.074	0.075	STD-0.1%-	0.00734064	0.0812488	-0.143	-0.119	-0.001	0.001
1286	AuSTPDT/CPBAmpicillin	8.45886	79.6141	4.50137	0.999788	1	0.989028	CHEMBL174	Au	ST	PDT/CPB	Ampicillin	MIC ug.mL-1	-1	50	MBC (uM)	Streptococcus pyogenes	MTCC 442	ST	Gram	Respiratory	Escherichia coli	MDR	Spherical	Double	Monomer	0	t	0.324	0	0.074	0.075	STD-0.1%-	0.00734064	0.0812488	-0.143	-0.109	-0.001	0.001
1287	ZnOSTN/AAmpicillin	2.52902	73.6842	-1.42846	0.926152	1	0.193339	CHEMBL174	ZnO	ST	N/A	Ampicillin	IZ mm	1	5	MBC (uM)	Streptococcus pyogenes	n.d	ST	Gram	Respiratory	Bacillus sbtilis	MD	N/A	None	None	0	t	0.388	0	0.074	0.075	STD-0.1%-	0.00734064	0.0812488	-0.147	-0.15	0	0.001
1288	ZnOSTN/AAmpicillin	1.29133	72.4465	-2.66615	0.784373	1	0.0650006	CHEMBL174	ZnO	ST	N/A	Ampicillin	Inhibition mm	1	11.686	MBC (uM)	Streptococcus pyogenes	n.d	ST	Gram	Respiratory	Bacillus sbtilis	MD	N/A	None	None	0	t	0.167	0	0.074	0.075	STD-0.1%-	0.00734064	0.0812488	-0.147	-0.15	0	0.001
1289	AuSTPDTAmpicillin	5.0852	76.2404	1.12772	0.99385	1	0.755417	CHEMBL174	Au	ST	PDT	Ampicillin	MIC ug.mL-1	-1	50	MBC (uM)	Streptococcus pyogenes	CN10	ST	Gram	Respiratory	Escherichia coli	MDR	Spherical	Single	Monomer	0	v	0.324	0	0.074	0.075	STD-0.1%-	0.00734064	0.0812488	-0.143	-0.134	-0.001	-0.002
1290	AuSTPDTAmpicillin	5.18909	76.3443	1.23161	0.994454	1	0.7741	CHEMBL174	Au	ST	PDT	Ampicillin	MIC ug.mL-1	-1	50	MBC (uM)	Streptococcus pyogenes	MTCC 442	ST	Gram	Respiratory	Escherichia coli	MDR	Spherical	Single	Monomer	0	t	0.324	0	0.074	0.075	STD-0.1%-	0.00734064	0.0812488	-0.143	-0.134	-0.001	0.002
1291	CdSSTN/AAmpicillin	3.58129	74.7365	-0.37619	0.972914	1	0.407046	CHEMBL174	CdS	ST	N/A	Ampicillin	MIC ug.mL-1	-1	50	MBC (uM)	Streptococcus pyogenes	n.d	ST	Gram	Respiratory	Escherichia coli	K-12	Spherical	None	None	0	t	0.324	0	0.074	0.075	STD-0.1%-	0.00734064	0.0812488	-0.147	-0.13	-0.001	0.001
1292	CuOSTN/AAmpicillin	2.52902	73.6842	-1.42846	0.926152	1	0.193339	CHEMBL174	CuO	ST	N/A	Ampicillin	IZ mm	1	5	MBC (uM)	Streptococcus pyogenes	n.d	ST	Gram	Respiratory	Bacillus sbtilis	MD	N/A	None	None	0	t	0.388	0	0.074	0.075	STD-0.1%-	0.00734064	0.0812488	-0.147	-0.15	0	0.001
1293	CdOSTN/AAmpicillin	0.944704	72.0999	-3.01278	0.720049	1	0.0468518	CHEMBL174	CdO	ST	N/A	Ampicillin	MIC ug.mL-1	-1	50	MBC (uM)	Streptococcus pyogenes	n.d	ST	Gram	Respiratory	Escherichia coli	K-12	Spherical	None	None	0	v	0.324	0	0.074	0.075	STD-0.1%-	0.00734064	0.0812488	-0.147	-0.15	-0.001	0.001
1294	CuOSTN/AAmpicillin	1.00011	72.1553	-2.95737	0.731081	1	0.0493893	CHEMBL174	CuO	ST	N/A	Ampicillin	MIC nM	-1	2500	MBC (uM)	Streptococcus pyogenes	MTCC 442	ST	Gram	Respiratory	Escherichia coli	MD	N/A	None	None	0	t	0.115	0	0.074	0.075	STD-0.1%-	0.00734064	0.0812488	-0.147	-0.15	0	0.001
1295	CuISTN/AAmpicillin	3.05385	74.2091	-0.903637	0.954948	1	0.288304	CHEMBL174	CuI	ST	N/A	Ampicillin	MIC ug.mL-1	-1	50	MBC (uM)	Streptococcus pyogenes	MTCC 442	ST	Gram	Respiratory	Escherichia coli	K-12	N/A	None	None	0	t	0.324	0	0.074	0.075	STD-0.1%-	0.00734064	0.0812488	-0.143	-0.15	-0.001	0.001
1296	CuOSTN/AAmpicillin	2.52902	73.6842	-1.42846	0.926152	1	0.193339	CHEMBL174	CuO	ST	N/A	Ampicillin	IZ mm	1	5	MBC (uM)	Streptococcus pyogenes	n.d	ST	Gram	Respiratory	Bacillus sbtilis	MD	N/A	None	None	0	v	0.388	0	0.074	0.075	STD-0.1%-	0.00734064	0.0812488	-0.147	-0.15	0	0.001
1297	CuSTN/AAmpicillin	-0.141776	71.0134	-4.09926	0.464615	1	0.0163144	CHEMBL174	Cu	ST	N/A	Ampicillin	Inhibition %	1	70	MBC (uM)	Streptococcus pyogenes	n.d	ST	Gram	Respiratory	Bacillus subtilis	ATCC6633	Spherical	None	None	0	t	0.13	0	0.074	0.075	STD-0.1%-	0.00734064	0.0812488	-0.147	-0.15	-0.001	0.001
1298	CuOSTN/AAmpicillin	2.14463	73.2998	-1.81286	0.895165	1	0.140293	CHEMBL174	CuO	ST	N/A	Ampicillin	MIC ug.mL-1	-1	50	MBC (uM)	Streptococcus pyogenes	VT 59	ST	Gram	Respiratory	Bacillus sbtilis	MD	N/A	None	None	0	t	0.324	0	0.074	0.075	STD-0.1%-	0.00734064	0.0812488	-0.147	-0.15	0	0
1299	CuOSTN/AAmpicillin	1.17373	72.3289	-2.78376	0.763818	1	0.0582082	CHEMBL174	CuO	ST	N/A	Ampicillin	Activity %	1	70	MBC (uM)	Streptococcus pyogenes	n.d	ST	Gram	Respiratory	Bacillus sbtilis	MD	N/A	None	None	0	v	0.146	0	0.074	0.075	STD-0.1%-	0.00734064	0.0812488	-0.147	-0.15	0	0.001
[truncated: 26,104 more rows]

## Sheet: 102 EXP CASES
n	DADNP	Drugs	CMPD_CHEMBLID	cd1 = Specia	cd2 = strain	MIC(μg/ml)	cutoff	f(vij, vnj,vsj)obs	f(vij, vnj,vsj)pred	p(vij, vnj,vsj)obs	f(vij, vnj,vsj)calc	f(cd0,cn0)ref	LogP Note	D1=ALOGP	Sh(LOGP)	<Sh(LOGP)>	DSh(LOGP)cd1,cd2	DSh1(Lins)csj	DSh1(Louts)cnj	NP	NP Type	Shape Observed	Shape used	Size note	APSn(nm)	AMVn	Apn	t(h)	Sh1(AMVn)cn	Sh1(APn)cn	Sh1(APSn)cn	Sh6(t(h)n)	<Sh1(AMVn)cn>	<Sh1(APn)cn>	<Sh1(APSn)cn>	<Sh6(t(h)n)>	DSh1(AMVn)cn	DSh1(APn)cn	DSh1(APSn)cn	DSh6(t(h)n)	COAT_KEY	cc1 = Coating mult.	cc2 = Poly.	PSA1c	PSA2c	Sh(PSA1c)	Sh(PSA2c)	<Sh(PSA1c)>	<Sh(PSA1c)>
[truncated: 102 more rows]
[truncated: 2 more columns]

[truncated: 2 more sheets: MRN, MODEL]
