# Supplementary material for: Towards rational nanomaterial design by predicting drug–nanoparticle system interaction vs. bacterial metabolic networks
Source: Royal Society of Chemistry journal article supplement (doi:10.1039/d1en00967b), 2022-01-01
Supplement: d1en00967b4.pdf [file d1en00967b4.pdf]

## SUPPORTING INFORMATION

### Towards Rational Nanomaterial Design by Prediction of Drug-Nanoparticle Systems Interaction vs. Bacteria Metabolic Networks

*Karel Diéguez-Santana*<sup>1</sup>, *Bakhtiyor Rasulev*<sup>2</sup>, and *Humberto González-Díaz*<sup>1,3,4\*</sup>

<sup>1</sup> Department of Organic and Inorganic Chemistry,  
University of Basque Country UPV/EHU, 48940 Leioa, Spain.

<sup>2</sup> Department of Coatings and Polymeric Materials,  
North Dakota State University, Fargo, ND, 58102, USA,

<sup>3</sup> BIOFISIKA, Basque Center for Biophysics CSIC-UPVEH, 48940 Leioa, Spain.

<sup>4</sup> IKERBASQUE, Basque Foundation for Science, 48011 Bilbao, Biscay, Spain.

#### QSAR model report form (QMRF) for the Prediction of Drug-Nanoparticle Systems Interaction vs. Bacteria Metabolic Networks, following the OECD template

Model for prediction of the Drug-Nanoparticle Systems Interaction vs. Bacteria Metabolic Networks for Rational Nanomaterial Design, developed using IFPTML model (Linear and non linear)

In this section we rely on other QMRF reports conducted to demonstrate that the developed model is fully consistent with the OECD principles for validation of predictive models for regulatory purposes <sup>1</sup>we summarize here all available information on the development and evaluation of the IFPTML model in a concise manner. For this purpose, we follow the guidance of the JRC QSAR model database and the research by <sup>2</sup> that performed the necessary alterations for nanoinformatics data.<sup>3</sup>

Principle 1–A defined endpoint.

|                    |                                                                                                                                                                                                                                 |
|--------------------|---------------------------------------------------------------------------------------------------------------------------------------------------------------------------------------------------------------------------------|
| Species            | Multiple.<br>ChEMBL AD: >25 bacteria species with >90 strains.<br>NP: 34 bacteria species/strains<br>MN dataset >20 bacteria species                                                                                            |
| Endpoint           | Antibacterial activity                                                                                                                                                                                                          |
| Endpoint comments  | Antibacterial activity (values of >300 parameters (MIC, IC50, etc.)).<br>ChEMBL >160 000 biological assays of >50000 compounds<br>NP dataset includes 1 out of 4 parameters of activity for 300 pre-clinical assays of NP vs AD |
| Endpoint units     | Diverse (MIC: $\mu\text{g}\cdot\text{mL}^{-1}$ MBC $\mu\text{g ml}^{-1}$ , IZ mm, etc)                                                                                                                                          |
| Dependent variable | The scoring function $f(v_{ij}, v_{nj}, v_{sj})_{\text{calc}}$ used to calculate the posterior probabilities which the DADNP is short listed for experimental biological assay                                                  |

|                                       |                                                                                                                                                                                                                                                                                                                                                                                                                                                                                                                                                                                                                                                                                                                                                                                                                                                                                                                                                                                                                                                                                                                                                                                                        |
|---------------------------------------|--------------------------------------------------------------------------------------------------------------------------------------------------------------------------------------------------------------------------------------------------------------------------------------------------------------------------------------------------------------------------------------------------------------------------------------------------------------------------------------------------------------------------------------------------------------------------------------------------------------------------------------------------------------------------------------------------------------------------------------------------------------------------------------------------------------------------------------------------------------------------------------------------------------------------------------------------------------------------------------------------------------------------------------------------------------------------------------------------------------------------------------------------------------------------------------------------------|
| Experimental protocol                 | <p>Full experimental description can be found in Hwang, et al. (2012). <i>Journal of medical microbiology</i>, 2012, 61, 1719-1726, DOI: 10.1099/jmm.0.047100-0, and Vazquez-Muñoz, et al. (2019), <i>PLoS One</i>, 14, e0224904-e0224904. DOI: 10.1371/journal.pone.0224904</p> <p>Short description: The dataset consists of different cases of AD, NP, and MN We assigned all cases to either training (subset = t) or validation (subset = v) series. We selected the original data from the three datasets randomly to create triads. These triads are formed by one AD, one NP, and one MN cases (representing putative DADNP vs. MN interactions). However, we need to impose some constrains in some labels due to the IF process. The cases forming one triad have the same value of the labels c0d and c0n (same biological property) of AD and NP whenever it was possible. The cases of the triads have also the same cd1, cn1, and cs1 (bacteria specie) whenever it was possible. All triads have been ordered according to these main labels (stratified sampling). Subsequently, cases were assigned to set = t and set = v (representative sampling) in a proportion 75% vs. 25%.</p> |
| Endpoint data quality and variability | The antibacterial biological activity was extracted from preclinical cases reported in the ChEMBL, NP, Ochem, and MNs databases of Barabasi's group (Jeong et al.) <i>Nature</i> , 2000, 407, 651-654.                                                                                                                                                                                                                                                                                                                                                                                                                                                                                                                                                                                                                                                                                                                                                                                                                                                                                                                                                                                                 |

Principle 2—An unambiguous algorithm.

|                          |                                                                                                                                                                                                                                                                                                                                                                                                                                                                                                                                                                                                                                                                                                                                                                                                                                   |
|--------------------------|-----------------------------------------------------------------------------------------------------------------------------------------------------------------------------------------------------------------------------------------------------------------------------------------------------------------------------------------------------------------------------------------------------------------------------------------------------------------------------------------------------------------------------------------------------------------------------------------------------------------------------------------------------------------------------------------------------------------------------------------------------------------------------------------------------------------------------------|
| Type of model            | Perturbation-Theory Machine Learning Information Fusion (IFPTML), LDA, Artificial neural network, multilayer perceptron (MLP), k-nearest neighbour (kNN), Random Forest, boosting algorithms, etc                                                                                                                                                                                                                                                                                                                                                                                                                                                                                                                                                                                                                                 |
| Explicit algorithm       | Use kNN with k value equal to 1 (LinearNNSearch with EuclideanDistance as type of nearest neighbor search algorithm), SVM non-linear with Radial Basis Function (RBF) kernel.                                                                                                                                                                                                                                                                                                                                                                                                                                                                                                                                                                                                                                                     |
| Descriptors in the model | Statistically significant descriptors used for prediction of the Drug-Nanoparticle Systems Interaction vs. Bacteria Metabolic Networks include all the important variables AD structure and assay conditions, NP properties, CA structure, NP assay conditions, MN structural parameters.                                                                                                                                                                                                                                                                                                                                                                                                                                                                                                                                         |
| Descriptor selection     | <p>Number and type of descriptors initially screened: 18 descriptors:<br/> Reference Functions each systems and Reference Functions (AD-NP-MN) <math>f(c_{d0}, c_{n0}, c_{ds})_{ref}</math><br/> AD: <math>\Delta ShLOGP</math>, Logarithm of the n-Octanol/Water Partition coefficient, <math>\Delta ShPSA</math>, Topological Polar Surface Area, <math>\Delta ShNVLR</math>, Number of Violations of Lipinski's Rule.<br/> NP: AMVn: Average of the molar volumes of the elements that form the nanoparticle. Aen Average of the electronegativities of the elements that form the nanoparticle. Apn Average of the polarizabilities of the elements that form the nanoparticle. APSn Average Size of the nanoparticle. Time: Time assays of NP-AD.<br/> Metabolic network: Number of substrate (N), number of links (Lins</p> |

And Louts), number of individual reactions or temporary substrate-enzyme complexes (R), number of enzymes (E), the exponent  $\gamma$  and the diameter of the metabolic network (D).

Systems:  $\Delta\Delta\text{Sh}(\text{LOGPi},1c,2c)$ : LOGP drugs, NP Coating agents 1 and Coating agents 2 (if applicable) and  $\Delta\Delta\text{Sh}(\text{PSAi},1c,2c)$ : PSA drugs, nanoparticle, NP Coating agents 1 and Coating agents 2 (if applicable).

Method used to select the descriptors: Forward Step-Wise (FSW) feature selection strategy (Linear Discriminant Analysis (LDA)) Expert-Guided Selection (EGS) was used incorporated missing features.

|                                                     |                                                                                                                                                                         |
|-----------------------------------------------------|-------------------------------------------------------------------------------------------------------------------------------------------------------------------------|
| Algorithm and descriptor generation                 | Experimental measurements: See Nocedo-Mena, et al. (2019). J Chem Inf Model, 59(3), 1109-1120. doi:10.1021/acs.jcim.9b00034.                                            |
| Software name and version for descriptor generation | STATISTICA 6.0 software<br>PTML Multi-Label Algorithms: Models, Software, and Applications (See Ortega-Tenezaca, et al. (2020). DOI: 10.2174/1568026620666200916122616) |
| DADNPs/Descriptors ratio                            | 15545.75 (124366:8, number of data rows divided by the number of significant descriptors in the training set)                                                           |

#### Principle 3–A defined domain of applicability.

|                                                               |                                                                                                                                                                                                                                                                           |
|---------------------------------------------------------------|---------------------------------------------------------------------------------------------------------------------------------------------------------------------------------------------------------------------------------------------------------------------------|
| Description of the applicability domain of the model          | The Domain of Applicability domain (DoA) is defined by fixed boundaries (threshold). The threshold is calculated by considering Euclidean distances between all training set DADNPs vs MN Systems.                                                                        |
| Method used to assess the applicability domain                | Leverage Method                                                                                                                                                                                                                                                           |
| Software name and version for applicability domain assessment | STATISTICA 6.0 software was used. <sup>4</sup><br>Origin Pro, version 2019, OriginLab was used for graphics.                                                                                                                                                              |
| Limits of applicability                                       | $h^*$ threshold: 0.0002<br>The leverage threshold was fixed at the critical hat value ( $h^*=3(p+1)/n$ ), where $p$ is the number of descriptors of the model and $n$ is the number of training compounds). Predictions outside this threshold are considered unreliable. |

#### Principle 4–Appropriate measures of goodness-of-fit, robustness and predictivity.

|                                            |                                                                                                                                                                                                                                                                                                     |
|--------------------------------------------|-----------------------------------------------------------------------------------------------------------------------------------------------------------------------------------------------------------------------------------------------------------------------------------------------------|
| Availability of the training set           | Dataset AD-MN: Nocedo-Mena, et al. (2019). J Chem Inf Model, 59(3), 1109-1120. doi:10.1021/acs.jcim.9b00034<br>Dataset NP: Speck-Planche,(2015). Nanomedicine (Lond), 10(2), 193-204. doi:10.2217/nnm.14.96                                                                                         |
| Available information for the training set | Preclinical Antibacterial activity of the >160 000 biological assays of >50000. Preclinical antibacterial activity of the 300 pre-clinical assays of NP vs AD<br>Analytical information on the experimental process can be found in Nocedo-Mena, et al. (2019). J Chem Inf Model, 59(3), 1109-1120. |

---

|                                                                   |                                                                                                                                                                                                                                                            |
|-------------------------------------------------------------------|------------------------------------------------------------------------------------------------------------------------------------------------------------------------------------------------------------------------------------------------------------|
|                                                                   | doi:10.1021/acs.jcim.9b00034                                                                                                                                                                                                                               |
|                                                                   | Wang et al. (2017). Int J Nanomedicine. doi:10.2147/IJN.S121956                                                                                                                                                                                            |
|                                                                   | Information on the molecular descriptors calculation can be found at:<br>Ortega-Tenezaca, et al. (2020). DOI:<br>10.2174/1568026620666200916122616) and Nocado-Mena, et al.<br>(2019). J Chem Inf Model, 59(3), 1109-1120.<br>doi:10.1021/acs.jcim.9b00034 |
| Data for each descriptor variable for the training set            | Yes                                                                                                                                                                                                                                                        |
| Data for the dependent variable (response) for the training set   | Yes                                                                                                                                                                                                                                                        |
| Other information about the training set                          | Total of 124366 cases for the dependent and independent variables                                                                                                                                                                                          |
| Pre-processing of data before modelling                           | Shannon's information scaling of input variables                                                                                                                                                                                                           |
| Statistics for goodness-of-fit                                    | Chi square, validation through an external test set, Matthew's correlation coefficient (MCC), <sup>5</sup> (Eq13), F1 score, the random correlation model of classification proposed by Lucic et al. <sup>6,7</sup> and the Y-randomization test           |
| Ac > 0.6                                                          | 0.97                                                                                                                                                                                                                                                       |
| Ac <sub>vext</sub> > 0.5                                          | 0.97                                                                                                                                                                                                                                                       |
| MCC                                                               | 0.798                                                                                                                                                                                                                                                      |
| F1score                                                           | 0.808                                                                                                                                                                                                                                                      |
| AUROC                                                             | 0.99                                                                                                                                                                                                                                                       |
| Robustness – Statistics obtained by Y-scrambling                  | Accuracy = 39.5 (24 iterations)                                                                                                                                                                                                                            |
| Robustness – Statistics obtained by other methods                 | Yes, see above                                                                                                                                                                                                                                             |
| Availability of the external validation set                       | Yes                                                                                                                                                                                                                                                        |
| Available information for the external validation set             | Yes                                                                                                                                                                                                                                                        |
| Data for each descriptor variable for the external validation set | Yes                                                                                                                                                                                                                                                        |
| Data for the dependent variable for the external validation set   | Yes                                                                                                                                                                                                                                                        |
| Other information about the external validation set               | Total of 41445 cases from DADNP for the dependent and independent variables                                                                                                                                                                                |
| Experimental design of test set                                   | Partitioning of the initial dataset using random, stratified sampling (75:25 training: test sets)                                                                                                                                                          |
| Predictivity – Statistics obtained by external validation         | Ac > 0.6; Result: 0.97                                                                                                                                                                                                                                     |

---

|                                                          |                                                                                                                                              |
|----------------------------------------------------------|----------------------------------------------------------------------------------------------------------------------------------------------|
| Predictivity – Assessment of the external validation set | The external validation set is 25% of the initial dataset and all predictions for the validation set fall within the domain of applicability |
| Comments on the external validation of the model         | N/A                                                                                                                                          |

Principle 5–A mechanistic interpretation.

|                                                        |                                                                                                                                                                                                                                                                                                                                                            |
|--------------------------------------------------------|------------------------------------------------------------------------------------------------------------------------------------------------------------------------------------------------------------------------------------------------------------------------------------------------------------------------------------------------------------|
| Mechanistic basis of the model                         | The structural properties of the AD and assay conditions and the complexity of the reaction metabolic network of the bacterial species influence the inhibition of the biological activity of the DADNP system (e.g., the Octanol-water partition ratio property, that expressing the lipophilicity of drugs, influences multiple drug discovery studies). |
| A priori or a posteriori mechanistic interpretation    | The NP properties such as NP size (lower inhibition of antibacterial activity), the molar volumes of the elements that form the nanoparticle and Time assays of NP-AD contribute to increase the biological activity and influence the activity of the dual AD NP system. Similarly, The Topological Polar Surface Area of Coating agents.                 |
| Other information about the mechanistic interpretation | No other information available.                                                                                                                                                                                                                                                                                                                            |

## REFERENCES (Supporting Information)

1. OECD Validation of (Q)SAR Models. <https://www.oecd.org/chemicalsafety/risk-assessment/validationofqsarmodels.htm> (december 15),
2. Papadiamantis, A. G.; Afantitis, A.; Tsoumanis, A.; Valsami-Jones, E.; Lynch, I.; Melagraki, G., Computational enrichment of physicochemical data for the development of a  $\zeta$ -potential read-across predictive model with Isalos Analytics Platform. *NanoImpact* **2021**, 22, 100308.
3. Hub, E. S. JRC QSAR Model Database. <https://ec.europa.eu/jrc/en/scientific-tool/jrc-qsar-model-database> (december 13),
4. Hill, T.; Lewicki, P., *Statistics: Methods and Applications*. 1st edition ed.; StatSoft, Inc.: 2005; p 800.
5. Chicco, D.; Jurman, G., The advantages of the Matthews correlation coefficient (MCC) over F1 score and accuracy in binary classification evaluation. *BMC Genomics* **2020**, 21, 6.
6. Batista, J.; Vikić-Topić, D.; Lučić, B., The Difference Between the Accuracy of Real and the Corresponding Random Model is a Useful Parameter for Validation of Two-State Classification Model Quality. *Croatica Chemica Acta* **2016**, 89, 527-534.
7. Lučić, B.; Batista, J.; Bojović, V.; Lovrić, M.; Kržić, A. S.; Bešlo, D.; Nadramija, D.; Vikić-Topić, D., Estimation of random accuracy and its use in validation of predictive quality of classification models within predictive challenges. *Croatica Chemica Acta* **2019**, 92, 379-391.
